# Supplementary material for: Monitoring and analysis of the expansion of the Ajmr Port, Davao City, Philippines using multi-source remote sensing data
Source: PeerJ. 2019 Aug 19;7:e7512. doi: 10.7717/peerj.7512 (PMC6705383; doi:10.7717/peerj.7512)
Supplement: Supplemental Information 5 — Landsat imagery courtesy of NASA Goddard Space Flight Center and U.S. Geological Survey [file peerj-07-7512-s005.tif]

PPPQSUWTTVUTWVUY[YX[WSTUXVTSOPQQTPPMMNPPOPONRQOPPPPRTRPPPQRSOSQPPNOONNMNPOONOONNNMMNOPONRQNOPRPNNOPNONMOPPPPQRQPMMQORQQRQRQQPQOQOQPPQRRRSUTSWUOQSRURTUTSPQSSRSTTSRSRTX[YWTTVWUZWTUXVVZYYWV[[Z[YYYXWZVWYVWYZ[WVUUSQRRRSPSTRSSVQTTSTRQQQTRTZ^\YWSSUVWYXXXWXVWWVUWTX\XUUTTTTWXW[\[\UUSTSTX[YZZY[WVVWVWWXVWYWZ[]ZXWUVTTYWW`d[USRQTTRUUVWUVSSTSU[pwpoy_VUWYZ\evlUSSQRRQRRRQOQQQRTRSPQTXTSSSTWYZ]cb^_ht}zi`cec_^bcfdddeedfihddfdbgefgfdgefdddccc_`^\__^^_accaa^^ab__c]`_`a]\^^^^]]^]\_`_]]\^]__]^][^]][\\]\\]^``^_`a][[_aQOSTTSVUTYXTXSTTW\[ZYUUTSSQROPSTRPQOOOOOPPNOPNQPOOPRTSPONPQTSSQOPNPOONNOPOPMONNNNMMNOOONQPNNORRPNQOOPOOQPNPPQSQPQOROQQPQSQQUOQQQQQQSRQRVYXTSVVRRTRTTSVQSRTRRPRTQRRRSSWXYVUVWWWZSYUTSRVXWYXmzoaZ^\WVXXXY[`\W\XUSTWSPRQQQRSSSSRUUVTTTSTOTPRSVacZWWYWT[`]]\]_YXYZXY[[SRRTSSSVY[]]^[UTTUUVYZWU[^_XWWVUWVXXXZXZ]^ZXWUVTTWVV^b[UTRRTTRUUUVUVTTTTVXk}ux`e^]_p|dSSSRSRPQQQQQQQSPRSRRTW\VSRTTUY[[\\[\\`jv}vmddjfdc^beghfhgfgghhecdcdgefeebficefcaaaa^_\a_^_`bcdc____a^a`a_``^]_^\^^]]]^``^\]`]_^^`]^`[_]ZX[\^]]^^^]`a`a_\Z^`PQSSRPUTTVUUUUTVVUYXXWTSSRRRQSSQSRROOONONPNONPPONQPMPRQPNNONOQPMOMMONNNPQPRMONMNNMMNNOONPPNNOQQPNPNNNPPNPNRORUSQOOPQSRPQQPSURUSPTSRTRTS[c]USWWUTSRRRRRQRQPRTPRTRPSSPSUUVURRSXZWSTUSSRTPVWbrwsb`aXTVWVX_\USSRURQTTQQRQPQQQSSSVVUSSTRSRTRWV]bd\WUXTU^cabcdeXWXWWXYXSQSSUUVXZ[^__ZUVWWWUWZXWYVXVSVXVXXXUVWY^a`[YWVVTTVUU[`[UTSSTSSUTUVUWVVUUWWh{snad]^\s~fTRRRSRQQPQRRRQPQURTUTVUTUZTYWY[\]]\]ZX^iroecbdcbc`ddihfghgffggdccbceefeccgdefcc`b^]aa^^Zccccb`^^`b`a_`a_b_a__^__\`^[]^^_^]]]^_\\a]]^]_^[X[\\]]__a_____^]]^`RNPQPQSSVVSUUTQSUUWXVUTUTTSSSRQNQQQPQPNONOMMQNPPOPNPPNPPOMLNNNNMMPOPNNOPMLMQOOMONMMNNOONOPNNOQQPNOMMNPPNPNNNNRQQPOPPRQOQPPPPQRQRRTRTSSUXa]USXXUTQQSRRSSRSQUOOQSSQRPSRRTSTROTYYVSSRSSQSSSSWgctpda\WTWUU\]VQSSQQQPQPRQQQQQQRRRSVWTQRRRRSSXYX\^dVTRSUU\`_^`ddYVXUUXWYSSQSXYWWX[\df[UWXXVVWXZZVSWTWUXXXWWSVUW\]]ZYWTTUUVVUY_\UUTTTSSUTUUUXXXVWWWev}}lh^ZVVVX]`ebZUSTRSRRQRRQQQRQQOQUUUTUYWXV\fpcZ[YY]^[XZ^dgcbceebaaaeejjikhgihhfdcabeffdcdfgeeddcabbaa^_^adddab_^aaa``_`aaaa^``___\_\_]]\^]\\^`\^a]^]\[\^\\Z_[^^`a^_^___aa_`POPPOPRTUVUVURSRWSSVSTTTUWVUTQPPOOPOORPQMNNMMMONPQOOMMPOOMLMNONNONNOMMQMNIPOOOPMOKPOOOOOOPNNOQPPNNMNOPPOPNNNNRQPOOPPOPOOPPOQSQQQRSQQPRSTWVPPYSTTRSVUSUUSQQSQPQQRPQRRRRQRVRTWZWWUSQRTSSRTQR[bch`\ZTW[YYZVURRSQPQPRRRXWQRQPRRSTVVSRSRSURRSTQVV]RTTVXUX]_^bdaZXYXYWYZUSRUXXWXWY\cf\XXUTUVVW[[TVVSWWWZRWURWYYXZ\XWTTWUTUTUY[]YVVVTSTUTTUUYZZWWWWbqy}}~yyeb[WUUUW[^WPURVSTQRRRTPQQSRRTSSUVWUUXXUWbwxa[ZXSV[_`aaceeeca`chhkkkifihgegfeedefeddffeccdcd_ac`a`_bbccbb]_```__a`__`_____^^\]]^^]\_]]]]^]^]]^\\]]^_^]^Z_\___\a_]``_^\QQRPQORUWVTVXWVVUSSTTRWYVXVUOOPPPNLLOPQQONLMOONMPPPKMNONOPLONNONNONMNMNMMMMNOOOOLMOONOQNPPQOOQPPOMMNOPPOPOOOORQPOOPPOPOPPPQSRRSRRTRRSQRSSSURVSRRSUWUTSVSRSSSRRSQQSPTQRPSSUVZ[VWWSQRSRRRQRSU\`ae[WZd\YVWSVSRPRQRPQRPRSTUQTTSTVYVSSSQSSSSRQQRSWSTVUTTVYYZYWZWW[\ZXZ[XVVVXZZXZ\`abZWVWWYWVXWWUUVUVWVUVWWTZ[\\XZYXUUVUSTTT^ieZTTUTRUTSTUVZ\\XWVW_lu{|zu|q_]XTUTTVZ\UQUSVSTQQQTRSQUWWSTSUUVWUUUVW[ep¯»£zgYXWSWV]^bdefehecceggjijigiiefjiiedfeedcgffeccdcbaa`c````e`ac]]`b^^_^``a`^_ba^`^^\`^]]``]\\^^\][^^[]^^^_`_^]][``a_^^_`c][[RRRPQNQQRQRTXVUWTTTRTPUPUSTSNPPPOOLLPPQPPONOPRQNPPPMMMOPNNMNNLNOONNMNNMNNNOLOMNNNPNPNONNNQQNMNPNPPOOPPPPPPPOORQOOOPPOQPQQQQRRSRQRSQRRPQRRQUUSSQSSTSQSTXVUURRRRQQQQRPQSRSSRVYZTUUUPSQRRRQRTV\^WTUXZ^ZSVVWUTUSQTSOQPQPPSRRVWVVWWTTTRQRTRROSQPQWVVXWUTWVVYWVYWVW[XWXXXXWWWXWW\fsi_XUVVVWXTTTWXX[XWXWSSVWX[[Y[ZWYYUVVRVVTS[^YZVSTSSVRRTSWVV[[WVW\gqy{vqtjXWUSUTTUX[TRVTVTTRRQTRSQUX\VTWTWVVUWXYZ]`Zh«uihXVSW[`_ceifegeddggfhihhiiiihjhhfdeddcbdffdbccb`aa`bcaab`_aa_^]bb_a```^^]_a`__`__`_]]__]]][^[_[^[[^[\^\\]]]\_^^_`^a`a`]Z[ORRRQNRQROSSVWSSRSVUTRPRTOSROPPOOQLNPOOTRONOSUQMOPPNOPRSPNMPMNMOOQPOMMNNNNOOOONONMONNOPSOMSOMQPOPQOPQONNPRQPPRROOOPPOQQQQRRRSTQQRSRRRQRRRSSPRPSTRURQRRZ\UTRRQRRQRQRRQSVUTSQVUVRWQPSRSRRTRRU[ZUTWZWTSQUUTVUURSSQSQRQSORQQTVTVXUUTSPSQRQQQTSQTWWWYYWWUWUXYXVXVVTWVVXYWWWVVVVZfthbUXWWXXUTRTW\YYXVYYVUYVVYZWWYWXWVSTUUUSUTUTYZTSRSTSSTUTSTZ]WXZ[akx{wmmcRRRSUSSTWYUSWUVUUSRRTRSQUXZUSVTWWXVSW]Z^[U^m~ihp]WZV^^acgjfgigfehghhigfghgfhhghffecdadcedbdbbbbbbabb`acba_`^_^`a_``a_a_^]`aa`_`_^\]`^___]]ZX_[^W__^[\___^]]_^]_^]a`a`\[\OQRSLQTUPPSPTWTQQTTTTTRSTQRQMNRNOPMNVQTRQOPPUSQORPNQQPQPROMNOQOOOPRNMNNNMPONOQPLOPPNNPOQMLQPQOQNRQNPRPNMPRQQPPTROPQPORRRRSSRSUPQRSSSSRSSRSSQSQQRTRSSQQUZUUSRRRSRRQOPRRWZSQSRTSPRSQSTTSSRSRTYWYXVUTRQTWUTRRRQRRSOQTRQQSQQSSSUTSTTTTURRQSRTTQS\^XYWVUVWWYZXVWTUUUWTVVUUUSSTSV[]][XZVWVUTTWVWZ[WUZZZXVUUVVXXVXVVYWUUTSSRSSTRWZUSRRSSTUUSTUY[XZZZX`iorkk_UTSTUSSSVXVTXVVVUTSRTSSRUWXTSVUWWZYVY^\]XT\ZY[Z\`c_\^`^bcgeehkhfeijghihhifhifggeedfddabddfceadbda`bababcbb_]]_`^^`]a_`b__\]`_^``_^^]__``a_][X^[Z[^^^\\^^`]]^___]]_``a][\]QRSSQTRSQRNQRRQRTSRRSUVVTQQQMNPQOONQWRSQPPOPUWSQTROQSSQOPOMORWVTOLPOMNNPNMMNNPOPONOOPPMPOOMOORURQOPOPSPOOOPPOPQSPPRQPQOQSUTRTVPQSSTSTSTSRSSSTSSRTRSSQRTWUTQPURRPTQQPRSTRPQQRRRSSPQRTTRTPPRV]ZWTOPRQRRSUSQRQQRRSTRSTVQTPRPUUVUURRVUSRRRSRSQRQX^TXUXUWXYXVWSSSSSSRRTQRRQQSSQTYYY[[XVVUVUYXWUX\VW]YWXVXWXXVVWVVY[XUSUSTRTTVRUVZTRTRRVVUVTZ^_`a^`]Z[akrkZ[[YWVY\\deXVYXWWVTSSTSSRUVWTSUVWY]\Z\__\WU[YXYXWWekc^^`bbbfiiihgfighjiighggffgfcceeddbdfcddbcdcbcaaaabcba`_\\]^___\`^a_a`[]__a____``__^`a_\[[^Z\_^`]^]]^^]]]_^\_^_`a__\^_RTTTROQSSNOQQPRSPOPQSTTRRTTRNOPQQOOPQSRONOOPQVSRQPOQRXWQNMRWSQTSOPQNOLPNKNKPNPNPRPQQPOPRPNNNNSSMPORPNOQONNOOPOPRPPVRNPPQSWUSQQSQTTUTUUTSRSSUUURSTRSSRTUVUTQRSRQPSSRPRSTQPRSRQSSSRSRRRQSSUTUZXSPPSRQRRTUSSSSSRTUVSSVRRRSPRUUWUSTSTWUSRTSQQQSRRZTWVUTTW\UWVQRTSQRQQQPQRPPWRSXYYWZYUVWVXYWUZVYa_ZYXYXYZXYVTSUXYZ[XUTTTUTTUVUSU]WTVRSVWWV[bghjnqr`X\_lwpaZ[ZZYSXWb`UX^\]][WTTTTSSSTUSSUWX\_`^^``[YVZXWXWVXchb^^`bafhffefgghjfjjigjgieffcddbccdcbcefcdcc_b```bbdcbbbb`\]__^]]^^b`aa\]_]aa`_a_^^^^``_^\^][^^\\^`^^]\^^\^^[]^^_a`^___RQSQPPPRRONNQQQQMONQQQPQPRQTPNPOOQPRQQQPPPPMOS]USRPSTXWPPOUTNLMPPSWSNMRNMNLPMMNPSRQRPNQQPPONPQPQNNORNQOPPOOMNOPQPOSSOPOPPQSRPSTSRSVSWWSTSTTWWTQTTRSSTTTUUTRTRQQPSSRQRSSRUTRSSSTRRRQSTRTUPSRTRTPPRPRRSPQTUVUSSTWWUTTSRVRRSRQWUTRSTg]TOPSRRTTTWWZ]WSUSTYUVUUSSSQRQOQRQQSRRRTZWXXXUTXVVWWVWZXZ`][XY\\XYVYUXWWWWXZXUUUTTUTTSQTTZ[SVVUVY_`is|uonqn`[^ahqigadie_VZS]YRV[XVZZWTTTTUTSSTSSUX[_bcbaa_]ZWYWVVVWZaea^_acbfhffeeffkgkhikhiihggffbbabdeedffdbccaaaacbaacbc`ccc]]``_^`__a`a^_^a_^]`__`^aa^____]^^[]]\]\^^^\^^]_\]]^_^__^^`a`PONMNPOOPOPTTRQPPPPOMPPPMMSOOOOONPQRSTRPRPMNSag[XTRRSWRQUTSRONNOOOQTVVVROMOONOMPNQTTUPPNOQONNPOONNOPQOQONNOPPQPROPQOOPPQQSRSSTTURWUSUURUSUQVURQUTSSTSSSTUTRRRRQPSSRRRRSRTSRTVUSRPPPUUQQRPSQRRPQQPQTRSSRTUWTSTWUSSTSTTUSQPRPYWVUX`{`UQPRQPTTSUTZ]USRQSVUUTSSRRQPQNQPRQRRRRUYXWWVVYWXTTUVXYZWX\\WW\[XWVXXYWVVVWYXUTUSRTUTTTUUYYUZWZ^^``rwsruqrj\Y[bnnjtqrvnaZXSZYUTYZUWUUVSRSRTSSUSPQT\begfdc`^[XXVUUVX[`b`^`bddghgfffggkhkhijhjihfgggccb_ceeeedcdcbabcabb`bbacbdab^^b`__^`````___^^^_`^``a_`_``_^^^[[]\Z]^]]^_^\^[\_]]]Y\_`a_`_POQOOONPQRRTQOPOPOOOQPONLNONOOMQNRNRRPONNNMOWbgcYXWYZ]XVYTRQOONOMNOPSVWQOMOOOPNNMQUVVQROPPPNNOPPPPPPRVOOMNRPPKQQPOPQQPQPOPSRTTRVUTTTRUSVRUUUSQQSSSSRRRSSUTSSSRQPSSSRQRSRSRSTYVSRQPPQSQRRQRRRTUQNTRSURSVTUVSVVUTTTSRPSRSURQQSUXV]ov[TQQOQRQQTVVTTRQSRQTSSRRSSSPPRPPPQSSRRPVZYYZYXXUUTTSTVY\\XZ\ZVWXXXZZZXYWZVXWVVVXVSSUVTSTUWWY\]\]]YY[]`djjum\[]hm`_kt}paZUSRWZ]U[]SUSTVRPRRSUSSSSSX_edhmied`\ZXVUVWZ]^___bdfeghggghhhkjkijihihhffgfdd`cdddaecddbcca__baacaacbc`b_]]^__^`_`a`^__^^^_`^__`_a````b\^^\^^^]^_]]_\^]]^^\[[^_^_a_a_SPQOPONNQSRQNONNNPONONOPNOPOPNNOMSQPPNNMMOLQS\_[VRSSSUTUPMOSQNPNNNNMNOQRTSONOPNPNQTQSQQQONPOOPOPPPPQQTROPOSOPPPPQPOPRQQOPPQRTSRUVWTURSRPRTVWRQSTRSSURRSRTTSSTSRQSTRQQRSRRRST]WSSRPQRSQRRQRQQVURQPQRSURTTTUTWWUVUVRPQRQTURQRSQVXZidTTRSNRQQTTWXSRPOQQRRQRRRSSTQOQPQQQSRRPSWYW[\ZXYXVUTUWWUbiZXYWZVTVY\[YZYZZVXURUTYTSTTTUTTUUW[ZWX[YUWVXVYW]cb\\[pl\X[_gbZZSTRZ__SUSSSTUUSRTSTUVUSSU\bcd`g`cca`aa_[WX\_]]_acfgghhhhhjjjkkkjkhhhghfffedcacbaddbfcdcdccb``acbdbadcbb`[`^ba__]``_]]a]\^_`_^___^a__`^]`\]`]]^^^]^^]\Z[_^^]\]__a_^^bVSSPMMRQONONNOMMMMMNNMMNPMPNPNMMOQPRSOMQPNJOQUTUROPOOONPOLNMNMOOOONNNNLOORUPOPLMOORORRPQNOOPNNRPQPRSRQQPPRSPORQPQOQPPQOQQRTRSRSSSUUURQTURTTXSQTWSTUUSQRRTWVUVTQRTUSPQRSSRRSW`XSSRPQSSRRRQRQPTTQQPQSTQSSTSUUVYWYZXUUQSQSTQQRSTUWUZ^UPOUOTNQTSSWWUQQSPTTRTTPORTRQSRQQRSRSSR[SRUYXXXVVUTSV]bek^UX`Z`[UUYZYXXZUSUSRUWUSUSRSTUUTX[[WWWXXTVYTVVTYUVXW[n`\YXSSUY[USX__WTPURRSTQVQSRTTTUUT[_^acbf``ab]dbc^\]^^aca`eiiiiiiiilkkkkkkkhhhghfffddbbcbadccecdfcdab__`ccbdccdbc_\^^c`^`_aa^]\^^^^`____`^``_`_`^_^`_Z]^]\\^]^]_[^_^_^a^___`^_VROONORSPMMONNNNNNNONNMNPNNMNNNQNRXSRONMPMOOPSSTUMOMONMNNMNNMNNNNLOPONNNNMSRONNONNPQNPRPMOOOMNMQQQRTRRPNPRQPRURRPPPOPQPRPNRSTQRRSTWVUTTSWVTVTPTRSTURUTTRVXVVTSSSVUTQQSRRRRSZdZSTRPRSSRRRRRRPSSQQPRSTQSSTSSSVUY[[[XVVQTSTQPSPQQRU`bTQSROSOQRRSTWTOSTRSSSURSRQRQRRPQPPTURWR_RSRXZYZZWUUVW_klldZ[\^`ZTUTZ[XYWSTSTRSTVSSRQSRTTS\ZXVUUUUTUUTVUWXSWUT`gTWWVTTSXaY^a^ZTRRSSRQRTWRTSSTRVWXa`]\cea^]__]\cebc_aabeddihjjilkjknmmkkkljghgghffeddbccbadcdecdeccab__accbcbbcca^]b`c__a]`^]_```^aa^]^_]^___]__]__^\]^__]\]]^_]^_^]_^]_]\a__`RRPOOOOOOLMQNMMOKPNNMOMOOOONMMPQPUUQNNNQNPPOMSSPROMMOMNONNNNNLNNLLMOOMLMOMNSPMPOPOOPPOONMONMNNTSRQOQSPRPOPQQPQRRQQPOSNRPPRRTTQSSSRVWWVSVYUSTRQRSSTRRSWTURWTQRSTTVTSTSSRRTSVYYWSTSQSSSSSRRRRPRRQRQRTURSSTSRRUUXYYWVVUSRRSSPQSQPQQTWTRRPPRPPRVWSVTTRQQPPSSQTRRTRSTSQPQRRSYV\TRORQQUSUVVYV[eknbVWWY[UTTX]XYY[TTTUSUTUTTSSTRSST\YUSSTTSSVWTUVYVVUUZk_TXUVUTSY[WZ\[WTTRSUUUTSTUSRTRRUV_c^]\`^__\\[Y^c^^`babdejjijihljkklnomlklmjghgghffecdcdcbbdcdecdeccbb`_abbbbaabcb`_aaa__b``\_aaa^```__]_\]__^^_`^`_Z^^_]^^]^\_\_]_^]^^]^]\_`_^POMMNNMNONOMNNMONONNPNMQOPMNPOPOORQPONMPRMNNNOPQONMNNNOQOMNNMNQQNNMNQOOONNMNTRPNONNLONMMNPPORXWXUSQPOQQONQQQPPPPPPPPQNQRQPTTSSSVSSVYYYWWTRTRPQSSTRQSSQVWXUTSRTVTURRRRRSUVUWUSUYVUTUUTTSTSSSPQRRRQRTVSSSTSRRTUWWXVUTSRQQRTPQQPOPORSTRRQQQQQQRUSWWTPQSSQURQSSQVSRTTPRSQRRRUWWRPQQQQPQPRTVU[^`[UUUXYUSWYYWY]^TRTUQTSTVVRRSRTRRZ[WVQSUSVWVUTVVVUTWcpgd\VZUSSSVWYXZ\VVTQSWWVTTVTRUQUT^`_[^\][Z[\\XVY][\aacbdjjkliklnknonlonlllmjhjhhhgfecddecbbdcddcddccbca`abbbbaabba__`````aa^[^_a_aa`_a`_^____]_____^\_^^_`\`_^^]^_^^\^_`]]^^___ONLOMMMNONPPOOOPMPNMPMNQPOMNOOOPONPQOMNMNNMMMNPRONNMONRNNOQQNOPMNOMNOOPQMONMNTTPNNOMNQOMTVTSRSRSRSWSNORMOPPQOPOPQQQOOPPRPRQQSTQSSRTSWZUUTTTSQQRTRQQQRRSSVSTUUSUTTQRSSSUVWURQPTXTX]^XRTSUSUTSQQRSRSUWTSSTRQRSTVVVUTSRQQQRSPQTdrdVTMSSSURRRPQSTTVUQQRSTQSSTSPSTRTSRSTSPPSTSVZUPQQQQOQPQTVSXZVWTUVUYWUWXXY[\\WTSUQSRUTVVPUQSQRU[\WTTTUSTVUVVUUTSYeryjcVTTSVXXWY[YYURRTWYXUTUVWTT]gc\Z^Z^]YX[]\WWWZabafhgjjlonnnnoqorooommjjihhhhhhfedbdfdbcdccdcddcccca`abbbbaabb`_`````_``^[]_``]c`__^]a^`^_]`_______^]^^]]^^^]]]_]]^`^]^__^__OMMPNMNMPONOONNOLNONPONOPMMOOOOOLOOOONOOMLNLMNNQOONMPQSNPPRNNOMOONNNORQRQPOLPPRTQSQMPPORWVPOPORQPQUTNSPOOORPPSQPQTPOPRRRPPQQTSQTSSTSSUSWVTXTQRSSWUSQRRSRTSRTRSTQSRTRTXUVWURRSWVRXdfXRQTUVSUTQQPRRSVVTTTTQQRRSUTUSSRQQQQRSQRXydUQSSSTTTVROTSUYWUSSSUSTSUTTTTTXUSSQSPRSURXZUQPQQRRRPSTSUWYTTUSQSYWVWXXY[ZYTSUTTUTUVYYRUQSQSSXZZZXVSTUTUUUTQTR^ko~nZTSVVRUUTWUWRQRSTVUUTUVTW]aa^_^[YXYYZ\^ZWZ`cbdedfjnnorrpprqotnroommjghffgfghedcceeddddcdcdddcccb``bbbbaaba`_`````___^\^^__]b_^^^\^^a]^]`\_`^_`a_^^]^^^^^\]]\\]ab]__`_]]]LPOLMPNKNMPONOONOONNNMNOQOOQOPPOPOONMMOONMONMMMQPOPNPNPPNRROORQPRMONONOQRPOONMPRRVSTWWUVRPNPPPPOOLNTSPQQONQPMRQPPTPPPQQRRRRQRSTTWSTUUTWXWVWVVRRSVTTQQRRUVTSTSSSRQSTUWYRRTSQQSTRQTTRTSRSVZVVRRQPQPUTTTUTTTRSRTUSTRRQPPQQQRRU\¸ªrVVSSSSSSTQOSRW]USSQPQTVVVVTTTXXTRPTSRQTSXWURPOQSQQQRSTWVTUTUUTRUUWXYXX[YXWWUTVVVVVWVTRSQSQUTWUV]^YVUUUTSSRSSVdie`mry`RRQQRROSQTTPSSSUWTSSUVZ_]]_][\Z]Y[XYZV[]fbaceefjmopqprrrpopqoopnokhiieffheefcbccedcddcbfdccddca`bbbbaaba__a````^__^]^^_^]a_^^^\]^`]\\\b\b___ba`a__^^_^]\[]\]__]^__^_]^LONLMOMLMNNPONOPQNNLLNOPNOORONOOPOOOMMPPMNROLOPQONOPOMNMNRSQPMORQMPLOKLPQOPPOOOPPQPQOTURQQQOONRRONQNSQPPPPNNNPPRQQPOQPQPPPQRRSUVVUUVWVWVRWWWURRPSSSQPSTSSTUVTRSSSVTVTWVQQSPTPRRRQQRTRSUWXXVQUQSPSURRTSRTURTSTTSSRQRQPQQQRSY`¢ÛÊWVSSSSSSRQOSRWZSSRQPRUYVUUTSSWUTVPRRTQXZUTSRPRPSTQPQSSSTSURTTUUVSVXZW[XXXZVUVUVVWVSTSRSRSQSVZTTT^_`YXURSTTTQ]i`W]c]dbPRSPQQQRSQSRTTWUWURSUTW[YY][Y[^\Z\YVY\X_f`abfcdjlopqsqpooppoqpppnmlljjjgfefgeddbcedcdbbccecccccbbbabaaba_`a````^^^^]_]^]]a_^^^]]^`]\\]a\a^_a`__^_]^_^]\\]^]_^``\`_^`^\MNNMMNLLMNNONNORPQMNLNNNNMLNMNOQOLOOQPSRQPOMMQNQONOONMMMOPQSQNNQOOONOOLMNOPQRNMOPPQPOQRORSRTQOQRPPPPMSSQOONPOQRPNOQPPQOPQPRRQRRTTTUWWWVUUVSTPRTPX\TQPOQOSSTUURSVVUSSSUWZRSQQRQSRPPPTTUXZZYTQSRSRTSSSRRTSRRTSTQSSSRQQPPQPQQMd·ÿëYVSSSRRRQPORRWWRSRQPRTVUUTSSSSUSRPSTSSYRTSRTQPQSQPPRSSTUUUSSSTVTTT[UXTXWY\VSYVXVUUVVUTSRSSQSYVRUS_]^YSTSTPTTce\YZYX\lzw]ORSPSQSQURRTUVUWVWSSTUX[TUYWUTUXY[ZWTV^cdacabachmpqsspoponmprpoonklmllkjgekghfccdbbcbbcdbeccdbd`dacd``a``ab````^]]^^_]^]]`_^]^]]_`]\]_a]a^_`___^_]^`_`]\^^_^^`_`_`a^a_NNNMMMMMNOOONNPQOPMNMNPPMLNNNNOPNMQRROOPNNNMMOPSNOONNNNNNNOQPNPSPQPNRNNOMQPRQNONOPQPNNPPQPQSOOPQPOQPPSUQORRQQRQPPOPQPPNPQQRRSTTWUUXXYWYXUTRQQSTTZ^XSTSQSPSSTU\XTUTSSRTX[USRPPVQRPQPRTTV[\]YVUSSTTRVSSUSTSTSRUSTTSRRRPPQRQPPk¥¯·[RTSSRQRQPORRTTRSRQPSSSUUTRRRRTRQPRQPTZUUSTTNQPQPPQQRTTUTSSSTTUTTUZ\^ZWWY[XV\XYXVVWY^ZSRSRQSWUQTTSWbYVUSTTRXia[WUVUUV[ZVTSRQSQQUPPTRSSUTTWRUW\ZWSTTTTUXZXXURV[befdabbdeklpoppprpomnpopomnmjmmlkkgjjiheeddaddcccdeedddcccbbdda`aaa_baba`__]^__]^]]__^]^]]_`]]]`a^`^__^__^_^___`]\^]]^_a`__ba_`\NNNNMMONNOOONNQPNONONOOPNLNNNOOONNQTQOOLPOOKNPUVOOQQMMNNOPSQMMPQOONNOQQONPPQNQNOONPQNNOPQNMMOPNNPMPQNSRQTVVUTSTROPPQPPQQSQSVTSRVVXYXZYUUSQRQPQSUVXZYURRTSQRTTXURRTSRRTUVTRUQQSRTPPRSSUUVVVXYUTUSRRSSSTQRTSUSTSRTVTSQQRSTQPSuvxrVRTRPPOQRPPRRQQRSRQPRRSTUTQQQRTRQPRPQSXTUSRRSQPRLQRQTTUSSRSQRTUWTTW]_]\YZYVY_[YZWUV[]YSTTSQVZTRSQST^VUSSTTV[jYZVTVTWTTTSTSRRRRTRRQTOSWRUUVRU[]XUVVTTUVWVYVTU^egfgeeddchghkoosrspooprqpolnnlnpnknghijihhcfbedcabbbcdcbcc`adcadb_`b_aba`_^_^__^]^]^__^]^]]_`]]^``^`^__^`_^_^___`]\^]]^^`_^`b`^__OOPPNMOPOPPONMROMNOOOOOPPMNNNNOONMPOOMNOOONLOSQSLMQQQOONOPVUPNOONNPRQQPNPNOSOPNONNOPTPOOQQONOONNPPPSQPOONORSTRVTRNPPNPSRQPSUSQTSTYVVUUSUSRSSQRPQUY[\XTUUUTWSTQPRPRRUSVUTSRUVTQQRPSPTSSURTVVWVTTSSRTRSTRSRUUTTTTSSSSRSRSUQRTVTUWZVQPOPNNQPPPUSQRTSRQQQQRTUTPPPQSRPPQPSSVSUSSRSQQSNOPRUTSY]VVSTSWVTTVZ][XYYX[Z]\WYTUVYXRSURSTYVRRSUW\YSVWWUXVhbTTYVTSVRSSTVTRSSQQUTSURURURSTQSZ\STVWVWWTTTSTV]cfggeeeedfecfgkspurrsossooomlmlkmnmllhijhiiggfgdcbacbdcbaaccacbb_a^`aa``b^`]__`a_^^__^^^^^^]``^]__`__^^^_`_^__`__`]]^]]^^__^``^]^^PQSQOLNPPQPONNQQMNPPQNOPRNNNNNOOOMONNMNOOMMMNRQPOLNRQRQPNNSSSROPPNOOOQSSQOMPQQNPMPLOOPOOPPPPNOOPQQQQQPOPOPNSRPQSRUOONPQPPPPQRSRTVTSSSSRTRRRQRQTTTUVZ]\TRXYZUQRSQRRSQUTSSSRTSPPQPPSRSRSSSRSSSSTTSVTTSTTSSRUTSTTTRUPURUSUTQRRROSSUUSRPPPQPOOORQOTUXQRPPQQTVTOPOQSRPPQQSRURUTSRSRRTPQQRTSSXXXTRWWVUUUUY[YWXWVWW\]XVQSVTTRRUSSRTURTW^_[\ZZYZZZ_k]STSQSRSQVUSVVTTSRQQSTTSTSRRUSRVXVSTVVVVVROSSRZdijfedeffhhdcffhorrtswsssqppmlkkjjmmljihijhhjhhdedccadccd```abaa``_^aaaaac____aa]_]^]```_]^]\^_^_a_``_^^^_`_^__`__`]]^]]^^__^__]]^^PQSPNMNOPQPOONOONPPPQQPQTOOOMNOOOLNNMNNOOLLMNQQPNLNPPQQNMNQOQPQPQOONOONOOMMOOOMQOONRONPOOPQONPOSSPQSQQQOPOQRSPQQPQPOOOONNPOQQQRSRSTTTTSSSQQQSSXQTOU[\WTUWXZVRRTRSSSUSSTRRUUPPQTSQRRSQQQRQTSQRWRVRVSSTTUUTSTUUUSSTQTSURWRPQOPQRW[VTSPQQQPPQOQQPRSTRWPPRRUWUUSRQSRPQQSRRSQUTRRTRSURSSRTSSWWUTRVVVUUVXW[ZZYWWXWWYXTRRSRTTRURVWWXRY^^\Z[]]^]^]dla^XUPRSSRVWSSUTTTSTRQSSTUSSRSSTWXUUVUUUVRRSSSR_iihhhhhhghgfddcelqtttusurtrpmpnkiklmpoljikhfiifffefcdeddda`acaaba`aaaa``bb_]^`b_`]]^\^^a_^_]\^^__c^]_____`a`_```__`]]^]]^^^^]^^\]^^PPNLNMOOQPRQQNOPONOORVRS[XOLOPOPPLNNNNNOOKLNNPRQNMNQPQQONNOOKNNPOQONOMMMKLOONNMNNPROQPRQNPNNOTSVQMPPROQOMPQPQQPPOQRPQMMOOPPPOQRRTSTSRRQQRSRRRSSPTRUUUUSSTTUQSQSTTSRSSTTRTURPRQVUSTSRRQQQQSRQRWWOSRSPSTUUTUUUUSRQSTSSSTVUORPRUUY[UTSTSRVTQPOPPPRSTRSPPSRV[Y][WVWUWRQRSRRQUUQRTSTVTTSSSRSVVSTRUVVUUUWVZYYYZ]YUXZVUSPQSTURTRUSWWX^[[d[Z\]_frmggddca[WVSSXYTTPSQPSRQRTSUSQRTTSTYYVUVSURTSQSSSVciliiihhefgfhd`agnqsuuvtutsqqomoniljonomljiighihifggedeeecdadcabb`__aaaa``ba^^`a`^a_^^^a_```]\^__``^^_```_`^a_``````^^^^^^^]^]]]\]^]OOMQKNNQQPRPONPNPPOQPRSSWTPQOMONMLNNOOOOOJNNNORRNMORQQQPOOOOLNOQRTNPJMLKIMNOLMNNNORVXXUTNRPPNWXRMQMNRNPPNOTQQRPOPSQRQMQNQOOOPRQOSUSRQRSSRRSSSTQPTTVVXRSQTSRSQQSTTSSTRSTSUTTRQQSQUTWROQRQPQQRSUURRQPQRSUSSVTUTSTSSTTSTVTSRSUVYU[UVTUTUWXWQPPOOPSSTTRSTTTUWTYWU\ZZZVTQQQQRSURSUTUWVUTSSRSUTSTRUUVUVUVVYXYYZ\YUWXWWSTYXWVTTRSTZY]]VU^ZWUV^kpcc]V_kic[SSSSTTUSRRRRRQSSWUQPRSSUXYVVVSVTVSQTQS]dlggb]acdcdfea_frnptuwsuvrrrrnrnnklknpmlljiihikkifefhjfeededaebab\a_baa`_`aa`^`aa_`]]]^_`_`_]]]a`a`_``___^_^`^__^^```^_^^^^]^]\\\]^]NMPPPMNPPOPSNMPNQQOPOPRUTUVTRNOLOMNOPMNNQOLNOOSSNNPSRQQQPPPPMOPRSRMOJLKJJNNMPOOONQWeidc^UROPNVWPONPMPNPORNSUTRONOOPQPPOPRQRPRRRQPNSTTRSRSRRSRSTSVYWTSUUTRRTQSTSTSTSTTSSTTRSQPRQSQTSRQSRPQRRSTTRQTSSQSTTTTUVVUTRTUTTUTUTUWVWVUXYUWTTVWSXVTQRPQQRRSURQTUXWUTVSUYTTYSWURSTQRVSRSUWXYVTTSRSTSSTRTUVUUUVVXXXY[[YVVWVTSSWWUUUUTSTW\_^TVRURRRWWZjhaXUY^cqjWSSRQRRQRRQPPQQSTSRSRSSVWYWVVWZYTRRRV^egcg\WSUYZ_bfc`akrootwwuwspsqrorlmiklplnmlkjhggiljffggfgfeddeddcbb`a``__``ab_`_a`___^]_``^`a]_[a^_b`_ab_^_^_^\_^__^_^^``__^]]\\\]]]^]OPRRNNOPNMMOONPMPPQOORPRTTUVTNOPNLPLNLNNNOKPLNUSQNQTSQRSQPPPNOQSSPMNKLKJKNNMOOOOPSepjnyr^PNPTVQOMPOQNNMPMRPTUQQNRRPPQQPOPPPQQQQPSPRSRTTUTRQRTURUY[XUSTVUUQRVSTRSTSSSSSSSRRQOQRQQQSSQSSSRSRSSSQRQRSQQSUSRTUUUTWUWWVUVUUTXYWWWUVXTVWTSVUYVXVVSQPQQSVTUWVXWVTVUTVTVVRUTTTRTRURRQRXZVUTURRRTSTTSTUVVUUUVWWXYZZYVVVURSSVVTTTXYWWZ]^_XRRSSTRYScib_VVTVXei]VRRPOQPPRPPROSSPRTSQSRSYdaWWZ]XSRTYbhicf`UTRRTRT]`b_akkintvxvvvpoprtrnnnknrronohjhhhhiiehggfeffdbbdbccdbaac^]`a^_`_^`a`_^^_^^a_\_[^^`^_````b`a^]^__^^^]_^`][`^_\[]\]][][Z[PPNNNNNNONNOPNONONONMQMPSQSURNMMOOLKMMOMMONOKNQOQQSVVTSTQSQQPPRTQNLMKKKKLNOMOOPPPUhuqnsx\QQPRSOOPPRMQQNNPMQRRRROPOPPQQRPNOPQPOOPRSQRQQUTSTSSQQQQTXYTRTVXVRRRQRSRURSRQRUSRRQOORQQTTQRRTSRTUPSRQRRQRSTUUTTVTTUUVT[ZVWWZVVVXVVVY\[XUVUUWUVWVWRUPNOPQSXUVVZXUUUTTVTTWSTRUYXVVVRSQQYWSSRRSSTSSSSRTSUVUUUVWWXYYYYWUUSRSRTUSSS[_\[^^_`YTUWYVSUVdhY[UVUTT^hdZRRQRROPRRPQQUTUSQTORTSXWZXZY\XVVXbhiif_SQRPRUQTY\b`emnlpsuwvsqpppsrrlolloqqrmlljiiihggcfhghfehdcedcacfac_a_]b`a^`__^__`___]]_]\[\^_a^a`_``bb^_^\^^^^_^__]]a_^^]]]Z\^Z\ZWYNNONLNNMNNOPONNOPMPMKONQMNSROPNPNNNMNNNPMMNOOSUMQTTPUVRNOSQPOPOQPMLLLKKLMNOMNOPPQXlzyosrZRQPQPOOPOPOPRPQQPOQQQPPNOONTTQOPQOQPOOOQQQRSRVRTUSRSRQRQSTTTSTVUVUSTUSRSRRRUSTSNRPQRPSRSSROQTRQQRSQPPSSRRSTTRUTUUSUUUWWXVWWSWUVYYVZY[YVUTTUVUVUVWWQPOPSTV[USUWUSWXUTWWWVTRRSUURSUQUSRY[URTTUSQRRRQSUSRUVVUXUUXZZXYXUTRRSRSTRRV_da_b_`a[VY\_\WWXbdXVUTPSTUa]YSSORPPRQQRRTVTVURTPTTVXWSVWYZTTT`fhjibXRTQQRRVQ]^dcclgjosuwtsrqpsvsrqpnnnprnomlkjhjgihhgggfeefecdbaadfcccb^ab`_^_`^]]___]^^^\[[Z\_a^]_`^a_ba``^]^^_^`_]]_^^`^]]^^^]]\YZWYNNNMLNNNONPONPOQRQNLLOOMNPOQPROPONPPNNOLNOORUUQNRSROTQRMOPOUSOOONNNOOKLNNOPNNOQQRZpoqlYSQPPOOOOOOOPRPORPOPOPNNOOONTSQQPQRQPRROOQRQQQUSSURSQQRRRTWXWVVSTWUSRRQQRSSRRSRRORRPROTSTTPQSSQRRRSRPRUTVUTQURTSVUSTUVTWXYXVWXXXZ[VWXXWTVUVWWYXUVVVPNPQVWVWVSUWTSUWTTWUTVTTQRRSRQPRTUTV[TRTSRSSSSRTSQTTUWWWSSVXZYYVUSSSRSRRSQRZbjfcf`ab]X\`eb[YZ``WVTSPSTUUUSTSQRPQRSQPTWTRTRQQRQUYXTT[YXXTTVbhijdYSRTQRTSQT\dffgcdhmrsvssqptxvrpppopqqprlonmlhhfjkgggfeehfeedb`_cdbdea_aa___^_^^a^\_]^_]^\[[]__^]__^_`a^_^^_`^]\^__`]_`_]^^]]\][\[YYWPNQNOOMMPOMNOQOQSPNMPPMOMPMPOSPRLPOPNMPPMNPUURONPPNOPOQRSMOPVQMNNMPQNMLMNNNNOOPPS]tpkfXTQPONOPOOOOPQPORPPPOONOPNPPPOQPNRRRRSPQRRSRRTTSTTQQRRQTRUWXXVVVVXTTSQPQQRQPOSRRRSRUSRSTQWSTQRQRSRRQPRVWVWUQVSSVURTUSTUUVZZWXXXWXYXUV[YXVUTXXVUTSUUNOSSUTSWZUVYTTUWRVWTTVUTSQQUSRPTSTSTXSTQSUSRSQRPTSQTWZYTTTWYZXWWTRRRSQQSQRTWfpkgjabc_Z`ekf`[\^\WUSSQTUUUTRSRQQPQSRPRPTSSQRTQRUVUUTU^\VURS^hfkg[VSRTRSSRTU`hgffa`llqrvqsnswwvsrporqqrqoooolmiihhhgffedggeggddbaacddda`aab`__]_`^\_`\\_[]^[[_^]]^^^^^ab^^]^_`_a^^^a`b^^__^^_^]][ZXYY]OPMQPPPNQOPOPNOPPPNNQPOQQNPQNPPPNQONPQOMPSUWTPQONNMOOQPPSNPNMPMNNNNPPLKNMMOONNOOR[kwwj_`WUQQNNOQNOOOPQQPRQQQPONOONPPPRSPNPQRRRTRSVRRRSTRRTRQSQSRRTVPRS^W[YUUSOQQRRPPQQRSSSUVVUSUTVTPSQRRQRNRRRRSUUTRRRTVVSSUTTRWXXYXWXXYXXXWY]XXWTTXSSQRQQSTUUTUWUVYSWZUVTSRWYQVWSUTPQSRRSUTSUWWRTRTRTTTPSQQSSS^^UQRRTWZXVTQRPRSSPRRSTSgmongb^ea]djrkd]^\XVTSRRTUUUSRRRQQPQRRPRPSSTPSRTWUTSSUTXYVUPT^hih_XTTRTRSTRUXafcca^eikstvsusvvwwtsrqsqqqqooppnmjjjjeiggdhfffhgdcb`bedbdcba`_`^`_`a_]^^]]`[a[[\]]^^^`^^_`b_]___`^\^]_b^``_a^\\^^^_]ZY[[\OONOQOQNOOOPLOPOONNPQPPSOOROONONOQNQRRUXZVRPNROOONMMPQNNOPQOPNNLOOOPLLLOONNMOONOUZanvkecRQPPOMORNPOOOPQQRRRQPOOOOOPPPRRPNOOOPPOSRVORSSWTRUTRRQRRSQQRSSWYZYVXTRQQQRPQQRSTTSTWVTSTSTTUSRURURQTRTRSRRSSSTSTSTSTVVUR[\[ZZVZZZ\ZUWXWTUWWXWUPSPQRTTUUVVW\ZUY[TTVUSVVRUWRQRRRTWWVVVXXUTTRTQRSQRRSSTQT__ZRQTSSVXWSSPSRQSQOSSQTSgsrggichaZ_epsi``[UVTRRSUVUTSRRRQPPRRRPRPRRSPTTUWUSTTRUVTTSSXbifaYTUQUTRSSVSV]bcc^_bdirusrvwwvywwtrosoqopqpopomkklifhjfhgfeffffgebdfbcddbca`aaa`b_\]^_^^_`]\^Z]^[\^a^^]___`a`__]^_]_`a__a`]]__]_\\[Z[[]MMNPOPQNPPPNQROMONPPRONPPOQOOPQOPWSUSVRORNPONQOONONLMONMOOOMNMNMONOLOMNPNPNNNQNOPT`jne]UROOPONQPPNOPQPRRRSSRQOOOOOPPPRRPNOOOOONQPOOTPVVUR[_WSQQSSRSTSVYWUXRVRRRRPTPRUTSSSVTUVUTQRTUVTVUSSVSURUQRRTRTSRSTUUTTVVTTY^\XZZ]Y[YYUWYWVWUWVXWRRTSTSUTTVVVXXXZ[VTVUUYWRVXXRRUUVVTYZXXURTTSSRTURSSRURTY`VTQPRUUUVWTQQRQQQOSRRSST[efilmhongflnh]YVSUWURRTVWVTRRQRQPQRRRQRPQRSPUVVWUSTTRTUSRRSZegaYURQRRTPSRTUWbfgf`aaciqvusxxyvyuwsqrpnrpqqppqqmjjkhgghijihfehggfffddeacdddbbbbbaa`]`_]]_]^\\[]]]_[__`]^]^`ba`_a_]^____^^a`^a__^_[[[Z\^]QMOMOOPOPMRVUQONMQRQRLNMQRURRUSQVXRSNNONNNONNPLQNNNMNNMNNNMNOMNNNMMNMLOQNMMNOQPLRWgneWPQPPMPOPOOOPOOQPTPSUTURPPOOPPPPRQPNOOOOONPONOSRZ][]cj^VRQQSSTTTVWUTUVPRPRQQSQQRRQSRWUTSUSRSTUUVVTUTYYWRTTSUTRSRRSTVTUTUTUUUYZWWZYYZXZXW[VVUUXVZXQSUSSTUUTTUTYWUWVUUUZhm]U\YUWSUSWWTW[VVVTSSSSRRRSRQSSTWZYQSRRQUWUUYXQQRPQRQQSRSSWYfdckkernnrmh]VTTTTVTSQRVYURRRQRQPQRRRQRPQRRQVYXXUTUTRTTSRRSZcc]XTSTRTSQSRTRbedeba^^ckswwvwyywyxvspssprtqpqropnmllhhhhhfghefhegihhefebddddccaa`a``_^]]__]^^Y\^\]`]\_^]`]_^`b_``^^__^^_``a_]``_\^ZZ\\[\[PMQPPOPTPPWYTPONPPRNQMNPQSVWYYYRSTOONOPLNPNMONLQMONOLPNMMNMNNRPNOONQONMOMMONNNONPS]b\QNQRPNONOOMPNOOQMPNTUUXTQPNNQRPQRQPOOOONNNONOPSU^dbhovjbZYXVTPSWZXTRTTSSQUSSSQSRRQTRWTYUVRRTTSTWVUTWa`VRUUVTVSSSUTWXTUUUTWTSWYYYXYYZXX[ZZYUWWVTVWRVUTVVTUUTUW[VU[^WWX]gj\SVTTUSTTWYTWZVTURVRSSRSSSRRTTV[^UOQRQRRVTUVYSPRQQQRRSTUVWY`_abgknrqrthbTSRQSSSTSQUWURRRRRROPRRRRRPQRRQW[YXTUVTSSSRRRSZa_ZUSRSRSSSSUTYbc___aaaeotxxzzzyxyxywtttqtqsqmqopoomnliihefhffgghjgjifgfbgdeddcbdaa`a`^^^^^^`\\\_^^_^^^^__^^^_^_a`_^]^^__``]^]^_^_^[]]]][]RSPMOQRVPSWRPNPONOQPPMRTXTUVVQRPUQOONOOMPROMOMLQNMPMKLPNMMMOPOOOPOOMOPMOMOLPQNONOPSWSPPRQPNONONMPPPOPOQQTTVYSMPPPQSRRRRPONPONNNNNOQSWbkmuvocb`[VRSVXVSPRQRUTUUTSUTTTSSUTSVTSRRTSUTUVVUWYWRSUTTVTUURSSUUUTUUSUSRSTUUSUVUTTVW]UTVVUTVVVVTTUVUUWWV\\WWg}oXYTTWUSVVTUTQSUVRTWTRVTURRSTSUTSTTXYTRRRQRQRRTRUTZWRTPRQPRTUUXWYadaahqmslkpmjYORQSSTSUTTZZSTUTRQQQTQQRRPPRRRX^[WSVWTSSRRRRS[_\WSSRSRSSSTXY^fea]beddkrt{y}zzy{zyywuvtrtssrrqrpoonqmjjhggdffghhighifffcbecbdcbdb]aa`_]`__^\[\]_^\]___^`^^_]__]_a_]_^`a_]^^^_^___\Y^\]^\]TSQRNOQSQRQPQTOQOOMNOTVVUPQOPOTQSTOOOONPNPOOOPOLNMNMLNPONPOLRNNNONNNOOOONPOQSQNNOQQQQQPPNMNNOQONOOQQPNSPTUUXROQQQPUVWUTTROOOOONNNPRSZfr{{kjbYYTSVWTQPRRSUTUTSSUUTTUTTTRWTQSPSSSVTVVTUUUTTTUURTVTSTWTQSQPTRTRORPQOQRRSSTUVXT[`ZVUVTTWXUTSSRTTW\\goxnUVRRWSRVRRUSRQTRSUVTSQRQSSTSSTSTTUZYTOPSQSVSTTSUXVZTUPRPPRPSTVTW[`gfkonpgaglj_TVRQRSVTUUZXTTSRSRSQQSNTOROQSRW_\TSWXUTSRRRRS[]YURSRRRSSRV[^djgcaegghlrvzzzx|{{zzxwvvvuwvurttrqorqpnlligiffegghhgiggggacedddcbbc_a_``^^``]\^^]^_\[]]]`_^^]_^[b__`]`__`_^]]]^^`a^ZY\]`[\^TUVSQNRQPOONTSSNOPOOQVXTNOROMOQPQSNMONONONMOOMMMOPMNLMOONQQPOPNMNMLLOOQNMOPQRPNNOOOPQPRPPPPOPROOORRRQPPRSVVUQOSRQSVWVTVVTQOOPPOONOPTgztj`][VSVURQQRTUVUUTRSTTSSSSPTVTSTSOSRWSUUUVUVUSTUUTTTTTTTTTQPRPRPRRPRQRORPRQRUTWYV`g]VUVUUYXVSPRUSUV[]^^acYTVSSURSTSTPVQQTRUXWQTUTRRTRSTTTSUUVRPQSUSRRRSUUX`\SXVSSQQRNTTUSUUZhgfhlqichefaUQRSRTRTSUWTRRSTRRSQOQQQPQOPTSZYUUSYXTRTRRRRT\[WSRSRRRSRSX^cimidfijjmnswyzzy|{{|zyzwyxxwuuususqqtqnlmkgfgegeggggihghgeffffedccdb````^]__]_]]]]__]]`_\_^\]^^_^a`^`^_`]a`__]]]]]^][[]^_^[\SXWQPPOPPPOOVRPRTQSTUZUQONRQMNPRSPPONNOOONONNONONNONNNMOOOPPNPNOPMOPMMPNNNNOOOONONNPOPNPPRNRRRPNQQRQOPPQSVWTSRRSRVXXWVTVUPPNMOPOOPPT`q ­³¶d^a^XSVTRQQRUVVUUTRSTSRSRRQTUSQQQRQTRSTUUTSRTTTTTSSRTVSTSRTRTRRPQSRQRPQOOQRRTRX[X`g^VVWTYVUVVQQURWW[XSUVSTVUTUTRTUTQRUSSUUR^ZTRSRTSRRTTTSVTSQQPPQTRSUTVUUWWSQTUVURQSOTRUSV[hmc`bgngaeccb[USTSQRPTTXWTTRRSRSQPQRQQQQQQVWQUXXVSVRQRQRRVZXPRRSRRSRRTZahoojhjlmnpptwyz{{|{{{zyywxyzuwuuvvuqprqonmjhiifgeffifgghfgfdcfgebcedcbc`^_^`^^`]][`]\\_^_``_^^^_^]`]^_``]`aa``^[[^\ZYXY[[\[[^SUSSTSSPPQONQSTWVQTPPQRPNNOPMNOQRRQMNOMNOPOLOPQOQOONMNOONOOPNNOQONLMNOOONPNOMNOOOPRPNOONPPMQQQNOMNSROROQPRVTTSTTUZ[YUTVVWPOROROQPSQQXj¢½Íµvjegg_VTURQRRWXWVUSRSSRRRRRRTTRPPPQRSSSTVUTUTURUVVSUVUTUUTUVSTSTSRQRPRQQOPPRQTSY[UY\XXYWVVTUUVRTTTVTXXQWWWTVTSVVSSUSSVWUTUTTWXTRTSSRQQRRTSTUQQRSQOPQQWRSUSSTUTSTUVTSQTSQTU]lie__bgmgfic`b]XUTRSOTRUWXWWSSTRSPQQSRRQQROWYTW\ZVRTQPQSORY]VRRSRQSSRRV\enuplmoppqrqtxyz{||{{{zzywxyyuwuuvutrrusnmmllkhjigfgffgiheegdegfeccdbbcca_]_`^^_Z\^_]_]^\^__^__^^_^_^````aa]a_`_a]][WYXZ[\]\[\QUUUXURQQTSQVYTTSQPNMOONNNOOMNMPPRQNONMPPMNNMOORQMPMNOORPPOOPOOOLMNNMOONONPMQOPMNNQSONOQNSMPOQPQNRPPNRPPPRTRPQSTX\XTTVUVUQROQORTSRQTVfxÁÏ©rtjdid\ZRUTRSQTXWWURRSSRQRQQSTSROOPQSSTTUUUTTTURUXZXVTTSUSRSUUTTTPSPQQRSRRSSSRTSY^WWVSUTSRTUUTRRTUTSS\WSWVZTXTQVUTTVVVTUUUUUTWTURUSSTQQRQRTQSQPQPQPQQQUSTSSSSSTRTTUWSTWPSZcnggY_e^bmglj``ca^XSSRQQSWWUWWSTUTPQQQPQRQPSTW[VX\YUYXRSRRSSZ\STRQSRSSSU[fpvphnrttsutsuxyz|||{{{zzyxxyyvwvuvutrrtsnmnomkhgkighkjkhdhfefcffcddccddca^]\_`^]Z[_a^^`\^__^a`^\_^]^]^_]a_^^`^]`^]^[XXXX\[\\^_VWYZ[\TUY\YVURPRSSPMMNNNNPONNONONPMNONMOPOONMONPPPPNNONNMMPMNONONOONOPPPONOPPPOONOQRQOOMOQQQPQRQPQONPQOQPQQQQRVUVXUTRSXXSTRONPQUVSQQW]f¸¸ze[Z[]\YXXXSVQRTVWTSRSTPQRQQTTRQNOPPTTUTVUUTTTUSVWXVVTTTTTUVVUSUSRQQRRRSSPRRSRSQZhW[XTTTVRTTRSTVVRQTV[VWW[WUXUQTTUUURTVRVUSTTSRTTTTRSSSQRQQRRRPOQSRTTRSUUUTTTUTUSUVVUUTR^jj]`mR]dc`eehgk`YY\XUTQOQRTTSUVSVTSPSQQRQQQRSVTUWXZYX]ZUQQSSX^TRVRQPTSUUXcpungkruuttuyuvyy{}||{{{z{zxxyyvxwvwuusrssonoomjhgjihijgjfegffefbfbeefddcb`_]^`^^\\]^^_^_^^\]`]a`^^]]^^]]]_`^^^_`]`^]XYWYXZ\Z]\_RT[foqjog_UPSRRRRRQOMONNOQONPOOMMPMQRPNPPMPOMOOMNOMOOMOQQNSLOOOMMMNNPOOPQNQNPQONQOPOPNOPRQQQPQRSRPOPNOQQRRPRQSWVVUTURSVVUTTSQRQTXURTUYebYWWWWXZYUVVQQRTVTSSRSRSSQSURQQMOPPUUVUUUUTTUVTWVWUVTTTTTUUUUUVRTQQVTRTTRPRQQQPZZY[YUUTUTSRQPUWWTRUY\YZZZVUYRTYSSSPQTTSUSSUSSTTTSTTVTRQQPQRQURSQSURUUSUWUSTVVTTUWVTUW[bgdZY\XSX^bfpnjluaUX]WRSSRRSSSTRRTUSSTSQSQSQTSUUTTWXY[\ZVTRRUWYZQSSSRRTSVW`nwnehruuurtuwvtzwwz{||{{{|zxxyywxwvwvusssspooomjihjihhhgifediefceabeeefecaa^\]`^[\]]^^a__`]^]``_a_^\_^^^]_``_^^_]]^^]Z[W\V^][^^_ORa{{{fYRPOPROPSONNLMMNONQOPOOMOOMSRPPNNMNNNONMOPPOOQRPTQMMOPMONMNNOQPPPPOPPQPSOQMNNNPUSPOORSRQOQPOQPQSTSQQSRSUUTTRSVUUVUSRQRTWWUWWY`m~y_ZWWVV\[WUTTRRRSTNRPQTSRTPRRSRQOOPSUVWVUUUTTUVUVUVUVTTTUUVUUUUURSQQUSRRQSQPQPPQUSSYUVUUSTSRRQSSTUUVW[][ZYVVZVTTRQSRRSTQURTPTSUWVUTUTSSQQRRRTSUVQRTRVRRSSUURUUTVTSUSYadhZUWYWVUUW]`ccade\V[\ZRSSSRSSSRRSUVTUZXSSRRQSTX[WUZWY\_ZTSRRSWYVSRQTRRTTW^lrlddmvwttvssuvuztw{{{z{{|{zyxyyxywvwvvtssspopomjjijihhgghfedhefceddecebcd```^a`\Z[]]]_____^_^]`__]`]_\[_^^_`]_^^_^a]Z[YZXZZ[]`]`PUimXRPPQOQPOTQORPOMKNOPNPOPMOMMOPPRNMPOONQNKOPOPPPQOQOMLNONOMMMQONROQQQPNOPNMOPNNNMRQSPPOPQPPQPQRQPQQSVXOSQTUSSUUUTTXUSTSSTTVTVVWZ^apj[ZVUUV\[RRSRRRQRRPQRRSQQRRQQUSPRTSTUUVUUVUUVVWVUTUUVTTUUUUTTUUTSRQQTRSRQSQPQQRSUVTUUUTVRWVUUSSRTYWXXXW\]\WVXTRRRSTRQSQUURUSWVUSUTTRSUTQRSRRSTUXRSQYUVRSTTTVTUVVTSQWde]VUUWUVUSUSVV[a]ZYY\`Z\SSSRVRSTRQOQTWZYUSRRQQQUX[XWXV\a`ZRSRRSWWSRSSSRTTV^jrobfiqwvusstrsuvuvxyzyzz}{z{yxyyxvuwxwwutssqppomkkjjihggghfeehffdfedecebcd`]a__a]]\\^_``__^_^]^_]]aab]^]a^`^]_`_^_`\YXYYXWYYX\`]`QVeyz}t_RPQORRRUMSRVQQPPMNNNPPNOMMNMNOPQNNPRNMMOQONOPPPOOPPOONOOQONORQOPNOPQOMONOMOPOOMMNOQRPQQRPPQPQQSRQQSTUUSSTUVWPUQRUUWTWVVUUTTUVUWWZhg\XTZ]\_\RPQPPPQRQPRRRRPSQRQQUSTTTTWUTUSUVUTVWWVTTVWVTTVVVUTTUTSSRRQSQTRRSQPQQRSUUTUTTUUVVXVTWUVWWXXWVXUX\ZYUTTSSSSSRRTSTSVUVSSRSTRTSSSSTROQTUWYTRT^YUTRSSSTTUVSSR\caYSTSRTSUSSTTUTZ_aa^fnk\[VSRTRQSRRRTSTUWWUSUURPQTX[YVWW[_aWSRSSSVURSSRRUSUTfsof`gltwuqrqroprsruxxxyv{yyz{yz{uxxvwxwvutvtrqppmllkjjhggggfeehgfefededeccd`^a__`]]^\]^^`___]]^]\_]]__`_^`^__^``^_]^^YXYXXWWY]^_]_SWfrqkg^UPNPMPQSNOQMOQQONNMMPONNONNNPOONOLONOMMMNOPNRTRQONPQONNPOONOQOQQNOPOMNOOMNQQONPOOPPQONPPQPQOSRQRPQUUUSQQRSUUSSPTUTVUUUTTUUVVWWVVYf}wfYUT\hi]WPTQPROQPPQQRRQPUURQSSSTRSTUUSTSVTUUVUUVUUUVUUTUUTTTTUTRTSRQRRURRSQPQRRSUUTUUUVUVVWTRVTXZ[ZYWXSXYYZ\YWUTTSSRTTRSTSTRUTTTTRSRRTRSUQOSTRUXTPPZVSTQUSUVSTSQVbe\UTTSRSSSTTUTUST[elphgphZ[\RSSURWQSRPRPSTWYTUUQOQTVXYVU\Z^XURTRRSXSRRQQQRTU^mpjaeimvuurlkomoosruvxyyxxyzyxyzywyzxuvxtutssqqpoonmljkigggffefhgfegfeeeeccd`_a__`]^^\]^^___``^\\\^]`_]`^_^^^____\]]^[YYXZZYX[]__^^W[jg_ZXYTONOOMMQQOLROPPNPMNNONPOONOPPOMOPOLNPMNOMPMNSWTRQPQQQRRPPPONPPQRPNMONOPNMOQOMOPNOPQPQSSSQPOPQROQSQSPTQPPPQQTUVRWVWZXZUTVTSWY^`YUTX^aZTTTY_`ZSPQOQPRQOQPQPRSVXTPRTUUUUUTVVUTSWVVUVUXVUUSSTTSTUTTUTWTSTUSRQTVRRSQPQRRSUTUVUWXVWVVSRUUXYZ[\[YVVXWVUW[ZTTTTRSUSSTTSRUSSTSRTUQRPRTRQUTSUVTRRTVSSTTTSTRRRZf_XRRTRRRSRRSTVVTUV]egqphqi_Z`WVQRVWVUQSPQRRTYWUURPRUVXYUX_\Y]VXSPQSWTRSRQSRSXenkdchnovtvokmlnporqvxwwxyywwxwxz{xxvwwxwvwsqsooooonolkjhhhhffeghgffgfeeeedcdb`a```^^^\]^^_____^\\]\\]__`___^^`\a^[^][[YXX]^_[[\^^^`Ydmea[WVSPNOPPPORRQLQNPNOONMPNURORQQPPNNNNNNPMNNNPNMQSPPTQMRWUWROPNNNOPNONLQOPMPLQPPMNONSQRQPRSQNNSSTRQRSQSQOONPRQSTTQQY]]V[WZZZYTWX[`\UTUSTTSUUVW^\ZWQPNRQOMROQQQVXXUSRSUUXXVUUUVTSWVVVWVVVVTTSRTVTTWUSVTTTTURSQSTSPSRQRRRSUTUVVYXWWVUSSTWYYYZZYVUVWWUSUR^XURSRRRUTSTTSRRPRSSQTUSQUSRQRRSVWTRSTUUUUTTUUTV`e]TOSQRRQRTSSRVXYYZ^a^^jmiijh`Z^SQSZXTURTSRPRSW\XRSSSTWXVUW[[`de^QQPVRTPTRRRTT`ikhcbhlqusrliklpqporuuvuvwywwxwwxxxvuxxvxwvtqrpommmlkkliihiifgghgffghffeeedcddaa```^^^]^^^___^^^\]^]\]^____`___^]]Z]^^XYX[]a]]Z\]^_\^mmdc\WTPONOPOPPQTROMQPOOMONPRVROQPQOQONNLOQOMNOONNMOPNONPNPVUVQRSNONMOOONNOOMQONRNOOPSRSSURPOQNMRWWWTOQQQOOONPOWQTUURUZg`ZZ`_^f^WWVWX^USQQSRTTVXX^[[[USVVSRORQQPRSTSTRSVWXXYYXXVXRUVVUVUTWVSTUUUTTTTWUTVUSTTSRPSSTSPTQRSRTWUTVWX[YXXVTTTVXYXYZYWTTVWWUXYV^\^ZWTSVRUQSTUUSSTSTSTQRRVSPSRTRVYTSSSTVUTUTUX]dbYTQRORRPRRSVRSW[VXhlhb`ikmqmldZ^UTSUUURTTTSQRRVYYVUTRTUWVUVY\_cc\SQSXSPTSQSRSWfjicadhmstqqlijinpoqovsvuvuwvuwvtuwwvwxywuttwronoomlkkkkjhijihhggffegffeeffedefca```^^^]^^^___^]_]]_^\^^_____^^^]\[Z[[[XZZ]^_^`Z\\^[]fvlbe]VQPOOPPOQQQRQONPPPNNOPVTURMQPRNOPONPQPPNOOOONNNONOROOMQWRNRROONMONNONMOPNOOPNUVUTSQUTPQQROPSUROPOPQPOOPPPPVWUSVUWXdXY]rkec`YXVVXWVSVRRRTSUVZ`_^]URSWVWUSSQOSOTQSSUVVXYYXXXWWSWXVVWUTWWTTTUSWUVUVUUVUUVTRQPRSRTPPQRTRVXWVVWXYYYYVTVUWZZXXYXUSSVVWU^]Z^`gc]Z[YWVUTSRUTRSTTSRTUTTTQQQSSX\WSQVTY[[UVZdc]VRSPRQPQQRVQSRSUYVTpjcecgkproh]X[VRSSVX]^\_\YUTUTWWVTRSTTTUZZ\`bd[SRRTURSSSQTT\khfbdhglutqnjhiilnmoosrstttvusuvvvvvwwwutuuvvsqronkklkmikhhjggfgfghhgfhdeegcddedbca`_^_^^^^___]^_]^`_]^^_____^^]\[[[[\\\\\]_`\_][^^]\X`_ag^VOQPOQPNRQQQPOOPPONNOPTUVQPNOOOOPKSNPOMQPOOPOOOOPPOOPNMVOQMPNOMMMOMMNMMOPOOOPVWTTQPSSNURRROQSRNNNPOOQPNQRTYUSTWWWY^`mdwzdW\XXWWWYWTQTTQTRWUVaffZRRRVXWVVSQPRQVRVUTTTUWVWWUTUUUXXVWVWWWUVRUXUVTWWVTUUWWURQQQPRSQQQNSTX[X]XVUVZYYUTUWX\[XXXWSSTTUUWca^^dpmcaUURTSSRRUURSUTRQTUSSTSSQRUWZWRQRTX\\Z]f`XTTRQQOPQPRTSTTTSS]ZZifqliejqpmaUU\YTRSZb`\Z^bc\USUUUWWVSTSQV__[_`c]QSTSWRSTRRTWdkhdbdhjotstnjhhklmmnnpsrssuvvrttwvvvvvvuwutuutqnommkmlkjjjgieggehgfggffffedecdfcc`aa_^___^^___]]^^_``a_^^__`^^^_\][[[[[YZ\]^_\_][[\`aTVX^b_WVXRPRPNSPOOOOPPONNOOPRSRPONPOONMPRQMPMSNNPPPPPNOOPOQMLONMPNNOMNOPONMMNNOONOQTROPPPPPORRRRNRPPQNPPOPQONPSVVUUWTVX\ehvtnv^WSTSVXYZXURRQRRSVVV]hcTTSTWWVWXVTQSTTTTTVVRRTWURSRSWVVUUVUXXVTUTUVTUWYUVUUURUTRTTRRRRRRQPTV[X\m^SUWWXXXSWY[ZWUTTSSQRVVWYieb^hyxibWUSSSSRSVVRTTSRQTTRSTTSSTY[UUQRQTWW\cf_TRRSTRPRSQQSSSSPSRS]ecdlzlkrpme[UV]ZSRT]`WQTT[dcUSUTVV^YVTSSX_\\bbc^SOPWTPSSPTR\jgdeffifrtrppkeikjlnnlmqrrqqurutvstquwwutuuutusonnlmkijijiififgfhfggfgggeeffdceeeca`c^_``\]]_^^]^`^_b_^^^^__`^^^_\]\[\[\Y[\]^_\_^\\]_`OPTVZ[X]bYVSQNPRONOORPONNOOPPQOPNNQOONOOQPNPRTNPQQPQQOOOMPPNPPNPOOOOOMROPPPNMPPNNTVSQQPQRPOPPOOONONPOOQQPQRNLQTUTRSVVTWZchptg`WRTQRTWVXTUQSSSRQTUTZc]RSSRTVVWWYYUSUTUTTUWTUUWTUUUUXXUXXUUVXVSVWUVSTVVWUVVTUUSQSQQROOQQPQRTXV]jXVVYUWYUUXY\YTRRPSVUSTV\hsvg^mocXUSSSSSTWWSTTSRRTTRSSSRRSWUTTRQPRX_heVSRRQPSQRPQQRQPSSSSRSW\dfctaj[ZYYVTT_ZTRU_\TSTSU_eXQRUTUVWSUQRWZZ[b`b]SPRTTRTUQTQ_fbbhohfjqtsqjjfiiijmnloppqrprtusuststuuwvvsurtqmmoljjikjkhghhfiifghfegfecegecdddedc`c^_]__^__]_]^]______^__``^^^_[]^\\[\Z[]]^_]_^\\^^`QPRQRWX__XSNPPOONNPPPQNNNPPQOOOPMNROOOPOPPOPRQOPPPPPPRRQOOOPPOPPQQOOORRRMQRNRPRRSWUQOOPOQRNOPOPPONNPPPSPPQQMORQRRSSUTTUWY_tygYUUPRQRUQRRQRQTTSRUWTZd^TQPSQWYYV[\VTUVVVVVWWX[ZVZVX[VXYXYUVVTUTUUSSVTUWXWXSRQVSQQQNQQOQNPSSUVVUTXYXYYWZZX[WZXQPQQRWSSXdyucZftgZUTSTSTUXXSSTSSSTSRSSRRQRVTSWTQQS\eaSTUSSOPRSOQPQPSSUTSRRSVZ\X^pm}\TTVSRT`\VRT`[RSRRU^bVRQTRRRUWUST\ZZ]abd[QPQTTRTTQSXff]^mvifiqssqgjekghjpokmqoppprsssstrrstuxttssrtnnpmlkihhjkkhhefihgggedfecghedcfdddcbbc`_\^`_]^a^\`_\\^`_`^^^^_`_^`[^`]\[\Z[^]^_]__]]^^_URQQPQRUTQPNOOOPPOMPSOMNPOONRPPPMOSPPQPOOPPPRPPPPPPPRQRQONOPQPQOOPPOORSQOQSOOPQPVVPQNQNNOPNMNPRPNMOQPPROOMPPRPPTSTUUTUUVYb|o^XWYURQRSSSUPRRRRW\]_bd^VRRPPUVYX[^[VYUWXYYWUWWYUUTVYUVR[YWV[TSTUVUTTVUVYYURSSSSRSQQQOPPQOORUVWWXYZZ[[ZYZWUTRRORNQQURVd{~haiyy|~]VUTTTVYYTSTSSTTSRSRRQQRUSSZVQRU^a^RSTRRRRRPURRPQVQRUSSRSZ^\Y[diofYTTVTUW^]STQ_ZVSSRW]ZTQRRRRRQYTUV\\ZZ^Y\YPPRQSRRRPR[fd[]jmgfmqswpkkeihiimmmosoppnsrrrsrqstuuttusqrpommljkihikkjigggihgighfeegfeedebegddddaa`^_`]`_^^]`]^\`^_^^]]]_``_]\^^]][][\`]^_]__]]]]_RSSQOQPPPOOOOOOOONNNQOMPNOMQQPONRSPPQSOOOPQQRQQPPPPQRQRRPNORPPQNNOOPPQSROQSOORPPPSROMRRPOOQNOPQPNONNPOOQPMPPSPQUUTTYUVX]Zdtvg__]WTSQQTTVPRSPRSQVY[b^[YTQQQRSWWY]ZXZXYWZXWUVUSTSRTTTWTUXW[\UVVWVVSSSVWWVTRQRTTTSQRROOPQPQUWVWTVZZ]]XWWRQRQNOPQNQRTT`oukbao}qt°¡|gZUVVTWWUTUTTUTSRSRQQPQTSV]XRSW`]\RRSRRQRRPTQRSUTTRPTRSTW][Z\\ZZXUSUVTUYaXQUR^`TTRSX_YVURRRRRQRUVVY[\YYWXXQOQRSSRRQV_haW[ehdklssrplhghihiklorpoqqqqpqrstrqqtuusuqqoqpnkkijighijjhhhhhhffhhfgeedeedddcfedaa__]^``^__]^__]^`^^^_]`]^``__^__^^\[]Z\]^]_^``^]\\^QTRRNNPQNPNOPRPMONMPUSNNNNRSRPQPQQPNNROOPQPQRTSQPPPTRQRRPNQRPQRNNNNPOQQQNPROPQPPNOPNNQOPPQORSSQPOPNQSQQRQQPQTTQSRQUTVXYehjld[YZWUSSSQRUSQSTQQRQQSUWVSUURPSQQTWXYXYXXXWXWWUUSUUTUVWVVTUUUXVUUTWVVRUVUUTQSURRSTWRPQRRORQSTZ\ZUTUVWZYVRQTSORPPSRSSPW]ef]VV]qzxgf©±£zm[WUTVTRTTUTVX]ZSRQQPQSSY`ZRTY\ZYQRSRQQRRQSQRSUTTRQTSSUVWUXXXYWUUVXWSX]`TTUTZbVUSSXa^[XUQQQSQSVTV[_\[_YXWPPRQQTRRQWej[T\edfloqqpqkgffghhlkqoppoornoppssrtsssutqponpmkkkkhijiijhihhiifhgghihgfeeegddfhcdacaa^^`_^_`^^^^^`_`^]]`\`_^b^a^]]^^[\]]^^_``_``]]Y\^RSMNOPOPNRNLPPOLOOQTTQONNQSSPQSTTQQNOOQLPNQQSTRRPPQTTQRSQNURPRSNNMNPORPQNPQNPPQPOOROMRRQTSPPPQOSQSOTTQQPPQPOQRQRSSZUVVVbfigcYSVSRVUSSUVRSXVSTURQQTPSRNQQPQRRUXXVVXXWXXWTWVVUTUSUVVTVUUSUZWTTUWXSTRSTRTTUVUSSUVSQRQROQQWY]^YTVWWUXUUSPQTUUQQQPPQQY_]VUUYaagc[|¤ka\Z[]diYQU\W]]TQRMQSSV[bd]SU[YXWQQRRQQRRQSQRTUTTRRTSSUUVUWUT[]WVWYXW^_WTTTSXdYRURYb]XYVQRQSSSTTV[_`__YXXSPPRRSTSR^heYU_icglnoponjieefhjmmpqppolnpnopqopssttuuponmlljhjjiilhfifhiiihgfggigfffgeddadehccc`a__^`^_`a`_^]]^_`^]^^_a_`a^a\\[_^]]^]Z]`a`__^^_\[]QOLOOOMOPRONQOONMRPQSQPPOTUROORTOPNORPOOOQOORQOOQPPSVSSSRQQOPSTNNLNPORNPNOPNPPRPOOQNMQQTWQPPPPRRRSNSSUTQPOQOPQRSSVVVUTUY_^bcYTYYVSSSUUSTUXWTUVTTRRQRPPRTQSTQVVVVUWZZXXWUUVVVWVWUTSUTTSTT[[VSUVWVSSTQTWVXXYXYWVRSSPOPRSUVZ\TRTVTSTSTTQV[]UQQPPPQQSVUWWTX^UXYf~sile[YZemo{xSQSYYZZQRQPQQYbfcVRVUWVRUQQRRQQRRRRQRTUTTRSTTSUUVUVTT[]XWXYZ\^YTSTSRYbXSRQW`_VYVVRSTRSVSWZ`aa`[Z[URTRTQTRTZgfWWcjfjoppolkjgfeghfjmqooonmolonoopoprtusqponlmjihijijjjjiihjfheghhgggfhgeeefefehgc`^Z]]a^\_`_^^^]^_^_^]\\]^__``]\]\^__^^[\\^_]]_`_`^[\ONNOPNOQQQOPQONONOONPOPPNQQQOOPPPPRPORQQOOPLNPOOPPQQRRRTRQPPQQQNMQOPOSMPNNOMPOSPOOPNNQQSUQPPPPQQQOPQQUTROQPQQQRQRVX[XUVZZ[_]YVWWRSUWUUTSTZVSTSSRTTRQPPSPTUUVUQWTSVUVTVTTTUUTTVTTTTSTVSRS[fZTZUVSTRSSTUWY[XZXWVQSQRNQRSVX\\RQQTPUUUTWVWUTQRRPQRQPPSTUWXUUTUUXc]XTSRTTQS^ixmVVRTUXUSRSQQWgg\UTTTRRSRTTPQQQQRSSRQSTUTTRTTTSUTUUUTT[]YXYZ[Z\XTSSRQ[aXSQRUa^XYXXUVSQQTTV\bcbc`_a[QRWQQUTSalbT^dkjkjnnnkjheffeghhhmnmplnnommnmooorrurpoolkmihjgijjijikiiifgegfhggghffefhddeegfc^]\^aa[^\^c^_^^]`a^]]]]]\\```]][]]_\`]][^\]^]_`__^^_ONNMONOQOPOOQNONMNPPOROPQQPQPPOPRUTRQQONOONPONONNNPPPONPSQQQOMMOOQOOPNPOMNNMQOTPOOONNQPRTQQQQPPPQOOPQSRRKQQOQQRPRUWYXWX[Z\\\XWVTSVWXXXTURSSSUTSSTSQRRQRPTTTUVSYURTRSXUSSSTUUSSUTUTTUVURRWWQUWUUOTSQSPQUXYWRUWTROQORQRSTX\YRRSSRUX_VWRSNOQSNPTUPPQRTUVWVVTTURVPRSTRTQSRRTinieYPX[UUSPTT[hh[YZURSRRRSRSQPRRQPQSRRSUUUTRUUTSUTUUTTU[]ZZZ[ZYZWTSSRRY]VRQSV`aXXZ[[\XVSVUX]_`c]]`c^TSVVUTQVai]Vadiiijnlnjihgfedegefjmnomlnmlnnknmpqrtrrpnlmkiiihhiijkkjhiijggfgeeheiigdefedffeed`\^\^^\]^a^__]_]`[`]][]\[]`__^Z]]\]]^^\_^\]]]^^]^^\\ONMOONQQOPPNOONNNOQSTTQPTSPQSROTXTSRONOPOPRSOONPNONOQNQQPPPOOMNPPPPPNORPNMMOKPRNPONNOQPQRQQRQPPPROOPQRQRMRRPQPPPRVXYWXYYYZ\\YXVTTZXXZYTVTSQSUSQQSSRQQRRPPRQSVW[WSTTVXWSSSSVRSSUUTTTTTSSTVTTQWRRSVQRRQRUYXUVUTSQOPQQRTTWV\XQQTTRX[\UVTRPRQQQRTRRQRRPPSUVUUWVVSQQQRR[ZXWPWV_ik\R]bVTVTW]ipoc_ZTQUVSRRRVQRSSQQQQQSSTTTUUSSSTUTUUTTU[][[[[YWXVTTSSSWZTRQTU^`ZZ\^`a]YSSSVZihd[Z^`_TTVUUSSYfeYYaaejkjmjllhhggddchhhklllnmnljmmkmnporrrpnklmkhifeiihkklijiiifigfffeegeecdecdeefdb_\[Z\^[_\a`^]^\^\\_]]]^[\_a_^]\[]\[]_[\]_\\_^^]]^\Y]POLONOQQPPPRPPONNQSQQSSQRXOQPTQRRRNNMMPPOOQQMNPLONOPPQQNPPNNRPNPPOPPORSQOMNNMOROPLNNPPSQQRRSRPPPRONPQQRROSSQQQPQSUVWVWYXYY[\ZXXWVZXWUVRWSSSTTSRSVSTRQTPPPOQQRTUWYWUX[XVTTTTSQQRRQPTTTUUY\WTVVTTUURRQQSUXYTTURSQPOQQQTWVUZTTOTSRTUUVZZVPSRRQSUQSRQRSSQUUTUSRTQQQQRQbpifTVSV[`]\`h_cb]``_k^]YUSVTSPVUQSSQQTSQPRUTSSTSTTTSVRRSRSV[^]]\YWVVUTTTUTVWSQRTU\`]]_``a^YTTUWZgag\][[]UVUXTST\fbWZaahkilmklkighicdfeegikkjkkkkkkliloorrprrjpjlihjgfhhhjjkkkjhgghfdiegchbfcgcgeebfeba^]Z\]Z]_a__^`]]\^^\^]_]]^`^_\\\\]\]^[_^^\^^Y]\^\Z\]RPMPOOONQOPQRNOOOPROOQRPPOMOORPQOMOONNOLMOQOLLMPONOPPMPNOOPQOOPNPNPPOUUQONOOLPPOONKQRQSOSSQNQOPQSPNPQRSRQTTRRQQSUTUUVWYXYXZZYYZYZZWVTVUTRSSTSTTTUQUSRRQPQPPPPSUWXYWZ_VUUVUTRRQRTRQVUTVVZa\WXWUUUTSQQSSWZYUSTVTQQQRRRUUTTUVROTRSUUYW_k]RSQQPPNQQRPQUPPQSQPQSRPQRRRScz}jXTPTSXZljjbhjb[VXxq^ccYVTTROSRTUSQRRTPRUURSRSVSTTUURUSQSVZ[[__ZVUTUTUVWUTTQQRTU[`__ab`a_ZUUWYYeaf]][Z[ZSVWTQVddYV]ceiijklkkmhfggbcdddhjijjiikkjklkmlmpqoplmkijhhkfehhgijkljjjhgeggfeffiddfdffcfdfdbb`^_[[Y[_`^^^_^a^]_[^^^_\____^]\\][\^]\]]\\V]]^]ZXZ_SPNOQORMQNPQPNONPRQORRNNPQOONPONPNMOONOONOQNNNMNONOOOPONPOPQQPNQPPOONPQQPOOMNPPPOOORRQQQNQOPOPOPSROPOQUSSVVSRQQTWSTTVWYXYXYXXZ`d[[YXXUQQQRRSSRRVWRUSTQRNPONPRUUVVWZ[XWXTUSUQRRUWTTVTWUUUXXYVTSSUUV\XUVYXYZYZ]YVTRRRSSRPTVRPQRSSRY^XW_WSURPRQRPRQOPSTSSSRPRRRQRQSSV`fh]RQSTSR[jjnpnbVURQZa\W^f\SSRQPQRSSRRQQRTQSRORUUVSSUVWTSSUTVX^V]a_YZXXZYZYVSQPQRTUY`bbccaa`ZVVY\Ycae_^\Z[ZUXWSP]fYUUaggikjjkkiiggfecdccbgfjijfmiijikmlnpoonmlkkiiiikdhighgigkhiihhffhgedfhbdedgfefefcca]^_]ZY]__`_^^^`_\_]]]_^^_^]^\][\\Y\^]\]][[Y]^]\ZY\^RONRROOOPNMPONPPSTRSRPNNNPSQPOOOPNRMNNSQOPSOONPMQQOPOONLNPPNLNNNOOPPPNOPPPONMOQPNMNRTPRQOPQQNQNQRROOQSUSTVWSPQRVYSSTVWYXYWWXZ[gp]\[YXTQQQRRRSVVVWTVVRTPPPPQQSSUTUSYZVSTUSRTRSUQUUSTWVSTUTTUURURQRV[WUVTSSSVWXZVXRTSTVXXXWSQRSSSRTXXUXWUQSQRNORNTPQSTSQRSSQQQQPPQRVYWTTSRTSPT\`Xep]URRPQQRPQRWTRSQQRQQQSRRRRRPUSQSTSWUUUUYZZ\\YV\^_UV_^`aa^^YZVVRPQRSUUX`eeddaaa[WX\\Xaad`^]Z[[XZWTS_dWTW^fihjjhjkhgggefdbbedeehghhhjfihklkklmmnlkjihiijhihfihfihhhgfggheefgfedfgdefffedd`da`\]_[Y]__^^_^___^]^^\_^]`_^_`\\[[Y]][Z\^\ZZ^_\]]\]]RQMSRRRQPPQPPS\QTPQOQOPOOMNQSRPPQPPQOQQROMSOMPPOQPNOPQOMOPOMNNPOPOPQLLMOOPNOQSQOMMOTTQQMOQNPMQPPUSRQVVSPTWTQORSVWURQVXZYYWXYZ\m|_^ZVXTRQRRRRSTUVVSUWVTRPRPQRVUVSRPXYRRTUSQRSUUQSTUWTWRTTRTVSRRQSQXc^TSRRUXSRRTSSSVTU^c^d[USSTTWWVVTSUTRQSRRMOROPOPSVQRRPQSSRQNQRPORRRRSTSPPUX`_chUSPOUPRRRRPSRRRPPPPSSPRRQSRTURTTTTWXZWTX[dc`\WY]^XV\WX[VXVVVUXXQSSTVTU]degebab\X[_YX_ac`_^[[\Z[XUVacVTZadgfhhhjjjifccddaacddgfgfehfjgiillklmmmlggggiihihgfehgfifgfdffdegfgfdddeedeeefca_caa_]^[Y[]]a__^^__^`a_]]__`_a^]]\[[Y]]\\Z]\ZZ\^]\]\Z[SOPRPUSURTVRRWWNNSUTSROSRNNRSQPRSRRRPPPOOOQNONQNQONPQSQMOPONNMONPPNPNMNNNOMORRQPMOPOPPOOPPNMNRQPSNWTVVRTQSQPQUTXZWUUWWX[\XX[Z^ta\WVXSSQRRRSTSUVUSUWWUSQRQQRUXTSPPVVSRVSRQSTTTRRSSTSVRRRSTTRPRPRQZd\RSSUVVSPRRSSSTTT_c`dXSRRRRSURUTRSTUQQTQMPPRRNSRSPRPSPRPPPQNOQPQSSSUSQQRTVamg\VSPRPPPRSRQTSSQROPQPSRRRRSTTUUVTUS]Y_WW\^nlfe][ZXVTVVWUVTTTUWTWUUUUUXXXW\`_^`_b`cbWX]bca`_[[]]\YVZcaUU\_cfeffijjiifdccbbabbcdegfgfffihjjklklliihhhghghihfgggedhgddfffcheigfhgfefedfgfcb_cba]^_Z[Y\]`]^^\_`^^_`_^^]^``__^[[\[[\]\^\\ZY\]]\[]\ZTOQPQTOMSSTRSTRPQSSUSNOTUONQROOOQPPPPQPPPOPOOONQPPQQPQPNMNOONNPPNNMNOPNMOMOOQNOONQRQOOORTPNQRRRRQQPUUWTSURRQSUVYY[YYZZY[[WYZ[[gviXTWXSTRRRRSTRUUTSUXXVTSRRQRTUSRRRPVSSTSRPQQQTRQSSRQQOSRSRPRQPNRRRSSQSSSTQROQRRQSTSTVX`dXUQSRRUURSUSTRSTRRRQPQQOPSPPQQSTMQOOPOPPRQRTTPNPQRQXW_kb[XRRRQQRRSSRVRTRRQPRQQQSRSSSVUTVWXZY\[X]abjekg`^ZTSRTUUXXUVWZXVTWVVVTWVRRUVX[Z\[Zae[XY^feb`\\^`]ZX]e`TWZ]bedeejkjiigeccbaaabcdeggggegihifikkljjighfgggihghgggfgeheeeedeehieghfgffgffggebadb__``_^\\_]^^^\^a^]^^^]]_^]_^_\[]^\\^`[\][YX]^[][\][URUPSRTV[VORSQROSRQTUPPSTQMNROOPPOOQQSRQPONOOOPMOOPPPPRNKNNQPOOPRPONNMNOONQOOMMOQTSSOPOSROPQTTTSPRRTUTSVTUUSTTWYW\XYZYZ[[Z[YYZ[^]WUWWTQUTRSTUQUTSSVXYWVUSRQRSRRQQQPUSSSQPQQQUURQRRSRPPRQQSRSNRPSTQPTPPRTSQPPRQRQPRRRPS[_SPUURSUURRURSSURSSSPQQPRQRQPRPQSNQNQQSORPRSURPNOPRSTU^mbYTRRQQOPRRRSSPVPPTQRSVTVSVVVXXXZ[ZYZ\\[_dam^heg_WVUTURSRY]Y^`ZVUVVWUSTSTRVTUZZZWU[cd]W\fecc\`_]^[Zah_SUX[adccfjkjijhfdcbaaabceffggfefghfgihikhkhghhiiifggfgfggfgfdeeeddcfhffdedffeecghecbca`_`b`__[``_^]^]_a^^]^]^^^^__][[_\]]``^`]\ZZ[]]\^\]]VVURSTXXa_RSSQUPSVQQUUPSXRNQQRPPRPOSPRQOPONNQOPRMOQOONONMOOQNQPQTQNNOOQPNPQNMMNNQRRPSPPQQPQQTSRQRQSTTSSUTSUVVUTWUVUWXZYY[[ZZZYYVUVUVRSRSTRTSRRSSSSWYZYXWSRQRRQQQQQQUTTRQPPQRTTRQPRRRORQPRTSSQRPTVRSSSRSTSPQSQPPRQQSSQRY[SRSTRRQSQPTQRSTQSUSRRTORQPRRQPOSQOQNRPORPTRSPPQQQQRTS_g^UQRPQQPPQQQRSSTPPTQVUTWYWZZ[[[[]^\YZ^\Y^gZa\acg]XZTTTRUVT[]`a\XTSVWUSSSRQURQSUXUUV\aeebfgedaa```]]\idUQWZ`cbbfkkjijigdcbabacdeefggeefghfghghjjkhgjfkjgfgjddfggfeddefedehhedegefdddecffgcbdb_`a__`_]]`^\\]`]^]]_^]`\Z]^]\\^`^\___^][Z]ZX][[[]\\VSSSVUQU`aUPRRRMRVQQQRRSVQPRSTQRSOQQPOPOSMPONPQOMPPPNONOOQSQNPPRRQOMMNOPOTTOOPNOTPNOQQQQLSRSSQTSRTSRSRQTSUVVUWWVUTUUUX[Z[YZ[b]VTTTSSRSSUSTUURTQTTVXXXYYYTSRRQPPPPPRUTTRPPPQSSTRQQQQQOQPPSQQQQQQRSRRUSROROQQPRQPPRTTRSUXWQQQQQQRRSRTPRSRUSVURRPSPQRSQOPRSQPRPRRPQSPRPRRPRQORQS_^^YRQSTQQPQPTQRSSORQRTUTUZX[\Z[]Z]]\[]_]Zah_ab_`cXUYUUURTTUXW]`_YSSSUTQRUQURSTRSUUTSTUW`fdcba]accdc`\idSRWYcfbbhlljikjgdcaabacdddfggeefghfggghjjjgghfjhgdeciidgefeeddfeefffeehffecfcecfefcbcb__ab````]Z\^]^^_^a]^^]^]\]^[\]_^]___^]]]\\ZY[[\\[]\VSQRUVUW^[URPONQPSRTSRSRVRPSSRRSSPRVQOPRQNPPSNSOONOQNPQPOPRORQQQQNMMPNPPPRQPOOOQSONPSURNONPSUTUOOPRPSQPRTTUVWWTUVWVXY]\ZYXWX[[XTUUUTTTSUTSTRUTQST]TVZXWZUSPQPQPPOPSUUUQPPPQRRTSRRQQQPQPPRQQQQRSRRSSTSQOPRQPRSQOSRSTPUXYTQOPPOQSQORSQSQQTTTUTTSQRSTSQQQRRRQOQSRRQTRQPUSQSSORRS`Z\ZSUUSSQOPOQRQRQQRQUTTWUYWZZZXXY^[a]aa`[_ih_Z[ac\URUSTQTXSTTW[\YTVVVSSVVTSSQRRRUSTSTUVV_d`\^_`behgd`dhTUV\gec`gkjjjihgecaacadccdfggdefhhfggghiiigggfigfdddggfedee`cdddgffhedffgfdddeddcecca`^aba____^\\^^^^^\`^_^]^[_]]\[\]^]____^_]\\ZY[Z\]\\[OQRSUW[ZWUQPNPQPOOOSSQTQTRPQQPPUTTUVQPSRQPTSROQNRPNOOOPRQPNSUTRSPKMOONOPPOONMNPRTRQSSTQNNPOTUSSRRRRQSQRPSTTVWVSSSUX\^`VWUVRRSWWXWVTVXVVUUUTSUSSSVWXW]YWZVSQSPQQQPRSRUVQPQPQQQTSSSQQQPQPQRQRRQRRQQRSSRRQPOOQSRRQSUVURTX\VSRRPPRPNOQQQRSRQSSRV[U\Y\XSRSSQSWTQVXUSQRRRRRQRSSRTRZ_ZWQQSRQTQPPOQQQQPPQQQRUVUY[YYWYX\__^^^bb[^cfbZ\cf`XTRSUSTTTPRSVZXW[XTQTSTVTSQQSQPTTSUUUXXada__^^cdc`aieUVX^gbc`fgjklfhfdc`bdddccdfggdeghhfgfggihhgggfhffddeffedcdc`ccbagfeefeefhfeacfdfefcdcd`a`__`_a`][]^^__^_^^]^\[]]]\\[`]^_^^`^^[[[YY[\]\]]\OORTVZXZUPOPPPROPOPPSQPPSROOPPNVTTRRRRTTUVRRROQPPLPNNOPSSTPTTUUTPMNOPOPPPQPOLOPQTWVRTTOMOOQQQQPPTORQQPRSNQRTTTRSTTX[\YSTTTPPQTVXVTTUVYWVZa[WUSTTST]]XWYUWUVUQRSVRRRQSTQPRQQPPTTTUQQQQQPQRRSRQRRQQRSSRRQQPPRSQPRSTTXUVUYRSSPPQPSRPRQRRRSTUQQUWWegffVXWXVUYXU_^URQRUTSRORQQSRUYaXWSRRQORRQPQRQQPPRQSQRRWT[][ZYZ\\cda`a]]ZYYZ]\\cclhYVUTTTTRPQTSW_ZVWSPQRVUURQQQTTUTSURXUXZaib]Y[_`_`dibWWY\`abcffimjhgdcbceceeccdeeefghihggffghgggggfgfeddeeedcbca`ccbafeddeefeghfdefeffdcddbb```__a``]^___^]^`^\]]]]]\][]]]__^^]^_^\_\X[][[\[\]POPPTRTORPPRTSOPQPPPPQPNTQPNOQLUTTORTUUVUVVTROPPOQSPOOPRVSQRSRRQOPRPOPPNNNMPOORQTQSTTSNOPPQQQQQPROPQQNSRNPQSRSSTSSX\]`YSWURPQQWXUTUW\[^aafe]XTTSRVZWSUVRQTRXSUTVTTURSQRSSQPQQSTUUSQQRQQRRSTSQSQQQRSRRSQRQQTSQPRSSSVVWYZVTURRQQRSPRQRRTRRURSVVWdmmpWRQQQRSZVVXUVWVY[XTPQRQQSSZ]T^^URSQRRQPPQRPPQPQSSRQUX\[]YZ[^\gcfb``]`]Z[]\ZbfoeWTRSTSTSRQTSW]eUWTRSVZUURRRRTXXTSTVUWWSV`kjb^^a_ejdZYZWWZ_bcfflkhiedceafdfhedeffgggghgfhfeghfgghgfffedddddbbbca`ccaafeddeeeeggecdffdddccbbbaa\a`a`^]_`b``]^^]]]\\[\_^\^\]]a]^^`]^\^]X\\\][Z\\POQOQOMOOOQVQQRPRPPOPQNOROQMMNNRTTRRURTTRTVUSSPNRTTPNPNPQSOMPNPMPPQQPQPOONMPPOPPPOSURQOQPNRRRSSSROPROOSTSRRSRSUSSP[YX]ZUYYTQPUY[\]W\][hibcjpoaXTUVSSTTTSPQSRQTSUV[`XVQRTWXVSRQTUTTSRSSTRRPUTRTQQQRSRQTQSRSUSRPRSRSUUVYXUSTSSVSRQPTRSRQRSURRVaopkeeURORPRQWTXTQSXY][YVQQQQQPS[YT_cWRQRQQPRSQSRQQPPQSSST[]ZYWZ\\\ede`gkgbhgfdaXakgZPSRSSSRRTTUSSYeZYTURVSTTSTTTVXWTSTTVWTQSTaklhffgif]VZ_[ZZ[`dgihigeebbabbaehjfeegigggedffeeghgegfhgfgeedcccaaaba`cbabfeddeeeeggecdeedcdcccb__^``a_aa_Z\dab]_]]^]Z\__^^^^][[^]^_]_]a\]X\]]^\Z[\RQRSTMQOPOQTOPPPOPPRRPNNOPPPROMPRSQWPPRQPRQPSRQNRQRSONNPSQNQNOPROQORQQPPNPPNQPOOOPSSRPORQRQORQSRPQRSQPRQRPQSRQUQRQVVVVUX]ZSTWU[ajpdca[dc`g~}p`YTRUWUTTRRRRQRSQSUV[VTTSRTVVSVUUTTUVTV\UOQPVSQRRROSSRPURTTTWSRPRRRSTTVYWUSTSSURRQPQRQTPSSVRRRRSVWVUPRQQPPQTUSPSPPTUOV[SQQSSRZ\VTXXUPRQQQQQRPPRPPRQQQRTTX\YUVZ]^\accbhhiafljkfW[gfe[SSRRURSRTUQPUXYYTSSUSRTQTSSTVUTUUUXVSSSUTYcgjgg^[VVW`[Z_`dffikifedaab`a`bdfhigiggfdcedeeeffheeghgffedddbb`aaba`cbabfecdddeeffecdeedcdccba__^`__`_c_Y\a`a_``][\Z]___^\]\[\^^^^^_][]]X\b[^YZY]SRSUSSONPPQROOQOOQPPOONOPQQQRPOPORRQQSRRQQOQMOPOOOORPPTSQPNOQQQPRNMOQQNNNOONQPPPPOQRRTQPSRPOPPPPPRTSOQSQOQPRPRRTSTTRTV[cbZURSYj{~|zjd^gmf_XSRVVUSUSRRRRRSTSUTTRPLOQTUUSSTVUTZYWVYWOORRRSRSQPSQPQQQPSVYTRPRQQSSRVYWTSSSSTRRQPQQQRQSRUSRORSSRPPRRRQOQRTQPRUQNQPMY^XXYWXVc_TRTVRQRPRRPPRQPSQRQQRPRTVX[[\\[\[]jmedfecaehijhX]jkbZSRSRQSUXUSTRRTWWVVVZba^ZXUSUSTRTTYUTUTTVUUY]\\YTVQUU]XZadfhhijhfeb`bb`^`ccdffgihiheeecdefffedehghedceacbd_bbbaacbacfdcdddeeffdcdedccddcba__^`__``b^Y[]``\``\\]^__^]^]]][\]]_`_]]\]ZXZ`]_XYZ]XZZ[YTQNSSRRQRPOMQOPNOOQOOOQQOPOOQPSPQSQQQRQNONNPMOPQRWROMOPQRTQKPOOQRNOOSQUQORSSPRVVTRQQPPQQPNRPRRPOPSOQSRPPQRTVYYQUXY_g\TRQWl}||qlk~¬vc]XXSSTUSWRRRRRQQQRSQQRSNPRRUXUTSUXW[YTUWSPQRRRQRPPPRPRROQPRUZTTRPUQSRQVYVTSSSSSRRRQRQQQRSRUSQPRSRRQQRQPRSTRPTVUSSRQQOPUW[^]YTbYTURRRSSQQQQRPPRVRSRSSSTSUWX[^]^`^^hpicfkhdbbedgWacb]VTSSSSY\\[WURRTVXWZY]ehghg`UTSQRRVRWUUTSTUUUXVUUTUSSRXVZ`defjheifecba__abcdddefihjhgfcddddddbfhgggfcdcacbcabcababccceccdddefeedccedccddca`___`__`aa^Y[]_^\`_\]_\^_]\]^\^\]`_____[[[[YZa^^X[^\]bbfcWTPSSSRUUSRPPOPOQQQNNLMRQQPPQQQOORQRRQNNPNNNNORSRSQONOPPRTRPQNPQPMOSQVUPQTVRPQVZYTSRPOSWVTQPRPPPQPSSSSQTTPU\^YVWWY\f\USVR\ebgnrlglt ¯¦ga_YSTXSTURSRRRSRPPQQRRQPTRQQXVTSXZXZXSSSVRRSRQQPOPPRORPPPQQPRSTQPUPSRQVYUTSSTSSRRRQQPQRSSRUSQQRSRRRQQQPQRRSRRTTRRRRSOQRUZ^[WVaWUXTQRSQQQQPPRORVQQPQQTTQSUYY_\^aa_dghcejiebbac_W___[YYWUYX[[YZYWTSTVXZ_]`dhjjje\[WVUSSUVVUTSSUXXWVTUVTTSSVWZ`afgjgigadba```ab`bdehfihkjjideddbceegheedecccbcbacccaccadcbddceeddefedccedccddba`___`__`aa^Y[]^\\`^\^^\]^\[[\]\\Z]_^^^_^]\]ZY\_\]]^^bjnqi[WRTSRRTTRRPORTQSUTOPJOPORNOPQPOPQSRQQOOOONNMPNVTPPNLRNQPPOQONQPNPQTRUTPOTTQPPQVWSTRNPVWSRRRQPQPRORQQRPRSRX[ZVYVXWYZXTSQRUVXakngafo°°nhf][ZVSTWSSSRSTTPNPQTQPRTSRRTUVTVZYZUORPVSQSTPRQOQRPOQNORROMRRRRQQPRSRUVUSTTVUTSRSRPPRSTSRUSQQRSRSRQQQPQRRRRRSTRRRSTUTTV\^^XU^VUVSUPSSSRPPRQRRSRQNRSSTSRSTY]Z_`_\^ab^_dffedab_Y^__]]Y\`]YZZYYZZUUUVW[adfcagkfggkhaZXY[XTUTSTTXXYUTWWUUTTVW^bbhghghideac`_a`abbbfiiijlljlhgedcaebffdddcccbbbbdcccdddbbabbebcfcddegccdeedceeaa`___`_``a`^Y[]]\]`]]^]\]][ZZ\\\[Z\^^^`_^_]\ZWZ]\Z\^_hs~|m_ZTTSQRSSRRPPSSPRTSRQMMQOPNNOQQOQRSRPPPNPNNOPPQSSNMNNOOQNOPOQOPMOTVRQUSNQYWQOPRSPPUPPRUTSPPSSQOQOOQOPQRRRVWVWX[TXWVSRUTRRUVUY^[_[aj}­wmmdWYYRSZSSTWPSTNOOQRSTRUUQSRSUUW[[XQTOTWTRQTQPOQQQRQOQRQPNQPQQRSQPQSRXUTSRSUTUUSRPPRSUUSRUTQQRSRSRQQQPQQRRRRSTSRRRSUTSUVWYYY^QUTTURQSTQSQQQQRQRTSSSRTUTSS^aa___\VYZYW[`accac_Zab_]]accefgda]a`_XZXZ^_^_^[bklpjkcbdcadb^XPRVWV]WUU[\ZVRTX]`bfhihgjddebeabb`acbacfgiiihkjfgddcabbceefdbaccbaecbcddbdbbcbbfcdcedecdbeeeeeedca`b`_`a_aa`_^Y[^\\]`\]^\\\\[YY\\\[Z\]]^_^]^\[ZVX]\Z[__itc^WURQQRRRRQQSRPRTSRPMMPOONMPLMOPQRPONPONMNQORONPNNONPRPQONQOONMRVTPOQPNQTSROQSTV[UPPSSRRQQVUQRRRPPQRQQRVVVVUZYVWVURSWTQQTRTXYWWXZar}xsl`XWWTTVTTUUQTQPPOPOTXUVTQQPQSTYXVTSRQPRSSRTRTRQQRQOOSPPQQQSSQQRQRQQR[ZTQPPQRSRSSQPSTRQRSTRRRSSRTRRQQPQQQRRRSTSRSRSUTSTUXY[Y\QRTTSPTQQPSQRPRRQTSSTUVVWWUVZaa]_\]Y[]\WWacafde]Y^aca^hqppkhkkfd`d][XXVXUV]\\gqiahdaefjkf]VRRTUVVVUY]^][VVZ_`bgjjgeffddbcaa`_baaedfgghhjlkgfeec^`b`dddc`dcdbccdbacb``bbbbcdbbceeebecbefffdccaadb`aa``aa_^Z[_\\]`[]][[\[ZXY\\\[Z\]\^_^]]\[YWX\[Z\__i{f[YTUPQQQRSRSRQORSSRPNMPOOMNOLMOPQSPRONPNONOQNNPONMQQMRPPNNLPNOQSRSSPPPRVVUSRRRUUXQOPPRRSQPWURTTRRQRTSQRSVZZVYVY\YSSUUTRRQQUXVSUXX]amxwwveXTTTTSQRRSSSPSNNOOPWTUUOOPPRTSSRSTQPQRQRTSTQPTQSOPQRRRQPQRQPPRQPRQT\YSRSRSPOQRQRRQQQOQTSRQSRTSSRRRQPQQPRRRSTTRRRSUTSTUYY]YZQRSSRPTQPPRQRSRRQSQUUW\]ZYWXXZ^]][ZXY]^Z[[bdegdZX__ab^fplifgjnmkdb_WVVWTVUX^]gl`ajmlolgiaYSSQRUTWXX\\\_a]\`a]`djjigdedbbaaba`_bbdefihfhklkhffdb`__`dec`caecbceaeabaa``ccbbaabcbcecdbbgcgegcd`deb``ab`_`a^[Z_]_^a[^][[[ZYWX\\\[Z\\\^_^]]\[XXY[[Z\^^^p}zl^VWRQWUPQORSQQORSSTQOMOONNOOMMOPQQPQNMPOOQSQOOQONQPQPOMMONQPOTQRRSRPNRQTSOSVVRQSTPPQQSTRPPRTSTUUTQPQQQQSWYYZ[[\ZXSSTVTTSSSVVTVVVVXXfkSXQTPTSRSRRTRQNONOORRTRPPPPPQQRRRRQQQRRRSQRTSUSROPMRPTOPRSPPQRRQRQSYUSRQSURPSPQPVPPNRQQSSRRQSSURQOPOPPPQRRSTUSQRSUTSSWYY`YXQSRSRQTRQRSQRSSSSTPUUY^b]YXWVVZ\[Z[VVY]\X[bcdddU__``^_bhhfggikmmied_Y[X\\ZX^Z]cb]hjiigda[URTWYWTZ]\Z^]][]_aa_agigfgfddba__aa__cacgghgegjkjggeedbb``acecadabdcfcbbbbcaa_bcbbccb`bcbbcdbdfegdaabbcbaa^_`ab`\[^_````_^\Z[YYWX\\\[Z\[]^^^\\\ZXYY[[Z\]^Xiy|{vf[QSSXUPOQOROQUTQSTRPNOONOOOMMOPRQPQNMPOOPQPPOPOOONNONLMOQSQNURSTSQONRRSQQUUUQPTSOQSTTURNNQRPQNSSQORQPTTTTRV[]]ZUTSTURWVWTVXTTWTWWXiqaTSSQRQTUTSRSRRPPOPOQQUQOQPQPOTVUQRQQQQPPPPRSRSSRPQPQPRNRSQRVSRQPPPSWSSUXTQSPRPSUQPRORPORRRRRUTRQRPOPQQPQQTNQTSRRSVUSSYYYbYVQRRRRQTSRTTRRSTTUUQUUY]\[]XWUY[\\\]]XY\XWW^cceeW[bc[^dfgigihhgggehliab`^]]\^^]X_chigffc_ZSSY\YVWX][]\XXX^_ba_ehhfffdbdc__^^```aadeefhggilhhheedc`ab`bdcbdabdbf^d`abcb``dcacbbccbbbcccccfegecbbada_a`^aaa][ZZ__^a`a]]]]WYXY]]][[\[^^^^\[\ZYZZZ[Z\\]gzhRSRTVTUTRPQRRRTSPSPNNOPQPOONNPQRQPPNMPOOPPPQPPOQPNNONMMNOQSRSSSRPPOORTQSTVTRRRQSORTTUSQNNQQQQNROOQSSRSTRQPQQSVWZ[WXXWUUXWTWUUURXX[]pwl\WXTTSRRUSURUXVURPQNPOROSQRQOPQSVUQRQQRRSRPNSSQSRQOPQPPSPUTUTVURSQPPVTSUUXWRROSQSRQRQQQOSQQRTWVTRRSQOPQQSQQSPPWTTQSTUUTXXZeZTRQQRRRTTTUUSSTUVVVSVVY\[Z\XWUXZ\[\`]YYXTTTV^hgeYY_b[^fjgfgacfhfcffedcbabbcbbc_^djllaa]a_^ZX[[Y[ZVXZ]`]`\a`a^dgggdeecdfd`a````cbaaa`eddedjfhhffceb_bacedbbbbbacaa`b^babaeaac`abcccccdddeffecaddbeae`a_b`_]ZZ[``_`a``^^][[X[\\Z][X[^]^^\[\ZZ[ZY[Z[\]v~_SUSVWWRRPPQRQSQQQPONPOOPOONMOQRRQPPNMPOOOOORPPPTROOPNMMNOPRQQQQPNPROQRTWYWTSRQMQSTTSRPNNOPPOPROOOPTURTRRQOOQPPY`[YXXZ[[ZYXUTWTTY[cd`afb[ZXXXWVTRSRRTX[UQQTQOPRQRPQNPQPQPPQRQPPRYVSQQPRSRPPPPQOPRRXSTTVVTUQRT[USTVWSQQPRQTRSRPOMROQQRTWUSTSRPRQPPQSSTPRUYRPSUTVWY[ZbXRTSQRRSTUVVVTSTVWWWUVWY[ZY[XXVXZ[ZZ^\YWVUTSSZbcbYUW[Y^eibdebcegefcbcacdcdececab`gpie_`^``a^\ZY]]\ZX[][]``bbbaghgddddbcgeca`_bbacb```caedfeghffhcbd_acceeccaabb`^`_a_abb`d`ccabbecbbcbcdddedfdddcbcb_d``_a]][\^]^`a__`_]\]YZZY]]\WZ]\^]^[Z[[\[Y[Z[[\o{viXYXVWWTRRPPRQPQRTNRPOQNMNMOONOOPRPOOOMOOOONOSQPSVTOPPNMNOOPQQQQRPPQRQPQVTRSRRQSQVSQQPOOOORTRPQQOPQPTRSTSQPPQQOSVZTSUWYYYWY[\ZWVWX[[ZZZYYXZWYWWWVSSSRTWXSPNPOPOQSRPOMRSPOORRQRSRSWRRRSRPRQQSQPQQPRSUVPSSVURTSW\URSRQRRQQQSTUSRRPPRSPQSTSRRSVQQQQRPPRRQOOSSSSRSQV\[^]^RRTUSSTUQRUWWUTUXYXXWWXYZYXZYXWXZZYY\\ZXWVUUV[a^\VSSUWZacbcc_ceedddddaccaccbcb`aaaec^^]`b`_^XX]^_^aab``baccbachihcebfededdbacacaccdecbaceefffcffda`c]cadecb`aa`^^_aa__cabcbcbbdbaccbbd`cedddddcdddcdab_`^`Z[_[][]\]__^_^\]ZXZY\\]YX[\]^`]\\[XZZ[[Z[\nqzi]YUWYUTSRQPOPQQOPQRNQPPQQQOPONNNQTTPOPNMNOOOPRQQQUYVPQQNNNOOPPQQRTQRSSRQQTSQRQRTTRRMONPQPRRSTVUVUUVTSRQRXROPQQPORUVSRUVWWWSV[_baZVWVUZ\[YXYZVUYVYVSTRSTUSQPQQPPOQQQPOOTTRQRPTTTRUTUSRRTSPSOSQQRQOQRRSSRTSUTSRRTXSTPOPSPQSRRVUUSQRPPQPTSRVQSRTQSQRRPQPQPPRRQSSQTT]cbwo^UTQTSRQQQSTUVUTVXZZYYXYYYXWYYYXXYYXW[[ZYXWWWY\`]\XUVWYZ\[X[UXY\[^c]_`b`dbaa`_`___```a^`_\^_`Y[^`_bedehecddb_acfkgedcgfbcdcbbbbaacbbcdcbeeeegfddbbbcb_ccebbc`c^b__]_a__ca^ac`^bcaecacbdcdedccdedcbbedaa`b^^W[]]\]^\^^_]__^]]ZYZY[ZYXZ]]]_[]\ZYZY[\[ZZce`YQQSSTURPOQQQQPPOOPPNNPLMPOPPNNOOOSURRONNMNOOPQRQPSYZPSRRPOPPPOQQRVQTUTSRQSSPQQRSSRQMOOPRRSVSVXWVUTQSVTRSTROPQQQO\WVUTUTSVVSW]dda_YVUVXWYWWYUSWWWXXRRQQSSQQPPQPNPRRRSROTSOPQTSVURPSTQQSRPORSRQQRROTPQSSSSRSSSSRTWRTQQPRPVTRSPQRPOQQOPSTRRSTRPSRSQTQPQOPOOQPQQRTVX[gnzWVTURSUQTTUSRTTTWXYYYZXYZXWWXZZYXXXWVY[[ZYYYZ\]_]]ZXYZ\]\[Y[VXUSRTV\_^`^baa``[[]_a``dffedaafddfdbc`baedee`a`_agghhdfhgcdedbabd_cdcccbabbdddddedcabccdadbcbaaca^^^^^__`_b^_bcb``adcbbbceececebb``baabbcdba`]Z\b_[\_]^^`^]^^\[\[YY\\VWZ\\b[_^\\\\[W[[XWWYZZWRSSTSPRRRRRQOPQOOOPPPOLNOQOONNQQRTQRONMMNOPNRVROPUWRQPROOPQTVUVSXRWWUTSQRROPQSSSRPNOOQRRSVSSTTSQSQPUXVZXQQQQRQRWTTQUSTTVTSU]t|tm_VUUUUXYVUTUSVSTTUQSSOQPOQNNONQQQQPPPQROQQPQRRPSRTRQRQSQQRRQQPRUTQQRRRQQQQQRUXWQQQQRQSVURSTQRPPOPQRTTSRRORSPQRSRTUQQPOQQPPRSSRU]dhjf\SWSSSVUTUVSSTWTUXXXYZYWXXWZZYZZ[ZXWUX[\[ZZ[\_^^^]\Z]]^^]\Z[WXUUTUW]___a^ca`ZZ]`a__aehhhfeghhheeb^a_`bae_^^afgfhgffghdbcfc`aab_ccbca_bbaccaaacfdbabd``cbdbba`a^a^a]______`aab_^_aa`bcbdeefafbbcbbbadcca`a`\[Z^_[Y_]_`^__]]^[[\YXXZZYZ[\`_]_]\^Z^XZ\WX[fppdUSTRRQTUUPRPPQQOSRQPMNNMPQSQPONRPQOPRNNNOMMOSSQOOQSQPPONNOVYRSSRXUWSVXURQROPQSSSRONORSSRSVTTRRRQRQQRVUTVURQQQPRUSRQUPSSURRT[htuwg[WVSUWYUSSTTSRQTTQQPQORSROQMOQOQPQOOPRSPPPQQQRQQRSQRSRQRPQQPRSTTQQRQQOPSQSOVZWTSRRQRRSSWXSSRQQRPSRQTTQQSQRQQPPSSSRRPTPQQPRRSQSWZ_gbWUTTSUTSTUTSTTUTVVXXYWWVXXY[ZVWYXXT[X]\Z[[\]_b`_^^^]```^^\[[XXVWVWY^`__a^cb`]^_`]_cfefeeeehhgfda`_^`__`_aaabeghggegggca`cdaabb]dbbc`bcccdcebdfeccdcba`cccacab^_a^a^`__b^_```ba`a`aaaabcddebfdcaebd_ccaaab`\YZ^^ZXY_^_]a_`]\]\[[\YZ[XXZ[[[]^^\\[\[YZYZd{{iYQTTRRVSUNRTTQNPRQOPONOOPQUUQROKNONSOOMMNMNMQVQOPONSQPPNNRUSQQORSQVTWXTORNOPPTSSROORUTSRSVUSQQRQRQQQUTSUTRRSOPWUQQQQRRQQPQRWgkksibWSTTYXURTVURSUVWQPRPSUUNQOPPQOOOPPPPOPRRQQRQPRRQQSRRQQPQRQQRSSTOQQQPORRQRQUXVXTTRSRRQRTURQQQQQTQPRSRRQSSSTRPQQPQSPSQPQSNTQTSVVZZa_WYWSSRRSTTWWSRUSXVVVWWWXXX[YUVVTVXY^YZ]\]ZZ^^_``__``dc`^_]\[YXXYXY[_```a_cda`a_`]_cdccefddeddca`]]acbcbcfdddeehfideegdbbdda`aa`aacaa`bbcdbbdcfdcecdbbbdcaba`a`__^`__`_c`^`^^_``aba``abbedfceedbfcdaeada`b`]ZZ\][YX[^__`__\[`\\]]YXYYYZ[\\\^^\[Z[[XY\Y`|vh_[WURRRRUXVTSNQPNQOOLMRQQTTSURMNONQONOMNNQMPVSQPQOPQOOPQSVRRPMNQPQRTSUQRRQQOQQQPQQSXVTRTVSQPPRQQQQPUTSUSSRRPPVSPONPQQQQPQRViplumbYTRWYVVVSQQPTXVSPNQUVSSOPPNPPQQOQPOPPQTSQQRQPQSORRQSRUPSSSSRQSRSRRQPSSQQRTWVSVTUTRRSOSRWZRORQTQQQTPQQPSRQTRPPQPQSQPRPRPRTQQUVW[]b\UVVSTRQRTUTVTSTTWVVWXTWXZZZWYYVX[\\[Y[]\\Z\\^aabb`aaceb_`^][[ZZ[Z[]`aaaa`decda_`^_ccbcefdddba`_\\_ceddcdgfffgggedeeed`c`a``adb`baabbbaaeadccdceeebc``ddcab`aaa`__`^b__a`_^_^_^cb`a_babddccecdbbdcdbccdd`aca^]]]\YZ]]__^^_\_^]^\]XZZZYZ\]^\]^]ZZ\\\Z][\{vyqd[URQQWWWUSSQOSPRNRLMSSPTUTPNNNONMLOPONMOMOSVSPPNRPNORWWVTQPNNNNPPRRQPSOPQPPPPRURQXXVSSTQPOORRQQQOTSSTSRQQQPURPOOPQQQQQQRTZlptm`YTVTXUWYTQRSRTUTQORSSRSROMONPROQNOQTQPVURQQSUUURPQRTRQQSTTVTPTQVUUQPPSPPQVYUTVTTTPROSSSWUTOVSSPSSPQRQPPSRRQOOQPQSQQQTQSRSSRWdehhe\XSTTUUTTUURRTTUYYXYZYUW[\ZZWSW[__][ZZZ[\\YZaabcdbbcbdb^^_][^]\\^]]_bbbbaadgfca_`^_babcefeddbaa`]^acccceffffgggefedgdccbbabbabaababb`abbc`cbbbdddcbebaeb``aa``aa_]]_____^__^`^^ac__ba`bbb``bcccb`dcbcadcaab_b_^]^Z\^___`a^^_]_]\\]ZYYXY`^[^]^][ZZ\][Z[Uitjkok`YTSSSTVTTVURSVSROQONQSOSTOMPNMOMLNMMNNNOPMTVVPSNOQLPSYUVTTRPOQQOPOPROQQNQPQRQUVSPTYXRRTQPPNOPPQQOTSSTRQQPRPTQPPPPQQQQQQRSXghggc[URWWUWWTTRRRTWQPPOPPPQQPPPOPOOQORSUPU]ZTVTVXTQPPRSSQRRQSUYSSRTXWTSTTOORQUXUTUTTTRQQTVXWRRSSUQPRPROPQQRRVSTOSSOTSQQPRRORRRTf§fdQTSTTTURVTTSRSUUXZZ[ZWUXZXYYVXZb`]][Z[ZZ[\\\_cdfefdde`c[_]\]\^^]__^^_bccabeifca_`__`bbcefeedbbbb_`cddcceeefghggeedcfdaacccccbc_aaabbbbccaabcaabbc`acbac__c\`_aa_^__``_`_^_a]^_``bba`bbc`dcb`cc`aaccccbedda`a```^]X^\____`^]^\]][]\\VYW[\[^Z^^[ZZZ\]\YWRR]\\WYXWTTRPPSTSWWRRSSRPPNMPUOQNQOOMNNQOKMNONONOPPTVUPPPONORYRYTSTRTQPRRONPRQOOQRSOPSTPPQWVRRUPONOPOOPPPSTSQSPQPSQSRQRQPQQQQQQRSWbaaa^YTSVUUVUQQSSTUVRPOOQPPPPPPPPRQPQQTSQQTY[ZXWV[VSSQRUSSRRSRWVRRVUX\UTSVRPSRYXTTUVURQRRTXYTQSSTSOQRPQPQQQQSRRPPRQQSRSRUSTQQPQUa³abTTTURSSRRRSRTTUXZYZZVVWXXVYWUX^``\\[[ZZZ[\[]bccddfeefb_^^^_``_aab`^]^`_^^aehgca````abbceffedcccc`beeccceeefgfefddccdc`ccbcbca_bcbbbaa`cbabbbbbbcca_bb`a_`]b\^a`_`_^_``__^^_^_`_bcb`bdbcbd_bacdaaaddcc`bcb``a_b__\YZ]\]^^___^]]^]]^ZYWWZ[^][^]YW[\[\][XQQQUTQSQUVSTTQSURRRQQPPPONOOPURPOQLQPPONOMNNMNOOPOOTWUQOPOMOTTTPRTTUVRQRTRQSTTRQRTTRPOONONVVRSSQQPOMOPPPNRRPPROOQRRQQRTSQRRQQQQRSV[[][ZWSTVTTUTQPRRTVSQPPPRQPQOOSROQPPUWTRNQUVV\VVXYWQRQQVRQRTRRWXUXUSWZWUUTSQTS`ZWSUTTRRRRUXVUWVSSTQPNRPOORRQTRROOPRQQQRRTYTRRPRVV¯b^SVTTTRTSUSRTVURTZY[XUXYVWXVW]_^c^][[Y\ZYZ\]`babdegecddbba`cd`]bcd`]_^_]]_cfedb`abbbbcbcefgfdcddebdfdbcceeefeddedccccc`bbaaab`d_cbcbccdabba`babaaa__ba^`^^^___]___^_a_`^_^``^_`_`_baabbc`c`bbeca`bddcccbba__`^^_][[\\^^^_]^^]]]]\\\\ZWXX]^]^^\XX[\Z]][YORRSRRQQQVVVZYVSQPQPOQTSPONMOSROPQQPQPNNMNPNNNNMOOOTTONPQQMPUQPPRRQUSQSQRRTWUQRROPQQQNRNNNVRORSRPSTQOQPQQQRRQRRPRRQQQQSTPPQSQRQRSUVWWUVURSUSSTSQPQRTTRPOOPPQQNORPQPQOQUSRRQVZYYXVUWZXTSSQSQQTSSSTVYTUWUTUSVTTRUS]ZUVTTSPRPTZXWXVRRTRQPQPRPPQQOSQOPQPPQSRQPRSQQTUX[Zcxn`[SUTRTTUSTSUTXTVWWYZXVUWXWWUZ``_^_]][[ZYZ[[[]dbbegeccefdbefgd^]_a_`^[\^^^`cadedbab`cdecdfghgedefgdgecbcceeedcccdcccbcc`baaa`a`c_babd`aebcca`a``a_^^`a``_^`]__]^^_`]^`^`\]```]^`^^^`a``abaa_bbd`eacccbbdbdb__``^]^]\]^]_a]^]_]^][]]\]ZYX[]]]\[ZYZ[Z\[^[\LQQPSSRSSV]fute_QSQSQTRZTPMNOOOOPQPQQOMPOMMMNONOOPNTRPOQRNMRTONPRTUTRSQTNNPOQPOPPRRTWSPOOORPPPSQSRTPRRTQPTRSQSQNRRQQPRRTQQQURRQSTRRSRPRSQSURRSRQOPRUSRPOOPPPQNOQOPQRPPQQRSTY[ZZTSUV[ZUSSQSSPRSRVVVVTXb_[XSSUSRSTYUWXWWRQSPUWVWWVTPSRQRQRQPPPQPPPOPQROQRRQQPRRQPUZZ[\X[aXQTRSUTTUTWRSVTVX\YYYVWWVWWW^c`__^\\[Z^]X[[\`bcdfggeedda_adda[\__^\^]]\``bfcfecedddfhgddefffcdfbdeccbcddeecbbabcccbbcc`aaa``a`b`babc``cab`_b^c`_\]_a^]```b_\_^]^_````a]]^a`a]^^]`aa``aaa_b`aabbbcbbaccdcac_`a``^]][[]]^^^]___\_^`^\]^[YY[\]^\YW[[^\[\\YNOOQRTTRSUbzzbXQRTRSSXUOOMONOLOOPOPNLNOOONNNONPQPSRORPQMOTRQPPRTTTVSSSMNNOPPONQSSTQROOOPQPPQSRRPVYXXZPPSSPOPPORROOQQPSSRTVTSSPRRRRRQRSTSUQQRRQOQSSQQOOOOPPQOOPOPQQPPQRSTU[]_ZSQRU[YSRTQRPPQSSXX[Z[\beg\UTSRSSTXWVWXWUUSTVUVUSRSSRRSSQPPRQPQRRSPQQROQSSOQPQQQRSTTWYX_d^ZYUSTTSW\ZUTTUWXXXZVYWUTWX^a`_]^`][\]]^[[[XZ`ddgggcfcc^]_```_^```_`]_^`_efefdefeffhihffgfggceba`ddeeaceeda`b`abcbabcc`aa`````a`babb``aab`_a]a_^^_^__^_^````^^^`^^``_a]_]`aa__^][`a_^aa`_adaababaacbdccacb``^```\][[\\_^Z^_^^`]`]_]]^X[Z[]\\[ZYZ\\]\[\ZNNPQS[_[ZbvrZXTTURQYPPMNQOPNPOOLMMNNMONOOMRNOPSQPRNQOORUSQNPRRRSVVRNOPPPSSRPNPQPOOPORQPOQVUSTU^[ZYZOQPOOQOPQQRQPQPSVTRSTSSQQRSRRRQSQSSTRPQORPQTRPQOOOOOOQOOOOPQQPPQSTUUZ[[YRRRTTSQRSQRPRTTRY[_^_^beiZVYXRVXWWTVVWVURPVSSUTSPORSQSQOQPNPQQQQPPPPQQQRUQQQPSNRTPQVVXbksype_YVVY]\ZXSVZ\XWZV[VVTZ_d``_^bc_\\\[[\\\Z]^bghgfccca`]_cba``ceb^_````dcigfgeffgeggfgeccdebbdcdbefd`dcbb_^a`_`aaabccaa````````a`ab````a__`]__^^^]^^^__`^]^]___^_`a_a^^`\_b`_]]_`^]_aa_aca`abcbaabbcbcdbbb]_]^^_[Y[[\]]\\^]^]_]_^[\\]X[[][[][Y[^]\[ZZZLOPR]q}­¬zhfbXRQTQQOMOOOQPPOOMMRONNMOPPOQQOOQQQORRPNTSRQQOQPRSSRPNOPQRSQQPMRPONPPSVSOPUVSTW[]WWTTPPPPSRPQRSPPPQPRTVWVUTRQQPTTURQQSQRRSQORQQRSQSRPPPOOOQPPOOPPPPPRUUVVZYXXRQRTSRQQQQQRRRUSX[]Za`bffdb][SU[[WSSTTUSQQQUQSTPQNRRRSPSPQPPRPQQPOPRQQQQSPPQROSRRQQZ]^hhq}ub[]][b_]d_\WYYWZVY^cb_a`cfea_^]_^]^]Z]`dfhgjdhddb`cdcbdbddcba`accdihgiifgjeefhfedaaabdeefc`bdfcbd_aa`a^ba``baabbb``a```_`a`aa````a___]^^^^^]]]^___^]^\^^^_`^]^_^^^^^b^b]]^`^a___`^^aabbba_`bccc`cbbb]a^]^_[X[Z\\[]^]]^^^]]][[[YWW]\]Y[YW[^][\YZZOMQQh¤·»²³ÇÁ¢ljj]SRQONQQPORPPOOPOOONMNNNNOOPPOQRQPPPOOQSQOTNSOOPQRQQPNORPPPNNORMNOOSZZTNQYVSSWWWXTQPPSYTRSRQRSOPQQRTSUYYXTSSRRTWWWTQORRRQRQRPQRQQSVUTSQOOPQPNOPOPQQSVVWVYWWWQQRTSQQQPPRSSRTSTVWX]^dcejif[TVWXVTTUTUSQSQQRQRPPQRORQRRTQPQQPQQPOQSRRSSSPQQRPPQSRS_jfc^aourfZ\^]]_af`][XXX^W[`dabbcghgde_c`ca____acfgifiefgedgcfdccdccffccegfgheiggfedgdhgcffd`bcedcb^_bcaa`_ab_c````ac`b`bb^_a^`a`aa`aaa`__`__^]]^]]]]]]^___^^^\^^^^`^]^_^^^^`^_b^^^`_^_]_`]^`cbaab`_bccb`cbba`a^^_]ZY]][\^\^]\]^]]\\]]]YUX\]^X[VX]^]^ZZZWOOQTe ¥ÇÃ·ÃÎ³um_URRSPNQQPOSPONONPOPNPNNNONQORRPQPPPNNRUOPRROPNQROQPPMOPNMNONPPPOLOTZ\YQWZWVRUUVUQQQRVXTORPPOTRSRQRTUVWWWVTPQTSUSVXQRSSTORORQQOQQUYYWTSRQQQPOOPOPRSWXXYWYVVVQQRTRQQPPPSTTRSTUVWY[\acfldg]TWVXUVTSUVUSQRSRPQQRRQQRQROSSPOPQSQRPRQRQQRTRQRSRUURQUXifa[\_bavj_[Y]c_aedaa`YZ]a\_a_bhhghgefedcbfda`babefhhhgfgifehdegbegdfefeeegghgcffcbgdfdddeec^`beecfc_\`ba`_aa``a`ba_b`baa`_\^^^````````__]_`__^]]]]\]]\]^__^__^\^^^^`^]^_^]^^_^^^^]\^_`__^b_^`_b`bbb`accbabdb__`___][Y^[^Y]]_^\[\]]\]^^\XXXX\\YZ[V]]]_\XYYLORV_{ªÊÌ±¹¶~l[TQRQQOPOOSRRPOOMONOMOMMONPQNUPQSTQNMQTQOQRPPQOMSONONOLPONRPMQRQQOPRTXYQTSUXSVUURNRSPQRPPPNOQQQSSSPSTSUTUUPQTSSTSTWUSSTTSTQQQRPRPQYZURSVSUWTQOPPQRRWYZ[YWVTVQRRURQQPQPTUTRSUVWWZZZ^`af`bZTUWYTRPTWUTTTRRRRQRRRQPRQQQTROPRPQPQNPRRRRSPSUSTTQSTRUZaj^WWXVV[^WUY]^kfafd`]^^]``babaglkhiihedgedfecdeegegihfggghfhhbhdeffcefcfgfhfabeba`dfccba_b]]]]ba`b```_^]^_aa````a_``bb``_][]^`^__`_``__^^^``^]^^\]]\]]\]^__^_`^\]^^]`^]^_^]^^_^^^^]\]^_`a__^\^_b`bcaa_bdbccaa_`a_^^[ZZ^Z]Z\[_]Z[\[^\\]`]YXVWYZWZ\Y^_]_^\[[NQTU[k£¾Å³µ«vppjYUVSRPNOPPPPQROMLNMNMOONOPNRSUOQSNPONSSTPOQQRQQQOPOOOLOSQOPQROPSTSPORTTUROTXSSRROOQQPQQOQQPRRQQRRSQUVSTTUQQTUVUTSSUTUTSUTSQRRSTRRSTYWXWVWX\ZTPQSSQRVWXYYWTVVQPPQPOQPRPUVTRRVXXWYYY[]\`]]XTUVXTRRUTTUSSQPQRQQSQPQQQRPQRRPQQRRQPPSRROUQTUTSUUUVTWY[toYUUTWVUVW^\b\afc^]^`^^adc`djnkiiihddffffjffhghhgggjgjhefffefdedeefeegeddcadcaa`aa`cdb`a_^_^b__[[`^``\]`b`^___`aa``_a`_]]_^]`^`]`__``]_a``^]]][^\Z\]]]^__^`a^\]^]]`^]^_^]^^_^^^^]]]]^_`^^^\^___c^ba_accadca_aa^^[YZZ]Z\\ZZ]^[\^]Z[Z^]YYZVWXWX\]Z]_]^_\]ZMOPPT_r£²º«{cirk]]ZUOQMOPQNPQQQOMNMNNOPPLQSPVSQRQPRNRSRPPPOQRPPOOONPPMLQPTPQQQOTOQNOQOSVSNSSUTTVRQOONQRORPQRRPQSRTSRVSSUQQPQRUSSTSUTUSRSTRPSRRRRSRRWZYYWVW[\VUVVXTTTSSWWWUXTTPPRPNROPPTRTRRWZYXXXWXWWZXYVTVVWTSTVVTTSSQQRRSSRTRRRQQRQPPPQSQQQQQRRSTTQURTUUUSTUX\b¤õÈs_WVWYUV[Z\[]cdd\\^^_``aadjkilmjhhgcggghhhhgfdgefgggghheeecdedbegdhfeedebb_cca``adeeded_aa``a_X^__`___\a___`_]`a_``_`_^_^____a\_`__^a`__^^^]\\^\[]`[]^_^___]\]^\]`^]^_^]^^^^^^_]]]]]^_]]^\^___a^ba_`aebbaa`^``\ZZZZ]\YXVZZ]ZWZW[\\_][\ZWXXXW[\Z\`_`_]\]IKNOPWg®¼µjcef_ZXRRNOOPOOPPQQQOMNNONMNPNOQSOPOQTQOVQRPNNNOOPOQPOOOOOMNOQQNOOSSSOOPOMQTTRRPOPRSROPQPPRMRNQQSPSRRSTSSSRSQQQORTRSTXSSSSTUSRPOQRRTSTUVWYWWVWYYVWVYYXWTRTVYZWUUWUOQQPSPOOTORQSX_^YXWVURSTTTTTVVVTTVXWUTSSRRTTRRRSQRRRRSRPPQSURQSRRQTVSRQRQSPUSRRSW[b{¨¥r^[^YWY]XZXbhcd^\__bdaacikklnnjgiggghgggfehcegdghiifhjiecccddbcdddheddeb]]a`a^_cdedbbc``ccb````^a_^a_]]_^___`__^^``____`a^`_^^_`]__a^^_^^^^]]__]]_[\^_]a_\\\\\[]`_^_`^]^^^^^^_]]]\\]_]]^]^`__`^ba``acbba`^\b\ZY]\]\[YWXWXYXXWXZ\\Z][`ZWVWYVXYXZ]_^\^_]HLLNPUaoz ¶¾¼°yfkaSTUPSPNOQOONNPPQLOPMNNONNPQQONOPROPUOOOTQMNMOPOOQPNMLMONNQQNOPRPQQNPQSSQPQOROOQQQPRQPPOPQPSWQRSTRQRSRQRROOPOTQSTTURRUWTQQPOPRRPPSTRQSSWY\XWXYV]XXTTTVZYYVTVYWRQRUUQPQQPNRQW`[YWWVXTSQQPRUWVVUUXYXVSSSRTVVRRRSQRRRRSRPPRTURRRQRRUSQRQQRRRTRRQSY]jktsph[X[ZXX[WXXbfba`]^ceb`cemmlmolggghhggffe`bacgefggdedffffgeddcccdabca`aeab_a_a^c`cccaaaacbb`ab`__a]_a]``_^_^]\[]^]]\^_``_`ba^`^_^]^_^^`^`_\]^]\^]\\]^_`]`^[^\_[Z___^_^^]^^^_^^`]]][[]^\]^]^```__ba`aabbba`^\_[YX\]^]YYYWXXXVWYU[\[X^[^][VXYWXTY[]_^]__]IMMOQRbp½ÉÍÉÈ¸ziXWWURQOPQPPOOOMNNQPONOMONNPPOMORQPPTNNNROPNMPMPOQMNMMNMNOQSOPOOOOOPQMPQNPOQRSQQPPPQPQPOPNPOOOVQURRSRQPPOPPPPQQQSTSQTXZSSNUPQQROPQQQQRSSVXXX\YV\UWUTPXVYVWVWYYVSRUVPQRNQOQRYZ_[WWXXVSQPQSVWTUVVZ[ZWSSSSUXVRRRRQRRSSSRPPRSSRRRQQRSRSSRQRQTSRTUUW\hjlocXVUVY][YXX]bed_a_^fcacdgjkhmmhdfghigggefaab`bdeeeebcdddfgfedda^^abbbdcaaaafbdac_dbbbcbbbb``aaa_ab_a`^_^`_]Y\[]\^[^\]b`__````_]_\]^]^^_^_]]]_\Y\]_]_`^^^_]\^]_][]^_`]_]^]^_^^^___][[]^\]^]^````_baaaaabba`^\][YX[\]\YYYWXXXXWXXXYZY^][]]YXYXXXYZ\]^^^^]KNOQRX`r¦ÂËÔÒÛËÅ»gUXYUTSPQTRNPOPLMNMQOMOPOPOPQOOOQONRRMOPNPMONOOOONMNOLNOQQQQOMPPNPORPMSPPOPQRSRSQPOTUQPQNNPRRQTRTRTSROONOSQRPPQPSSPPSWXSQOROQPTPQQQPRQRRTUUX[WVVWXWUUXWVTVWWYZZTRRTUSSRPPTUY]_\ZXWUWSPQSTTWVVXVWZXVQSTTWZWRRRRQRRSSSSQQSSRSSRRRRSRSSSUUVTRTSTVV^c[he[XXXX\[YZZ[adcec`__bdcedggjjnkefhhfgfgfddcdb``a`bfcaaa_^`cddcda__cfeecbb`__gbdeaaba``cb_cb```_`^bc__^^_`_^\^_[]\_]]c_a`^^^`^^]]_^]^__^_\]\`]_]X_[_]_`_]_^\^__^^][^_`^^`[]\^__^_^]]\[[\\]^^_a`a`_baaaaabba`^\\[YXZ[][YYYXXXXXWXXXWW[_]^]][Y\YWVYWY]]_^]]LOQSSZ^t®ÈÐÖ×ÚÈ¼ª`STSTURORSOOQOPMNNPOPPNPPLMSQNONOOPTPNONONNOOOONMLNMONPMRQPPNMLNOOOQRNPSROPPQQSSRPTb]ZRRPPQRUSRRQSUTPRQNORSVSQPQQQRQQTWSPPRNPRVVVTPPTQRTSSTWWVVWXYWWYUSWTSUSRTURQTTTUVWURSW]_^\ZXWRXTPRQQV]ZZYYXWUSQQURV[VQQSRQRRTSSSQQTSSSSSRSSSSTTTYYjl_VSTVX`\V[ZXXWW`]YWZZafedcb__^aeedcgjjtoighfedededdccdcbbb``bd_`a_^``acbdaccbdccabda_^a__b`aa_``baaa_`aa`a_aa__``^_^^^]_a\]^__^]`^]`^_]^^]_]]``^__[]^^[\YV[Y_[_`^_\\__^_``][]^^a]_Z]]a__]]_^]\\[\\\^__``a``bbbbaabba`^\\ZXXYZ\ZZZZXXXYXXYYYXX[^\]]\[\[YYUXVX][`__]NQSUUX\v¶Í×ÚÜÙÅ´tZRSRSSQORQPPPQOMONMPOQNMPPPOPNPOQORSRRONPOOOPPNNNNNNNPPRQOOQNMNOOOPOMNQRQOPRSQPRRRX[ab\VQQPT\YTRRSVSPTTQTTSWZTWUPSRQPQTTRPOOQSVUWSRTVSXSTQSWXVRUWWUTURRWWTSPSQWQVVRVVUVVTSU[][]\XWUUSPQRPUZUYXUVTSSQRUSZcWNQRRQRSSRSTRRUSSTTSSTSSTUUU]^~mYSTV[_ZV[\ZXU][]ZXZ]gjfdca`_`ccdbejijnicgfec`cbdccdeccecaabaa__a```^_abdbab`babcbdb___a`_a`a_____`_bc__`_`b_]_^^^^^`aa^\]__^__Z_[Z_`a__^^^^^_`^]_][]^\YY\]\`\^^`]Z\_^_`_a_\[]]^^_\^^`^__^^_\^]Z[\\___``b`^`cc``abba`_][ZXXXZ\[ZZZYXYYYYYYYXZ[^\]]\Z[ZXXVYXX\^]]_^ORRRTU[x¡¿ÓÞßáØÂ¬fVRSRSQOOQPPPQPONOOPONOOONNUOPNPPNMTSRTQROOOOPPOOOONMOMPNRPOONPOONPNONMOPPPSVUUTQQQRWX]d^VQQTUWUSSTUVVWVUXUTWXTYYXXV[WUUUSRPOOPTWWVTXVRWUTUTUXVUSTTROQTV[XWQSSVTTURSSUUUTUTZZX\_[VTVSTQQURVXUTTSRSQQPSVRU`WMRQQRSRQSSWTTUSTUUTTVTTUVVVaz[TTV^_YV[^\[X_]^[Z[]fhgcca``adfeegkjfhedddcccbcbcbdbddcbac`^```a_\ba^`bdb_a_``aaaba`a_]^_``_``_^___a_]`b__ba____]_____^\\^_^^^]ZYY^_]`_^a\^_Z]\[]]]\[]\^_]]^_^_^\\^a^^`]_`^\\\]^\\^_`]_^^]_]]^[[^]___^_ba``__`baaca`_\[ZXXXZ\[ZZZYXZZYZZZZY[[]\]]\Z[ZXXWZYY\^]]__QQPRSUZp¾ÐÞñæ×¿¤x[VRRRRONOQPQPRQPNOOPOOPQNMQRPQLPPQMWSROSPPQPPQOMNNPONOPSQQPOQNOPPPNOOMQPRQSURPSWVTQQU]bb`]WSXX\XTTRRUWYVTUVWVTTRQTTY\WX[XPONQOPSXZTSXXWVSZUWUW[VURRQPPSTXZXRQRQSSPNRWWWTUXYZXWY[VRSUTUSTVSTSWRTSSQRRPTPRTZVPRRQRQRRSTVUTSRUUVTTTSUVWWWf¨®´^TTY]^XV\a_^[a__]\]_fhgcca`]dehdggigceedeecdbbbcbdbccbbb`aa]_`a``a]^_^_baa```_``ac_`__`]__`_`_]^_^`_^\``_`aaa`a^^__`_^\ZZZZZ[Y[\\__[`^^_]\\Z]\\^_\\]\]__^^[^^__^Z]`^^`^a^``]Z]_]\^^_`^\_^^`\\_\\^\```aba``bbabb`ab`a^ZYY[WWZZY[[[ZY[ZY[ZZZZ[[][]][Z[ZXXX[ZZ\^]^__RRPSYZ]m ÏÒÔåãÄn]TRRRRRNMNPOQPSRPNPOPOPQPNNRQPNMOQONWTRQSRSVPQOONONOPNMNPPRPPRPMONMMONKPPQTRQRPPQSTUTSY]^\`bZb__WSSUSPWXVTTTVXUTTTSQSURSVTQRPPOPP[ZSUVWXVUXWWTTXWQTQQPRQUVVVTSSRRRQOS]YSTX^dc]WSSRTQVXVVUSTRQUSRRTUSQORTRVaWRRRPQQQRWYUSSSRVTVSTRRUSSWYf¥ÐÌaUU\]^WV\cca^ca`^^`aghgcdba_degdegifgebefeddebccdca_e`aa`__d^``a``^]]\]```__`^_]b_a___b^_``^^__^]\]^^]`_``__^__]`__^^ZXZYZZYY[[\]^[[\\^^[]\\\^]^^[Y[^\]]]]][]``_[\]\___b_^`]Z]]\]_^^^^\[_]^\\]]^ZZ_```aabb`acb``abb^[ZYX[VZ\[\[X^[Z[YZ\[[[\[[\[]]ZZ[ZXWY\[[\^]^__RTRT[VYlÅÄ¼ÐÄ]ZYSRTRSRPOOPORQTSPNQOPOQQPOPSQPNMOPPOVSQURPPPSQNPPRONOOONNPQOQPMOMONOONNRSTROOQOPOPQTTTSSY_ddfj_YSRRSRRSWVUUUQSSSWWSSRTSROQSPOQQORX\YWWXUSTUVUTTUTRSPPQRQTUTSSRQTSRSTX]\Wc`bibaZTSSRSVZYVSRUTTVSQQVRSRORQSV_TRSRQQPQRUXWUSTSRUSSSQRRSSVW_Æ¿\TU\g^VV]fhdaeca``bdghgddcbaeegeffhffdacfdddebabccabbaa`````_`_`_`]^^]]^_^^a`^^]^```_^a``_a]]^^^]\[]]\__^^_^]]\[]]^^]ZXV[]^^\]\YY[\\\\\_Z^_\\]_\]Z]_]]\]^^^[[]^^[]]]]^_]^```]W\\^]____^^`^^\Z]^\[[]`c^aaadabc`_aa^a_YZZXYZ[[[\Z[[ZZWYW[[[\\Z\\[]]YZ[ZXWZ]\\\^]___PUTSURTcnZZWRQSTSRPQOOOOOOPPNRPPPRPOORTPPONPPQQVSQSRPPPPPMQQROOOPMONOOPQOOPORSQOOORVRQORRPPOOPOPRUVWY^aWTVSSQRRUVWXWWSTRSRUVYURRRTROPPPPPQQMU][[XWRQSTXXVVURTSRPQQRSTSRRSRRSSYfnnmnunjxumdYRSVWTTYVTUTU]`WQQRSQRQRRQU\ORROURSQQRV\[UUTQSRRRTRRQQQT[k^WX[`h^UZclmgdhfbbcdfhhgdeddceefegfgffdacecccdba``ab`b``aab``]_`^^^^`]]__\\]_`_`a`_``__`\ba`^_a^ZZ\\[\]\]^^`_]\[]`^^\\[]]\\_\[Z[[\[[]__\]^_]]^^_[ZY[^]`^[\\\[[\\\^]]^]\]a^`_a`[Y]\_```^\]]]_^]]]\\[[^b^a_`aabba`_a``]Z[ZYXWZZZXXY\YXWWXY^Y][\]ZYZ\[[[ZXW[^]]\^]___OUURQPR]rsfdgf]WUTQPRTSQQRQNOPMNNNRUQQPQROPTUPQPOPPRRVSQRRQQQQPMQQRPONNOPTRPNOONOQSTRQPRVSRRORNNQOPPPORORRPQRSRRSSSQSVV[XXWUSVSTWYXVQQRSQOPPOPPPPOS[[ZVVSQSSYYVZWRSQRRRVURTRRPTRUSS]u~w~}{sbTUV_\TXYUTSR[cYSTRPRRQRPQVZPRPQTSPRQSW^YVUTQRSRRSSSQSSTUQQTWVXX`fb_fknnkjjfdcgiiiigefeeefeffffgfec`cdccbcba``aa_a_`a^``_^``^c^`\^\^^_^^_^^__^__^_^]]__`^^^^Z\`\]_]\^]]_][]__`__\a]^`\\^[^]]^^_][[^^]^]]^_]_[[W\]_\^[\]\[^]]\^^\_^^^]\]_^__\[X\]^^_\Z`]^_`_]\[[\]a`__acabb`a^`_^\[[YYYYYZZXZ[XZZYWXZZ\^\]`XZYZ[[\[YXY\\_]^^``_ORPNPOR\`]XX\XWXSSRPQSSPQRQONQRSPRRSNQPPOPNTTQSSPQPTTVSQQRRRRQPNRQRQPONOOSSQPOMOPTUTRRVWSSQTSOONOLPNQNNQOOPPPOQQRRSSSVWXXWWQSVWXXYZSURRRRQONOPPNOPUWXXURTQRRUXZXWXWVSUUUVSQRRQRSQST_x~}~t_X^nn\YZV[TTVYVUSQRSSSRPPUZUQQSTPSVSUTVWWSRRQRRRRSSRTSTVVVVVUSWfjiiigkjiprgadgjiigghgggggffgffffec`bcbbbcbaa`aa_`_``^``_^^^a__^^^]^_a`_`_^_^_`^^_]]_a_^]\^^_`]]_^_\^_`^\]^^``^__`\^_\[[Y^]_]]]_\\XYY[\]^]]\ZXX_^___Za]Z_]_ZZ\^]`\]]^_^]]_]^_Z[\]^`Z^_]^__^][Z[\[\^_``aba`_a`^`]_YYZWY[Y[[YY[][ZYYYXYY\[]^YYY[\\\ZYWWXZ\]_^`__QPOOPPRUWTVZYXYRSQOPRTSRQPPONRVUSROQONPPOOOTSQTRPQORWUTQPSSSSQPORQRRQPOOORTRQQNOPSTSSPQQRYXWWOOOPPPQOQPPOOQPPPQPSQQRTQRTTUSROTUXXWVSRSQPTQQQOQOMPRQSTWUSTTSRSXYYY]]\TSQSQQRQQQQQRST_t~}|ud]gprdZYXXSSSUXSSSPTSRQQS]`VPPRRVUUSTRSSTSSTPQTSSRRRRSTUWXXUUV[mjknlimognrh``fiklijklikfdeddefffec`abbbabbba`a`___``^``_^^^`__^^^^_`]_^a`_]_`^^^^^^^^_^\\]]`_]^^^[^_]_]\\_^^`^^__`]\\Z[]^[\\\^\\Z\YWY\]^^[ZZYZ]]_`^X\^]]]^[YY]^\]^]_]__^_^]\^^\Z^\^\_]]_^]]\Y[]]^_`a`acca``_]`^`ZZYYZZXZZXY[\\ZYYYXZYY\]_Y\XZ]\\[XXXUWY[`_^_`POOOQVUSVUUYWWTSRPPPUQSQSQROOOPRTRORRPPPOORTTSUSRNORYTSSQTTQTRPPSRSSQPOONQUSVSOPPSSSRQQPQVVVSPRRQQPPPOQOPTUSQOQPRQRTTRSRRRPQRRVWVVTSSSRQSQRSQPNONPQQRTUUVSSTTWVTO\dYVSTYWPQRRSTRRSSX_ahotmtfc[l}wcY\UVUUW\YUSTQURRPNR[^UQQTURSRRSTQTQSRSRRTQSQQSSRQRSUXZX[bib]fhcgomkjc]`adhjhgjmljghccfdedd``aaabbabcba`a`_^_`_^``_^^^__`^^^^_`]_^```^b^^^^]^^^`a_^^]]_^]]_^^^`^_]\^^_^_^]^\\^]][^^\^]^[]\]]^\Z[WWXZ\[\YWZ^__^\[\^^]]^W[\^^^^\_\___^]\]^^][[^Z\]]^^[][[Y[\[\_`aaba_`aa^a_^_^ZYZZZ[[WYX[\[\YYYVXYZ]\\[YYW\\\_ZZYWWZ[]_a`_OOPSUYXUUUUXXVTQRSTOSTVQQOQNOPPSWURUROOOOOSUQTUTRSQRYUSTPSSRSQPRTTURPQPONPVX[UPQPSSSRRQPQTTURPRRQPOOPPMPTTVVTTQQRSTRVVUUUSRSSSTVVVTSPSQQPPRSSSQQNNRQQUVUUWVTSSTSOT[WTRTYSPQPUUSSQRQQTUX]dp|}~c^ZVgcaYVWYX]^WVTSSUQRPUU[ZSQQRTSRQRVSUVWRSSRVRRQUQQSSTRRSW\\^bd][\[abippm_^^]_dghhllkihhfddbbaab`abaadbabaaaa`_^_`_^``_^^^^_`_^^^_`]_^`_`^a^^^]]`^^]^__^^aa^]^^`\]\][\\\^]]`]^\]`\^]\^`^^]^^\]^___]\Y[VVYY\[WZZ^^]]\[[]]^]YX[]^^]^^`___\]]\]^^[YY[^]]^[\[Z[XZZ^^^_`a```ccaaca`__Z[\]]]]XY[\^]\YY[YXY[^]]ZYYZ[]_]]\YYXWY\_`^_MQRSUUVUTXZZYUTQPQRPSWUOPQPOPPQSTSPRSTOONPUUTYXVTRSU\WQRRPROQPRXWTRPORQPS\hfaXQRQSSSRSQPPRSTQPRRQPOOPPNQSSTUUZQQQRRUXTWVVTTRRRRTTUTQRRQRQOQQRTSSMPRQUWWVWVTRQSWVQQWVQPPRNPPPTTQPQOPORTUW[^a\fqd\YV^eklcaZVXTVVWTUTURTV[_XYRPRSTSRRUXWWYXSSQUSTQRSRPRRSRTUXg`\cc^_^Z`dimmea][]^_ffijlkhgfddcbacb`b`eaab`a_aa`^ab_`a__``_^^^]_a_^^^_`^_^__`^`^^^]]_^]]]\\a\_]]^^^_][[ZY^^a_[`_]__]__`^]___^^^^_^\^`_^^\\XXYWZ\XWXY\]^]]^^^^[Z[[_^\]_`_`a^\\\\]^^]ZY[]^^]]^]\ZYZZ]]__^a`_`babbbaab_]^`_]_[YXX\Z^\[WXYZZZ]^][Y\]]^\`]\\ZZUXWZ]__ORRRUXUSWVYZWSSSQPQQSRSPPQPQRPROOLNMRUPRPPUSTXXVSRSVYWSSTQSQUUWVTRPPOPQVhnbXRTPRQRSSRTRPPQRSPPRRQPPPPQPSSSSTTXRRRRPVWVXVVVVTVRTUTTURSSQTRRTSRSRSQRSVVVZVVSTSSTVTQQUVTPPQPPORORPMPOPRRSTW[WVWY`joh`^[^[bsji`XVPTUXWZWTX``Z]chVQSTRQRSWYVUVUUVTSRQSSQRQSSTRUUWW\^c]WX\dhhlldc^][^^`dijilkhfedddccbbbdbdadca_bb`abaa``aa``__]^^]_b`_^^_`^_^__`^_^_^^]_^]]]\\`\_]]]^`a\[\\^^```^`__]`\^]__^_`\]^^\]^_^`^]^^]^YZYYWZUWVZ]_]]]]]\Z[]]^^Z\_^_`a^^Z]][``_\ZXZ]]]]^^][YYZ\]``^`d^cdbcb``____`_^]^YXXX\^_]]X[YXYY[]\[ZZ]_]\_`^\\[WZYYZ]`RQRQUWWSWSXYTTTSRRQRSRQROONPQQRONKLKOTPPRQQSPRTYZVX\YSSUW[]][XUXYRTX][cvq_SQSQSQPSTSSXSRRQQRPPRRQQQPPRQSSSSSSWSSSRPUVVWVVWRUUVUUVSSVTSSUTUTSSSTTSTRTTUXXUUWTSSWUTUXVTRNOQOOQPRPPRPQQPSSVYUVRRT[[Y]cca[cmabga^V_aedmjfmsk][mt`RSUSTSTYZVUXVUVUUSQSTQSRSQTRVUVV^dgWUSUX]hpjb`]]^__dhgjhllfedddecdda`bbbacbaaaa`b__``bacb`a]`_]\__^_`_``_____`^^^__^]^^]]\\]`]_]]]^_`\[\\]^^`_^a^_`_^^`^^_`^`_]_]_]^___]^[]^]]]ZYWZYTZ\\\^Z\][Y]^]__\]^\]^^\]Z[\`c_`\ZXWZ[\^^`_\ZZ[\\_^`ab`a`bbdbcb_^^^_`_][WYY\[_\^ZZ[WYX\][X]\]^_]^_\\\Z[[XVXZ^QPSSUSUSTVWVPQSQQRQQRRQONPQPQNQLMKLMKPMNOONNLPTlta\XVX[ahoeUTTTUVWYdmiYUVSTUUUTRRSSQQQQURPRQSRSTRRQPSSRRRSRRUTTRRQUVVVVVVSUUVVWYWVYXTTVWWUUWTSTRPRSTSTWSTRURSVVUVYTROQRPPOOPOPOPPQPQSU[WVURPTUURVYahnrhZZ[eniojmfhpnykcbbrhYUVVSRRVZZWUSRTTUURQRRPRRRSRRUSWSV\k[ZSWW[drnfc_]___bdgjkiheeacedcdbcbbbaaaaacaa`c``_c`cb_aa_a^_^]aa___^a`^_```^]_`_^]^^]]\]]_]_]]^^__\\\]^^^___``aa^`_a`__b___`_^^]^_`_^^_]]]^[[]YYZW[\^\^[]^ZX\\^_^]^]]_\ZZ[Z\^^`_^_YZZ\\\]\[^\Y[\]_^`a`b`]__dacab]_^]`ba_YXZ\Z\^]^\ZYZVY[[]\][\^^^^^_][[[^ZWYX\STTSTSRVVVUWNSQTQTPPPOQOPQQQPONKLLLJMKLMKKLNMNX¯¢|f\YZ_jvWUQQPRRQTPSORRRUTVVVSSVTRQQOQROSSPQSRRQSQQQORQSQQTUSRRRUVVVVVVUVVVWXWVUWVTUVWVTUSQQQQRRSRRRUUTUTSPPRUUXXUQQURPPOOONOPQTTPSSVUVXPPRNSSUVZ_mtdZ\Y[]blb\WYinj^VWYlvlaZVVXWWUUTRSUUTUSQTQPRRQSSPTWRRRW_h_Z[ZXb\monebb_]_ddgiigfcdcceacdcabacba`abbbbb_ab_d`a_b`c]```^]ba^__`aa__b`__\\_`^^^^]]]^^_^_]^^^__\\]^^^^__`````^`_`_^a_`]^^_^`^``]\\\[ZY[\]^^]YYYZ\_\^^[^XY^^_[]^_^__\ZYZ]]\^_^\^]\]\]]Z\\]]ZZ^]^_]```_`]_`aba[Z__]^_`\WZ\^\\^_]\][Y[WY[[X][\_[_]\`][]]^]YYY\TRPRUTSSRSTVQUQUQWOPPOOOPQOOPOMKLLKMNJJLLLLNT_t£É·jehf²oYXWUTRRPRRRRQPRQOQRVRTWVVRPTSROPPROQPQOOSPQNRRRROPQRRRSUVWVUUVVVVWWVVUTVTTUUUUSTRPONOPRTRPRQQSRSRORQRQXSTPRQPQPPQPOQRSXWQRWTUVZRPLQRSY[]eaf^Z]\c^[b]W[_bhiYUX[gqm^^^WYSolZTSSSSTSQQTQRSPTSTUVTSSRXac[^cd`\[hlmddfd]`efjkigfedcbacbce`cbdb_`cbaaaaaaaa`bac`ba^a__a`^^_a``^```a_\]`]^_^^]\[[]_____^^^^_^\]^^^^___``_``^``_^^`__]^^_`^]^^[[Y[[Z[^^^_^^\ZZ\Z]_]^^_[[]^]]\_`^a_\ZYZ]\\]`_\^_ZZ]]_\[[__\Z]_a__``__``__`_^\[__^^_^\XXZ\\\^`]\\YX[XXYV][^\]\[\\\][\_][[[Z[SPQSVVTSQSOQTTURRUPQPMNOPSOOONMKLKKLLLJKJKJQaºÚÁ«¸°|dYWWURQPRSUROPPONPORRTSVVSRRSQPPQPPPRORRPQPORSSRRRRTUSQQTVVUUVXWWVUUUTSUTTUTTTSSQPPOOOQSRQPQPOQSRQROSRQRRPOPOROQRPQOQSVTQUUSUTXTQROUX\`cabj^]]_d_`c\X`dcgf^TV]muiXZ_c_W`g_USQRTTRQRRRSQQTTVUSUTUU\c`Z_bebY`nxjbdec]`dfijjhfeccbbeaddcadbabcbcaa```aabaaaa``````a_aa^`_a``_`^`a_]_]]^\\\[\]^^]_`^__^__^\^^^^^___`_____``_^^`__^^___^\]^[\^]Z\`^_^_^_^[ZZX[]]]]`][^Z__^_`^^^ZZ[Y[^^_a_\]\\[\_^\^\`_[Z\]_````___``^^^^Z[^^_^`_YYXXX[]_`_ZXZ[ZYXXVY]]^[]][Y[[[[^\][XZ[SSSWUUQSQSROQRSPRTRPOOOQOTNOOPLLKKKLMLJKJKMRd®ÓÅ·¶¼«®¥jWTSQROOPPPPPPOPNQRPOPRTQQQOQQRPPQPRRPQPPOQRRTSTQTSTWUORTUSRUWYWTUTTTTSTTTTSSSSRQQQPOOQSRQPQPPRSRQQQRRQPPQPPORPQPQRPRVUQTWSSXXWSPQOXYX[d[cba]]Z]Y\^ZV^ilkcWSV^mocTTSbbdcb_VTRTRUUUSRSSQSUTUTUWVTYfe[\]bilgiuqagdc^_behkhgddcabdddeddbcaadcdbba`ba`abb`abba__`a_`_^aa__`_^`_a^^``__^\]^^__^[`_`]__]^]^``__^^`_`_^^___`__^^`__^____^\]^\]^][]_^^_^___][XY[]]]^^\^]\]]__^]__W\^]\`_a`\\^^\]]]\\^`^_[[^^_Z]`a_a``]^_^^]^`_`__^ZWZX[[]bb_X[[[[ZZZWY\^^\\^[[ZZ[[\_\]ZX[RSVSURQRORQTSQROOSSQPOPPQQNOQONLLLJLNKKMLLNU\eªÎ¯¦Áµ£¥°¬nYZVSQOPPPPOPRUURSNPPORUVPSRRRPRPQQPPQQORQSSRVTSRTQTTTSSUVSSVTTTRRSRRRRQRTTSRRSRRRRQOOQRRQPQPQSTSRRRSRRQQORROOQPQRQQRZUTXYTTYYVURQSYXTW[TVTW\\V]ZYY[W`hpqeVTW[fj^TTTXUZbd_VTSTTWYVUSRRTSUURSWYWRW`dW\X`fjnqmwidjfc^`afieggdcdbccdedcacdbcc_bcac`a_bbabaa`___`_``_`_`a_^_^^_a```aa`^\`____`^_]__^^]_[]_]`_`^^__`_^^__``__^^`______^^\]^\]^]\^_^^^^^^_]YVXZ\^_][]a\^`]^^^]_]Z]\][^^_^\]^]_]^^^[[\]]ZY^]_X^^a`b``]\^]^^]_aa_^]YZXZ`]]^`_Z]]][Z[\YX\^_][\\[Y[Z[]\_\\YZQSRPRRSQQQOUSTSOUUVQPPOPPPOOQOMNLLJKLOMNLPQRRWw®È¤¢°¡º¬sZ\WURQQQQPRQRXYUVROOQOSSRRQQQPPRUQPONOQQSRQTTRUTWUVTUUUUTUUSURPRSSRRQPQSTSRQQSSTTSRPOPRRPPQPRTUTSSTURSRPOQPOONNPQROSXRTTTQWWTSUUY[WRT[[RQSUa_X^ZRXXY^cc\YUUVV\^YTUWWXZdsoZVTSUVYTUTRUVSUTSUVVUTZddZZZafddhhkcfkgb]ccejhgddada`ddccccccbbcac`ab`_ba_a`ac``^`a__`^^_`b_`a_^a`_`__`aa^_a^^_a`_^]^^_]^\a\\__\_^^_`^_]^``___^^``_____^^\]^]^^^]__^^^^^^_]YWYZ\]^\[[]]^_^^]^`__^\Z\[\`_^\]]\[]_^^][]\\[Y\Z[[_^ba^```]`^\\[\^_`^ZXXXZ_^]_a_[\a^^]\[YZ[[_`\]][YZ][[Z^]^ZXOQRQQRQROTQUQWSPVTSRNOONNPRQQPMMMKKJKMQOKNPOOT¯¿¤y¯§xaZVPSQPRQPORPSUTTQNNNNOOOOOQNQNQQQPOPSTTRSTVVUY\XXVURTSSSPSSQSPSRQQSQPSSQRTRRSRTTSQOQQRSPQRQSUVTTTVURTSOOQOOOONPQQORWUTQQSRSOQRQQWTPUYWSSSXhiWXWVVWXWX\VWYVURVTSUVYa`fyuj^ZXVUTURUVQTVUUSTVTUV\fle[[\bhedc_bagkd`_`dggeedbecbcedbbbdcbbdcbbbbbc`^aabab`_``^a_`a_```a```]^a`__`b``a^a^`^__``__^^_\\``^\[]`_^`^a]ab]_``_____^^`_`_^^\]^]^^^^__^^^^^^_]YYZZ\]^\[[]]]^^]]_^^_^\[\Z^]a^\]]\^]^_^^^^[]^]\Z^_\_`^`_^^^__\[XY\[]\YYXZ[\^]^_]YZ^\\\\\Z]Z\]_\]^YXZZ\\[][^ZYPSSPOPQPPQORY`XVVSSOOOPROPQOONLLKILKJKNMLNMNQVk¯jgonfs«¡qdVPPPQQQPNRPPNQUSPNNPOPPROPPTOQQPRPQSSVUXWYYUUVUUTRRSPRQROSRSSRQSSSQRRPRSRSQQSSTRRPRPQSPQOPUVWUUUXURUSNOPOPPOOPQPORWUSQQSSSRRORTYUR[ZWVTU[efXTUXVYWYVSUUXWVUUTSTUaumgqwsmaYXVTWTVSRVVUSVSTTUVXdmkga`dgfedbb`gic_bachhgeabddcceecedbdcbecaa`bcbab`a`````_```^`a_`````aaa__a_`a___```ba^`^]^^^]^_]]__^]\]^_^__^]_a`__`^`_`]\_`_a^^^^^^^______^^^^^^_]Z[[Z\\]\[[]]]^^]]^^^^]\[]^^]_]]]_^`_]_^^^^]]^^[]^]__^^^\`[^^_]][[[ZZ\YY[]]\]]]^\ZXZ^\[\]Z^Z\]_\\][XZ[\\[[[^][PQPOPPQOQQPUclg[YTQPPNOOOROONPNNLLJIJMPQPPNRVX`«f[cfeix¤£yr^RRRNNPQOPQOLRRQQPNPQQQPPPPSRQQTTQSWWUSWUURRTUUVTRTRSRQSPSSVRRSSURPRRSRQQRQQTSTRQQPPRPQQPQTVYXVUWVSVSNPPPPPOPPQPPQVURQRTTTSRPSSXVY\]RUTRTWWTSTWWWVZTVWYXXUWVVTSWgebht~zm]Xdpf[XVUUXTTTSVRVSU`_]aaeihkgcacdhcbbbccifecdacdcbbbedbceddddaa``aaaba``_a_````a_`__^``__a`a`_`a_`_`_a``^_``_]]]_`^`_]^`^^___]]^^^^^^__^`]`^]^^`__\]_^^^]``^^^^_^^^^^^_]\]\Z[\]\[[]]]]^]]^^^^]\[]^^]_]\]^^[\_^\_^^]_^]\\\\^__^_\\[_a`^^[^[[YYX\\_]]\^]^^ZXZ\]]\\Z[XZ]`[Z[[W\][]\]^]][STPRPPSQPPQYafe]WUSQONNPTNOPNQSNILKJMMMNNPRXb`v©±t[alhq}£¦|qo^QPOPNNPOSPLRPQOPNOQPOOPPPQORRRRSSTQRQTYXQTRTTWUSQSSQRSSRRSQRRQPRQRRRUWUQRSTRQTTRPPOQPQRSTXZXXSXUQUQPOPPQQPQPQPPQVTQQRUUTTSQTSWWZ\]VVVUTTVVSY\YUTVWU\_\USWSUSTXb\]eiqsqqh]\ba]YTTVTUVSRU[UT\e]\^bhhjnkccdccabcedghfdbbaadcbcbcccdefedccbaaabbba``_aa``aa___]a``a^^c^ab``a`_``a`^`__^`^`__`_`^a^]]]^___^]___\\^_^``\_]]]\\]]]]_^^]^a`__^^`^^^^___]^_][[[\\[[]]\]^]]^^^^][[]^^]_]\]^^[\_^]__`\_^^\ZZZ]^^__]Z\^ba^`]^^[YZYZ_a][\]\][[YWY[^_^]ZZW\\YYY[W\\Z\\^__\[USQQTSRTOOSWVVXYURUTOOONPRPQMQTOJNKKLMMJNNPU^^t®z^cju ­¥|nqaSSPPQQQPQQORPQOPPOQQQTRQQQPOQPPQUOOWUZcXUPQSRTQRTUSRTSTRORQPQQQTQQRSUXWUSSRQSTTQOOQQPQQSTWURUTTTQQPPQPPQRUTSSRQQVTQQSVVUTSRSSWX[\^ZWXYXVYXUY[XVTSUUW[XTVVUTTTUWWRW\ijehn_UWUUWWSSVVURSUdgYaaZY]hihihf``b``beggiheedcb`dcdbacdabcccbdcbbaaac````a_`_`__^___aba_a```__`a``_^]`a___]`_a^^^`_^]^a^]b]_^``_]\^^^^_^`^a^^_^^\[[[\]_]^]]\]__^_`]]^_]`^^]]]ZY[\\\\]\\\^]]^^^^\[[]^^^_]]]^^\\_^]^__\_`a[[[[[]]`_^\\^``a__\^[YXYYY^^]]Z^Z[^[WWXY\\[Z[YVWXYYXZY[ZZ[[Z^_[RQQRSRSUQTTSPPSRSTUUQONOQSTQOOSMMLKLLNMMMNNQXYq«r\bt£³¥qib^VSQTSSRPOPPOONOQSSTTTSRPRPOQPQPPOORUZbe_SSOTRSRSVUURTSRTSPPRQQRRRQTRUVTRTPPRQUQOPQQOQSTSRRPQQQQSPONQQOPQUXXVWWTTVRPQSWWVUTTSSVY[\_[XZ]\Y\[XZZWUTTTTW\ZXVUVXYZW^YXY`gjkelg^][XZXXXWVUTU]efhbZYX\hhdfb`]_cbbehjjigeddccaebcab`ebcdbcdbacbbabbbaa`_a_a_`a`b`ba_`^``_b^]`a_`]`__`_`_^```__``]]\`]]^`^_`a__^\]^^_`_^___a^`]]]_`b]]_^^^^`_^]^a_^`]__]^\\^[Y[Z[\[\^\\^^^^^^^\Z[]^^^_]]^^^\]`^]^__]_`_Z[[ZZ[\a`][^^____`]Y[YZ[WYX][]]\]^]\XVWWXWWWVWWYXXYYXYW[Y[Z\___PRTX[SRRTSRPOPQTVTUTQOONORRPOOOQKNLMNOLMONNR[bnum`k{£¢|kg`YTTRSQQQOPPQPOPQQRRQQPQQOQROPQRPPPQSUX]]VSSRSRTSPTTTQRPPRSRRTSQSSSRQSUTSRRRRRQSSQRQRSQSUUTRPQQOQRPPNQPOPSX[ZW[_ZXVRPRVYXSUTTSSVZ[]`\Y\a`[_]Z[YVTTUSSX][[YTUVXY[`a^Y^cgk_]pecfa\XXYXVTTY`lph\X\Xeoige`^babddhklljggdbcbadaadadcbcecebecebcbbb````_^````a`a````b``\aaa````_^`_``__]^____`a_^`^^^\`^^^^^^^]\]^^]_`]]]]^_^^_]__]]^`]^`]]_]]^_`_^__^^aa^`[[W[XZ[\_Z[[^_^]^^\Z[^^^^_]^^^^]]`_]^__]_`^Z[[ZYZ\__\[]^__``^\ZZZZ\YXXXXYY]Z\[[YWVUUWUVUVWXXXXXZXYXZ\\\[_]OQYeeYTTRSQQOOSWSTQSPPOPOPPOOOOPNLLMMLKPKPMS\nyf_st||jfcYUVTVSPRPPNQQRSSQQPQRQQOOPQTPPQRPSSSRRSRPQQQSRRSRQSPRRRORQPRQSRQRQQRVUUSRTTQSQSQSRPSRSPTTVTRQPPQOOQORPPQRY\XX[_ZVSSPRXXTRSTRSTY^YUTVZ^ed^c`]\XUSTTSSX_]^]STUWXZ^a^\`acgefyig`]UTWYWWV[fmj_Z[ZZ_kpkf__cecbgmklkhegabc`aca`cbaddccedgedcbbcc^a`a__````a``a`a`a````_bb`a_^`a_^```]]^_a^^`_]]__]\]__^^]_`^\__]\]^^]]\\]^_^^]^]b_^_\`]^`^]]^`_^^^\^`__^]\\WYWYY]^Z\_]]^^^\Z[]^____^__^^]]`_]^__^__\Z[[ZYY\^^\[]^^^__^\ZZZ[[ZZZWWWWZXUYWXUTUUVTWWWXYWZYWWWWYY\Y[^^^MPXcg^VSQSQNQORUSQURPRNMNPNNPOOONMKKLLNLLOOOSfi`qtuyyx|rpqbVVUSSRRPQRURSQRPOOQPQPNQTTUSPQQSQQRQSOPQQQRSRPQQPQRPSQTQRPQRSTTSQQSTTSTUTUPRRRQRQSQQQQQQQQPSQPPNNPPQQQRRTUWUZ][XXTTWUSRSSQRSW^[TRRTYV`dchh`]XUSUSRRY`^a\SSTVXZ]b_`bcbdegylbXYSXZ_]`cchga[[ZXV`onhd``ghf`fkmmigegbcb`cacbdaadccbeeeeeccb`bacaa_`b`aaa`__^```_a`_`_c_``__`_^_a^``_^__^^``__^^^\]_^__^_^_]`[^]_^\]^Z\_^^^__^__^^\`^^b]]^^__a[^]_^^^]]]]YZWY[]]^]`^\_^]]Z^^]__^^]^`^^^^a_^^__^_^[Z[[ZXY\]]\[]^^^__^][[[[[ZZYWVWVUVVVUXVVTVWVYVYUWW[[\\XXYZ\Z[[^_OPV_b[URSRQQRPPSVYTRPROOMNONPNORNMNLKMONLNQOQaf[frkifm}yeUSSPOPQPSYVROOPSNSRPPPQUWWUSQPRRSSTQSORQPQRQRRSSRRRQRRQQPSRSQRRSRSRUUVTSTURQSPRTOSRPRPPPRTSTOPQQONPQQRTSPQSSVY[VSUUXTQUVSRTY][SPSTTVSYc^nn\USTUVTRRZb_e[RRSUXZ^b_cdfabeh}yoe`]W[]_dihhd]b_ZZXZbkkea_agggbdijmjhghcdcd_cdabbdeccccedcdcbaac_a`_`a__]_a`^_`a`___^```a^`c`^`_^aa_```^`_]``^^a_]^]^__^]\^]^`_\^]]^]]_\Z[\]^^_]]]]__^__^_]^`^]^[\\_]^]^]][YXYZX\_^][_]__\[]`_^_`_^\]^]^_]`_^_____]ZZ[[ZWX\\\[[]^]^___]\[\[[[[YWWWWUVWVVZ\YXSVVZVXVYWXZZYYXVY[[]^^aQQU\^WSQRQQSQONQUWUSOPONPONOPNNMQQOMNPOMNPQPQ[hr{fZVccfkso[URSQOPPPRTQNPPQPPPQOPQUSTSTQPPQRRQPQQQQRPPQPROSPUQSTRSTPQTRURUWPSQTUVUUVUUURQRSUPRQSQQRPTWUTTOQPQQOQRUUSPOPRVZ_VSUSSPTQVST^`[PSSUSSWUVX\ieUQUYWUVRQWa`aZRRRUXZ^c`gfd`bei{zrhia[_`_dfdca\a[V[YV^kkd`bacfeddimkmghgeeacbdc``acabdddddecccbbb`a`ac__a__a```^`_____aa^__``a``^`a_a^`^__`___^^^__^__^^_^^\]``_]_`\_]_]`][Z[[\_^]______]]]^^`]]^^\]^^^^^]^\ZWVXX[_]\\[[\^Y]Z`^]__^__^]]__^```^_^^_^\[\\ZWX\[[[[]^]^^^_^\\\[\[[YWXXXVWXWXY[YXTUWWWXWUYXWWYYWWY[\\]\]SQTXZTRQRPRVTQNPTUTRPOOOONOOPNPQOSPNPQQMOQRRQWW[ouhcaXY^`itqkmfZSTSOOQQQQQQQPPQROQRNNQRUUURSPNQQRRSRQPPQQPQOPRQRUWUSURRSQSSRSVVTOQUUUUVUVTVSQSQRVSRSQPRSQSRRSSPQPPQOOVZXROOQUWZ_YSTPSQUSSS^k^XRTQTRTTRXY[a[RSVZXYWSR]seXURRTSTVbdakib`bejyzupme_bc`eda_^\`[Y[YV\gec]^^^`cdeiiljjjffecdaccadbdccddccbcddedc`ab`a`^]a`_`a`_a^_a_``a_```a__^_```__`^^_^_]`__^^`a^^^\]]_]^]``^^___]^^]a\_\\Z]^_]\`^^^^_]]]^]\]]]]^_]`\_\]^[YVVXZ]^^]]^\ZZZ^^`\`_`]``^_]_^``_^``^a_^^Y\YZ[\][[\]^]]^^_^]]\[\\\YXYYYWXYXZY[YXUWXXWWVUYXXWVWXZXY\[\]^URSUVSRQROSYVSOPTSSQOOOOONOOOPPRTSRNPRPRPOQQPQRV\[Z[YWTTWY\_YXVRRSQOQRSSPORRRRQRPSPQPQRSRSRQSNQRSRQSSRQQQQPOPQOSRUVUWQSPQSRRTTTSRSTUUWYVUUTSPQQRTURRQPRSRPPSRNQQPSQOSWZTPOORTVWWSRRPSSSSU_aa[XQQQQSVRPRUVWSRVY[\_WYQ^rjTRPQSSRU]d]gsogdekw{yyqicff`ca^[[[`Z\[ZW[ca^\]]]`defhijlkieeeecdbdddafacecdedcccddb`ab`a`a]a``^a^_`^a``_`ab_``a__ba]``^_``]``\___]]^`^^__\[\^^]]\]^^_]^_^__]__\_[]^^^_`]_^]^]]__^]^__^]__\]_]]_`^[VWY\]__^]ZVY\]_]^^^``_^^_^_a_`^_`__`_^]\WY]\]\Z[[\^]]^^`_^^\[\\\YYZYZXYZYZY[YXWXYYWWVVYXWWVWXYYY^Z[[[RNQUSRSQROT\XSOPSQRPOPOPPNOOPPQRSRQQOQSPPPRSPVVVUTWXTSVSRQRQRRSSRRQPQRRQQQSQOPRQOPRQOPPSOSSPRNPQSORPTQQRPPQPPQPQQPRVTTSRTSTRSTQRUSUUWYUTVTTRQPQSTTRPQQQRQOOOOOPQQRSPUWVTPPQQVTRQSOPRTUVZ]_ekhZUSRRSTRNTSTQRSW]ega[YTXijXQSPTSRUV\\cmldca]hurstngjjaa^[WX[_[\\[WZ_]Z[\\\`effghjljhfegdbddcaf`ccddcedcddcccdbba```a`a`a_`]caaa^a``ba__^`__^]^```_____`^^`^__\a_`]^]Z\]^``^]_^_]^]`^_\]]^_]]__\_a\^^^^_]^^^^]^^^^^]_]^]^^_^_YWXZ\__^\YX[]^]^^^_^^[^^^a`^b`]``_`_`_\ZYWZ[[YYYY\^[^\\\[[]^\]]]Y[ZZ[YZ[ZZXZYXXZZZWWVWYXWWWXYXXY\YZ[[TPQRSQSQQQQRTOPPSOQOOPOPPNOPQQRRSQPQPQRPPQRSURSSTSRQRUTSQQRSRRSRRSQRQQOPROQQOORQQPQQPOOQPQRRQPRQRQQQQNORPQQOPRQPPPPQRTSORORQQUPVSTWYWWVUUTRQQTTRRRRQQPROOQPPPQRQSSTSUUSTQSQQVUSRSQQTW_acciwoXSSPRSQSRRRPRVZejfb`\SUck[SRSQRRTW^XZ`_ZXZZ[eospmllqia_XSU[_]\\\XY[ZYZ[\\`fgfghjljgfegdbdbacddfdfcdgafedccdc`ba```aa`_____``___```]b^_^___`___^^_``_```b]_`a]``]_^`\]^^]___\]_]^_^_^]a_^_^__^_]`\__\_]^^]^_^]^^]]^^^]]\\_\a[ZVXX^__^\\][^]^___^^^``^`_^``]a``]a`_\XW[ZY[[ZXYY[\\\YYY\X[\\\\[[\[\Z[\\ZXZYXY][ZWVUWYXWXWYYWWZ[YZ[[RQORQQROQPQNPPMPTRNPRQOQQOPQRRSRRPPQQRRPPQSSUSSSRQOTRSTRSUSRTSRSTSUSPQOPRQPRQPQQORRQPOOOPQPPRRRNQSRQQRPSRUVRQPPOPPRRRRSSPQQQSWTTRSUZWZYURRQPQSSTSSSPPQQQQOQQRXYWTUTRRQRVQUTQTURSSPUU]dhfssZSSSTRSPURQSV^\aeec]VS`m`RQPRRSTVZWUUYWVXXYZguolnjigeYVRV[a`]]]YXXXXYZ[[`ggffhjliggfgdcdbbcddedfededbbcbcdcaa`bba_`_^^_`__`_`^_b]a^a^`__^_^^^^]_^]\^__]``__^_]__^c_^^^]_``\[^^]__]__]__]]^_]^a]^]]^`^]]^^\_\_]^^__]\]\[]]\Z\VUW]^_]]\]_]]^_^``]^^`_^``_^^`a]^`^^[Y[\ZZ[\]ZZ\YY[[Y\ZYXX\^ZXXY[ZZXWZ\ZXZZY[`]ZWVUXYXXXXZZVWZZYZ[[RPOQQPPPQRRPQOMRQSPPSROOOSSSSSTSRPPQRSQPPQTTUTTSRQORQRRQSUQRRSQRUSQSRPOQTSVQTPNPPRQQPPPQQQQPPQSQRQRRRTQRUUXUQQSURSWVTSRRPQRQRTUSURUWUUVUTQRQQRSTSUSPOQRQPQSTQY\X[WQTRQTVTRRSRTRQSS[cjaXp|q{mUUTUURRSRPSW^bdgcldWRW^YQQPPQSSTXUSVTVVXVW`jtomebgldVWZZ\^dfldWYYXZYY[[`igffhjlihhghdcdcdcededfedddbbbdfadcbaa_aa``_^`a`_``_]``^`^`_^`^``___`^^][Z]]\^][[\]__`_^b`]``a^^^_]][\^^^^]^]^]^`]\]___\`\]a\^\]]a^^^_`^[^\^^\]]]]^YUWZ]Z]]]^]^]^__^_^^^_``^a`__aa_``^_]X[\XYZ[]\]]\Z\[^[[[YW\[WZW\ZXYYWXYXXYXW[^\XXVUYYXXXX[ZUWYYXZ[[PMPQOPRTSQSSRQMRQQSPUUPSTWUSRSSQORSRSTQPPRUTUUTSRQPQPQQQSSPQQRQSUTQTSRRRTUSVUQQOOQPRPPQPPSOPOPRSSUWTRTRPRRUSQRSVRRVUTUTRSSTRQRUWTRUUTVVTSSOSNRQRTTPPPQRRUVTTRWZWXYSQQSWTURPQSTSPXbjeknq}uhepbUTUXVTQTQSZ_flgfqeUQRTQRRQQPQSUTUVUTUWWV_egrik\\fg[X_aa`baabYZ^\X\]Z^_bggffhjliiihhddddddeedefedddbbbdeacba`^]d``a_^`a`aa__`a__a___]``a`^``__^\Z\_^\^]Z[\\]]^`^_`__c_`^^^^`]^]___]__]]]_`_Y`]_`^_\\^[\_]_a^__]]]^\_\\[\\]][WWWZ[]]^_^_]__^__^[Z^___^_```]aa^`_^[[YWXZ\^[]`^]\\\\\[[XYW[\]\ZYVVWXYXYYYYZYWWWVUUXYZYY\[UXXXXZ[[NLQQNSRRPOQSSRNOQOQRU[UUTTSSQSSQRPSRRRRPRSVUUVUTRQQPOPPQRRPQQQQSUVSTRQQQTVVTTRRMRPSSROQQOSRSPPQQRTVUQPQQQRRRRQVOQQVQSRRRRVXVVYZXVTUVVVVUSROPNRRUURSPNSSUYWTVUVXWXWRRTXZSRQQTSWW[cfncj}~rg`lkZTRTVTSTQQWZ`sqrmj]SQRRRQPRPRTWWUSUUSW]^^dwwl_bab_]YX__dfe\U[^ZZZWZ[[ccbehieefikjjiieeeeddfedefedddbbbddacba`^]c```__`_b]__^`__`a`^]^``^`^^^\`\[Z_^^^\^Z[Z[]]]__^_^``^b^`]^\[`]_^_]]_]]^_^_^[\^^^^]\Y\]\]a`]__]\]]]_^\XZZXZ]ZWXY[]]^`\b^`^a_`[\]^^^^\_a_`_^_``\`^_[YXY]\][^^^]]\YYZY[\\^\ZXZWWX\Z]Z[ZWY[[XY\[VVZZYYYZ[WXWWXZ[\NPRPUUSPPORRRPOONOOPUYPSQRPRSRRRQOQOPPTSTSTTUWWSPQROOOOPQQPQQPQRUYUTRQQPSUUSSRQPQQNQPPRRTVTVSSRQQRPQPPPPQQSSUSQRUTUPTQSNSYVVWXWVUSSWYXUUVQPQORSURUSPPPTUVVTSTVWVUUTRXZXRQORSVX]qibc\xzo]TVTTTVVUTTRT[Zcuztoh\TORRRQORPSSXVTTUVU\eihiqye^a]d]][XUYZbc_Z]c]XZXVW[dd`chleacelmjkjjgefeegfdffedddbbbccbbba_^^b```____a]__^]]aa```^^`^`^\]_^\]Y\^___aa^[[\^^^]^]__^`a^_`[[^Y]\]`^\^^]]^^]^ZW[[[]]_a^]Z]^``^_^\^[][]^][XWWY\ZVYW\[]^`]]``_a``]][]^__`_`_^^_`__]_^]\]VYZ_[^___^][^\ZZZYXYYWY[W][\]\[[\V\\\[]_^XW[ZZXVY[WXYVXX[\NPOSURRQPUPOPOMPQPQSVUQQQPPSTUQTRRRQRNPPSQPOPQSROPRQQOOPPPPQQOPQU\WTQQQPRUTSRQQPQQNQQQRRSVSWUUURURQQOPQPPQTTUTQRRSSURVORUWQSTRTSRSTUUWVUUQPPQRTRRTUPOMPTQSTSUUVWTTY[\ZWTRSTWZag~fp kaa\VTSTSUUUSRSRYikhlsuus`UTRRQPRSRTRWRSSUSWhjfojfvpf^_]Z`XYYUX\`^_\a^YZZZ^abcbcdfibadimlmkhjegeeegfegeeddcbbbbbbba_^^a```_`__`]__^]]``_____``^^_^_```_\a`^]__]]\^^_`]^^__`_^^^_^][\WZZ`^^`\^]]^\^\[[[[]]\\^^]\]Z^^^]_]]^[_^\ZXVVWZZWWZ\\^^_``]``_``_]]__`^^_]]`__``_^_^_\\XX[^\\`^_]_\Z]]\\ZXY\[Z[[\\\YXXYZXZ[YY]^[WY[\ZZZZZXXVWYYX_QPSRQPSRQRPOPONLSRRTTRQRUSQRSRTUSRSSSORROPQRQRPQPQRRQPOOPPQQPQQQU_ZUQQQPQTSSRQQQQRORRRRQRTRTSSRSUSSSNORRRSSTSRRQQSSURUVUUTORTTQQUTTTSSUTRPPPPQRQTTTOPPOSPSSUTYTWUWVX\[VSSW^dfcb}¢rWSTSRTVURTSRQTPS[w}}{q]STRQQSQROSXVQWRVUXigexujpme_aaa__ce\WY\ZZ\Y[\][]^`bccebdgfbfllpklihgjffghgffeffeecccbcbba___````__^_`^__^^]``____^^_^^_^]a`_^^``^]_\`^^`^__^_^^_^a`^_`_^_\YYWZ__]^_`]]]^\X[]YY[\___^^]]\[[]^_^^]^]]\UUVVXXYY[]]^``]_b``a_b[__^`^^^_^^b`a__^___]^^YX\_]\]_`^^]_Y]]^\\][\[Z\]^\\YWZZTVWWZ][\VW\]Z\\[YWXXWXW]]ORTSQTTRPQRPNOORORROPPQSUSPPSUUVTRSTPQPQKPPPRQQOOPRONOONOPMPPPQRPXWUQPQPQTRSRQQRQSPSSRRQQSQRQRQRTSRPONSTVRRRQRRQQSWUUWVTRTRUTUTRVUTTRURPQQQQRQQRSTQQSOOQSUSSSQSTVUSQ\[SSTWYceYU\o~^Q[`YUZ]_[^XUTRTSTozhXRSUSRSRPRUXURUQVUVY^fc_mi^^bcaedbihcWWZ\YY][Z][YW]befdbbdfdcijnmkjjikgfdhfgfegfddccc`db`aa_`_````_^__^__^^^``____^]^^__^]`_^]^_`]]^`__``^__a_^^_______^_^^[XVVY`^_]][][]\\[]ZYZ^\]\\]^^^\XYZ]]][YYX[YZ[YYVWUY]^^^_a_`^aa`a`^a_]_^_a^`a___``_^^^__\YX[_^`a_^`\^]\\\\]][\Z[\]^\\[Z[ZXVX\][]]VXZ[\]\[YVYYX[YY]OTZVWZTSROQPOLPRUOQMPPROQQQPQOPSTSRQSSROOPNPPSRQQRQPRQOOPPOOOOPQSTUTRPPPQRRQRQQSQTQTRQRQPQPPQRQRSSRPOOSSURQPPUQRSTZXXXTUTTVUSVRRUUSPRPSMRQRRRRRRSSSQOPPORTTRQQSPSQRTVWRQWWddYUSTWc}{bZf}nbgnn`_\WSQTTRa©§|gTSRVTTTTSRUWUTVSVRRSRTYfpja[Z\^_bbb`_W]XZXUX][W]W[\`adecbadd_cglnmhiljehhifggdhdffdddbdb_`a`_^_``a`^_______^``____]\]^``^^`_^]^__]]^_____^_a__^^^a__^^_^`^]^ZVVWWZ[]][\\[`[_]ZYWYY\\\ZXZYXVUWXXYWVVUWSWXXXTVVY\]^^_`_]^_a```_^a_]^]b_^`^`^_a_`[a_^]YWZ\^\___\[a\][ZXY^\ZZ]\\Z\\[]`^ZZZ]][^\XXY]\]^\XYZYY[[XZOPTVZYTPQROOPMNTSPOORPQROOQOPNOSQQQSRQOOPPOOOPQSQPQRPQOPPOOPPPPQPSTTSQPQPRQOROQQPPRTRQSQOPOPQRQQRSRQPQTSTRQPPVUVWXXXYVTTUTTUTQTTUURQRPPNRQQSRTRSTSPQQQPPQRRRQPQQQQSQSSSPV[naVSRTUW^r|]g}}{h_\WSRUSUVy£eSTUSTVTWSRVYUSTVUUSTTSXij]\Z_]\abdc\XXYZXWTWXUWYW\`]\dfdddbdcbdelmiiljgigfgghegegdgedbaa``a`^]a_^```_`ab`_`_``____][\^a`^^_^^]^__^]^_____^^`^^^^_^_a]^^^^_]\YYWWXVX[\][[[]^]]\YY\Y][\ZYWUUWVVWVVWVWVVVVXXWYVWUZ]\]a_^]_a```_^]_^]^]__a]^]^_a^^^]_`]ZUX\^^_`_]]^]\][[X]\Y\][][]_\^^ZXZZ[\]^[UV\_[__][X[YWYWXYQPPTSQRRQQNOPNKQSNMRRSTPPNRPNMSPOQRXTQQNOONPPSNQSRPQPPOPOQPPPOPQRQQQSSQROQQOQPORPPQRRQSQOOPOQRQQRTRQQRTSSQQQQWY[\\YWWUSTTSSTSRTUTTSQRQPQORTSSRQTRSSQQRRPORTRRQPRTRRTRQRQSVd`USSTTUW^j}l|yg^WRSRUWUm¢w\UZ\YUVVWSTV\UUUWXTSTVYZmhXWUTY_`eebZVWY[YXVWVWXWW^`\Zcegebc`eea`chiikjjihgiggfgbfggecaea`ab`_`_`_]```^_a__^b_^____]Z\^b`^__^^]^__^]____^_^^_^^]^^^__]\\^]\]^ZZXUWXVVX]^_]]][\\YY^[][_]ZXWVXZZXYZ[ZXXXW]\[[\_[VX]\`^`^`_a^__^\[^_\[``a_^^]__`_^^Z[^^WWZ[\[^]`]\]]\\[Z[\X[[\_^\[_\^]\[[ZXZ][ZXU[^^\]aYWX\ZUWXZQRQNPPRPSOOQQNNPPNNRQPSONQSQPNOPPPRWQQPOPPPPQQOOROQOPNNOOOQOPOQPPROPSTQRRNPQQPRNOOQOPSPRPPOPSTQPQRSRRTUSRRRQRX]_`[TVVTSTSSSTSRTTSSROPRRRPTSTSURRRTSSRQPPNRQRSRQSVTQQRRRQSU^s`USTUQSWYpvyaRSQTSVTdv[Y]bbXQTXVV\ZUVTXWT]ZZ[bocXWVYYc`a`]XXVXZZWYWUYXWY\YZ]_aeecbbcffa_aghiiklijijihheddeccbcccac_a`]_a_``^a_`_`^]^^`]_`\[^__`_`_^^]^___]___^^__]^]]^^^^_^]\\^]\]]\[V[X[\XYYZ_a^[YYYWYZ[^][\[YYWY]\]\]\\[YY]^Z\^__^_[]\]_Ya]]`]^^]_\]^^_^^__^^^]^b_]][]]^YVZ\[]^^]]]^^\Z[\]\ZYY\_[_\]\\^\\[ZY]_]\ZWY\^\]^ZWV]YXWWYPPSRPQPPOPPQPONSQMLQRQRQQQQRNNOMPPNRNMRQQPRPPPPPQQOOOOMNOPOQPPPROQQPOQQPPPQQQQQRPQPOSPPQQPPQRQQRQQSSSSSTTSSRSYbd]VSUUSSSSSTUTSTSRSROPRRSRRQTSRRQSQSQSPPQOPOQTTRSRQRRRSRQSY_urVUSTUUZZjomgTUTSTSTcu{lkkcfg^UUZ[YWVWVVWWU]_\bgzfVUTUY\bg\^dZ[UVYWWUTUXXZ[Y[___bccfdbehhebcfhghiihijihigfeecbc`_a`b_`^^^`__`_`a__`]a]]`__b\[^__``^^_^^_`_`^`_^]^__]]]^^^^^_^]\]^]]^]\[W[X[\YWVWXYXYWWYZ\\YXZWWWXWWYX\^][^]][[\[WZ\[_^^^]][^__^]`_^_`]]]]]^_^`_]^_`_^a^]]X]ZXV\^\_]]__^]^_\XY[\YXY\]]\][]]\_][]Z\]]_YWXZ]]^^ZYW[^WWWYOOQRROOOPQOQOPPQPLMOOQQOPRRRPNOPMQMQROPRORPPSPPPPPNNPPMNPOOOPOPQRSPQOOQQPPQQQPQQNPRQPTRUTPRRQRPPQRPQRRRSUUTU\ac\WQSTTRSSSTUUUSSRQSRPQRSTSRQSRRQRSSQSRPPSRRSQTVUUSQQSSSUSQT]edWWUQSU[Zs{gYq}kbemocZYXVTXforarrhfb\VW\]WTUUUWXTRWW\drxeSTXZ[Zic_`a^Y[]_[ZXYWVX[\Y[]]_^cfhfgcckiabfiegfghiiikgeedcdbbd``b`_b]a_b^```````__`__`a``_\^__``_^]^^__]__]`^]^_`]]]^^^^^_^]\^^]^^][[X[Y[\ZXWXXYXYWUWWZYXZYWVZUXY[YW]^]^]][[]\XZZY^_]^^^[_^`^]_^]_`]`^]]]_^^_^^^^_`_^]\ZZXYW[^\`]\`^]\]_[WXZZ[Z[[[][]\\]]`]^[[[\`]ZWXY]^^]ZYY\\YVYXONPPONNOONNONONNONNQOSNPSRRQPRQPPPNOQSQOPROPOPQPONONPPOOOQQQPPPRRTSUOPRSPOPPPPQQPOQQQQXWUQQTRTQQPSQQRSQTWTWbc^ZTSPRSUTTTTVVVVTRQQSRQRSSUTRRRQRQQRRQRRPRTPUNSUWXUUQRSQRTSRT^j`VVUSTSY[lrmhXVUXml\VWVUgrdb[\ZZWUV]ZSRSSSUVVWY__cnaTSSY`]]a]a_e`Z\]d`[[[VXY]\[Y]]\]^abdeddeldcfghfgffghijhgecccbba__b`_b__a`^ab_ab`a`_`^```_``^b]a^a``^_^]\\\]^]\]^^^^]]__^^^_^]]_^]_^][[Z\Z\\[YXYYYYZXVXXZZYZ[][YYYZ\ZXXXVZY\__\ZXYYYZZ]\[[\\^_^]_]^`\]^]_\^\`^`___````_\\[\ZZYY[\^]__\_]^\ZYY\[Z[[\\\[\[]^^^^]Z[\[_\\XWU\^`][Z\[[[ZZYPPPOONPPMMONPPONLPORUSRPRRPPPQPPOMPQPRRQRQOPNPSPMNMNONOPPPPOQQPQUTTTPQOONORPPQQQPOPRRSSTQRPSRUQQPTPQSPTVVT[a]WUQOQPPTUXXTTUVVQRPRSRRSSTVTRRQQRPQRRQQRQSSPTPRTUWUTVTVRQSSS^gg]UTTRSUWZf}m\XYVhZUWWSaw_VU[XRSUQZVSQQTQSVUXbljigYVTUWb^___a\^^XUYY\\ZYYXY_b_ca^\`^\[[]acddgeghgfgfjfihghfcbdcbaaa_``_^a^^`_b_]_`a`ab``````_`_a``_`^`a`]]]V^VZYZ[]_]]^]__]^]]^]^`^^`^\[[[\[\\\[ZZZZZ[XXYZ[[Z[[][YXXY[\XWVUXXZ^\[ZWWVXWXWWYZ\[\`^]_]^_^^^__]]]^\`^__b_`_^]]\\\\[WZ]`Z_^]]^^]_WX\]]]\\\\YX\\^a]]^Z]\]^\]XVUX\__^Z[\YYZ[\QPONNQQPLNOOQPMMNOSUQRRTQRPQPQPONMORPQPPSQPOROTUNMRPNMNPPNOPQQPRSQQSQPPPQPPPOOQPNNPPQSSTTRPPQPQQSTSQRUVUSUYWVTQQPPPOQSVXQRVRURRQSSRRPRUWTRSQQRPQRRQQRRTRQTSRTUUSSTTURSTUSTc^WUUSSTSW\duwjZ[]cjXVTUQp}ucYY^WTTSRTURQQRRRXVhrpvveWWVU\_[YZXVVXXUUTUU\ZXY[_bbaefc``aa[ZZ]cdffegieegdhchfehefccddc````_^a_`]a^_`_^aa]^``a`_a`^_`^_````^]_^]]ZY[XXXZ]`^]_^]]]_]]]]_^_^]^\[\]]\\\]\[[[[Z[ZZ[[\\[\[][ZWXY[\YXWVXYZZVXTWWW\YYZZZZZZ\]]]]^^]^]]^^[_]^\^\`^a^]``^^]^^^[WX\]_^^_\^\[\XXY\]]][Y[ZZ[[]_]^\\]]]]]^ZVVW\__`[Y^\YY]^PONLQQOOMOPRRQMLNPTUSTRTSPPTQQPPMQOSPPOQOQQPRQVXONOPPNOQMPPPQPPNQSPOQQPQPOPOOPQQOQQQRROUWURPOPRSSTVXURVUSWSUTQRRRQPRSQQRSSRSRSQSSRRRQSSVSSTSTRPRRRQQRSSQRSRQSUTRRRTTRSUVUXhi_UVSUSSX]lsZUY_sdTSSR\onaachge][[TRSRRPSQSQTQRYitxre]XXYZZXVXVVUWVVUUQUUZYXV`bbbefca_^`][Z]ddciidgefgfeeggcedcddddabb`aa_aa^^___`b`a_^]a`a``a`^^_a`__^]^____]\[WVZYYY[_]___^^__^\]][[\\]]Z\\][[]_^]\\[[\\\\]]]\\[]\ZWWX[\ZYXXYZZZWXUWY[]^]Y^ZZZXYZ]^\^`_^]]^_][_`^^^`\_^_^^]^^_]][XW[_\]`^\\]^[YW[][[^ZZ\[\^YZ]^]\]_]]]]^]YTVZ^_`\X]]XZ]^OOOQRRQNONRNNOOLNPSTRRQPRUSSQPPPRNPSONROSOSRRRSTQRPQPOPONOOUPPRPQQPQRPOPPOOOPNONPPQPOTQVXYURSTVTRSUTUQTWVWTQQPSPTSSSRQPRRQRRRRQSSSSVRSQQUTSSUQQSSSVTSTRQSSRQSTRQQRTTRSWXX]mukm^\USSX]xcTWVds]WTTRchZRWYdZc`]\WUURQRRRRQQSSXqssxf\`hifa^_]YYYUUVUTUSSTVY[U\dbgdba_^`c`]\^edbehddffiecdedddecbbbb``b`a``_`_____`]_`^`]aaa_``__`_``_^^_^^`^^^_ZXWZ\]ZX]Z^]`]a]]][ZYX[]\\]\[^`[]]`^\Z[\\]^^^_^^]\[]\ZVWX\][ZYZZ[ZZYYWXZ[]]]Y]]]Y^YY[`[^_^]^_]____a_^`_^^]^]]]`]`]^\XWY^`^^]]^]\[VX\]Y]\Z\\]ZZZXZ^]^^_`^]]]\[WWW[\^[Y[\YYZ^PPPPSOPNQOPTOOONPRTUSPORTSTTRPPOQRQPPNQQQTQQSSPRUTSQPQQPORUTQPPPPPQQRONPOQPNQOOQMRPOQRQTVYVRSUVUUTRRUUUVXZTRRQQOSVSVPPQRSRRRQRSSTTUXRSQRSQSSSSSUSTXVTUQQSSRQSSQPQRTSRUYZ\arwfeUSSXb{hXV[hiXVUUPnbTRSTZ^^da]USTSRSTTSRQSRT[kh`TTU]ktophhdXUTUVTSRSUUWZ[][afd_]\^_a`_]bggddfegdfgeeccjbcfbbc``__`_`^a^aa__^__``____`__^`_^^]]_^[Z\_^[]\]_\]Y\]`]__^[_[\Y_Y\\Z\]]]_]^]\^\^]^]`][]]]Z_]\]]]_^]\^]YUVX\]\[Z[[[Z[ZYYY[[]]]Z]]]Y\YXZ_^]\^\^_^__^a`_``_[\`a^^]^[a]]]ZWX\^]]^]\]]ZVX[\Z[]Y[Y\ZY\[W]^_^`^^^\\\ZXWUVZ`]Z[\\V[\PPQRRQQPQQSPOMOQLQUQPQPQRWVRPPPQQQQPQPOORSSRSTN^h`WQRRPPQRRROPOOOOORQPOOSSRQRQQOPOQPQPQSSWUUTWWTUUTSTTUVXWSSRSQQRRTQSQRRRSPTSQPQTUVXUTSSSPSSQTUTSTVWVTQTSRRQQPPPRSTSSW[\afwneUSSXgjWX[j`VTUTXk_SQUR_b\if^TTRQSRQRQQQRSRT\lf_[USUT[int||iWUSUVUTTV[]YYYX[]_bXZ___^[Z\befedffgghggefgfdcdedaa__a``a_b]b^_]^____ab^``]_]^]_]\a[\WYZ\Z[]]\]]]]^^]^a\^^`[^\]\]]\\\_]]]^^\]]^]]^`]\^]\\][^^]]a_[Z[\\UVY]^^\[]\[Z[ZZ[Z[[]]][]]]Z[YXZ^]]\]\^_]\_^a_^`_`_Z]`_^^^\`_^^\XV\\]^][\]\ZXXZ\[Y[[Z[[][\[[[[]\]_`^[ZY\ZWUVZ]][Y\^[X[PPQSTRSSQVWRQNNONRPQSRRSRUQMNRSRQPOOPRRPQRRRQRRf|mYUUURRQSPQPOQPOPRQPVQPTVSRSRQPONOPRSRRUVSUXXZVVTVUVUSUWWSSTSSRRPSTRRRRQQSTRQPRTVUVUUTTVSTSQUTVSTVWTTVSRTTRPPQSRRSSUV[_ak}¾·veUSSZlmWZ\lbXWUXYf\RSSWfd[nh]SQRRUTRQRSRSTSSUV[bZUTRTRZ_err`SWUVTTVWY_c`[[YVY\YYXZ[ZZWX\`dhhfhhffhgefgeffcdbbb`a`_a_`ab_ba`^`__a_``^_a`^\\^`^]\Z[X\Z^]]]^]^`]]_]]^`_^^_]_\_\[^^]\]_]]\\[\__^^^_^^^\\]^]a^^__]\Z\^YVX\_]__]_][[\[Z][\[]]]\]]^[[ZXZ]\]]]\^_]\^_____``]\\^_^]`^_^a]]UXZ^^]\\\]^ZXWZ[Z[\[[[Z]\\^]Y^]```_\Z\X\][XWXX\\Z[]^\]RQSQSWUTSUTPONMPSNQQTQRTVQNLMRRPPOOPPPRVYTUQORU`ea\YXXRQRSQRPOSSONPRRRSSQRQTPSRQNMNOOQQQRTSQXVVUXTVRUSUVWTSSRRSRSPRPRPRRSQQRQROQQSVSTUUUUTUTSSRUUVWXTVTTSWTRQRQQRQRUXYY[[f{ÆÎYUTT]qlW\]nd[ZU\ZaWTUWcfilp`ZSTSRVXTSSSTSRQRTS[g]UTQRSSTYfdYRXUXWZ[[\^\[[[YXY[\ZUWUWTWYchifhfihhhihhhhgccccbabb`_`^_\_`_a``_`_```_^_`_\^\]_^\[YZ]^^]__^`^`]\_]^]_`^`_^^]^\]^]_\]_[]]][\\^^^^^^][\]]]_]_^_^^Z`]Z\]ZZZ]^\\]]^\\]^^[_\]\^]]]]]^\[ZWY\\]]]]^_]]^_____]]]^^^^__^^^[_]]XVX]Y`]X]^]\YXYX[YZ\\\[\\`^^Y\^_^`^^\\Z]]^[Y[XY[[ZZ]^\SUTTTTVWQPRQOONSVQPRSUTWTQNNLNOMOPPPQQYkne^WRRX\YUWSUTSTUQPQQQSPONPPQSPPRQQSRWTQOMMOQSRQRRQQSTWVYWZUXVUZVTSTWWSRPRTPQRQSRQTRRRPQQTRRUVZXWUTTSSSTTUVYVYYVTTQTPVPRSSSYeaWUW`s´«rWYRUa|xof]ao]ZV`[\RVW]jvnqpbaWTSUXWSTPRRRQPQSX`c[UUUSRTQTRUUSXRXZ^]_\\YY[[YXXWVWVWTTVVUbjghghighhkjiihfdcccbba^`^a\`^b^^bb_``a_____^`^___^\[ZZZ\^^^___]a^_^`\^^^^^^^]]]]^^^]_]]\^\[]]]\_][^^^_[\_]]]^^]]^]^^]^\_[[]]Z]\]^\\]]]^][]]]\^_^^]^_]\\\\[[[\\\]]]]^^`^^__^]]\]^^^^^^[^^_XTWY[]\ZX]_\YZY[[]\\]^^_^`_^[ZY[^`^^\YX__^][\ZWXZZX[^^WVVRQQSTPPONNMNRTSPQWXTWSQNLMMNPKPQMQTb~qb[ZXWTSUPQPPRRPQQROPPMPOOOOPPPQSRRUQOONQQOVQRRSOQRTWY`gcWTTR[USRRTWRQRRQQQRRRPRRQTRRRQQRSTV\ZUUSSSQRSSWZYVTUVSRSTRSPTVYYae^VV\h|©Ô±qfZTXa}xaW`_s{`[Vd\WSX\bs~svpeh[USUWURSPRRQQSSQYc]VWWSSTTRSTSSSVTVY^]\]][ZZWWWVTRTXYWSTTT[fjhhgkjkjmijihdedaaba`a`]`^_`^``_a^`_a^___`]__^_^]\\]^]`^]^]`]^_]\_\^^]^`_^__^]`^^`_]]^\^[]]\\^]^][__^[]__^^]^^]^]]]\^\^\\`[_[[]]\[[\\_\Z\_]\^^_^_^^]\[WY[]]]]]]^^^^^_^^__^]]\]^]^^^^\^^^XTWY[[\ZXY_^XYZ[[Z\[]_____`^]ZZZ]a_^]YW^_^^\^]]WZ\ZY[]^UQQPQQSRPROONQRTSRRUYTUUQQQOPMJONNPRUhzlk_TVURPQPNPNPQPQRRONPMQROOPPPQOOSRONNOQPSSPQSRSQTSZbtgQSTSYWSURQUPRSSPOQRQQPPQQSRPSQQPSUTUWSURSRQTTUZa^XXWUSSTSRTUW[caaYUW^hp®Í¤|p]TU_zs[TVUcshTWh^ST[ag}xsplp`VSUVTRSPRSRSUUTZa[VVSURSTRTUVWVUWYY_^]^\\ZVXTVTTRSTXXYVTTX_imkgiijjliifggcba`cb^aa_a`__^a^^]_^__a^a_c\^a^]]\__^^__^`]__\]_]]^a]_]]^`[a]___]]^]]]^\\^^]\_]a]^[^^_^]]\^^__^^]\]^\^^]]\]\[_]]\\]]]\`^\]\^^^^^^]]]^\^]]]^\\]^^___^^_^^`_^]^\]]]^^^^\^^^XUWY[[[YXY^]ZWZZX[\[^_^]_aa^]\[]\^a^^\W]^`^^`\_Z\Z[[Y[]TSPTTUTRTRQNOTUUTRQQWXWUSVQOSOLMOMRPVb{«¬riXRRPONOPPOOPOPTPQPPNPNQSOOOQPPRRONNOMKORPPQRPORR]ml]TRUXXVUSURSRSTSPQQSQRSSSQPRQRRPQQUSRTQRQSQTSTSXbc_WTRRVXSRWZ[ZfaVTX`yzty]UVj}s^TTVWosV_iZTSYbm}ppswdWSUUSQRQRSSUWXW\_YUVSURSRRTTSSVVWY\`Z]`]ZXYWVSSTQRTSVY[XZ]bfkkiikkmlhighedbb`ab``a^_a_^^___^^]^^_^a__]`[]]]_^]_^]_^^^^_]]^_]^__^_]]^]^\`^\]_\Z]]^^\\^]]^\^]\]]^`[][]_^__]_^]^^\^_^^]\Z_\]^\^\^_]^_]]]]^^^__^\]]]^]^_^[\[]^^^^___^^a_^]^\]\\^^^^]]^]XUWY[[ZXYY]\YWZZX[\]_`]``_`^^]Z[^^__^\YY]`^]`^a[ZW\Z\YWTSQSTTTTPRPONTSVUTRORWYVUUROQPNQPRTQUYdw}u]RNNQNOPQOOPOPQPNROOPNRORPNPQQQQNOOMMOPNOPRPPQTTkhYSTWVZWUSTSRRSTRSRPUTUTSSRQTVQRRQRUWWRSSQRRRSQRUab]SSUUZXSTXZ\\dZQUZuyZUXr|w|{sbQUS[mx\keYSTUS\yx{iXSUUSQRQRTUWYZ[]]XTVTUSSSSTTSTVVXZ__[]`_[\XWUTSSRTSUSTY^`acfhhgikjnlikhfbe`cab`ab_]`a_^__``_]^^\^__a__\[[_^]_]`^^_^_^_^]^^[_`_^^^a^]]^_`[_^^\]^^\\\\]]]]^^\]]_^\_]_\^__\^^^^^^Z]^]\Z\^^\^_\\[^]\]\_\^]_^^^^^]]^_^]]\[\[\]\[^]]`^^__^]^_\]\\^^^^]]^]YVWY[[ZXZZ\\XXZZX[\]^^]__^_][[\[]^]_^]ZX[]^^\_^^[VY[Y\TTSRRTTUSQRPONNNURROQPRVQQQQPRRNOQQSRVZ]ejny}~vdYSOQMSPQQPOQRPPTPPOQOPNPPNPQPRNPPNPSTSPMOQRTST`faXbZU^h[UQRRSRRSSQRSVTRSTSTTXSRTRSYb^TSSQSRUSQST^_YSTVY[ZUWYaa[YVSWhiSTTsywzvo`SVWcmpileTSUTVmx|twoYTSSTRQRRSUXY[]^_[UTVUUTTSTTTTUWWX\`_\^a_^]WXVTVZ[[]YXSVacccdfhhhillkjjjhccadba`_b_`ca]^`_^`]__]\\\\^Z[^]___`]_^^`^_a^]]^_]]]\^^_^_[^]^^^^]`\[`\\\^]\]^\]]^^]]__\\^^^]_^]]^[]_]]_Z\[Z[[]^^^\\[]\[_^]]]]`^`^_]\]^^]]]ZXYY[\[][\]\c\^`\^_[Z[]^]\_^^]_]YVWY[[YY[Z[[XXZZY[\]]]]__^_]Z[\[]^^_`^]YY\\]^[__]WWXYYTTSSQTUURRSQPONPVVVRRRSQRQQOORSPQRRRQTV\egcb`id[ZSPQPRPQRPPOPRRQQPNRPOOQONRPRPQRQORSUTQOPRVWW_u{akjm^V]`ZTSSRRUSTRSRRSVUUSQSTURSQQTYbc[SQQRSTURSQX\\VTUYWYT[^b]VUVUZu¡¬~wq_UUXkuxvo^UT[hffrhb\VWVkwyrpc^XVWVSSURRRRSU[^`baZRTVVUUTTTUTTVWWY_a_]`ba`]YZXW]ceefec`_cefeffhfghilkjihgdbcdbaa`a^``a`^^^^_]```^\YWXX\^_a^_]_\^]`^_^[^^^__^^^^^^^__\]^_]]^]`]\]]]\_\^\]]_]^\]]_^^_^_]]^]^\]]\`^\^\Z^\\^]]]]]\^]]^_^____^`^]^^]\]_][[YVWZ][\]][^_`^a]^aYY]]\]]]^\Z[\ZWWZ[\YZ\ZZZXYZZY[\]]\]_^^_\Z\\[]^^__^]YYYZ[_\\]\YVXW]RTTTPUWTQSSQQOPRXZ[VSSSPQPPOPQOOPQPQQPQUWXXYUYYVRSQPORSQMPOMSQPOQPPOOPOOQQQPTRTTTSQVSTRRRSYXWfvtjjmjp`UVZWUTTUTXUTSRRRUXVUSTSSVUVTSVVXc\VTTRRTVUSRV[YVSVY^[\_Y[USRTV]q³¥vrdZSVPY^y{zul_WU^d[`tofe\\moa\aVSVUTSSSSRRSRRQW]\^e]TTVWVVUUUUTUWXX\`c_^adbb][\[Z`cffggeeegebbgfeeghmkmkkkfacccbba``^`^`]^^]`_^a]^^\XXXY\\\]^`a`]]\a^_`]^_[^^_]]_^__\\_^^^\_^^]^_]\]^^]\\^_\[^^^]_[][]_][]_]\^\\_[\[Z[_\]]]]]]^]]^^]^^\__]^^^]]_\[^]\^^XVWZ]\Z\][]^_]_^^_[XW]X\\\]YVXZYWWZZ\ZZ][ZZXZZZY[\\\\]_^^^\Z]\\^^^__^]ZZZZ[^[[][ZWYWXNQPTTSVTQUTRRPRTZ^`YTTRPPPPPQPOOPPOPRQOQQRRRRTVVSQPQQOQQOOONOQPPPQQOPPRQORRPQRTRTTRXTQRQPUVZY\^\akf\]\UT[YTWVVSTWUUSSSUWRSUUSVWWZ_b_]WVTT[WVSSSVVSUTUXXY[gh^YVWRQRUVX]h®«[\UUUSUU^|u|ricUS_aX\qus{qodWXX[WZ^eaY[WSRSSSVXYXbcSUUUTVVUWVUVXYY`bd__ceeb^]_^]cdggiiggggfbbfecbegfjklmlfdccaba^_^_`_^\_\^__\^_^__^]^]^__^]^_^^`^`__`_`\]]Z]]^^___^\\]\]]^^]_]^^\_]]]]]_[\\\`]^]^^^]^]]__]]^^\\WXZX]^_\^]^\^]__]]\]^]]]_^_^]]_]\^]^_]YWXZ[\\\]]^__^__^`ZY[WX\]]^ZWWWXXXZ[\[\]`[YYZXZZ\\\\\]_]^^[[]\\^^___^][[[[[][[][ZXZXYNOOMOPRVVVTRRSUW\ce]UURPOPPQQOOOPPOPQPPQQQQSUSQRRQQRPNQPNORQOOQSQPQUVVQOOQQQTSSRSTQSTSTQQRTTUUTTV[ZV[ZSTZXVUWTTUTUSTUTSSRUTUTUU`jigfhhdZ^e^[RTRRRUXXVZ[aihfb[TVTQTVWWXmfZ\WVVTRUf~{uhc^TR\cXXkvuzy~oZclhl`^g|sgj][YZXZVVVV^dYTVUTWTVYUTXWZ[`if_`eghc^_aa`ceiikkiiiggccfdbbdfehjjkjdfeeab__a_^_`____^___]b[_^__]Z^___]]_``____``[^_]^]_^_`]``^^\\^^]]]\[\]^]]\]]^^^^]_]^\^\]^\]]]^]]^[^_\[ZYXZ^^\^_[][^^]\]^\\^]]^]\_^\^^^]]\\XZWWWZ\\[[\]]^`__^``\ZVXX]^]]]XXWVVUXY[\\][YXY[[XZ]\]\\^_]^^Z\^\\^^__^^]\\\\\\Z[][ZZ[Z[OMLMMRTWWVSRUXWWUV\XSTSPOPPRPOOOPPOPPPQRQQPRSRPRRQQRPPPQRRTQQQPRPNQRTSTSQPQPQUUTSRSURRSSPRTPUQTTSSUZ^ZUVXXVUUUTVUVUSXWVURUTVTTUV]`bbfpna`d^YRSSRRW\a\[fof_[[WUVVSVVSW\s¥rZW[ZUTTUVm}ypa^YXVYhYWes~~n~idsvuwdgftvmm]YXY[\XY[ZZb_TUUTVX[ZWWWY[^`je_beefc_addddgjjmmkjihhdcecbbdedgiiiideddb`_^``__`__`^^`_`\_^]^_`[_`Z^_____`]]^^^__^_]^]^]]_]^^`^\]^]]\^_^]]]]]_]Z^]]\]^^]]\]]^[_]^^]\]]\]][XVX\]^][^Z]\[^\\\_]]^_^_\[__^^]]^^[]UWTWX]\[YZ]^\]]]^^`_[YZYY][]``Z\[XVXYX[^]]]YXZ[\Y]]\\Z[]]_^\[^_]]___^^^]]]\\\[ZZ]\[\\\\NMLMNRUZVTXSSXWV]d_UQQPPPSTRQOOPQPOQPORSQQOQRRPRRQQSPPPRSTUQQORPQNTQNRRVURRRPRSRRRRRSTRSPRVRSSRRQRRX[YVVWYTSVVUVUUTTWWTXXURUVWWRWWX[_gf`ZYYVSTUVWY]^^ej__\UZWWSVUTSWZbÆiYVX^YSSSVvywn`\WXXZgZUhlr~ovv`iu}inmtwscde]X[YZ^nnpk_ZZ]cihc_XWXZ`bkjfbfda]adceeglllopnkihiedebbcdedfhhhhddcca_^^__^^_a^^_]^_^]__]^_^_^^^`^^_]]]]^^^^^^^\\]]]^]^]^]\^\_\]`__^]^]\\]]][\]\_[^]]]]^___^]][]\_^\]]XWY[\[\\\[[\]]^[\[^\^]_^\^]^__^\]^^^]YWWVX]\\Z]\]`^^_]\^\YVYZZ^\[]_[^]\XVX[\[^]^XWYY[\[ZZYZ\\^`\\]]^a\^a_^^_^^^]\\ZYZ]]]^]]^LMLKOOXa]^gjZVVavw\TQPPPPOPRQPRRQRRQPOSTQQOOPRORRQRUQQQSUUUQQPRPONSRQPPRUUTRSRRPQQRRRSTSQPQQQSRQRSQUUVWVSSQRSUTTWUSTUUUXUUTUWVTTVWV]Y\`ef]\XWYVSW\[[go`X\[V^VSUTTSUVUy`UUYa[STSSw|vl_ZXWV[beWlyw{~x¥ihy~wztvtwpxw|odbdlvlhehhlopj\\\^aisoi_`^[`edfdfjnmmnlkkhijfeebbcddceggfgdcbb`_^^__^^_`]]_]^]]__^]^a]^__`^]^___`^_^^]\]^[\]]][^]\^_\_]^]]]_][^]\\\\]\]^^\\\^^Z^^^_\]\\]]\^\]\^\YXY]\\]]][\]]^^][\_\]]]`]_]^_^]^^^\\[[YVVXZZZZZ[[\\^\[[ZXWWWXZ^]Z_^^^][WXWZZ\]^]YWYY\_^YWX[\\^`]]^\]]\^^``^^\\^^_]YYZ^__`^__KLLMXeit|~\]rt\UQSQONRTTSSTSTSRPOMORNOOOORORSQTWQQRTVVVQRQRQONRQQPORUYUTQRQPPQSTTSSSTTRSSSRRSQPQQX_ZRSSSQRRQTTVWXYXXZY[XVVVWXW\dX\Xce`]XZYUST`ba`ef[WUX_VTQSVUUW^aV\clgXSTSVhggko}taYWVXY]lis{¡viyx{{tpicgpuwjjdgifxwrrnkimif_\][^szja_Y]jicfgjkmnkihfhgehgffdcdddcdfeefdbaa`_^^__]^__\]_^^^]^^]]^^^]_^]^__`]`^_^^\^^`^]^^^]^_^]^^\]^\][\\_]]\Z\[\\]]^^^\]_\\^]]]\]\\]]\][_^\\Y[]]]]^\\\[]^_`[\_^]^]__]^`]]]]_^`\]^]ZUX[[^ZYX\[Z_]][[XXXWWY[\]]][\\\Z]XZXW]]\ZYYW\\\]]ZY[\\^^_\_\^]`^]`__^\]\\^_\YZ[\^b`aaKLLM]t| ¦©tq eYTTQSQRSVTUURPQSQNOOPPPPPRPRQNPVYRRSUXWVQSRRQPNQQQQORUVSRPQPOOSTRTTRRVVSRRSUVTUVSU\e[VSTRRSTQPNV\\Z]jryweXXXYXYZ[]_^ba_\XV\ZRVc_WU_lfYTX[XTSSYXWWbslVVcpmfUSUSTXYVX\hzweYWVWWYfuxlU^bky¥mw|p{zqjc^cffb][YZZp}vzffji]XY^ZX[y¦µ©phdnlgijnlmnkmgfeedghggeeefd`_bddedbaa`_^^__]^_^\\___]]^]]]^^^]^]\]]^_`^]`]^\^\_[^]]^\]\]^^_]]_]\[]^[_[]\]\\^^\`\][\^^]]\]_[\\^]\Z]]^]\\[Z_^\[^^^]Z]^]]]_^\]_\^``]_^]]]]^_\\]][VX[]\[XXXY[^^^^[YWYYUZ\[]^]]]]]\]_\XU]\[YVZW[\X\\\ZZ[^^__^_^^]`^`]_`^_\^^]_\\YZ[^aa_]LLMMXn| ©bTTSQTPRQUPTTTRPPQONNRQPRQONPPOORUQRSUZXWRTSSRPNPPQQORSTRQPQPOPSUTTTRQSWXTSSTTSVUUTW\WRSNRQSTOPWik^Wg¢zohc\XVW_][]dba]W[]T]\WUUX`c[TSTVVTUWWUXeffWUYbdbZVURSTUUTVTcmXYXXWW[hqfYXX_{|pyvku|urkfbcfb_^_d`[cvlddeig`Z[Z[hy±»¶Ê¿}_hjjjkkmmnmngfcccdeddeedba_^`bbbbba`__^^__]^_][\_`_]]]\\]^^^]^]\]]^^_]]_^^\__]_\[]`\_]^_^^]Z\]\]]]_^[]^]^[^\]^[^]_^\^^\\^]]]]^^]\^]\\\Y\^^[\]]\Z\^\[[\]]^]^\^^`]_\]]\^[\\[_]\XW\\Y[ZWWWW\`\\ZXX[XXX\]^\_]]\]^^\ZXWZYYZXXXY]Y[\[[YY\\^^^^_^\_`a]_^^`^_`\\]\ZXZ^``aaSSNMTantvw²¬¡¬£iSSSQQOPPROPRRPPOPPNNORQQQNOOPOPPPNSPRVTUQMNTSPOPPQROPQRPPPPOPQTVVUTSQSVWTSSTUVSQQPQTSTSQOPQQSRWkxbXaq¤¸µ« xbYallfc`\_a[WY[bVVTVX^ZWRSVUTTUVWVX\\YTU]iheZUTTSSUWWUW_yqd^^[WVXdibZY]|yjzydozvtokogihcYX]cedhqykmnhid_frª««­ÂØÑßÒ[hmdbffjlklmffccdccbcbeaa_^_^`ab_aa^^`^\Z[_b_][\`a^\]][\]^^^]^]\\]^^_]]_^^\^_]^\]^`a]^[_^]Z][^^]]_]^[\][\`^[^]]^^^]^^_]\[[[]]]]\Z[^^][]`[^[_\[[\^^\[[\]]_^^___\^_^[^^\Z]]]_]]XY[][Z\XZZY[\[YXWW[ZVYZ]^^__\\^^\XYXZ[WWXYYWXXWV[[YY\[\]\]\^^_a`__^\`]]_a]\\[ZWY__ca`bXRPT[]htl®±~hRTTQPRQNOQOPSPNQPUPPNQQOQPORROPOQQNRPQRRPOMQRPPPOOPPPPPOOPPPQRUWXVUSQSUVTSTTTTRPPPPQSQQSQPRTUS_pg]cu¥·¶µ©£v`Yempusm_Y[VWZ\\YVSTYWVTSTSUWWUUUVUX[XTU`gkdZURVSUTUWVfp~vrj`]Z\jri]]wupzuaX_jor{xj^ZW\[^XWY[_eirnmgfedqª®Ç¯Çýùÿÿ³rh[VX]^cikijfcdedbcabaf`c`___a`aba```a^Y[Y]ee]^][\]\]][\^^^^]^]\\^^^_]^^^^\^_]]]]^_`\][\^]][\]\]]]_][\]^`]]_\\^^\^Z_]^\\\Z\^\]^[Z]]__[__^][`X]^\^]Z\Z\]^]\]_^^^]_^]_\\`\_\__^]VZ[[[\\\[]]\[YXWVXZWXX[[^`\\]]\XWXZZ]]ZZYZZVVZYZ\\YZ\[]\\\^^_]`_^_^]_^]a]\^][WX^^a_abWRRRXW[cel{uveTVUTRNOOOQMSTROQRUPNNPPORRRTRPPOPPPQOPSTPOPNQPPPOPOOPPOOOPQPRTVX[WUSQSTUTTTTSSQPOPPPRQQRQRSTVWaucjw}¥r]W^fmkle[VUVWVWXYVRUTWVSQSRTVTSTTTTWZWUX]`b^XVSWPSRSTXm|r`mu_cynp{ufXZeeev~[SRV^m`_`UVY^honjgbdw¥µÔ·ÞþÝcWVW\bggfhdefecddcabb_d_`^^aa```bbb``__]\`ii__\[\]^^^^^^^^^^]\]_^^_]^^^^]]_]\]\^^_\\\]^]][\\[[]^]\]]]^^^_]]^_^\]]]]]]\[Y]][\]ZY[]^^_`^]^^]X]^Z]][\\\]_^]]^\]]\]]]_]]`^_]]]]ZXYZ\X]\\\ZZ[\\XVVVWVWY[\]_\YYYZXX[X[]`[WXXYVWVWX[^[[\Z\Z^^^`^^^`^___^\]^]]]\]ZZ[]`_a_SRPPVTSUX\^b]abcdXQUVTRRQPONQSQSQNQPPQOONPOQQRPOPPPQRSQSSTQPOPOPOQNNOOOOPPOPRQRSSUVVTSQSTUTSSSRRPOOPQPRRRRRSUW[^m}||hr|ptpi£lc[UWWWWWVSVUTVVYVSSSRVSTTTUPQRVTSUZZUTVVTSWWURTTQTUTVcnoylrxgZf}c^pkcZXa^_rbRQVcnefd^^\_ijgdeijhebbjfbx°¹©´Ê¢{vrqifhhifdhhed`fcaababa^`_a__aa__`aaaaa^\^i_^_\[_Z_^_^^]^]\]]^`^^_]_^^^]]_]]\]^^_\[]]^]][\\[[]^]\]]]\\\\^]]^_\]\\^]][ZY][]\[Y]\`]]^]]^]ZY[\^\`[\\_]`[]\^^]_]]`^\]\\]]^]]\ZZUW[ZY[]]ZWY\]\YWXWWVTWZZ\[^YXYYXZ[V^]^]Z\YWUUXZ[^`^][Y\^\^]^`^^]^_b_^\]\]^]^\\\Z^`__]UUTTVRSSSUUXWXVSXTPRSSSTRPNNRSQSPNOOQPOONQMNQRQOPRPRSSRSRSQPPPOPORNSROOPNNQQRSTSRVUTTRSRTUTRSRRQPOOPPPRRRRSUW[`fzzwrcitnjmga]q\TSRTTSTSTSQTTWWSSRSSSTTSRSPSTQSUWUTUTTSTTTUTTVUVUSSVZ^`ep£umwo]a|c_cga\XVbeokVYXbikof^d\Zbpna\`^\lfWZX\t·Ä®¤ÁÆqgfeigefgfffedccb^caaa`^a_aa`\____````__^a`_]][_]_]]_]]]^^_a___]]_^_^]_]\[^^]^\\]^^]][\[[[]^]\]]]\\\\]]\\[]][\]]]\WYa]^_Z`Z__[\^^\\ZYZ\]]\[[\__^\\^\_[_[\^_^]]]\]^]]_^\XWW\][^Z[YX\]\[^YYXWWX[][[\\XXVZW[[Y]]^]\\XVVVWX\_a_^\[X\\\]\\^[]^^aa_]^]^]]^]]^[X]^^VWXSQSRPRQRRSXYRTTQPRRVPSQPNNSSRRPOPQQQQPPPNMMSRONQRQSSRSSQQTSQONRQSQQQPNQOSTQSTUSSUTTSRNQSUTSTSURPQQPPRSSTUVY_emwslh^aiaeg`]ZuyhXQOSQTQRRPQQQPUXUUVUTRQSSTRRSRRTQRRSSQSTRTSUUVWVTSTSUVWWYcrn}lt}xzzh^eokd^Z`fj~l^[`d[df_^YX[_mk[^`T_¸fivr¿Æ³®V\bmihdeiheddfeffdedb_c___`^``_``\`_``````__`_]_]]`^\]]^]__]]]a__`_^]^^^_\Z\\[_^]^\\]^^]][[[[\^^]]]\]\\\\]]\\[\\[\\\]\XY^]\_^^^^[\\]_]\Z[[\\]_\[]^_^]^^^]\^[\_^_]^^Y\_^`^^\VWZ\\\^ZZ[Y]]Z[]]YZWXWY][[^\XXWYXXZ\U\\]\\ZYWVWX[^^`^^\XX[\]^_]_\_^a^_]`\^][\\^_]Y]^]TVSRQRQQQSRNRUWSSSSPRPTTQRONNRQOQQQRPRRRPONNNNSRQPQPQSPSSSRSURQOOPPNSPONQPUPQQTQQUQSWVTQPQRTVSVVUQORPOQRSTVWW[ckunha^YY^\``ZZXjquo^WQPRQSQPONSPQOUZXVWVUUUVTTSQRRRRTTRQQSRQRTTTUTUSSTTTUUUTVWYx}{gahjd_fgaadiqinh`XW[k`qeb`faegmjWc|j_iv}wtnce`[WVZggdhgigecdedcddcaa`_^``a__```_````_b^^_`]^__`^_^]]\_`_]\^^`_\]`^^^]]]\]^\[^^]][\^^^^]\[[[\^^]]\\]\\\\]]\\[\[\\\\][XY]\[\\Z]\Z][\_\^\]\]^^^]\]^]\\^^^^\^[\`^^]^[[]^^`\]ZVW\]\][Z\Z\[]\Z``Z\]WWVZZZ[YXYZWXZ\\^Z]Z[]]\XWYXW\^^]]]YXX\[\\\]]`^_a^^a\_^^]^_]\ZZ]^XZTRPOPOOPSRPSVRUWXRPSSUTNQNNQRQWURSQQSOOPNMMPQQQSOQQRQRSSQQQPPPOOOPONONOROQOQPQSPSRVVUSSTRSUUUUTPPTNQRVUTWWW\cgd^]WUTQSW[ZVVU_dieUVRQRQSQPONQPPRU\Y`\VXVVTSTTTRQRTPRQRRSRRQUWTRUTSTUTSVYXWVSUa{nx|nbge`_^[W[fkormg^_agqfqjmstmkonlZ\qk^llYXY]Z[\`^[]__]a^^_dhdhffdddgbcaa```]_a_``__a__`__b`b_``__^`___]\\]^_]__`_`^^_^^__]\]]]\^^]\]]^]]^[]]\\\\\]__]\\]]\\\\\]]\[\[\\\\][YZ]\[\[Z]\]^][][YY^^^^]`]\^_]]^]\]^^]\]^^^_]^[^^^^^^YVXZ]\YX[[Z]ZZX^_^]\\ZVWVZZZ[ZY[XX\\\\[Y[[^^`YV[XV[\^][]YXXZZ\\^_^_^]]b_`\_a]^[_^^\Y]_\_TSRQOQOSTSQSSTTUVRPRQSQQQMORSTUTQRTRPROPOMNOQQQQNQQOSRSQOOSMNQQPNMONOORRQROPPQRXUUTTRTRSQSUUUTSQSSOQRSVTVSX\^\YVUSUTTVRVTSSSTX\[TUSRRQRQPOOPPPRTYW[ZUXVUQSVRSTRUSQQRTQSRRSUUTRSUTUTTSUWWVUUWWe|{cblpeddbZ^ZWWccz~mlb\c`][aoswyxxqqa\dqhedYTTVYVUWXX\ffzq__cjieedebddb``]``_b`a`__^__^^a^b_]`_^b`__`_]^_^]^^]]^^]`]]_^_^_^_\`^`^]^^]^^^^]\\\]\\\\]\]^]\\^^]]\\\]^\[\\]\\\][ZZ][[\ZZ]\]^\Z\ZYY[]_[_]^]^^^]_][]^]^]]^]]]\\]\^^^]_WXUY\Z\]][[\[\Z[\\^Z[XXWVZ\\\YZ]YY\\^\ZZ[Z]_\YV[WX\]`\\ZYXX[YY[[]]^[\___`]]]`\^`]^\W[]bYQSRPPNPRUXUWUTUSQOQQOSRPOPPNQPURPPQSPOOPONOOQQPPOPPSPRQRPPQNPPQPPPPPOPQRONPPQTSURSSRPPRRSSSTUUUQQQQSTXTTURTXWVTTRSSUWUUWVTSQQSPRSTTSRQRQPOOPPPRSWUWXUXVUQSURSRRSSRRQSSSSPRUUTWRTXXVTTUTUVVTVU_pzzrh][qbY\if^daY^\WW]`ggcea[^a^[a{mqj^hjjih[TUVWWWVVVZgorssmmlniecabc`bba_^aa_a`aa`_^_^]_a_]_`_^]^\^^\]]^_]^]]^_`^^_^]]^^_`]a]__\]\]^_]^]]]]]]ZY\\]_[\^\\^\^]_^[\^_]\\\]\[\][Z[\[[\YZ]]]^\Z[ZYZ[]^\^]]]^]__\^]]]]_\]`^^^Z_\]_^^]]YTVZ[Z\\\Z[[]\Z]]]]YVXWUWZ\[^\[]^[][[\\\Z[^^[ZYZWYY^_]]][XXYZ\[\]^^[]^^__^^`_^\_\^[ZYZVSSRQQQQQQSWTUSUUQPQPOPSRQQOMOQPTQQPSWTQSPONNONOPPOMNOOROQOPPOQPPRRQNPPPPPPNPQQSTSPRROQRRPVTRRTRQPRUTUUWVSRPPTTQTSRPSSUSWUUUSRSSQSTRPRQRRRPOPPPPQRTSUVUXVUQTTRSRRRRQQPRTQQSUVUWZTVVWVUSUVTTTSVUek_\ZUU[kjWVah^^^X_`XTW_fg`ZXZZYYY^m~`fl[[]_a_WUUVWVZZVVbpposwqqmmhhaaaab_b`_`aa_``a`^_a_^]^^_`^``^__]`]][]_^`\\\[^pj_]]]]\\_]^]]][]^]]^]]]_^]^]\\\\\]^\]^\]]_Z]^^]]_\\^]\^][\][[[\[[\XZ]]^^[ZZZZZ\]]]^]]]^]^^\^^_^_]Z]___][\\]_^\]]WUY[Y]]Z]]_\^^\^^]]YVXVWVW[^[^]]``]_^^^\[]]^\\ZWY][^^^\^][VXZ_\\\^Z[^^^__^^^_]]^]\\\YYQRRRVXQPQPNSRRUUWTRRPSNRTRQPONPQQQOOOQPTTRQQOQOLNQRPOPPOPROPNQQQSUTRORPMQQQQPOPQRRQQPPRRRRSTSSSQQTTYWTVUSQQQPSTOSPQRRQQRTTPSQQRUTUURQQQQRQSPPQPPPRRRSTUXVUQSSRSSSRRQQPRSPQSTUVXWXXWRTRRSSSSUTTW]a]YVUXXjmXU[kncXW]a]TT[Z^\VUZZ[YYZZqsjdYaiiUUWWTRWVVVW\ZWWdqrsxwmmmmhihf`ad`cbc^aa`ba__\`]_^^]_^_`_`_`^]][^\]^]\]^[Y]sxtfa___]^]^[\\]\^^\]_]^]]^]^^\]]\\\]^\]^]`^\^_][_Z^^[^^\[]]\\\\[[\WZ]]^^[ZZZZ[\]]]^]]]^]^^]^^_]^]Z\^]][[\\]^^^]\YUZ]\\[][]^]_\]]^^][WWVVWX]^^\\[\]`^[^_]\^^]^[XWZ\ZZ[]^]][[ZY\]\[Z[\_^_^^_]`^]^_^\\[[YQSSUUTSSQPOPRSSTWVSONTRSUSQPNNPQQPOPPPOQSSTOQQONPSSQQQPOQQONOQQPQTRQOPOQQPRRQOPQQQRQOPPPRRQTUSRRQUSVWUUTQQRRQQQPQQQPQSSRQRRRQPQTQUTUTOQRRVTPQQOPOOPQQRUXVURRRRSSSRQQQPRRPQSTUVXXXVVRSRRRUUSTUVVW\`[USWXbm^U]pvj^V^e_WXZXWWUUZZ\fj^XZ\XXWWYZalYTVSSVXWYTZ\_]Z^mvx{wpnomghegb`daeadbaaaab_`^^`^^``_`^````^]\[]`^^`^]]^]^Z^bmnqe^]^^]]\]__^_][`[]Z^\]]]\[^]^[]^]^^^`a_]^_\_^`\]Z\\\]]]][[\\[ZW\^^_^[ZZZZ[\]\]]]]]^]^^]^^_]]]Z\^]\[[\\]]^^][XX\]\]\]\]\^]_]__^\[TUWUVW[`_]][[^_^[^^_^Z\^[\YWY]]YZ^_^]]``[[\]\[XZ^^^^`^]`]]_]]]]\ZXQRUTRRQPPPPPRRQTRRPOPPRSRRROOONPPOOPPNOPPQTVQPQNNPPRSPQRQQTROQPOPPUUQQPQRJQQSSQRPQRPOQQOUVRUUQQRRRRQTRTRPQQQQPQSSQPRRSTTSRRRSORQQQRSQNRTTRRRQPPQRNOQQTUYVWWSRRTTTRQQQPRQPQSSTVYYYTURRRRQTTRTUWSVV^`WUVWZopmjuyoh[_f]Z^_]a\[^Z^^j|g\XY[XW[]]_h`RTSTSWVTUWZdm`Zgx{zrprohdccb`dbb`d```^aa_ab__a`_`__b^b`_]]__]__^``^^]`_^^^_epi`^^\]\\]^^]^]\^\]^]^][[^\]\]^\]^]^\__\]\^]]\_^]\Z]_ZYZ[ZZ[Z[Y[^^]^]ZUWZ[\]]\\]]]]^]^^^^^_]]][\^]\[[\\]]^^][XXZ\\^[]\\\]`\^_`\^[VUUVVUZ`_]^\Z\`]\`]^[W\U\Z\WW]\\X\]^`__``^\\_[ZWZ^^_^]_`^_^^_`^]\ZTSTQRQRQPOPPNOOQPPQQORQQPRQONPNPPPPPONPPOMQVTQPNORTORPQRUTQRPQPOQQPRPQPQRQPOQSTRSTTSQRSSSTSUUQRRQRPPQRQSPPOPPPORTQQQSSRTSTQSNQPPOORRQORRTQRTVSQQPPQQRVVVVYYRRRVURQRQQPSPPQSSTWZZWRTSRQRQSTRTUURUT[\YWXWX]zwyypj_Y]ZZ[Z\a[\^[[\^jb[W]XVUWW]]f`TTTRTXYXZ\_kw^[`x}wrspicbdcaabcbd``a^b``a__```]___a___^]]]^[]`_a`^\^`]^a^`b`b\`\\]^\__]\]]\][]]^]\]_]_^]]_^][^^]_^^^\\]^]^\\^Z\_ZZYZZX]][Z]^]]]][XY\\[\^^^]]]]^^^^^^^_]]][\^]\[[\\]]_^][XY[\\][\\]^]]\^\^[^\YVWWVVXY[\][Y\_]]^]^\\YXY[ZWX^]XZ^\]_^]`b`\[\ZXYXY^^^`__]_[^^]\\][YTQRRWUTQOPQPPPOPQQRPPPQNPPQNQQPPMPPNNPNOOOTUQOMOOPMQONOPQOPRQQQSQPPQSRQOORQOOSVORRRQSPSTUVTSPPRTRPPRPSTPPOPPOOPRSTSRQRPPSPROPQQPPQSRPQVSPRSVURPPTTRQRRVYWVTRVVVRPSOPOQQOPSSTY[[UPSSQQRQRSRTUSRTSXYVVWVW[rv{~utmcYWXZ\WVZX[\XZZY[Z[WWVTTTTXabdWTTTVXXZ^_ajc\`gvysnpplg_`bc_bbaa_``_aaab``a_a\a_`b_^[Y]^^^[\___\^^]__aa``_`^]\]]]^\_]][\]Z\][^^\]]_\]^^\`\]^_]]_]]]]]]][\\\]\]\Z^YY[\_]\[`]\__][\\]^_]_\_]^]]]]^^_^__]]][\^\\[[\\]]_^][XZ\\\\[\\]]]]\^\^]]Y[VWWWYWVV]]]\\]\\\]_^\ZUXYVWZY]Z[^\]_\^^__][[[\]ZW[]__`^]_\__\[\]\^VTSV\ZRPQRRRPQPNOQPPNPQORPPSPNOPNOPNQOMOONOSROOONPQPOPNOSPNQNRNTPQQQQOOOPQRQORTMOQPPOPTVVURQOPRTSQQOOSSROQOQRPMQRPMQPPQOPTURQTRQRSRQQSURPUTRTVQTSTTQQRVZXUTTVUSQQRPQQQPQQRRSSWXSOSTQQRQRSRTSQRRRUVSUVVVYjnu{tmhb\ZX_aZWZ]\ZZZYYYYYYSUTTVU[e^e[USTVVYYY\`b`dkouxxyunlknia```^`_^^^`a`aa_c`b```]`__`^\VX[][][[^_]^___`^a^aa___^a]]][^]_\\[\\\\\\]]]]]^]]\]]]^^^^]`\^]^^]^]\\]]]\]\ZZ[]]\^\^`]`_]]^]\]^^^]]`][_Y[[_\^]^^]^^\\^\\[[\\]]`^][X[\\\\[\]]]]]\_\^]]Z[WWWWXWWVZ\^][[]^\]^]][YVWWVXWVWW[[__a^]__]\][[\\YY\^]^__]]^_ZY][^]WURT``UQRPRQRPQNOPMNQRQQRQQTSOPQMQPPPOOPNOPPQQPQPPPOOMQPOPQQPONPPPQOPPNPQPQRPOPRRPQNQRRTSSQROPRRQPQSRSQPPQOPQQMPOMOPPQQQOSUVSUTRRPPQPRQPRRRRTTQOQQTSRQTV[[VUWTQRPPQSRSRRRQSQRRURQTTPQPORSRTQPRQQRSRTUUUWbgoxsfcb_]Y__YVX[^\[[XVWXYWUVUWWZ^kcifVRVXYYWW[__`eiqw|~zqlijlg___`^```]_a``ba`a`a``^]^_]^^ZXYWX[\]]____`^]^`^]]^a_^^`^\^\]]]\][Z[]]_\\\\]\[\\]]\^\^\^]]^_^`]^^\]^\\\[[]]Z[]_]^]^^^^]`^[\^^`^][]^^]^]Z\^\^]`]\^]^Z]]\\\]\]]a_][X\\\\\[\]]]]]\_\^]][\YXWWWWXVZ\[[[]Z]Z]]^^\YWVVVWYYUWXYYZ_]``_]_\\[\]\YZ\\^`^^\^\^ZY\_YVSRXY\VOSPRQPQQPPQNU[SOPPRTTSPQPQPPMNRQQPONMPRRRPOONOPPNMOPQPOPPOPPOQQOQOOPRPQRRROOPQNQVTPRSSQPPOPPQSTPPRPOORPOPONQOMRMQRTTYVVTTSSRPQQRSQSQRSSQSRTRUQORTX^`ZXZUPQQQPSSQSUXVURSTSRTQPQQQSSSRSRRQPPPQTTTTUZ]iul`^bb`Z_^XUWZ`_d]VUVXXXZWXYW\bl`fsYWZ[Y[YXWY^_ksw||rniffjg_d_`_ab`]ab`_`]\_aa`^^`_^]\]]`\^]^^]]__^_`\]^_`^]^a_^]_]_^\][_`[]\]\^Z\Z]][_^\]^^_\\^]^_^\^^`\]][]]^^]Y\__]\]^^^^_]]]^^\]\]__^]\\\^_[YZ\_^]\`^]]]^Z[]Z]\[\]^`^][X]]\]\[\][]]]\`\^^]\\ZYWWWWYWZ\\[\]Z]ZZZ]][WVVVWY[[Z[YXWWZ]^_^\^`[^^[\[YY]_^_`]Y]^[ZZ]TTRSX_cXPRQQNOMPPNQQ`eVPPPRQTTSSQOPSQPPOROTNNPQTSSQQOPRNOPNOPQPPQPQQOTRNROOPPSPRQOPRQPRTWUPQUUQOQRQRSTRNPSQPPOOOOLQNOOPOPPUSVTUUWVSRQQQPQVVUTSSSRRUUUQQQRW[c`][UPQQQRSURQSZXWSQRQQTPURURTRRVVURQQPOQRQQSTSTcreYYbe_[]\WTVYcbm_UTVVVWXVWWWXUW_gpbZZZYY[VW\cbqyz{ytmfdddjidba`_bae]ba```___``__^_]\^]]]^^]_]_]``_a]^\^]\]_]]^`_^_]^]]^[_]]]Z^[ZZ][^\_^]Z^^\\^_^]^`^]`\_]]_^\_\_\[]]^\\]]]^^_]\^^\\\^]^^\\]]]_]^\Z]__^^_]]_]`Z\\[ZYZ\Y^_[][Y\]\\]\\^Z]^]\`\^_]]]\ZWWWW[XZ]\\]][][ZZ]\ZWVVVVX\]\\[ZYYYYX\\\]\]^`[Z\[ZX[[``_ZZ_][X]rcTTZgo^QQQQRNOLNQP\on\RQRSRRSRRPPRRPQOOQRPOOQOPNQSSRRSRQNOOPQRRROQQQPNQRQNOOPPPQORRTTUSTTPSSPSPRSTTQPPNPRSPOPOQPOOQONOQNORQSSVVTSRQQPQPQTTUVRRQRTTVSSQPTUbd[YZSRRRTTTSRPPUVURPPQQVQRSVSTSUWWRPPRROPRQSRRRR_mcSTbi^]\[VSUWfkwbSTUUUVVUWVVVZgqtugY[VYXXWX[ae}}xzvrligddijfbaccaaca_ba`b]`\`_]]]]]\^___]^]^^^`_^`_]]\]Z\\]^___^]^]]\^\\[\]][]]^[]]^\^\^^_^\_]^^]^__^]]_^^^]\]\][\]]\]\\]^_]]\\^]^]]^]\\\_[^\__^_\^_^_^\]]__^[[][[Z[Y^^_[\[Y\]\\]^]]\\^_]a]^`^]]][WVWY\YZ]]]^][][[[]\ZWVWVWX[\\\[Z]_^\ZZ[\]_^b^^]ZY[XZZ]]]\Z[]\Y[nTWah\WSPOPOMMNPR[j`VQSSQQUXSPRQQPPQOOPQRQQONOMQOWTSSWZVNNOPQPORSSQPPORUQPOPOQSNROSVVTRPPQRQPQRRRQPTRRQQQPROROPONOOOPQQTVQTUTTRSRQRQQQPTSSTSQRSSTVVUVSRXgqaZVTSSRQRTQPPQQRPPQPQQUUTQSUTTSTTPRSQRQRSRSSSSV\glRU`i_Z^ZUSTVitdRSUTTUUTVUUT`w{l^^WYXXVT[Zbx}ztklf`chgbdcac`aa_ab`b__^]][]]]]`^___a_]^^^]__``^_]Z^^\^^]^__\\]]\\]][\\\\[][`[_]^Z^_\\^^^^^^^]\^^\]_^^^^]^\\]]]\^^]\_][\\\]^_^]^]\]^]]^]][_^`^^_`]^^]\]__\][[\\\Z[\`^\_[W\][]\[^][\^]^][]_^_^_\XUWZ]ZZ]_^^]\]\[[\\ZWWWWXY[\\\[[]^^\ZYYV[[^]_\]]]XWX[Z\`][Y\]YZ¯{TU\bZUSPPPONNNPTXXTTQTQSSY\XQUTQQPPNOOLOQOOPNNRQRTTTTXQOPNPPRPPSRPOPPPTSQPQRPPPRTUQUUTQOQOPPPQPOQPRRTPRQOQOROQPRMRSQQPTXXXWSPQPQPRQPSQRTQSUTSUVTUTTY[T\hqkYXXZVSSORQRPTPPQPRQOQUVUTSVTTRRQQUSRQQQQSRSSQV[bdYW`dTV\\WUSUigQSUSSTSSVTTYerdbYYXXVW__ev|trjgdefddcb`bc`abbb`c````^\```]]^^^]^`]^^^^__`^\`]]\^]^^^^_^\_^][]_^]\\]\]]\\Z`]_[`\][^]]^[]^_^^^^]_^]]^^^\\]\]`[]^^\]^\_\\^^^[[]^^^^__\^]`^\]\__^]]^\`_]]]]\]]][Y]_^\^][Z][]]^^`\[^__][]_^^_`_YWX]_[[^a_^]\]\\\\\YWWXXYYZ\\][\]^^\[ZYW[Z\\[Z\^][Z\\Z^]\ZX\\WWÎ¢{TSV[XUTQQPOOOOQTVVSSRQOMQYZZSSURRPPNOOOOOOPPNMNPPPSSQUPORNQNPPQRPQRPPQQQQPQRSTTTYYRTUSQPPOOORQOQPORSRPRQOPPSSQMPRTRTSRTSUVVSQSRRQRRQQQQPSTTURTRRVWVUWY]fc\[ZacXTUTTUQQQQRQPQQPSUTUY[VQRSSPSSQSSRUQSRSRSTX]^ahgURVW][UUTYreUQSSRRSRSVSS_k¨oge[ZYXV[ceht}~wtkgdddbacdcbba`abbabb`aaZ^_``^]]^^]]^^[_______]^]]]]^`___]^^`[][^\\[[]]]\]]\]^\^^^_\_]_]]]]^]^^\]_]^_]\]\^^]]]]^\]]\^^]]]]\]^\]]]]^\\^]^]`^][]_^`]_^]`\\\_\\\[Z\\]]]\[\W[]]^]_\\]]]_`^^``]]^^`YVXZ_^]\^]^]]^]]]\\YWWXYYZZ\\]\]]]^\\[YY[Z[[ZZ\^\ZZ[ZYY[XWWYZWXÚ±pUQQUVXURRPOPOPSUUTRSQQONQWYWVPPROOMNOOOPPONNNNNNQONNQSOOQMOQMNPPQQRTQPPPQQRTVVVUXVQQTSPPQNROQQQPNPRSSSTRNQTVUUNPQPSSTSUSSRQSQPQSRQRSSTQPSRVRTQSRVYUTU_ecbca_cbVWYVVSUQORQRPPRQTVUTUVSQRPRQTRSSTTSRRPSOOSXZVS[c[STUW_ZWVVUTURSQQRRTSSSSVq§»¬mki]ZYXY_gjlsz||zvlgedecbcccbb`abbbba`ba^_^`__^`__]^^`_^__^^^\]_]\]]]\^]_`]_[][]]]^Z\]\]]\[\[\]]]_^\^^]^[^]^^\^]^]]\^]]]]]\[]]]^]_]^`^\]]]^[^^\]\\[^]\^^]]^]\^^^]`__]_^[\Z_]\\[Z[]\\]\[ZZ[\[^]^__]_]^`__`^]^^^^YWVX_[]^\^__]]^]]]\YWXYZZZY\\]\]]]^\\\ZZ[ZZ[YZ\^\ZZZYXXZWWWXYVXÕµz[UQSUUWSSQPQPRTUTRQRQQPOQUXVVPPROOMLOMPRNOMOQPOONNNOPTSPOOQNNQOQQORSTQPPRQNORSSSUTSSTSTPSONOSQRQPPPSRSUUQRSRRROQRQQUSTTURPPQRQPSQOQRSTVTRQQSSRTSVVVTT]g`fmkfd[SX[WQTRPPQSNRORRQQQPPQRQOPSTTSTTSPSQRRUSSUXWSQSZ`YSTTY]WWTTSTSRQRRUSSSVSU]±ªxom_[ZY\ckpoqw|~~xmheefeddccbb`abbb`_`____^`__^_^`___^^^]_^]]^_]^]]^]\\\^_`^]^]]]]^]\[[]\_]]]^^]\^_]]\]^\Z^]]_]_^`_]]\\_]\\^^^]]^]]^]_^[]^]\\_[\\\]]\^]_]^^^`^^]^`^`]\_[^\`]^Z\Y[[\[]\XVYY[Z]^_`_]_]]a^_]]`____ZVWZ^^]Y^^_a\^\_^\\XYZYY[[Y\]^]]]\^\]]\\[ZXZY[\^\ZZYXXWYWWWXYWX·­}f]TYSWVQUPSRRSVVSPPRQQQPQSWVVQQRPPNMONPQOOPPNQOPQOONNQSRQPQPNPQPOQPQQRPQPQSPRQQRRRRSUWUOQPNPQSPQOSRPQPUTRRRPPOQQQVUVSVTTQPQPPRROPQQORQTTQQPQRSUTXZZX\bcXcgne]WRVXWSRRPQQQQPRQPPONQPQRQQPQTSRTSRQSRUUTSRSYVUTTWah]UUUWYXTTSTTRTRTSVSSWSWZ±©prmb^aghpvspt|znhffgfedbcbbaabbba________``__^^_^`_`_^_^\\^\]^]\\\_]]^^_^]^^^^^]\\^[\\\\^Z]]^]]]^^\]^\[\]]_\`]][]_]]_\[]^^__\]]\]\]\[[[\\\Z\]]]]_^]]]]^`]^__^___`^^]]\^\a\\]Z[\^[]\YXWZ\\_````^^_^a]^````^^]ZVXZZ[XX`^^^Y]]^^\YVYYWY]\Z[]]\]]\_\^^]][ZWYY[\^[YZXWWWXWWWXYXYyZWQWTSTURQRRSSSPNQRRRRRRWVVRQRPPONPOPPPPQPNQOPPPPNPPPSTSTRQSRNPQSTTTSSQSTURPSRROPQQUUQONQPPRQQOTQOQPSQRRRQPOQQSTWVVYURQPQRRPQQPQQPRSRURTOPTSSTWZ[[^faW``]XRRRTVTTPPQQQPQSQQOQQRURRQQPSQRSRRQPQRQTVSTSSUWX[[TYei]WRS[[TRTSSSRQTSRTSUTUf±«rpoefghiovrruz|pigghhgebcbcbabcca___`____``__^^^^__^__^\]\a]_]][^]\^]]^]]^_]]^]`]\^]]Z_]\\^\^^^\]^]_^[]^_^]^_^_]\a\]^\Z^_]]\^][\^]]\Z\[\[[][^]`^^]Z]_^_^a]\^^__^_]\\\]]`]]^\]]Y`Z]ZZVX[]^`a`^]_^_]^``a`_^`]_ZXZYYYWW\\[][]\\]\VXXZWZZ\[Z[[\\\\^___^_\ZVYZ[\^[YZWWWVWVWWXYYZwq¡naVSRPUOTQQRRRPNPQQRPSQPVYWSRRQQPOQPPOQQRPOQPPPPPNOOPRTWXVSRRPRTSTVTSSRTURQPSTQQQPQTTRPOQQQRQPQRPQOPQRMPQPOPRVSPSVWXUSPPRRRRQQRRRQRTQUVUPTSSY\WZ[[]_\V[]YTRQPRQQQPPQPQRRRQPPQSTURUPQQTSQSSSTSUUTSSTSSSRVWVWVX^hkhYRWXURSRRTSRSSTQRSSTay¢yluumacijptwzz|}qhghijifbccccabcca`_``____``__^^^^^^^_^]]]Z][^[\_\]_]^]]]\]]\\]^]][\]^]_\]Z\]^\]]^]_^_]]]__]\\]]^]\\\\[]\^]^[]\]]^^\\[[\^]^]^]Z^]^^[^___]]`\^]_\^_][\]]^]\^`\\^\\\]]XYWZ^]^_``]]_^^`]_^_^_``^YZ\[WXXXWXZ\[\]^]\YYY[ZVYZ^ZY[][Y]]_a````_ZWXY\^[YZWVVUVVWWXYZZrl~p^XVTRRSTRQQQRQQROQQRRRSRSTTUTTRRQQRQPORRSPOQPPPOPOOOPRTUUVUTTTTVTRRSQRPRSSSQQSRPOPQTSQPRRQRRQQRQROOOQNQPOOQPQRTQQTXURQPPRRSQRRRQQOQNSWXTSSQTWWVYYX\]XTVYURRRQQOPQSUQSPTRQPPQSTRTSSRRRSTSRQQVX][YWWYXSRRRTSTUVYYhxbSTVWSTVTRSTSSSUTRTRUUmyxhwkd^fnlovvz}{{tgfedjhfedcddbcddb`_`a____```_^^^^^^__^]]]Z\[]]]^\\\[^^\^\_^]\_^]]]]]]\][\\[_[]]\_]]]^^\`_^\]^^^^^\\]]^^^^]\[^[\]]][[\[]__\Z\_\]^]]_`_^_^\^`^]___\]\\_\]]]__\][\[\Z_[UW\]]^a]^`_`_^_^]^_`___\VXZ\[[[XVUY[^[[^_[X[Z[ZWZZZ[[]^[^^`^_``__]\[WWXYYXVXWVUVVXWXY[[skur_VVVTRQQRQRPRRQQNQRSTSUURPQQQTURRPSQQPPTUQPQQQPOPPOOPRSSSVWVVVSUSRRSRQSSSRROOOTQPQSRRPQOPSSQPPQQQPPPRPORQQPMQMQPPRURQRORSQPQRPQRPPQPQRUUSUWSSQVZVV[^VRSSTSQPQROORTTRUPORQQPRPSUSSRQQPQTSSQSRY^\^]`a^YWVSTUWZZWWTX`ba[Z[WXcaXUSSTRSSSSTYkwpjmmpm`\eiorqwz~ugffeigeedcdcbcbcca_ab``__```_^^^^^^__^]]][\[]\]]\\\\^`\][_\\\__^^]][[[[[ZZ]^\]^__^]^_\\\\^\]^^]^^]]^^^]]^[]^\Y^^]\^[\]]^\[[]^_^^^^_^_\^]\aZ`^^``]^]\\\]^]^^__\]^^[[]VV^]]]b^`a_a`^]^^_``^][XWWZ_ZX\UXUXZ[[Z[[XX[\[ZZZX[Y[]\\]]Z\\^```]_]ZWXYVVWVWUXVVVXUY\\|pb{n\VUTSSQOQOPPPTOOQSTRSUSTQQQSTSPOPPNOOQTRRQPRPOPQOOPPQQPVYXXUSTSRSSRQSRRQPNNOSRTQRSTRNOMQSOOOPQQPPTUSSQPROOPNRNQQPQRPPRRRPNPSQRRQQOQRSTRWPQRSUZUTSXUPRRUXSPQQQRQRQPRPQSTTRSQSUVSQTQQTUTRSRVW[]caa^b`\XXYXX[^[\VSVVbbajowt}wk[WUSRSTUZbigccdblq]W^lsoquy~~sigfcjhgggddbcbaec``_`aa``a`a`_^^^^^`_^]^][\[\\]]\]\]__\\[^\\\\^\]]YZ\\\]\Z_^^]]]]\_]\^_[\\]^]]]^^]^]^]\]\\^]_]\^^^]Z\]_]\]]]^^^]^]]]]^^^`^_^_^_^]_^]\]]^^^`^^^\\^]Z[XV]_]\`_^`]`a]]^_`^^][XXWY^]YYZXWVYY\Y\\[XYXZ\YZ[ZYWZ]^\^]^\^^``__`_^YVVWXWWWVWWWZWUUVXqZq jZ[\URRQRQPRPPNPOQTRRTUVTSQQSQPQOPQQROPSSPORNMQPNOQPPONV[[XUSSSRTSQRSRRPNNNORRSQQRSSNOQRRORQRPQOPUVUVURPPQPNQMPQROOPMTSRQOPSRSSRTSTTSTVSQQRSTVTSQVYRSSRRQQPQPQRQQRRPTZVTUSRSUUTSSPSQSQSUSXecaccb\\]ZYZ]WRUZ[ZURQSUY_beZV`mw[UQTSRTTSV\bdeehjwbYZmtqrwz~}yxrlifcfjiihedebdbdbb`b`aa^_b`_`]]^^^^a_^]^]\\[\\]]\]]^^^\\[^\\\\^\\[Z\^]]]^\]^]^a^_^^\^^]^^^_]]^`^^]^]^_]^\]]\\^`\]][^[_^]^\_[^_^\]`__^_^\^_]`^_]_]^_]\^\]\___`_\^]]^[YW]_]___`]_^____^`\[ZYXVW[_\\]XVXVXXX^]^[YX][]WY[YWX[[^[\\Z]_`]`a`bb^]]YY[Y[]\YXWWXXVWXteoe^]VTQQRQRSRRQPOSUQRUURTTRROQORQQQQRPPQPPNPPNPTPPPQQNOV\WSUSSSSUSQSSRQONNOORRRQQSTSNPRRQQSQQMPPPRSVWTQPQPPPQNQRPQPPNPRQPORQORRRUTQRSTWVSPQTUVUVTSWVRQQQOOPQPQSTSSSQTVUTTURTTUVURPSRTWTUTU`_ahgea^YYeffWUU[YXWTRQSRRTZWQRWa]UUSSSSUSW[_fefdemk^Zfppqv}~|xturnmifhjkifegeecdbcacdbaa_ba___\\^_^^_^]]_^]\\\\]]\^]^^^\\[]\\\\^\\Z[]^]]]]\]^^^_]]]]^`[`]^_]`]^`^^]]^[]\]]]^]]]_]\\[]]]^\^^_\`^^\`]__^__]^__a__^^`]^Z\^^[^a^`__\][Z[YWY]^_]^^_`_^_a`^]\YYY[YTY\]\XWYWVW[Y]^[]YY]Y_\YY[[YZZZZ\]\[]_]^^`^]___^\XWV\__[XWVWZXVXvlp|zk_WTURTQQQRQQQPQRVRQSTRUUVSOPOROOOPOQSRQRRRRRSSSOPPPROOYSRUPVWURQQTSRQNNNOOQRQPSVVSOQSRQPRPQNPPPOSUVSSRPOPRPPTRPQNQOPPOQPPQMTQQORRTTTWTRPSY\[Z]VUUVURQSMNOQOQRRPQQPQTVWUVTTTTWSUPSXWWTRRQRTYb__b`Y\oo^VRS[\^gZRRQQQQSXVRTZmaXSSTWVVZY]fd^[Ybha^isqtt{z}|xxrmpmjlnmjfeeeeddbc`bc`bbc`^`^a^]]_]^_]]^^\[]_^]]]]_^]]]\\[]\]]\^\[Z\\^]]]]]^]]^_]\\^`^\^^^\]][`[\_]_[^^\\\^]Z]\\^]^][\\[\]][\\\]^_^_[___]\^_`__`^\`^[^`^_]a^_\_]]\[XWVY\^]]__]^]^`]_\ZZY]]\\XY\]\YYYWUX]^^_^]XX]][^[X[]YWY[[]^\[]_]^]_][^`]_]]XX[^_ZXXVUXZXXqqvthbXVSSSRSSOSPQPQSSSQQSPRRQORRRROOOQOTWPRRUTRRRPPPOOPPONTTQQRVTTQQPQPONPOOOPQRPSVZWSPRSRRPQPQPPPPORSSSSRQRPQPQUSPPPOOPQPOPNPPROPPSWVVTVTSPT]^\]ZUSSUXXUUQRPPONNQQQPQRUVUSSTTTSWVSRTRVQSQQRSTY\WVYXUT\_VX][][^lYSQRRRVVTUTS_|s\XTU]VSUWXhi`_Zaiifktxxw{z~~{tonnkkiklihfdcbcdccaacb`aa_^`___^^`^]``\^_]]^]]^_\]]^_]]]\\]]]]\^\[[[\^]]]]^]]]^_]\\^_]\]]]]^^`_^\_^]^^\\[[[][]^]]\]\\^[[]\[[Z\]^\^]]]_]^_\a^^_^]]^][\^^]]`a_^\^^__]XVVYXZ\_`_^\__^]_\\^\\^`YYX]_`\\YUVXZ[]_]ZWZ[\_^]XY[ZWZZ[]\^[\^]^]]`^]]^^a^]\Z_`_[YXVVWWW}pihb\SQSTSSSRQQPPQQQQRRQQPPPRWURQORRRRPQPSRTRRPNOPPOPPOORTSPPVRUSSPPQONNPPPQQQPQZ^YSQTSRQPPPQPQQQPRRQTTSRRPQPQRTSOOPPOPOOQQQOROQRS[XUSWUTST[_ZZVUUTUUY[VSQPOPPPTQOOPQTRSRQTSRRSUTSRROQQPRSSX[aZWTTRSYcekoaUW[d_SY][UZ`YUUS_sul[[RVVTXgg^`a]fedbkruz~}yvtuqmjifhllifebecddcbbaaa`___a```^^^Y\`^]`_\^^\]^]\^^^_\]^Z\]^^]]^\[ZZ\^]]]^]]]\^_]\\^^]\]]]]]]_^]\]^]^^[\^[[^[\[\[\]]YZ[[\[Z\\[^_^]_`[^]^]_]^_\^__^]]]\]_[]a]]]]]\Z\[VUYX]^]]_^^__^^]\^_]__][YXY]^[YXVVY[Z]`_ZVVZ\Z^[YW^Y]XYY\]^]]]\]\[]^\\`_]^_]Z]a_\_ZYXVWWwohdX[VTSSPSOQPOPRQQPPPQPMQSVVQQNORRRQPTQSSSSTQOPPQRPPNPTWSORSSWVRQONNNPPQQPQSTYb^VRRSSQPPPQQRRRQQQRUUTSRQQQRSRROPPPOOPPSSSQPQTPV[YTSWXURUY^XXXXTVUSSXYSQPPOOOSPPOONONTQSTTQQQSSQQTRQSSUVV^^a_[XTTT]ghldWXXZebVYZ[Z]cYSRXTpw\USRUTUbg___Xla]^]]_dny|{{wwsoiliglkgeheddcccbbbba__aa`a`_^]`]_^_]\_]\`^]^]\^_]^\\\\\[]]]]^^[YZ\^]]^]]]]\^_]\\]]\]\\]]]]_^]]^]]]^[\[[[^^]\]\[\YZ[[[]\Z[][\^__^]\^_^__a]_^^_`^^^^^^]\]__]]\\^^[\WVYZY[\Z^^^``_^__^_^^]Z[\WZZ]\YUWX\^\Z\]ZYXX[\[[[XZ[Z[ZY[\^Y[^]][Y[^[[_^]^\ZZZ`_^]^]\[XVi­±°³­}qilohaZTRQPOQPPTQPOOPOQOPRRSSSOOQRQNSOVWRSSRPPOQRQQRQORUTORQSWXNQPLPOOOOQPQXYXSUXUTSQRRQSSRSSSRQPSVVUTRRQQRRQQOQQPPOPPRRQPOPQQSWYSU]WSSUUVXWXWXVTSSTXTQQOPQPROQOPQMQQPRUTPRQRQRSTVZYXYZ[_^a`]ZXYVY^^b\VWZ[_ZTTVYZ\`[USWZb}vZSRTURV^hgcbapdX][YZ\^ky|zwusonlghkmggicdcddbcbba`__`aaa`]^_^]b__[`^^^^\_\\`^]]^]\^^]Z^\]_\\]YY[]\]]\]^]\^_]\\]\\]\\]]]]^^]^]]]]^\\[[[^]\\\[Z\\Z\[\\\\[[\]]^___]]^`]^^__`]b_^]^^]_^[__]]^^___]]XWYYYY_]^]^__`_`__`^^\[^^[][]]WXV[Y[]\ZYZ\ZX[[Y\\ZZXY[[Z\Z[W^[]\\YYWWZ^__^\ZYZ_^_]^`^^[^]p§®¾ÔÞ·odinn_OQRQPRPSRSQONPQNOQQORRUUOPQQQOORUQNQRNPOQROQOPQPQWWRQQSVROQQNONPPPQTWY[WRQSTSQRRORRORTSQPSUWWVVSSQQQPPPORQQPOQPRRPOOPQQTVXYZcZVSVRSXUWVXTSRRQTWTQPPPPRPQPTRQNPROSQRQPQWUUWUTUTVVXYYZZYVTRWW[Y_YXZXWa[VSVWUX\\WTU_eqcekXTRRUXV_hghholeYW\[Z]Z_tz|zvsqojimmiggfdcdbaaddabaaaaa`___^^``\^\^\\^^\_]^]_]]]]\]^]\]\\]^]_ZY[Z]]]\\_^]]]]\\][\^\\]]]]^^^]]\]]^]\\[[^]\\[ZZ\\[\[ZZ[\^\^^]^`_^_^]^_``^^]_`___^`]^^\]`^^_^]^^^^YVX\\[a^`^[\__^``_\^^[[\\\]]]^[U[XXX\[W[W^\YW[Z[][YXX[ZZ\\ZX[Y\[ZVWWWZ]\]]\\ZY\]]]]_]]^^[mz¯ØéÂr`\^efYNOPRRQPQQQRRQRRPPQQORSSRPOPPRTOTTRPQQQOQQTRMNQPPPVXSQQQQQRTPNPPOPRSRRTRQRPRRQRSTSPPORTQSQRSXXVWURQQPOOPPSRQPOQPQPPPPPQRUUWXYa[WUUTSVWTVUUTQQRQXVPOPROPUSRTSPPNQQPOQPPUXRQPQSQPQSUWWXXVVVTY^\[ZYZXZYft]USQRTUTSRT]icVSQVSX\\Z\^a]ca^`cZWY[Z[\^q||zqottqpqokhfeddebaababb`a`ca_`a`__``^^\]]_\^^]^]____\]\\\[^]\__]\\Z[YZ\][]^^[\^]\]]^]]_^\]]]]^^]]]\]]^]]\\\^\\\ZYZ\\\\[ZZ[\]\]]^\^_^^]^^^]]_\^__^^^]`^\\__^^^_]_``^^[WZ[[[_]__^a__```^Z_^[[YY\]\\^]YY[XZYZYZZ^\[XY[Y\]YWVY\[\[YY\[\\XXVWVV\[\\\]ZXYYZ^][[ZZZ\jtyÂãÁbYY[[_WOPQRRRPRRUTRTSQQPRPNPPROONOOORTTSRRSSNNQRURQNSPSOS\ZSQRPQQQQSSSQRTROQTPRPQPQQQSQRPPRUTQSRQSTSXSSRRQNOQRRSQQQPRQQPPPPPQRTTVWX_\XWUSSUUTUTTTRTPSX[SRPNRUVSTXVRPPSTRRSUSSPQNRPSSQQUSUUWXWVUUW\\[[[UZZXamUTTRSSSSSQWebVTTSX^d__VZUXXVXWb\XY\Y[\^htuokhkoqnqqoligfededaac`b``a^``a^_^^__^^]^_^^__^]^]]\_^^]^^^]]^]]_]]]\ZY[[]]]^^__^]]`][\\]]\^]^`_^^]]\^]^]]\\\^\\\YXZ\\\\[Z[[\]\]]^\^_^^^_^\__^^^^^_``\`\]^]_^\]`\^a]__]YZ\[[\\^^_```a_]__a]\]]YY[\^^\[ZWYYWYY\Z^[Y[W\Z]ZYXXYZ[[[[\\ZZ[ZZYTVUY[Y\^ZYWWXWZ\YWXXY\egjm}¦Ð¯p][^]YYTQRRSUQSSTXXXRQPQTPQQPOQNPNOORQRQRSSTTPPRQRSQPNRSQN^aZUSQQRSVXXWURPPPQSSQVQSTSRQRQQPQSSQPQQQQRQPQSRPNPSVSTRRSSRRSRQQQQRSSSUUW]]ZYTSSTTTTTSSSUSSWVUVRROVZWW]\Y[\XVWZWRPPORRUZTQRSUPURTTTSRPSUUXZYUVYW\viRURPRTTTQUSchYRRSV`e_[WWRYYUXUd[ZY\Z[\\_fljknnjjnsppnjhfffecbdccbbaab`b`^_]^]^^_]^_^^]]^__^^^^]^\b^^\[]^^]]\^\YXY[\\\]]\\_[^]]^_[]\]^`^_^^^]^\[^]]^\]]^\\\XYZ\\\\[[[[]]]]]^\^_^^^_^\_^]]\\]^]_^]Z^^^`]\\_^__]__][Z][]][\^__a``_\[^^[]]^ZZ[]^]\\YYYZ[ZZZZ\\Z\[Y[ZY[YVY[[Z[]\Z\\[\]\XVXXWZYXWXVVYVVYVVWXZY\bdhx°¤sbc`]WVTQSRTTUQQRTXYUPRSSVUUTPORRRRQORPPSUSSRRQQQQRTOOPSSOZbUVTUVW\[YXVRQRPOQQQTVQVUUVVRRQNOPVXRNPQSTTRTQQROOQUUUVTWSQQQPPPOQRTRRTTV\^\[TRSSSSTSSSTVVSVUTUSRPUXXXVVUXVSSSRQPOQQQUZXTQQRWQTNRQSPQQRRRTVVTVYYZaZSQSOQTTRSRRZfdYSTTajaZWWVTTUVV[aY[Z]__^covvtqkfejnpojhgggcdbbdcabc`aa_a`]_]^]\``]^]]]\]^]^^]_^]]_]^^\]\^[^^_^\YZ[Z[\]]\]^\[\\]]]_]]]^^^\]]^^\\\[]\]\\]\\]\WZ[\]\\[\\[]]]]]^]__^^^_^]_^]]\[]]\^]]]\[Z_^]^_]__\__^YY][Z\]]]]]__``^^[YZ[\\[[]X[\Y[XWZ\][][Z][YZ[][[[YX[WZZ[^\][Z[\\^]ZYXVZ\YWXVXTXUUWVTUZ[ju~zwwzda^YWRQQQQQQRSRVVTQRTTSTWWNRTX\UQOSQPRTSTTSRRRRRQQPPRQOTTPTRRSUWZXSSPQSRPQQPSVSWTSTTWQPNSSXWONOQSUVTQPPQPQQPTUXSUUQPOOMNPRRSQSUV[_`d^TQSSRRSSSSUWVTUTSTTSQTVVWUUUXVSPOQTPPQPRWZZTRRQTTURQRWTUTTPQRTUVWXWZieUSQRPSQSRSSRYn_WSYcg`[VZf^SUWWXebb\`konntxvpnmhadlpoljjhddadedbbb```a``_^]\]]a_^^_^]]]^^]]^]^^\]^]]]]_\\\_][_ZVZ[][\[Z[\\Z[\\[]]^]_^^]`[_^^\]_]Z\]\[[]Z\^\X[\]\\\\]]\^]]]]^]__^^___]^^]]\[]]\^]]][ZZ_]_a^]^`_]_]YZ^]^[]]_]\^____`]ZX[]\X[X[[ZYXWVZ\\[]`^\\\\ZYZ\[ZZ[]W\Y][Z[]ZZ[\^]ZXZZ\\XVWVWVUTYXX][\ À»¡¦ª§§ {hf`[PPQPRQQQTSQTQQRWVSTURQSVZ[TSSTQPQRSSSTQQSSSTSQOPQNQQRRQOPPUWUQVQPSSPOQRTTTVWRRWTPOQTUXTSQPPRTRSRPPPPPOORSTUSQQQOMMPQRRSQTXYaehi`VRSSSSSSSSVYVTTRRSUTSTUUVUTUXVSQQSTPPOOUXVVVRRSSUSQTVVSUQRRQRRRUXXVUkoXSPQSSSSRSTSS`pZVZ`c]\Y\ig]YWW[c`[^drunmnqtnnlfeflnnlhhhgebeddbdca`c`a`_[[]\^_^^_^]Z]_^^^_`^\\\]^]]]\^]^[^Z_]]V[\\]\[[]^][Y\]]\]]^^]^^\\]^^__\][\\\][\]]]Y[Z\]\[\[]^]\\^]^_^`_^^___^^^]]\Z]]\^]]][Z[`]_`^]^____^\Z\\^\^[]][Z^_^^_]Z\\]\[\]]\Y[XUXZ]]_^]_^^^\\[Z^^^[[\[\Y[[Z[_\[[[\[\\\[Z]\ZWWWVUVXVZ\\_ÉßäÃÌÖÑÅÁË¾rf_[QPPTQRSPRSTQQQPZ[TSSQPRSVZUSTRRPPPRRQPQOPTSTPPOPPPPOQQRQSRQRRQWSRQSQORRTTUWUSUVSPRQQSTWTWSPRQSPRPPQQQOPRQPOPPPONMNRQSSQRVXhsqqj_XURSSSSSSRSUTUSQQSWUTSSTUTTVXVSRSVUQPPOTVUUVSRRSSRSUYWTUSTSQQSPSVVVTcgZRQRSRSTRRVTXYzYW[]\YW]oilaZX]g`V^ittpjorvtqjidfkkjlkjjhfddfbcdb_`_bb^^[]]]]__\]]^]]\]_[^^^]\\]_\[^^]][]\]`]]VXY]\]\^][]]Z[]\_\\^^]`^`\\^]^^]_[\]\[]]]][[[\\\[\\Z^_]\]^^__^^_^_```_^^]][Z]][]]]^[Z[`]__^^^___^\ZY\\^^_]`]\]^`^`^[[\Z\^][]_[YZT[YY\]^^]^]]]\]][Z^_\]]Z^[WX]^\Z[[][][ZYZXYZ]]XVWVWVXW[]]¨Î×äÒâöõèàÝ¾oc^XQPQRSSRQQRQSQOQW\STRQQQPRSRQPQSRPQQRPPNPTTSOQQRPOOUTQQQSSUURRQQWPSTTPQUPTSSTSSVTOQPQUVZ^`TRPQPRQOPRPPPQPPPPPQQOONPPPSSQYb]qxwhZXWUUTSSSSRRSSTTTTTTVVSRTTTUVXVTSUVUQQPPSTTUVTSSTSRSUWZYWURQSQRNOUUUVVXUUSSRQQSRQTTY^^UZ[ZSX^dgsjirjlfZ_ilppusturomgbhjiilljkkeffedcda`]`a`_\[]^^__]^]]^]]^[^^]]_][^]^]\^][[\]][]\[XW\]\\\^]^_\\\]\]]]^_]]__]\]]\]\]\^\\\]]\\Z[]\]]]][[^]\]^]_`__^^]aa`___^]][Z^\[]]^^[[\a]__^^^___][YY\\^^_^_\\]_a[a`YY\[\]\^^_]XXXUWX\\^_Z^]\[[]][Z^^]]\]\[ZXZ\_[]Z]\][XYXWWWVYWWWVXYXWWZ[ ªÇÌÇæðòñÙÓ¦zkibZRQPPSQPPRQQOQRSRVSRSPPQSQRQRQPPRQNNQQSOPRQSNRQTPNQTRQPORSSQPQQORSUTVQPRUUTTSUSQQPPPOOQSWXUUVOSPQOPPQSPSPOPQSSTQPPPRSRSTYa`jwiUWUVVWTSQSSRRQPTXUVUWYVQQSTTWXWUUXWVRQPPRSSUVUUTUSSSUXYXWURRRRPPPUWTRSSWWVSRQPQQPQTV^~`Z^ZYXYlh{y|mjic]]blrutrspplebhhhiffigkggfeedcaacba^_^^]]_^_`_\^][_^]]`[]]^\_\]^]]\\^[]][]\\Z[\\\\_[^_[^]\^\^]]]_^^]\\\]][`][]^[[[]\]\\]]\]^]\\]^^]_]\`]^]_\_`^`^a_\^]\\]][]]`_[[\a]_^^^^^_^\ZXY\]^^__^\]]_`\`_YY[]Z[_`_`_[ZVYZ[]]_^]WZYYY[ZY\\^]_\Z\[[YX\\[[[[[ZYY\WYWXWUWWUUWWXYVVY£¨­¤¬ÐÛÉÀ³¿f^eYVTSQORRQRRQQRSRQPPQPROOSSSSSRSQOQQQRQRSRPQQSQSQRQRNSRQPPQPRPOQPQSTTUUPQSVVYTSXTPORSQRQSQOQRVVUTQQNOOOQTPQPTSSZaZSPRSRTRUUY[\n}fSSUVTWTTQRTRSQPSUWVUY^TRRSTUWVUTTYZWSRQQRRRUVVVUUTSTVXYXWURSSRPPPTUSRTSSSTRQPQPQRRTUXh¤][YVX[jq~~pypf[Xdmptutroqjdbdikkhhgfkgiddgeb``aaaa_^^^]^_]]^a\^\]]]^]]\^]]]_^\_\]\^\]]^^^\[[]\^^]^]\^]\^`^`\[^^]\\]][\]\^_][][^\[[]]]_]^^_\[Y[\]^^\]____`^___``_``^\[\[\\[]_^]^]b]`^_^^^_][YXX\]^___]\]]__^_^YZ\\Z[__^_a]XWWZ]]^_^^YXX[XZYZ\]]\]][[\[ZZ[[Z\ZYZ\[Z[WWUXTWVUVWWYXVVWW¡~±Â{_d_YZVTQRSTRRUTRSUUSQOPQRNQTPUTSSSUPPRQNOPSSOPPTTRRTTPSMRROOOROROPTSSRSRRRSV[ZWYWXTQQRRSTSQPONOPPPTSPNPPOPPQSSUXWXcd[WRRRRSTRTU_uaRTVWUXRTPTTUTPPTTVWWZ]]SUUSVTRSRSWUVQQQPRRRUWXXWUTTTVWYXWVSTTRQPPSTRRSRRRSRQQRQSRQTWYXgymZXVVXZdkovrpkpml^V_ffrrrsolibadilkjffdhjggfgcc`abcb`]^_\]`_]\_^]`]]]^^]]^^\\\]_^^]]\\]]]^__\ZZZ[_^^_\\\]]_]^^]]`\^]\]\[]^^\[]\^]]\[Y\[^^^\]^Z[Z\\__]^^^_^^^_`_]^^^a^\[\[\[[\\^^^]\^]_^`^_^_][XXX\]^__^\\^]___^]Z[\[Z[__^__[XWWZ]\\^a`]\ZZX[X\[]Z]][\[[[[]^\[[YXZ]Z[\[WXYXWWWWXX[WWXXXuleo¯£obldYVWSPQQOOQTSQVWVVTPORRQPWRTUWRSUSRRRQPPRRRRPSTRRUPQROQSORRQRQPPTRQOPQQPPTYZZYZXWPRPRURPPMOPOOOPOOMMORURRPPQXn]bbkgZPRTQUTSUWe|yk]]edZZPSPOPQQPPSTWXW\_\XXTRSRNPOQRPRPPQQTUUZ\[[YUUUUWWYXWVSUTRQPPRRQRRRRQSRQQQQSRQTWYXY][WYVTVZbc`cddedin`[jmmsvpnlkkhddgijigedhiighdbda`b_a`\]^^]_^\[]^]`\]^]`_^^]]\[_[]]]]]^\\\[]^Z[[Z]]]]]\]^]]]\^Z_[_^\^^_[\]\\]\]]^][^Z[]\^]_]^]\^\\]^^]]^]_`]]_]]^]_^^[]]_\]^]_^]__`_^^]]^]]^^Z[WWX\^_`_][\^]^^^]\Z[\ZZ\__^_]YXWXZ]\]^`_\[YX\[[\^^\]\[]Y]\\\][[ZYY[\\\\\ZYWXWWXVXZX[[[ZWb\Zh~yjlgWTUQRSORPRRRPTTRSSQONPQUVTSTVTSQURQOOQPOPRRRUUSRQOQQQTURSQPQORPRMPNNSQPSSRTXYYXRQQRPQQPNPORPQPPOOMLMNNNMMNPRWXhlx~aWXWUUVTY]du~vtwtm`WVTPOROPPQRPTUV]ad_`aVQPOPQRQPOQPQRSUTU^\\\ZUUVUWYZZWWTVURQPPQQQRRRQQRRQQQQSSRTVWWX[YYZ[YTVag__hmoiqqc`gqqrtrtmmkffdcdhhffeffggdedb_c`a__[[]_]]]\\__\\\]^^_`]_\_]\^\^^]]\__^]ZZ[\[Z\\]_Z^^\]\\]]]]]\]_^^_b\]^^_^]]]]^_]\]^^_\\[\\]\]\^]^^^_\^^^^____\__^\_Z_\^_^\_^]a^`]\]_^^]\[[YXX[a`]a_][\_^^^]\[Z\[YZ\_^]^[XXWYZ]\^^`_\[YY\[[[]]^[^W]ZZ[ZZZXZYXZ\\Z[Z[\YXXUUXUXY\[\ZYX{aZ^bf~sxqdb^UTSQSPQOOSSRPRQQPQQQQPQQRQPRTSTUXRQQNRPPOQSUSUUSQQQSSUUOPPPPQQOPOOOQRQPRPQRSVSTRORQOQPSQPPPPOSPOMMLLNNONNOPRXil|¦bali__Yaa^dpr{oaWQSTPOQRPRRRTV[^`Z\]Y_\UVTTUSRQQQQSRRTTSZ_]^YUVWYYZYXWUSUUQPQQPPQRRRQPRRPPQQSTRUUVVXZXXYZYTW```dprpovvgXdjmuwwwpqmjfccffhhffefhgeebac`b^`^^\_]^^]\\^]^]]^]^_^__]_]^]\\]]\]^\]]YWYZ\Z\\\^\^]]]]_]\^_^]^^^]^^]]^_^^]]]^]][\]]^]]\\\Z\^]]^_]^^]`\`^^^^]``_^\^\\\^__]`^\^_Z]^`^_\]]\[YXWW]__]]^\[[^\]][\[[][YZ\_^]\YXXWYZ]]^^`_\ZXZ\[[[\]\Z]W\ZZZZX[YXYX[Z[ZYZ\^\YVXVVVX^[^[YZYx`Y\_btwkgd[WYXTSSQPPRORSRPPSPRQSPTVRPOPRVUTRTWPSRQPQQPQQSXUUWQQQPQTRNPQPPQPPPOROQPPOSOSRQQPPQRPOPPNPRRQQPPQNMNNKKOZ]SPTRV`gq¾Ë¬~efg`VWZ\amp`WTQQQQQRPTZY[_a^ZXUZYW[WW[[WSQQSWXVSSSSRUV]^^ZTXVZ[ZWVWSSUSPPQSRRSSSRQPRRPPQQSUSSTUUWYVWXYYUX__`aklkjomk]_jrsvwtqtxrfccccbfgfceggfdbbba_aa^^]_\^[]\Z\][]^_^_`]\]]]^]\]\[][^]]^[YVXX\\\\\][]^\]^]]^]\^]]^]]`^]]__]_[_\]][Z[[\]\\]\\\[\\]_]\]^]__^]^`_a^_^^]][]^__`]^_^_\\Z]\]]\\^^^ZXWW]`\\]^][a^Y\\[]]^][Z\]_^]ZXXXWZZ]^^^_^[ZY[\[\[\\[Z\W[[ZZZXZXXXXXZX[YZ\]^\YVVWXX][^^[[[u_WZ\_jvmd`_XUVVSSTPQQQNRSRQNSNSRRUTTVQOSUVRQSQRQRSQOQQRPSTVVVXQQQQNPRRSRPPONQOPRPQRNPPQMPPMQSQRPNMOQOPRSSTRPPQNNJMOTaSQTR\bd~ÁÌºzbaga][WVW_^XURQPOQRRU[_`\WXXUTTUZWUQSUWVSZddjeXRRTTUWY\Y[ZVRUVXVTUVVVTSRQSUUURTRQRTRRQQQRTVTRSTTWXUVWXYVY__`^fgffhfk`_hnpqroqssqicbfdbhgdbefffddcaaba_^[\_`]\]]Z][`\]^__^\Z\\]]\]]]]]]]\\\XWUYUX\_]]^]\][[\\[\^\^^[^_Z_^\^^^_\\^]\[]]Z[\[\[ZZ]]^^\^^^^]^]`\a^_^]\]^\_]ZZ]_^]^\^[[_^]^^]]]_]]]^]YXWY\_]\_^^]_^\Z\_^^^[[\\\\\[ZYYW[[^_^^_^[YZ[\[\[[[ZY[WZ[ZZZXZXXXXXYXZXZZ[_ZXTVXXZ\]^\Z\]r^VWY[`gc]Z[VSSUSSURSQROPRRNSSUQRQSVSRRPTUTTSQPQSQRTQQQRQSUWUSTVSSOPRW\\TRSONQPPPORQNPPQOPOORRSONONORRRUWUTRSRONMMMOOPMORYbfj{¯·¶¨pjeYW^faXWUWXTUSQPQRRR\\UQSRRSSQRWTVSQRTSV`f{qqgWTXYYY[YWWUXWTSUXXSUTQVVRSRRSUVRRPPRRQSQRQQVVTQSSTWWTVVWYWZ^]][abaab`kd`fkmnonorspjdaigghhedefeedcdaaba]]]]__^\[^Z]]]`]]__]]^\[^]]^^]\]_^\]^YUXYVXZ]\`[]\\]]][[[^^\^[_][^]\`\]]\\\\\[^]\Z]^]\\\\[^]\_]\^]]]]^^^^]\`^^\`[[Z]^]\\]]\]_^^^]][^^]_[X\WYWX\]]]^^]^^_\Z^Z^`Z`\][[][[ZYXWZ]^]\^_^[Y[[\[\[ZZYYZWY\ZZ[XZXXXXXYXZX[[[]YXTVVWZ]^]YY\]YWUVWXVXYVVVSQPTRSWUURSQRRQNRRTQQQQPUMQRSUTRSSSRRSTSSSQQRQRRUVWUUQPUVY\WRRRNOQRRUTPPPPPPPPOQOQONMPRPQPRRSRRRQRTQNNNLKKNORTWYfhy¹µlb`ZW_icZWUWSTTTQQRRST\VQQPPSQPPQSSSRQRPZ]Z^mieYST[[XYXWVTTVURTVXVTUPTPSTURSSTTSRRRRSRQQQPQRTRRTSVXUUWWWYX[^\ZX\]\][`kg`dhklmmnrspjdbhffgfeaddeecbc`b`^]^^^`\]]]\]][_^]^_^_\]\]]][[^^]]^]_]]ZXZZWYY\\_[\\[\]^\\]\[^^]^^\]]]^]\]^\[\[^\]`\\\ZZ[\Z\]^]\]^^]]_^\]]]\[_\^]^\[\^_^]\Y[\\^]]][_]`^_[_XVXYZYZ[[\\][]^]\Z[\_[[\\]\W\YZXYWYZ[\[]^]][Z]]\[][ZZYXYWX\Z[[XYXXXXXYXZX\\[\YXUWWWZ\\\XY[^STUVUUXTWSPRQPNSRUYWWSTSSRQOQQTQQQQPTMQPPSSQSRTSQSWUSUSPOORTTXXTQPTTVTQTQRUPQTTTQPPOOOPQQPOQOPRPPPUTQURSPQTRQPTUPNOMNOOOPQPYffkn¶²®{[WX]_gpdXUVVQQSSSUQTSWQPRPPRQPQQPSWRPPSbfWW][WSSTZ^UWYWWXUUWUUURTVUTSQRSURRTSSTQSSRRQPQPOOQQSQRSVXZXWWV]ZZ\[WUWXXYU`kkabehijllqspjecgffgfd`bckkhd`ccb^__^^^^]]^]_^][^^_`_^\^[]Z]^\]]^]\\]^^\ZXZYX[\]\\^\[\^]][Y[]]]]^]^^^_^^_]_[\]]]__[[\]XYZ\]]]\^]^]\_]]^]]^]\]^_^][^`Z_]]^\\[]]]]]]^]\^]]\ZYYTVYZXY\[][Y[^[YY[]_\]\]^ZV[YXYXWYZXY\__^\^][\[]]\[Z[XYWX][[[XYXXXXXYXYX\\[[XXVXXWZ[[[XY[\ORSTVXYWVQORRRQSSX[ZYTUUSRQPPPSRRQQQSNQPPRSQRQRSQUUUSTSQPPOSVUSPPSWVSTTVRSWRRUVPPQPOOQRROPOPQQOPQQUUTTQQOQSQSRSURPQRPOPNOQQQZ``c¶¨ oXXZaY[]\YYYXSRSRWVQTYRQQTOOOQRQPPSVURPOSTVTRSVTUTUXSSUVX\WVWVSSTTUWSSOSRQQPQWVTQSRSSPQRQQQPQRQQTTWXWWVW_WVUUUTTWWUU\kobabfghkkqspjfdgffgfd``cqqni`bba^_^^_^^\__^``^^^___]\^][]Z^^^]]\^]\[^^[XWXYX\^]]^^]^\_\]Z]][^^]_^]]]_^]^\\]]\\^]]]\][ZZZ\[]]]\`^]^\]^^_^^^]__^]\\^\]^^^_]]]\]][^\]]\]]\YWVWTXWW[X^]^]\\XZXY\]^^]^]\ZWXXYYWYXXXY\^___a^[\[YZ[[ZZWXYZZZ]\XYXYXXXYXYX]\[YXXWXXXZ[ZZXY[[ONQTUYXXUPRQRQSVV]a][VWVTRQQPPSRRQQQRNQPPRSRRPQSRUUUSRRSNRQPRQPQWXTWVUSTVTVUSTQPLRPNSUQPOOPOPPQPOQUSRQNPOQRPUOQPPPSROPONORQW][Wb¤zaZZ][\WWW]^YUSRSUZVX]WTSPVPPQSRPRPPWSRQPPSTQORUQTQRSQTRRUZZYVTUTUUVWUSSQPQQSRTUSRRXRPORSRPRRPPPQQSTTWYTTW[YTTUUVRVVWXkpihgfefjjqspkgefffgec_^cwwsiabba^__^^^^\_^^__^]`_^_][[_[_]]]^`][]^^_\]YUX[YY]][]\]\]]_\]\[[[_[_\^[\^^]]\\]]][\\]]^\][Y^]\]^]^]]^_]\^_\[]_`]^]]\\\[]^\^^^_\_W\[\]][[]]^_ZUVXWWV[[Y]]]]\ZX]Z\\\]^\]]][XZZ[XYXW_W][_^_^_]\]][[ZXZZYZ\Z[XZXXYX[XVXYYYX^\[XWXXYYXZZYYWYYZRPORTWWYWUWVUUWWW\\[]WWSSQPPOPQSSQQRQOQPPQSSQOPSSVVVTSRRORQPRRSWVURTVTTSTVTTSRRQOVQPYXTQRNQOPTROORTSQOQQSTQQQMRPPQQRMOPOPSRSWXSa|ynbWZ`e_aXSTZXVWURTUVW]ZZXTSVSOOQQQPNQSSQQQQPQRQRTSQOSTSPRPPUVVUVUWVUTUURQRTURUSVVSTSUUSRRSRQOQQPPSRSUSSWTW]bSRUTUTWTWXUdf^]^]ahjjnsomhffffgec_\c}}vgbbba_`_^^^^]__^_^]\___^[]]\\^\][]_\\\^]]_]XUY[[]\[\][]\Z\]\^]]\]\[_][]^]]^]^^]]]\]\\^Y\\[][_\]^^]^_\__]]^__^^^\]^\Y\^]Z]]\\\[]\]\[^[_][___^\WUWWWXW[[[\\ZXX\^[]\_`][^]^\XWZ\XVZ[][]]_]_^_]\]][Z\Z\ZYZ\][ZVWXWY[YVWYVXVY[[WWXYZYXZYXXWXXXQNNPTTWXWXZXWYUVVXV\\TUSRPROQSQSTQQROORQPQSTQNPSTVVWUTRRPRRQRRSWUTQSSTRTUWVRQQQTR\WTWWUPOOQQSRQPQRTQQQQVWURSTQTSRSQOMOQSPQSVZYUZ`\XWSU]a^ZSSSTTSSURWVVVX[WSSTSUUPOQQQQPSPQQORRTRQSTUSRRSSRQTVURRRTURSRSSOQTSUTTUTVVUVTSXWVQSSQQORRRSSSTTTSRT^_VUYWVXUUUWUbe`^\\eoronnmkighghigc_[csdcbba_`_^]^^]`_^_^]\^^^][]\\\\]]\]\\\]\\^_\WTXY\]^]]]\]\\]^]\]^_^^Z^^]^]]\_]]]]Y^\\]\[[]\[[\\\_^^`\][`^]]]]__^]]_^\[]][\\^][^\]_[\\Z^[_^`^`]WWYXWWX[YY\[[XW[^\Z^]_^^[\\\[WWYZYWYYZ[^_^_b[^Z^\^[Z[\[Z[Z[[[ZVVXWWXXWXXYXXXXZWWYWXXY[YWWWVVWRPNOVWXVVXYWUSSUVY\XVVTRROSOQUSTSQRRQPPPORQRQPQTVWWXVTRRQRRQRRSWUSQRSSQSTVUSQTVRV]YWWVQPQNPQSRQPQSTSQPOPSTRQQQQQRRMPOOQUORPVYVUWTTSSTTUUSTTRSTUTVVVVYZXZSRRRTTTRQQPPQQQQOQRPOQSSSSQRRSRPQRSRVVSPPPPPTSTRRPSTTSTSSSTWUTUYVTQSQQQQSTQPPTXWUUVSX\WVYXW\[YXUV\pkfsxty|romhikhigeb_cx}gbdbba`a_^]^^^`_^_^][^^^]\]\\\\]\\\\\]^[\^]]YUXY[]^^^Z[[]]\^\Z]^]]ZZ]^]]_\]]\]Z\Z\[[\]\[\\[\[]]^^]]^_^]^_]\\]^]^^^]]]]\\^]^^\]^]^[Z[]]\`[]\_[\WZY[YZ\[[\\ZY[][\]^\[\ZZ][\ZYWVXXXYXZ]^`^^^^\\^_^^]\_Z^\[[ZYVVVXZXWXWXWXX[ZYWTYVVXWVWWVVVUUVQPMOVUVUUWXVVSRRTWYXVTTRROPPRUSTSQPOPPOQSTRQQPSSTRUVTSRRRRSRRRSWURQRTSQRTUTRRTURUZXWX[QOOPPUVRTOSTSRQOOPPRQQQPPOPPQQNPPSQSQRVTSTRPTSSSSRSTRQRTTXVUTWWXW`XRRPSTSROQOPQPQRQPRRQQQRSRRSTTQPOQSTQRSQPPQTRTUSSSQPRUSWTTVVVUVVVTOQSRQOTRRORSSSTVXVZYTTTVXZYZXTX[m§yqommkjpkhfgdwhecbbca`a^]___a_^_^][]]^]\]\\\\]\\\\]]^[\]\\ZXVVX[^]]Z]Z\\]]][\]^[Y\]\\]\_^[\\[ZZ[Z]]\[Z^ZZ\]^]^^\_^\]`^]\__\]^___^][\[\^^]]]\][]\^[]]\\]___]W[]Z_WYY]]Z\Y\^\]ZZ^\[]^[]\^VZVWXWWWWZ[^^]]^``^^^_]]^__]]YYYZWWWXYZZYYZXXYY\XVWWXWVWVUUWWWUVWPQMPTVVRSTUTSSTSRTUUSQPOPPOQSSSPUQSPRPPQRUSRQPRQRRTVRRQRSRSSSRTWURQSVSQQSTSTSUUSTWUVVXPOOQUYWPQNVSUSOPQMPQQQQQPPOOQRQROQTSPQRQRRSQRSSSRSSUSQTSTWWQTVTUT][SRRRRPQPOOOQPQQQRSSQQQSRRSRTQSTOPRRQRSTRRSRTWVSSQRQSUUSUSTUVVUUSSPPTSTSTTRQTSRTSUTXc]RUWYWUXUUVX_iÁûÆ£¡wtvusonmg`][txbe`aacac^]`a_`___^][]]^]]]\\\\][]\]]]^[\]\[YXVUW[]\[[\]\]\]_\\\]Z[]]]^]]\]\[[YZ[[\]]Z\Y]ZZ]^_]^^^_\^\]_^]_^]]]]]a\[]Z]\\]]^]\]]Z]Z]\^^]]]]]^XZ^^YZZ^]ZZ[Z\^]^[[^^[[[[__\Y[WWVXWZVY_^]^^_^^^^\\[[^^_[^U\\]XYXYYYZZZXZZXXYVXWVXWXUWUWYWXVUVTQOPPRTVSTSRVQTUQRSRPOQQQQPPUSQPRSRSRQPOOSQPPPQQQRTVRQPOSPQRRQNRTSSWXSQQSTUVTUTSSTTUUUPOPSVVUPQPUVWTOQOPOQPPRQRQONOPOOOQRQSQPQPRUQUOSSPSTSRRSQRUXWUTRTSZYSVRQRRQRRPSRTQSPSTRPQSUSTVRSX\ORRSSQRSPRSRSQVWTSSUPRSSSVVTTQTVRSRRSSUUUY\XWXUUVVWSTTSVUW^ZZ`fkjdajÌð¿ojhjjhea\Zm^c`babba`__``^`^]]\\]^^]^]\]\\][]\]]]^[\][ZYXVUW[\[[[\]\\\\\^^^\[\^[]^\]]^]\[Y\[]\]Y[Y\^ZY]^\]]_^^]]_^]]^\]_\]]\^[\]\^]^\^`^\^]\]][\]`]`]_[\X]\]ZY[^^YZ[\\[]][Z[[[][Z_`[\YVWWXYXX\^^__^^`^]^]\]_]]\\]Z^_[Y[ZYWX[\[\]]ZZYWWVUWXWTXWTUWVVWXSQOPQQVUSTRSRQTTRRRROSRPQQPQSTSRQSXRRQRPQPOPPRSRUUTTTRPPRRRRSVORTPUXYSPOOSWYVVTTSSSTSRPOQTVTTPQSTUUSPRQQQRQPQRPRQOOOOOOPPRQQRPQSRSQSRRPRQQRRSOPUUUUTRRSZ]TSSQSSPSPOSQRURQQSSQQOPRUVTSUWRRTSTQPQQQQRRTQVURQTRQRUWURTSQQVSRQUVTUTSX_`[YSSUUUSWSYXab_Zj}xmk¡­ÅÓ×Ácghghigb^]c`eaabbaa```^_^`^]`[]]_]\\]^]_\^[^\^]\^[\][Z[YVUV[[[[[\]\\\\\]^][[\]^\\\\]^\[\ZZ]\ZZX\]^][]^]]^_^\[_]\]\\^^]^__^]\a[^]]]]^]`\^^^^\\[\]^_^\_\YY\]^\YZ_]\^Z[ZY\\]]ZYY[Z\_][ZXWVWYZXYZ`_^^_^^`\\[[^^]]]\\\]Z\[[[YXV[Z[\_^^]YVVXXVVXXXUVVVVVVWPPOQQMOTROQPOQQQRQTPLROPRROOTVSRRSTRRQSPRQRPPSRORXYVTRQSRRSTVSNPPRUVVOPQQRWYTSROPQRTRPPPQSSRRPQRSTTRQTSSSQQQRRQQRPPOOOPPQQQSSQSRRTTRRTQRQQRTQQSQSRSSQRS\ZTTTTSQPQUNRPSQPRQQQPROQPRRSVURRSRQVTTQSQRSQSSUUQRRQPSTUSSTSRTRQSQUWTTRVX[]VRUVUWZYWY`Zfe\_kzy{¢³ÀÞçäñèÙ¬iihgggd`]^_klefc`ab_``_a__^_]]_[]]]]Z]^]^\\^^\^[^\^[\][[\YVUV[[[[[\]\\\\\]^\[[\\][\\\\\\[]]Z\[[ZZ\[^]\[_^\\_]^^`__^^]^\_^]^]^^[]\\\\\_^\^`]\^_\Z^]\]^^][YZ[[`][Z]]\ZXZYZ\]Z]\YX\^``YZYWXWXYZWVV\]]a`\`^Z[\[__^_^]\Z\^\[\ZW[YZ[\YX\[[XVXXWYYXWZWVVVWWVTNOPPRROPROPQQORMOORQNSORQQRSRSTUSQRQPRRPSOSRUSTRRTTSTSRTUTTTSQPQRSVZRQQSQPRTVURPQPQTQORQRSQPQQQQRSRQRUUTSQQSSRRRQPPOOPQRSTTRQRSSU[ZSQRRPSQOQRRPRPRURSSUZ_UTWWURPQQPQQSPPPPQPRRPPPQPRSRRSTRQTWVSRTTTSRQSSRTPSRQRRRRQRSSRQRTTSVTTUWY[TSUTTX^^X\ZY``a_eÈ¡~½âêçÓ¾¬wlecedgefceb`accba``a___`_]a_^^\^\^]\]\^_]^]]\\^^[]]^]\\]\^ZVUV[[[\[\]\\\\\]^\[\]\\[\\\\[\[]\Z\[[]\\[\][^[^_]`^]^`^_`^^]`]]]]\__ZZ\\]__^]]^^]][_[\]\^^_[ZZXZ]^_^_[X\YYXWV]]_Z\\YY\\]\ZZZZYYYXXWWZY\__^\\]\[]\Z^\^]\YZZZ[[ZZZZYZZ\^X^^[WWVWUYYVWXYWUYWWWVOQPOPPOPOPPQOPQPPPRQPQPRQTTPRSTVSRPOQSQQSQQRVTWRQUROQQSVWUTTTRPRTVZYWQSTSMQSQQRPPPRRPPQRSSQOQSRRQRQQTWUTRQQTTSSRQPPPPQRSRSTRRSTUSZVRQPQQRQQQQRRORQSTTSYW`YZVVSRPSRQPRTTURQSQQQRPOPRQQQRRSQSSVTORTRSTSRSRRTRTQRQPSSRQVTRQRTRRTSSSSXZTSQRVVZ\[YYXY\\\g¢ß}w¸ÜÝ»pwnfegefffgefibebbdbda`^`^^`^^___]\\_^`]\\]\^[_^^\]]]\[\]]]]]]\YXUVX\[]\]^]\\[\]^[[\]\[[]]]\[\[]\[\[[\\\[\\\Z\^]]^^^^_^`^__^^]]^^\][[__\]__]]]]][^\\[^]]\]]\XWY\__`_^\YYYV[WW^]a\^[]]\_][[Z[[WWYWYYWYZ]_[]][Z[\]]]]]]\^ZV[Y[\\[YXZZ[_[Z^YYXVXWWWXXXXTTWWUVWUQTSRQNONPQPRROPQRSTVQQOTQTOSSRQSPTPNPSRPRQQSRUWUTORQPTSVUVTSQRQSTVWUSSTUQPRPRNQSOQOROOQSSRQOPQPQQPQPQRUTRQRVUTSRPPPQQRSTRSUSTTUTRWSQQQQQPQQQPPQQPRRURSVTbecZVQQSSRQPUWSRTUTRPQPPOQQQSQRPRQTSSQQRRQRRRRSSSSPSNRPQSTQUVTSPQRQQSSRRSUVVUSWWW][YYUWX[[Ya­knjjkotcbmjedfebdfedfecdcacdaac^`_^]^^`]]]\]]]^\][[_^\_\\]]Z\^[`\]]\^]Z\YTWY[Y^\^_^]][\]^[\]]\Z[]]]\Z\\^\\\[[[\\[\\\Z\]]]]^`]^]]_`^]`\___\^`[]`^]]_^]_]]\\^\Y_^_][\\YX\]_``_^][XVXZXW[\^\\]]\^]ZXWY\XVXYXXXVXZ^\^]_^[\Z]^]\^]\]XZZ[[[\[ZZZ[]^^\\\\XWZVVWYWYVVUWVUUWVVWYYUOPOORV[SROQTVVTTSRSOPSUURSRQSROPRQQRSSTTSRSOOTRRSRUVSRPQSTTUURQTUQRRPPQSQQQQPOQKPQRSQPPPPPPQSROPQTURRQSTTSRPPQRRSTTQSUUUUVSQUQQQQPQOPQRQPQPRRSTTUYda]\`\TUTSRQPSUWSTWXUOOQQPRSPQOQQTRTTRSTQPSTQQTTTSRRSQQPRSRRXSTRPQTUSRRQTRR[`[UVZ]\WVUX\Y[[Z[ahfad__aojh_WX]cfdffeeggfecgeeccbcda``[_`]]a_]^]]]]\[]_[]\]^\\Z[\[]^[^]]\Z]\[[[XVXY^Y]^\_\[]\]_\]^^\Z[^]]\Z\\^]\\[\[\\\]\\[\]]]]^_]]]\]^^[`][__[^a_Z]^^^]]]]^]^`\_\]^_\_W^[V\]]]`Z]]ZZYXYXWXYYYZ[]]]^YWXYXXX[[XXWWZ[Z]^\]\[Z\__^^]\]\XZ[\][[YZY[\ZZ[]\Z[XWYUVXVX\VTWWWWUWWW[[XUMOOUX\`VRQQSSVTQRROPONQUVRQSSQOORQRRPSWURQQPTVTUTSUSVSRTVSTQSRRSRQPQPQSQQPMPPOPROQPTROOPQQPQQPQQQRTUSRRTTSROPQTUTVTQSVVWVURPSQQQQPQOPRSRQPPRRTVXZccTTVZ_[UUURQPOOPQSTVVRPRSQSURRPPOWRUTRRVPQSSQQQRRQSTTTRRQRQOPSTRRQSTUUTTSSRUYXTTUWZXWVZ[ZXWY^Y[dcab_dldjdXWX^bbhhgghhhhhhgedbcdbb`a]``b_^^\_[_\\_\^_^]^^\[]Z^\\]\]\_[\^]\^ZYZWVY[]]]]^[Z^[]^Z_][\[[]^^\Z]]_^]\\\Z\\\]]\[\]]]]^^]]^\]]][^][^\Z]]\^\_]]]\^^^^^^^\^]^_^^_Y[X[\^]][\XY[ZZXYZXYWZYY]_\[YXVUWVWY\UWWYZ[\]]]]\\][]`_^]]XZW[\\[^\Z[ZZXXXYYYXYXUWYTUXWZUUTYXWUVWSXVUPLOOSVXXXUURQQQSQRROPQOPTUPQSUOQPQQQOSWXRQSTQSUWWUTUXUTQSRSRTTRQSRTROPQTSNNNPRSSQRPPURUROPQOOQOOPQRUXXTPRSRPNPRSSRURPQUZYWTRPQQQQPPQOPSTSRPQRRUXZY`]TSUY^e[YVSSOSPQOQPRSQSUTQSVUUUROXUQRROWQRPPNRQQROSTSRQQPRRQQRSQROSQUVTVWTRQSSRRVYYWVX\__\Y]cfZekquljfaikaWYZa`fdhfhjhigeccdbac`a`a`^^`]`^]^Z\_]^^^\^[\]\\\]\]^\\\]][]]\\][XXXUVX[^]^]\][Z]\Z^\[\\]]__[[][[_^\]]Z]\\]]\\\]]]]^^]]_\]]][\][^\[\\\]\\]\^^\]\]^^\^^]]^Z][][Y[\^\^YZXYYVYUYZYZYXZZ]^ZWYYVYXVW\ZVWYZ[^_[^^]^^]\^_]\]XXWWZ[ZZ^YZZY\ZVYZWWWWWUVWXXWVXVUVXVVUVVSTQOMLNOQPPQRRRPPPPRRQOQRRQQVTQRRQQQPPQRQRWURSRTRORUVSSTTVROPUTSTQPPQQOTQRRQPOPQQQRSPNPQRRNQQQSQNPOOSRRTTUTQRSQQNQPPSSSOOQUXUWSQOOQQQPPQOQTUTSPQRSWZ\Y^WTSUY^f^XUSQOVQSPONPQQQSPPSWWVXTPTVRPRPSSQPPPQRRRQRQPRRQRRSPOSRPPQRRSSUUUVQPPQUUWVTUWXakhccbgqcglkkovrdfk_VX^__aegfgfggffdcaa``````a_]aa]]^\[\][]^^\]\[\]]]]]^]\\[[]]\]^[_[ZXVVTW[\\]]\^^[][\\a\^`_^_][]][\^]^^\\]^]^]\]]]]]]^]]^_\\]\[\]\^\\\\\]\\]\]]\]]^\^\]^]^_^]^\]Y^^YX[\XY[WZXWXXZWZVW[]\YXX[XZXYXXXXXZ[_]\\]^]\\\]^\Z[ZWVYXYZXZYYZZWYYYYXXXWXXXXWXYVWVWYWYWUVWVVSPMKLLNOPPQRQRRRRRSRRSSSQQSTQMRQPQRQPRVQPSRRRRSOSPRRQPQRRQQSSRRUPPOQQR[VQNQOOPPSRQPOPQQPRPPNRTRQRLPRPQVVURPQRRROOOPTURQOSUTTUPRQPPPQQPRQRUVUTPRRSX\\Y\WTSTY^gaXUSQPURSPPONMONQQPSSUTTQRRQQQUSRQQSORRRSQPRPQPSQRQRQSSQQPRTQQRSRTQRPTSUVUTQQ\`chjgemtwqicehjqtfaab]Z]_\_bcceddhhgbb``baa_``a`^`^]]]][\__\^^\^_]^]]]^]]^^\[]\[_]]\[^[\VXVVZ]\\]^_^\]]\^^_^^^]\]]_^^\\[]]][]]]^]\]]^]]]_]^_`\\]\[\]\^\]\\\]\\]\]]\]]]\]\]]^`^`]]\ZZ[Z\^]ZWXZXY]ZZXZXWYX]\ZZYYZ[ZXW[ZXXV[_\]_[]_]Z]^Y\ZZZXWYXXYZ[\]ZXYWZZ[]WZYVVUWVVWWUVVXXYWVWWUWUTMMJLKMMOPPWZWVYZYZXXTRSRRVUVPSQPPSTUSRRPORSRSTSSRPPORPQPOT\^VTVOOPQQPUUOPQPQNQUTVRRUSROOOPRSUTOPOPPPQSSSROQRRQPOQSQOPOPRRUUSPRPOMQSPQQRTWVSRSSTTZ_\YZWTSTV^h`XUSQRUSSQQPNMONQQPOOVRTNSTRQPQSSRRRRURRRQOQRRSSRRPQQQQRRQRSSQPQQORQRSSUTRUTT^bdihedo{wng]\`ceji]a__\]]^^_abdfhjkifb_`aaa_cb`a__^[]^\\^^^^^]]\_]][^]\\[^_][[[[]][^]\[]ZXWVX[]\\\]]ZZY[^^]^]]\][^]^^\]Z\[^]\][[]\]^^]]^^]``a\\]\[\]\^\^\\\\\]]\\]\]]]\]\]]^`^_\\\Z[\[Z[\ZXZZW[^\Z\[\\Z\[YYZ[ZYYYYYYYXVXZ^^`\[^_][]^\Y\\[XWXWXZ[ZZZZZ[YY[]WXXWTXWVWVWXTWXVWWVVXWVTTRLLKLLKNPMOU\Y]^bhkmeWSRSUYWUVOQPPQTWSSRQOQTTTTSRPRRPRTSSWY_^TSUTQOSRQUQORRMUMQRQTOQTSSQRQORSSQQSOPOPQNWVRQRQRRPPRSOPQPPOQWWTQQOOOQPRRRRUSSPRSTST_`ZWVWUSTT^i`XUSSSTSSRRQONOOQQPPOSQSNRRRONNRRQRRRWTSSRQSPPRSSRPQQOPQSQQQQQQQPPPQQTRSTQTST^_dngcgospgbdb[Y`ksg[\YZ[_]_`acfgglmidb_`bbabc`a_aZ]^]\[[\\\]^_]^^\]]^\\^\\]]]\[[\[[]^][\[Z\UZ\]]\[\[ZVVZ]]^^]]\\Z\_\Z\]Z]]\\]\\^[[^_^^]_^]_``\\][]]^]^]_\\\\\]]\\]\]]]]]]]]^`^^\\\Z[\[Y[[YZ[YX[]]\^Z^ZYYXXYZZXWYZ\\YWXXYZ\^_\[\]\\Z^^]\][XWX[[ZZZYYY\\Z[X[YWUVVWVWXYUVUYXVXWWWVWYVR[XOLLMKNMONVWVXbtyx_SV[\ZXTRTQRQQSSTTVSPPRQQOQRQPQRQRPX^_`[OPRUQNSSRTQRSVTWQRPOUQPTTSQPQRRRSPNQPQPPRQRTSRRSQRPPTROQPPPPPV\XSSRPRQSRTRQTRQPTSTQWhbXUVVTSUTXZWXUSUUTSSSSRPOOOQQQPOPQSORRQONNQQQQSSY[WTQQPSPROSQRPOQSPSRQPSRQPQRQPPQQPQPUTT^a]ehaehkrmhc_]cjvxi]\Y\``_]_`cdcdkkicb````_a`_]^`]\]]\[[^\^^^]]\]^]]]^Z[[]\]^[\[]\\^_]\\\\\]ZX[^^]]\[ZXY\^]\]\Z[]]_]\^]Z^[^Z]]]]\\`^]__^][_`^_]\^_^__`^_]^]\]^]\\]\]\]]]]]\^`^][\\Z[\[Y[[XY[YX[\]\\[\XWWXZYYYZ[Y\^ZXXYY[\[]^\]^]\Z_[]]\_YXX\\\[YZYY[\[ZZWZZYXXVWWWZVVXVYUYXXVWWWVVVbaUNMLLLLOPVUV_fdU\ce_YUSTRQSQSTTRWTPRQPRRRQQPPQPPSX^^]]PQSRQSQSQQORUSTTQSOPSTRUSTOSQOSQSNPSSSPQVTQQRQSQQQQQQQQOQPQPPQUVROOPRRTWSSSTRSOTRTQ_dYUTUUTSSSUWUVUQTTUUTTTSQPPPQQQPOPPRPRRQOONQQPQSRWYUSRQQRPSQRQPORQPQRRRRQSSQRRQPPQQPPRSUV^dc`d^djmumiapruxxwleb_cga]_[`caddgjfdcda``^a```]^[[]\Z[[Z\]]\Z_]^[[\]^\\]\][]]]^\]]]]\[[\\]\ZWZ\^]^[\Z]ZY[]_]\[\[\^^]]\\]][Z\\[[\\^]]]_`^\_^\^]]]^`^]_]\^\]\\^\]]]]]\]^]]]\^`^][\\Z[][Y[[XX[YX[[]\[[[WWWXXXYWZZX\_WYYZWZZ[]^]]`^]\\]Z_]]ZXW[Z\YYYZYZ[[[ZZXXYWXWWWVVWXYUWWXZWVVWWWVTacYQQPMMOQRSSW^\ofY[ba[XURTRQRRUSRRSQRQSQSQTRQOQQSUTW^_[YQQTSRQQPMQPPQUXUSQPPSTTUQQQORPRQPMMPTUPPVVUQPSTORNQQORSOPPQPROQRSTSRSSRTTSSTTSURSTSb^RXSUVVSSSPSTSSPSRSTSTTRRQPQRRRPOOPRQRRQPOOQPPRSQUWTRQPQRQSQQQQOOSQSQRSQSQSQQTRPRRRPQSUSVadcfkikhpoiomv|zww{m``bgh`\\^acdfeegdeccb_]]`a`a]\\]]]^Z\^\]^\^]^][]]^]]^[^[[]\\\^]]][\]\Z\]^YVZ[\\\\\][YY[_\^Y[[[_^_^\\]]]\]\ZZ[\]^_^]^`]_^^]`]\^__]^]]]^^^_Z`^\^^\]\\]^^]\^`_\Z\\Z[][Y[ZWY[YY[Z]\[[[WWXXXXYWYYX\`VY[ZXYZ\][Z]__^]_]^^^[YWZ[Y\Z[[[[]\[[ZZ[YWWXWWWYXWXXWWXXXVWVWXVWT_b^ZVSPOQTXTVWWYayg[XVXWUTRRRRQRUTPQRRSPSWVQTQRPSTTVVUY[WRRSTSRSPPORQNQTXVPOPQQTUTRQPROSURPOOPUSPPUUVVQSTQQOQPSRSURLOPPPQOQRTRRSSRTVTUURQQRSX][TTTUVZUSPSSTQQQRQQRSTQQSRPPQOQQPOPRRRRQPPOQPQSRPTUSRQPRSRSQQQQOOSQQRTTTRRRQRQSPQSRPSTTVU]dgjlmheprntprvzu}l`^aa_]]_`acffbdceebb`^__```^__]_^^][]]ZY[[^b[^Z_]\]\^_]\\_][]]]^\][\Z]\^]]YWX\^]\]\Z[X\\][WYY]]\^^[[^\\\\[\\\_^[__\^\\_^__]]]^_][]]\^^^`]_\\^]\[]X]]^^\Z]^\[Z\]Z[^[Y[ZVZ[ZY[Y]]ZZ[WWYYXXYXYYX\\VYZYWXZ_YZZ_^^\[\\^^]Z[[\\[[[]`_^^[\Z\Y\XVXWWVWXVWYXWVTXVYVUWYXVQTYZ[USROQUWYZXUTUalkkhXTWYZTRSQQRSSUUVURSTSUUUSRPQQTPRRTRSQOPUVURQQOOQRSOQVVTOPQOOTTSQORPPSUSRNNPPROPSTVTRTTSPORRRRTVPONQQQRQPOTQSTQRSTUTSQRTUV\]SVTVWY`^WPTUSQRSRQPRTRPQRSRTQNQRPQQSRPQQRQPQPSTQORSRQPQRTSSRRQQPPSQRQSSSSSRQTRTRSOPQSRRUS[ceknghdmonrgksx{yla``a]]``abdfeceedhebc`c`a^a^^\^`^`^\\ZVVZ\]_]\\_\`\\]^]]]^]]\\[]^]_[]]\_^]^WX]]]^\\]\[\^\\YZ\]\^\]][][^[Y\\]]]^^_^__]]^^^]]]_^^\^^\^^]]^_^_[_Z^[\\Y\\ZZ[^[ZY\]][\\XY\ZV[[ZY[X]^ZZ[WWZYXXZYYXY\YVYZYWXZ^YYZ^]\X[\]^^\ZY[\[\]Z]_^\\[\ZZYZVXXWVWXXWWYVVYWXUVUWYVWWRPSTTRRQQQRWYVTRQSUVY^dYRXUVRSQTPSVSRSSUVTTSUUSRSPQQQRUUVVVQPMSVWRSSOOQSSUYXVRPRQROSPRQPPPQQPVSORSQROPQSSUSVSSPPRQPPPQQPPQQOPOQORPPUQRQQQRRQTTUX]ZTXWWYZ_YUOUUSSRQPQPPSQQQORWZYOQQPRRTPPOPRQPOQRRPOQQQQPQSUTSRRQQPPSRRQRSSTTSQRRSQROOPRPSQRX^ggb^[]ffgkccegioqk_[[^_[]`aacedccdgiffdaabb_b\a\b`___^^XWVY[]^\]^_]\_\[]]\\`Z^_]\^^^^^]\\\\]^XY\]\^\\^\Z[]^\XZ\]_^\\^Z\[\[\]\]]^]^_]__]___]^Z`\^[^]__`^]]^`_\[\Z__^ZZY[X[Z]YZX\]ZZ\[[\\\YZZ\Z[X]`ZZ[WW[YXYZYYXY\XWYZYWX[]YY[^][Y[\\]]ZXYZZ[[[\]]^]\\Y[XYXZXXVWVVWXXYWVXXVVUVWXTWXRPTOPNQQPQPSRQQPSRRSTZ^TUTSSRRRRTUSTUSTSTRRRRSRSTQPPQPUWXVVQSQQRWUUVSPQRSVWTTQPQRQMNPRQOPPQNPVPOQPPPQOPSSTRUQQMPQRPONNOPRQPPPRROQQQSRPPQQSRRRQRX]YSVWWYY]_STSQRQQPPQRPPRSQPSZ\WVTQRVXUQPPSPQPSQQPPOOPRQPRTVUTSRQQQQSRRPQRSUUTQQRSQQOPPQPRQRUYiaVUSVXX_bXTY^[\\j_UWX_c^ab_adcbddgfcddb``c___a__a^_\^[[XUW[[]]]]^^]]^][\^]_\\^^[^]^^^^\]]\^^\YZ_\]\\^[Z[\[ZYY\]^[^]\[^]\[]\[\\]^]]\\]____\^^\^^[]_^_^]^^_]\\][\^[Z[YZZX_V\XY[\Y^^_][\`^[ZZ\]^ZZ]^^[WX\ZXYZZYWY[XWYZYWX[\ZY[^]ZZ\\\\]ZXYZZ[[\^\^^[[ZZ[XVYXYZWYVWUVWXXWVVVXVUXWUVVQPSPNMQPPQQNOPSRPRSTSTTRUQTTPRSTUTTWUUTVUQSSPORSQPPSQQRRTTTTTQSRVSUXTPPQRVWRPRRQQPNPPPORRRPPQRPPPRQPPOQSVTRPOQQOQQROOOPPSQOPRTTPPSQSUTSTRSSSSTRZ\VVY\^[WWXURSSRPRPPSQPPRSPORUY]ZYbmrn]QSUTPSPPQPPQQPPQPTTUYXUSQRRRRTSRPQRSVVTQQRSQPPPQQPRQRV\e^UUSSSTSSVTWchpuvcVV_poi`b_acadcgebcdb]]``^`bb`a^\^\^][ZWWW]\[\]_^[\\]]^]]]\\\\]\\\]_^]]^]^^_ZY[\][^][X\\ZY[[[\\]\][]^\[\]][^\_^\\]^^\]_]\]]^\_]__\_]_]^\\]\]\]^]]\ZZXYZZ^[Z^ZZ`]^^][^]]ZYZ\]\[[^\^VZ^X[\[[YWZZXWYZYWXZ[ZY\^][\]\\[\YYYZZ[[]][]]ZZZ[\[Y[\Z[XXVXUWXWXYWVWXWWXUUWVQPSQOPRSRRQOPQTSTRUXVTSRSTRRQPSRUSYXUWXVVRUSNPRSPPPRQPPORTUUVWWUWVSTSQPTRRUTPTSQOOONOPOPPRORQQOPRSRPPNRRURRPPPORRPNQQRPPSQOPOQSRQSUWUTTRRTSQSWV^\U[ffaZVVXURRSRSRRSRRQRQQPOPPQRV]fqucQTWVRPPSSOOPQQQQPTSTTTRSRQSUTSTURQSRSWWTQQRSQOPPQPQRQSV`a[UUSSSTSSUS]grjgmgXZmuphaa_aa``beebbdbZ[_^^`bbb^^]_]_[Z[WXVY[][]]_[]]]]]\[]^\Z\\^^\\`\]]^\\^`[X[\^^\][[\YYXY[[\_]^]]^^]]_[\Z_\]_\]\]__\]]]_]\^^\^_\^^]\[\]]]\_^_]^]\[YXY]\\[\Z]_Z]]\\_XYYYWZ\YX\^]ZY\]Y[[Z\XYZZWXZZYWYYZZY\^]\]]\[Z\YYYZZ\\]\[\\YZZZ[ZYZ\\\YZYZXXWVWWWVXUXWVVVVUPPRRQSTVTSRQQQTSTSUVXWROTVQSTTRQRRVUVYTWVSTSSRSPQQQRQPPQQSTRRUTRURUQSSPSQVRQSTRPPNPNOQPQSQOQRPPRQSSRQNRTSRQQSQQQPNOPPPPPROQPMQSRPSWVSRSSTRTRW[[aZVX\ZXUTSSSQRRSRPORQQRQQRQPOQROTXf_UUVWVTRQSTRQQQPQQPPVRRPSSQSTUUVVTRRSSSSVVTQRRSQOQQPPQRQSV\]YTUTTTTSSTS]dlfejf[frxulc`_`_b``defcc`^Z]\`aa__`^\]__[ZZWWWY[[[[\^[_^^\[\\\[\\\]\]]]`\`^\\_]a[VWWZ]]\\[[ZYYZ[]]\[_^]\]\]\\\[^[]\^^\^`^^\]]]_^\]]]]^]`^][^^_]`]^`^\][[\]^\\\]\\_\\]\\ZZWXVXVYXXWY^[XZ]\[\[\YYXYYXW\VZUWYZ[Y]^]]^^\[Y[YYYZZ\\][Z[[YYYZ[ZYY\\[YYXYXXYZWWVWWUWVXYVVWPPRTTTUYVTSRRRTTUTVWXVRORTUVVVVSRQQSVXVTSSTSQSQQPQRQPQRSRQPPQRSQPPSUSSRQSWVTSSQQPRPPPQQRQOOPRQRQPTSUXRRONPTQRPORRPPOOQTURQRPOPPPRQTTPQRUTSSTV[abTRUQVSSRQRSPRRQQOQPOQSPOSOQQPPQRU_XTSVUWUSQSSPPQPQSRQSWWRSTTSUSQRUUSRRRTTUSTURQRRQOQQPPRRQTWXYVTUTTTTSSTS]afbdhf_jptqib_^^``_acegeb```]\a^_``_^^]^]Y[\YXXY^ZXY[]Z^\\]\]^]\]\[[\[\_^]```[_]]]YVYVZ\Z]_\ZXY[[[[]]_`\]^^\^]]]]`_\]^\_`]`]\[^\_][]_`]\]^^^_^]_`^_]Z^X\]^]__^]]^]^_\]_[ZWWVYYXXYWXWZZX\ZZ]^]\]ZVXXYXYXYUWYXYX[]^]`_][Y[ZYYZZ\\\[ZZZXYYZZYZX\\ZYYXYXXYZWWVWWUTZXUWWWOQOVVSW\YVTTSSTUUUVWXVRPQSSVVUTRQQQTYXVWSVTSTQRSNQQRPORTQOOPRRRRPORSTSRPQVTTUVRQQUROQTRTTNMOQSQOPQQV_XUNPOVPSPOOSRQOQQPQQQQQPPPORTTRQRRTTTURV_idWTTTUVTSRQQQRSOQNPRPQRPOQPPQOPRPPXWRSWUUTSSSQRSQOPSSSWXVXUVSUTSQQQTRSRRSTSTTTSQRRQOQPRQQQSTUVUTTUUUTTSSSSW[`^cffbnnpmfa_^^__^`cdfeb`aaa^b\b]b_^`_\\]\\YYZ\^YWZZZ\\\^]\]\[\[][\\^\[^_]^][]^]]ZXUWW\[_][YXYZ[\]]^^^\^[^\][^[Z]_^^\^\^_]`\\]^^\[^`_\\_^]^^\\^_]]\[\]]]\`\][]]^`^\^]\YWYUXXYWUYZ[WYZYZ][\]]]\YXWXYWXYXWXWZYW\Z\]]]\ZYYZZZ[[]]\ZYYYWXYYZYZW\\YYYXYXXYZWXWWWUTYWUWVVQOPRSSX\ZWTTUTTVVVWWXVRPPQSVVTSQQQQSWVUVRRRQRPPSPRPSQQPPPPQRRRRTRRTRQRRRQQSUUSPPSYQQSTPRPQNOPSPQQPR[c\SOOSSPURTVTRPNRQPQSQOPOMOQTTSRRRRSWXXUcd`\YUXWXYSSRRQTPRNQQQPPRQPRROQQPPORPTXUTYVTTUWVQRSRRQSUWTTUYYZWXVTRRQTRVUUSSTTRPQSSPORROSOQQQSQTRUX\ZTTTTTSSQUZZbdffllmid`_^^__^_cdgfdbcba`^`]aba^_]^^\Z\ZWWWYYW\ZY\\^[^\]Z]ZY][Z[]]]^]\]][\^]\[XVUYXZ_[ZVYYXZ[]]]^]^^\[]\[]\\_]^\]^\^\]^]\\^[X\^^\\]^]^^][[]^\^\\_^]_]_Z\^]^]^`^]\YXXXVWVVVUUZ[YYW\Z\]\\\[[\ZWYYXVXZZYYW[ZY^][\]`]ZYXWXYXY[YYYYYWXYYYXZV\[YYXXYXXYZWYXXWUUYWVWVVMORQPSUVVTTSRRTVUSTWXVRQOPSVVSQPQQQSUTUURRQQRPPRRSVSROPNPQQUSQSSQPQQPPRRUTRTRPQQNSVQTQOMPOPQNRRNPRU]aZSRTRRQTQPPQPQMTQPPQQPPQOOQRRQSRPQUX``c^[]VXVVUVUSTURTRRPPQNPPPQPQPPQQRRQRTRUZXVUUUUTTXRUPTURVSRRRTY]ZXZWUSTRQRTVWRTQSRQQTSQQRROPPRPSRPTSSV[XVUUSTUSRSTWabfjjjiea__^_^^^_cehhfdecb`^_\``_]\_]b_^^[YYYYXY][Y]ZX]_[]^\[]^\Y[\[\]]^^^]\]]]]YUXWWXYWWWYYY[\\Z]^^]^^]\\\][Z^]]\]]_]^]]]][][[Z]]\\]]\]]^^]]\\]`^\_]`]`]\[_^^^]][YXWYXXWUVVWXWXXYWYZ]\[]][[\XYXXYXX[[YZY^]\[^Y\Z^^YXYWYYXXXVVWWYZZWXYX[V]ZYYXXYXXYZWYYXWVUXWWXVVNNSPQQQRVXWTSTUSQQQSWSTTSQRWVSPPQQQSSRUTRQQQRQQRRRURRPQPOPQUPOOQPOQQOQSSRTTSSSSSOQUTSQOPLQPNPRTRPUSYZVSSRQRRQNPOPRONTSSQQRPRSQPPPQPQRRRV_hdWWY\VWWWSUUSTTURSQQQQRQMRPQQOOTSVWSRUUVXUTVTTURSUVUSUTSTUSQRV\^ZZZWSQTPTTRTSPPTQRSQRQPSQQQPQTTTURUVVUVYVVVTSVTXYVXZ\hqgifb_^___^^^^cfiiifgdc`^^\__^\\^]`^]]]^[[ZXY\[[\ZZ^][]\^\_^Z\Y\\^]]]_\]\]^\_^XXXWXZUXTVYZ[\[\^_]\^_[]\[[\]_]]\]^^\^^^^]^YZ]]]\\][Z\\[\]]]^]^^^^^^^_^]\^_]]]]\[YXWZXYWUWVWXXY[YXY[\]^][[YW[[YXXUWYZ[\YZZ[[]YZZ\WYWZXYZYYYWXYXXYXVXXXZZYXWYXXYXXYZWZZXWVVXWWXVVPPQQQPRV^`gf[TSTSQQRRRRTQRQWYTQOPORSQPUSRQPQRQQRRRTQSRRQPPQTPPPQLQPPSQTSUTTSRTUTQPSWTTRPOQTPTRVPQSTTUSQQRPPQPOOQPOOQTSQSQSNRRSPPQQPQTRY]]]YTTUXVUUVXWTUUTSRSPQQQRPQOQQPONXWY[VTXTVUQQQRRRRQRSSSTSRRQRRSZZ_\]\VQRTSTSUQQSSSRQQQRSQPRQRRRQRTUTWVSTSVUVTWTTTX]\mpmrsmged_\b``^^^^dgjkkhiec`^^\^^\\]^]_]\\\][[ZXY[ZZYY\]]\[]]\]^[^YYY\^\]`][[]]^^^^^YW\\[YVYXYZYZ]_\]\\^[\\\\[]^^_]^_]]]]^[\]]\[\\\ZZY]_]]]^_]]_]^`_^^^^^[\^]\]^][[YYWZYXVVWWWXYYYYYY[\]_\[YZW\ZZZYVXXX[ZZZXYY[ZZX[YYXYY\WXYYWYWWYYZYYZYZYYZ[\[YZ[XXZW[[YXWVWWXXVWOPONROQSXbwzaTTSTSTTQPRQPRTUUTPPOORSORUURQPQRRRQQQSPSSSRQPQTQQQQMPPPRQRSTORQY__ZVUWWUTRPNQRQRQTQURTPQSQOQQOQNPPPPPQQSRSRRROSVQPQRQPOOY[VSRTTRTVUUUXUWTWWVTPSSQSRPSPSRRPOPRTUY^][VXTRSQQRPQPQRTTUSRSQUPX\[^]^WTRUSPSSRQRSPORPPSQQRQRQSSRRPPRUVTSTWUTTSUUVSSZ]lvqyuldba__``_]``b`dlmnkkfc`^]\]]\]]^]]\\\\]\[ZYZ[ZZXX[\]]\\]\]^\^[Y[^^\]]][Y\]]\^]^ZY\[[]WVWXY[[_]]][[\\_Y[]]]\__^^^^_^\[[]]Z^[]\^Z^\\_]^^^^]__^__^]_^_^\^_^]^]\]Z[\ZZ[[TXWWWWVXYZ\]^`^\\[[[[ZW[ZXYWXYYZZZYXZ[ZZZXXZZZ[ZYZ]ZX[YZYX[ZZZYY\\\][][ZZXY[XXY[YYWWWYYVWNPNPQQRU_hz{eTZ]ZVSQORTRQSTRRRQPOPQNSQURPRQORQRPQQRPTUTSRPQSRRQQOPPQQRRRSOQRY_feleZWSQPQQOQQQSTTSQSQQSQQQPRRMPPRPQQSTQRRQQPQRRRVQPONSRROORRSRTVSTZ[WVZ^ZVTRTTRTSWRRQQSOMQPQQUbd[YWURPPRRPPPRSRTUSTSPUSZ]]ed\WTSURSTSQRRRRROQUVWUQUUUSSVTRPRTTRVXXXVUUWZZ[VZ_hrltufZcd`^]^^_aab_dlkeikfb`_]\]\]^^^]\[[\\]\\ZZ[[ZZXXZ[[[Z[\[\\]\\ZX]]\_`Z_[^^]]]_]\YY[\ZVUWVX\YZ\]]]\\Z]Z\ZY\]]]]^]]^\\\Z\^^[\[[_\^_]_]\]^^^]_]^_``___]\Y^]\\^]Z]\\[YY\XYXW[YZZ[\\[^]\\[YX]ZYXYXYUZYVYXZZ[Z[\\[XYYY[Z[[Z^[[Z\ZZZ\Z[][`]^^^_^\Z[[Z[ZXZZZYXWVZX\YXPPOPOQT]tvtl\USVUQOOPRPRPQQOQWYVRPPQQUQOPQOMSSSRRQSQRRRTSQQSSRQQPPPQRRSRROQTZ_``faXUSQRPPQQRRUURSOQRRSPRPRPQQQRTRRSSTSPPQPQRSRSTONNORPNNMPOQSWSVVdj__on]TRSTTTTTSRPSSQOPRNPTRZZUTWYTQQRTROQUTVVZ[YYTTRTW[^]WTVRTRSQTSUSRRPRWY]aZ[_Y\VV[USPVTUTTVWXZ[\`d^YYZ^f_afoaVfab^___^_``acegdegc``_\_\[Z__^^[[[\\]]\Z[[[ZZXXZZYZY[[[[\\[\YY\\\]^[]]^[]]`\^\[YZZ[ZXWWYZZ\]]]][]\\X[X[\]^\\\\Z\\]\Y\]\\[\[]\\]\_][]]]]^^^]__`^\^][]]`\]_[\\\[[YZZUZWYWY[[[[[Z\\[ZYZYZYVVYWW[XYWZY^][[\Z[YZZZ[^__cdc^[ZZ[ZY]Z\_^fusebceimnja[\[[[XXZXZWV[ZYPOPOOQS`syqcXTSTQRQPORPPORRPPTZWQQQQPPSRRNSORRRQRPQRRRSTTQPQPQQQRPPRRRRRQOPUY\[\a]VSRQQPPQRSTRQPTSPSUTPQOQQOSPQSRTTQTPQRQPPRTTSQOMPOOMONMNQQRVUbasmZRRTTTUSTRRRRQQSQOPRSTTSTUTRRRQQPOQPR[Y^b^\TQQQRUWXURTPRPQPSSUTSRSU\]]bdc`e`\^`VRRVTTUWVXWZYXYXYYYZYZ\_bjdVeca_`___`^caadd`cea]\\\]\XZ^]]\\\]]\]^][[[[ZZXXYXXXXZZZ[[[[\YZ[[[\][\\[Z\`[_]]^ZX[[ZXUWZZXZ\[[[Z\Z[YYYZ[][]\\[\\\\\Z]\[]\\\\]]\^[^[]^]]^^_]__^_\]\[^^^_^][]\][\\[[Y]VYY\ZZ\[][\Z[Y[[\\XUWYXYWZXZZ[_[`X\YZW[[[`ejjffhiga_____\^abpojoxxwxvj__`^\\[ZYYZWZYZPNQOOOPa|zsbUSSPRQQPQPQORROOTVTPQRQORWSPQPRQQQQROTORPSQQPOPPOQPPRQRRSRRPPPSVVVX\YTSRQPPQRSSSQQQSRPRUTQPPPQPPSVUTWQPVTORPPNQRQRRRPNMLMMMMNQRSX[jy»Á²©aQPRTTUSQTSSSRSTRPNRTUSRRVQPQQQPPQQQSW\_b__UQRRPRSRRRSPPRRPRRRSQSQS]abgigdc`^abWSSVUSTTUXXWVWVUWXW\a^[\bjfX_bb_]^a`Z_b^^bb`dc][ZZ\[XZ\Z^\_\]\^Z]]_^[[\[[XXWVVWWZYZZZZ[\YZZ[[[][\[ZZ\_[^\[[^W]X[VVV[ZZ[ZZ[[[Z[\YYZYZ[^^]Z\\\]]^\\]_^\Z[[\][]\]\^\`]^]_]\\^]\][]\]^^\[][[\][^Z\Z[YYZ]Z][]\Y[ZY\[\ZYVXYYXX[XZ]YY[XXZ[[][]_dinou|xvvokmkigddeixuvwxsotwnjgggedba`][ZYYWQPRQOORj|hWQRTRPQPQMQQOPPPQTPPPPOQRSRQRRQRQRSSPQPQOQQQPPPPNPRQPSRQRSORPPSSPQTWUTSSQOPRSSRRQQRSRPRTSQPPPPPRSTVSWPRQQQPNPPQPPQSRNLMLMNNMNSWZ_cz®ÒØ¾´©_TURSRSSQQRQSRUVUPOQUSQQRVQPRQRPQPPRRU[YYa^XSQTQRRPTTRQQQSPTQQSSQSOZbfhgdhicaeaVTSVWUUWQXXXVWVUWWX[b`\_eoi[bca_]ac^^`]___a_`^]\ZXWX\^[Z[]^][\^]_[_]Z[[[][WTTUVVZYYYYY[\YYZ[Z[\[\[ZZ\^[]\[[]W\YZVTSYVVZY[\[\]ZZZYY[]^[]][\][]]][[^_[][[[\Z[]]\\^]]]]\][^^_^]_[][]^][Z\\[\\[\[YZYYZZ\\[[\Y[YZ[ZZZ[YWYZYYWZ\Z[ZYZZ\Z`cickkpvut}~rmnmtxwyy}wnoqyzxuqnljhggc_[\YXOQSQOQSgvxqhZQQSUSPPQPQRROPOQPONQPONPRTSSTRQSTSTTPQSSRPSNSPQQPPOPRRRQRRRQQQRROQQQSSTTQOQSRRQQPQSSQPRSRQQPPPPQRTUSRQQOOQOSUQQPPYVNMLLLLNNMQX[dpx´×éßÆ«¡vXRTRQQRRRQRRQRTTSPMORRRPQUSPRRQQSSSTRQV[Y[^ZSSRRSSOTSVOTRRPRTPROOPQW\`gelikfecZTTTWXTWVVVXWTUSXTWXUUUZ]exn[beb__bcb^`^`b^cb`^]]Z[ZY\_\[[[^[Y\]]`[^\W]X[\[XUTUUUXWVYYY[\YYZ[ZZ\[[[ZZ\]\\\\[\W\ZYVTSXUVYXYZ[ZXZ[ZZ[\\\]]]]\^^^^\Z[^^\Y[]\\Z\]\\\\\\]]\]^^^`]`^Y]Z^^]\[[[[^[[ZZZYZXZY]Z[Z[Z]Z[YZZYZXXYYXXWYYXZ]__`cgkr{}{~|xtk_[^hrw}~rst~|~ypieec^[ZPRRPPSWbj_YUPPQPQPOOPQTPSPNNPQPPRPNPPQURQRRPQSRSSSSVUQRRRTTTQPOPRPQQQRRQPRSQQSRQRSPSUROOPOQQQPRTRQPQRQQQPPPPQRTTSRQPOORRUXSSOVZTONMKNONNORWXav¡ÄìõâÒ®bWPSTQRQPRTRRSTRRQPPPQSQRSQUQPRRSQSXXSPU[Y[]YRQRRRSQTTPRQSPRRTSTPQPQTVXWajkmeef^VTUVWTSTSVWTYVWRWTXTVXXZbuo]^ca`abaac``_`_cfb`__XZYZ\^\[]^]\\]]^^\\^Y[YWY\[UUUXXVVWWWYZZZ][[ZZ\\[[ZZ\\\\\\[[X[ZXVTTWUWXWXZZYXZZ[\Z[\]^^]]\\]_a\Z]\][Z\\Z]\[^][\^\\]]\]]]^]^_\[][^^\]]Z\\\[YXZZZZZZY\\[ZZ[\[YZZWY[VYY[Z[Y[\]`bglpnnvyairZZY^`_]ZYns~{~{skgc`^RSQRQRXhdYRQPROOQQPPOORSQPOOPNPQTTNPQPPQQNPQQSSSRSVWTRRRUUTROOQRORPPPQQTTRRQQQSTSRPRSQRNPORNRRQQPQPPQQRQPPPPPRSSSRQPOPSVXWSSPWXSPMLLOONNQRWY_¨ÈäÛ¸¯vWRPQVRRQRTPSQSVSRQOOSTRQOQRUSRRPRQVVXTSQVYZXURQSSSRRSRRQQQQPTRSROSRRUUVV]djlklj_TUUUVRRUUZ\ZYSVUUX[Y[[\`amsb^b```aaac```]`cccab_\\^Y\]\[\]]]\\\]\\]_]Y[XZXYVUTWWWY[Z[\]\[]\[]\^\\[Z[]\]]]\[ZX[YWVTTVUWWWWZZYXZZ[[ZZ[\]^]\]___^[[][^]\\[]^[]\_]^]_\^][\^_^]]^]][Y^]\[\^\Y^XYX\ZYZ[ZZ[YYZ[Z[\Y[Y[W[XW[YZ[\``egpxwwtu}qjnlromg[Zjqge_W^_X]XXWVfcZ\_b`crxzrkfdQORTSSXaZRQSPRPORPPQPQRRQQQOMOQRRPOSNOPQRQPRORQSQTUSUUQQRSSPPPRQPPQROQRSTPPRQOQRQRRSTRRPOPPMQSPPPQPQRPOOPPQPPRRRSRQPOQTY\WTTRXVSPMMLOOOPRPW]f ¢¹É³q\TSQUVTRQRRSUQNURQOQORTRPQQQQRTTQQURSVVURSWXTSUQPRPQSSRQQQQPQTSRRQROTTTWY\agjgkeYSSSVXWTUU\]ZWSVXX[\[Z[egal|b^agd_`bcba^^_a_cfded^]_]]^^\\\]]\]_^^]\]\[ZZ\WUWUSTUTY][[[\[\]^^[\]^]\\[\_[_^\[ZY[XVVTUUUVVVWZYXYZZ[[ZZ[\]^]\]^_^]]]\]]][]]]Y[``_]_\\\\[\^\\__]]^]\\_\[ZY]\^[[[Y[ZZYZ[[ZYZ\[ZZYZ[[ZWYYXXYZ\abgu|~yurk]WTTRUVSUTTWZZVUTVYU[XWTYj}xvy|{rmg^YWX\ZY\Y]cr|}yqmPNSSUSSSSRSYUVRURPQQSSRQQQQPOOPPPONRRQRORNORPPPRUYSVVUSSSSSQSTVQPSQSSSQRRPORRMPRPQRSRQQOPPPOQTPQQORRSQOPQPPQQXWQSSQPORU]\VTUTVTSPNNMOPPQRPV]b ¬sdZSTRRTVUSQPQOTRQTSSNPPRQPPQQPPRSTVWTRRTWSSTTTQQSQSRSTTSSRRTSSSSSRRQPTSTVUZcfihakcVTWWYYWXYYWYXUTVZ[\^^`[^a\fra[fmiabccb`]`ddeehhjga\a^\]^]_\^]]^^]\^]\[[XWWWUUVUVTVUW[\VW\\\]^]\]_]]_[\]\^]\[YZ[YUVTVUUUUUWZYXYZZ[[ZZ[\]^]\]^_^]]]\]\\[[\]\\\^][]]]^^[]^]]]^]\^]]^^\ZYZZ[]Z\YYZZX[Z\\Z[YZ[[ZYZ[ZYYYYXZYYcjl|rhd[TTSRRSWUSSTTTVXTTTWWX\^YXZk|xrxzx{{gXWWYYXWVXX\]gs}QPOORQSSSVY[YXVSTSVUUPRQQPQOQRPOQQNPRQONOSOPRPPSUURSVTSSTTRSTTTRPPQRTVRUQPOOQQPSRRPQQOPQOPQQSXURPQUQSQQQPOPQTZVPTRQRQPVa]VUVVTRSPNONOPQRRQV^^y{mbZRTUSSSSTRSRRTVQTQQNOPUSPQOURPQPQUZZWTSSRRPRSQSSRTSVTTSTSRVTUTRSSRQSVUVUWWfdiihg^XZWVXYXWXXXZXXZ[ZYgd`c`]aceic[ajjbccedc`cecfhilojc__a]]^__a_[_]\]]]^[[[YVWXWUWWVTVUU\[[X[\\^\\`^]]]]^]^][]_\[Y[ZVWTUUUSTUXZYXYZZ[[ZZ[\]^]\]^_^]]]\]\\[\\]\\]\ZYZ]]_\\]\][_^]_]_^^][[[ZZ[[ZZYYZZ]\[X[YZ[Y][ZXXXXXYZZY\aem}~l]UTTTSVUTUXVRVVUV[\ZYXUYZ]__YYmiYYXWUUUUTVZVX\pMQMORRPSSSVVTTUQQTSQSUURPPPRRQOPQQQRSQNPRPRRQPQSTURSQSTVVTPSSRTSTSQQRSRQTPONQQRPQRQSMPNPOORRSVSPPQTRTQQQPQOWRZRPQRQRRRZ_YTSSTQPSQOPOPQRRRRVZ[py{~eg`XRTUTTTTTTSSSVSQTQRNPPURSQPRRPOPQSYWUYVTTTTQQRUSPSRTSVQQUVURUTRRTRRTTTUWWZ]`_ai^[Z_\YXYYZY[_]Z]_][[]`bc`\flajrdegngcabdbaccchjegkkd`a_`______]_]^Z_^]Z\[ZWWZZWWYWUWUW[\ZYY^\[]_^]]]^^^]]]\^]_]ZZZZVVVTVSUSYY[[ZZZ\[ZZ[\]^^\]^_^]\]\\\\\\\]\\][Z\]\\\[[[[]]^_^^^^\_^[Y[ZZ[[[ZZYZ\]Y[Y\Y\Y]YZZXX[YXYZ[_iow}xj\XUTQURVVTTWUUTWVTW[ZZ[WVXY[]\[Yqxu{cWVXXWWTRUVTUUTXaNQMPOPNSTRVXRRRQOPOPPQTQQRPSPOSQQOQRQSRUWVSSRORSSSSOSTQYYTRTSPSTTSQQQRRSQROQTONQQPRQQPPQQORRSTQQRRSSSQTSRQRNQSPPSQRSQ]`XRTVSRROSQPRQPRSRRSV[`fmnmm_a_WSTVUWUUUTSSSVSRRSQOPRTRSOSRQQOPQRRRSWXXWTUSOQSRPTRQSTORRTSPTSSTSRRTTUZYX[X\\Z``acfa[^]\][Y`b]_a_`bdcdab^_bfrwsoltuc`db^d`degababfd]`c`___^]^\^]]]^_\\[Y[VW[\ZZ[ZYXVWXV[VY[[\]]^^\_^]\[\]]_]Z]]ZZ\YXVWUUVWW[Y[YXY[Z[\[\]^_]]\\\\\\\\\\\\\]\\\^[[Z\]]\[[[]]]^]^`Z^\^ZX[[Z[[YZZYZZZ[YZ\YWZWXXZWYVYYY[agp{{h\YVVSUTSTVUUVVVXTWUTWYVUVUVYXWZ[W]r~zvwcUSVWVWTTXXSSUUVUONOPOOOQSTWTUQUSQQRSPPRRSTROQRSRSNPQRPWVUQPPQPRUWURRSTQUVSXVTRRRVORPQRRPPRQQPNNSPOOQQPQQSQRQVXSRSSTTSQRTSTPRPPRPTRORWbUVTVTSRSPPQPRSSSTVTRQQT]bb\XY[]XSTWWYVVVTSSTVSRRSQOPQQRPQPRORORQTTRRRUX[_]VSQQTSTRRTSQUSSTSQQTVSQRSTVb]UXX\`\ecadid`fba^\^cgaceiqogefddc_acmqsnrwzh`eadadcfbb^^`bca_a_^_]^`][\\Z\][\^[[[XWX\[Z]\][XWVUXVWX[\_]^^]_][]]]^]^^]\\ZZYYWVUUUWTX[XZXXYW[Y\[\^^]]]^_^]\]]\\\\\\]\\\^[\Z[\]\[[[]]]]]^_Z][]ZZ[^\Z[ZZZZZZ\[YZ[XZZ[YXYZYVYYY^dq~vfb]VSTWXWVUTQVWWUVTV[XY\^^][[]Z\`^Z`w}yx|`VVTUTVTXVUSSVUTUPPQPOQPQQPQTSTUSQPQURQQRUWRQTSPSQPPPRRTUVTNQQSUUTURRRQRSTSSWSRSRORRPRRROQQRQPPQROPNSQLPUSPRRT\WVTUURQQQQRRQPQPRRURSUaYPUPUUSTRQQRRRUVRSXRSSRQWTTTSSV\YTTXY[WWVTSSTVSSSTRPPQQQOPPQOQQQSWTQSQQR]`baWRRTWVRSTSVWVRRSQRURQOQRSVWYTTUVYZZ^_]fiea`^_]bntoehkrpjffjhfjlihqqhmqsm]cbec`ab`__\^bcaca`a`^\^]]][Y^\]\^Y[Z\ZVY[[\\\_\ZWVUUWWZ\]^\^]_\Y\\\]^]\Z[YYZYWUSTTTWWW[\YYZWWXW[\\^[]]]^_^\^][[[\]]\]]\\^Z]Z[\\\[[\]]\]]^^[][\ZZZ\ZZZYYZXYZ[Z[ZYZYXXXVWYXWYY\cnpdd_YVUUWWUTUTUVUZWVYYYWXWZUWXY]Z]_^^blpmkjljnpne]VXWUUUUURTWWTSTPQOPPQSRQNPSTWUQPQPRSTRRQSQRRQQQPNPRRRRQSOQRQTSUQUSRSTUTVSQUPQRSOOSSUUQROQRRQPQSPPPQRQQRUQRSQWUUUQSRSROOQPORRRSSTVZd[TTRQVUTTQRSTRTUTSTTUUUTRQSTRRRT__XW`f]YXVTSTUVSSSTRQPQQQOOPQOPPQSVSPRRRS\]Za]WUSSSRRSSWWSQSRSSRRRROQRUUWWVUSST[^Z[cib`a]__clmhbfdghdeloimonmkpsickmiccac_d^__]_`]_deea_`^\^\^^\[ZZ]^\\YZ][[[XZY^[^\\]]][XXWW[\\^\\]\ZX\ZZ^\]\ZZYXWXZVUVWWWWXZ]\ZZYXVZ\\^^^]]^___^[]][^^^]^^\\^Z^[[[[\[\\]]\\]^]\\[[ZZZ[YZZYYYWXYZYZYXXVWWWVWXYZY`etl_[[W]]USTSTTUUSUY\\\WTSSUUYUWZVYVVUXYZZXW[\[]][]e[VWXTVSUQTUWVVTXPOORTVURPNQWUYTPNPOUPWSSOSQRPOQQPPPQQRTRQQPQQQQSSTUTUUTPQTRQPQRQPPSUUTPOPPQOQTQQRPRSSRQRTSQRRTURUQURQRNPQRPUSRWXY^d]VWTUTXURTRRUVUVUSSTVWWUSRRRRORQS[^WYde`]_WSUWVWTSTUSRPQRQOOQQPPPQTURPRQSV\[X^]]WYTRSRQRQRRQRRSSSTPRPRTVSUWTVRRUV__\`dc__`^\^fagghfZ\[_fnk{~uuursh`dkqjbbbbbb`a\bb\befd`^]`_^^\\]\][\]]ZZ[\\^]YYY\[Z\]\^^_][YYXXZ\]\[\]]]\Y_[\YYZXZVYWXYXXVUVYZ\]\]^[XXZZ\^\_]^]___]^_^_]^^]]][[[]Z[\[][^]^\[[]]\]\ZZZZYZYZZYYYVWYZYZXWWVVVWWXYZZ^islbZWQX\YWTTRTWTTWWYWVVVTSUUUWVVXVZWRVUUVTTWXXYZXWWZWUWVRVURRRVUTVXZPPPPSTTROPSVVTSRPQSRQWUUQPPPROOQQOQTPQSQQUUSQSTSPRSUQTSQPSQQQROQROQRQORROPPNPQPRSRSRQRRRRQPTXTRRTSQQTPNPPOUU\_`abZVUUVSSUVXRRSSTWWVTRSVWVUTRRQONORSSRRW_deoe\UTWYYWTSTTUSQQSQOPQQPOPQSTQPQQUZ\ZW\[[WXTQRPOTTSPRRSSTSSSSWURTSRTUTUSTT[_eicZY[YXWY_jtumo]_]beokuyq{zxrkhlqphbcccdaa``fb_`d`dca_^aa\\]]\[\]\[[YZZ[][\^]\Y]\]^\^^\\[ZZ[]_]\\]]^][[]\Y\]YX]Y[[UZYZWXXXZ\][\\^YZX\\__]]]^_`]]^^^^^]\\\[\\\\Z][\\[^\^][[]\[^\ZYZZYYYZYXYXVWXYXYXVVVVVWWWX\^cixr^ZVUTVWVQTUTYVUY\WVUUVUUVUUSSSTUVWTUSVTVTXXYUXWVVUVUTUVSTRTPTQUQVYcQRQPPQPQPPRPRRQRRQPUUVWSVPPRQPPOSPUXRQQRSRUTRTQRRRRUOTVSRTSTQOPQRNRPPPUVQNOPOQPRSVTUSTSQSRRUVURRSRSRSSQRPU[cZ[ZRWUROQSSTTTRQQRSVXWXSUUVVTSSSQQRPPQSRRTW[_il\XXXabYWTSTSRTTRTTORRQQOPRRSPPQQVZ\YVZYZXXTQRPQUVTSTRSTTSRTTUSSTSSSSRURRUV`daZVVWUVU\^dmpspb^gipje\`epqxqrnpukdbabccbceddcb`_bfc`^`]_\^]^_\\]\[ZX[[Z\Y][[^\[\\^]_\^]]]__[]][\^\\\[[[\[[YZY\XYXYYZ[YWZXY[[\\\]\ZX[\_a]^^\_]b\_^_^]]\\\]^\Z[Z\[^\Z]\]]Y]][\^[ZXZ[YXYZYXYXUVXYXYWVUVVVWWWX^bhjy~m]YXWXYWVVUVTTV]\[SVWVVXSTWVVTTUTUVWVVTVWXWWVVXZWVUTRTUVWTRSTRRTSU_\QSTQPQOPNNORRRPPPRSVWVWUTPRSQPUTTVWYUQPRQSSRSUTRSSQQOQSVRTTQPQPQQNRORPTUROPOMPRRQRTRVRRPSTSUYUPPRQRTRSSTS[fTTRQQSQRPPTTQQPOQSSVYVTZWXUUWUQQSRORQQRSTTUVUV\YWV_rocZSTQTQSTVUTUQPROQQQRTSOPQRXZ\XUXYYXWTQRPSVXVVVSSSWWUUTSRTSRTSSUTSUTWXXVTUUVUVV]_hlsyqjihlstre[][ar{whkphbbcdcbghedcdc_aed`_`]`^\_[\]]\]]ZYZ[[\]Z[]^][]^[][Z]\\^_a[\][[\]\][Z[\^[[[ZYXVUWSWXYX\Y\[ZZ]\\\\ZYZY[^^^_]\aa^_[]^\\]\[]][\[Z\Z[[[Z[[]ZZ]X\]]Y[Y\ZYZZYXYXUVWXWXWUUVVVWWVY`fmkzuvwi\YXWXYWWUTTTX^WUTSUSUTRRTWVVSRTTUUVUUTWWXWUVX[YUUVRTTVYYUSSSTTTUTXXPORPPPRORNSOPQQNOPRUWXWSQRRRRTYYWUUXWSOSUSTSTUUTSRQOOPPQRRUOQOQMRRSRTPQUPPQONMNQTSSTRRQQQWTZ\]USRQSRQSSTYcZVRSQURRPPSSVSSTSTTUVTRTWUXSSRTRRQQORPSSUUXZVSRTTUZi|m]^RRSRRQVVSRTRRQPOQRQSRPQQQV\\WTVYXWWTQRQUXZXYXSTSZ[XVTSSTSSUTSSTQQTUVVTVWTUWS[a`bkwxsqgbiwzsmfk^Zv|lpykbccdbbehffedb^_a_^_\b]]^^Z\[]\^^][[XXZ[]]\^[]\^\[]]\_\^^\\]\Z^^[\][Z[[Z\\YZZYWXVVSVVVVVXYZXYX[\][\][[]]\^^^^`^][]]\Z][[[][[\][XZ]]^[\Z[[_]\[YZZZZ\YYXYYXWVWWXWXWUUVVVWVV[bjrlulmne[YWWXYWYUTTTW\VTSRRTXSUSWVTUTSTUVWVUVWVVWXWWVWTTTVVVTVYXZYXTSUUUVUWROPQQRSQRPMONOPOQPRWWVVTSRQSUVUVRQOQUVUTRTRSRSSRSSRPOPRQQRRRRRNQRRTNQQSROPPQPPORWRPTTSRPRTUZ`[TSURSSRTVZ^\XVQSRTTSQQVPSTTTUTSSTUWURRTUTUYVWVSPRQSUVW_cWRRQTUZmvg]YRTQRSQRTPTQSRQPQQRRRPQTRPQPRQUYZXWWTQRRXZ\Z\ZTSV]`[WUTTTTUVUUTTQQSTTUUPTRTUT[^^ckkck|s^\ad_cmj\cy|zxovrgcbbdaegjfb_]\^`____\]^_\\]][]_]\]\[Z[[\]]]]]]]\][]_\^^_][[\[[][\\XY\ZZ[ZZZZYYYYVUWXSZTXVYWXV[Y\]]\[[[\]_]]\]]\_]Z\[[\][\Y][[[][Z\\\\Y\\[\[ZYZZXYYWXXYZXWXWWXVWXVWWVVWVV]dnwmjcde`ZXWWXYWZUTTTWZVTSRSTWSTSTVUXURUUUVVTUVTVYYVZWWVTTUTXTRVWW\UTSSUVUWYQQONQSQOOOPOQOPRPNUUWXXVWWQSTRRRONQQQTTRPRRQPQSRRQPQQOPRPRSTRQOPQRPOQNOROPRSRVRRWSRRQSRQRRRY[TOQQQQSV[ae_WTPQSTTQTSRTNUSURRVTQSSUUSSRRRPSX\[VRPQUXVYbk]SQPS\cklaZWSRPRSQTSRSQRSRNQUSRSQQQPPQNPQWb`YURRRSW^b^\_\USY`d^XUTTTTVXWVUTRQSTTUWSWVXWWWblnlh^dptaXXZYZ^egfnvtwuwxshcacejlke^^^^bb``_]]]^]\^]^Y\]^\Z\Y]\[]]^^]\]]\\^^^^_]_[Z[]Z[^[Z[[\Y[[[[[YZXXYXWWWWWWZVWWWUWVWY]\\\][[]^`_^^\\][\\Z\]][\Z[Z[[\ZY]\Z[ZZ[[[][XWYZYYYXWYXYWYWXWVXXWWWVXVVWZgs|n`Z[\\YXWWXYW\TTSTWXVTRQTTVSTSTUUWTRTSSVSTUWUTWXWWW[ZWUVVTTTUW[WSTSSVWWUXPPOMQQONPPQQSQRPPOST[\\YVRQTTRQQQRSRRQPPRSPRPQNQQQPPQTTSSXVTRORRPQOOPPQQRRWRRUURVXSTQRRRQRSY\SRVUSY\Z_hf_TVTUSRRRTSQSSUVQQRUTRRQTRRSQPQRRTX[ZUVVYZW\_h\SPQUXZ[YXXXSRSSRQSUSURSQROSSSRROSSPOQRSTX^b\STRSR^e^SacbYSZdibYVUTTUXYXVUTRRRTTUYWZ[\YYV_gigdcc_[a_[a^f`bbhu{wwux{sibbeiknfd]_``cb_^^]^^^^^^\]\Z]\\\\_]^[]]\\]\]]\]^^^__^]\[\][[^[Z[\\XZZZ\YYZZXYZZXZZXWYXWWXXVXWX]]]][]]^__^[\]]]\\\]Z][\[Z[\\[\Z[\[ZZZ\[Z[\ZXY[[WXXWXVWYVYWXXXWWYXWVVXWX_ny{i]UWSXXXXXXYW]TTRTWVVSRRTUUSTSTTVWTSTSTUSTTVUTTTWWWYYWUUTVUWXWUWRYUVWVUZWPPPMQOMNOPPORQQNQQUSX[ifWUTUUSPQQQQPRQQQPQPRSSQPPPPOPSRSSUSSQQQOOQQPOOPRSUVUUUWUTRSPSRRQTRV_bZX[][XVU[ehb`YZ[YURRWRRTSSUXUSRTRTPTTRQRTRQQRTSSVZ[[YV^ag[SRTRUTPRTUWRRSQQRUUTTSSPQPOPPOQQRPPPRRSSUX]ZSSSSSZ\QS\Z`XT^il^UUUTUVZ[ZVUTSRRTUW[Z]``\\V\cdba``][`^Y]bqdmlpv{tomorpjddfjggba^`[^^_]_b^^^_^]]]\\[\\[[]Y]^\^]\\^\\\\]_^`^^]\[[\\]^]Z[]ZZZZZ[YZZ[[YXYXZZYZXVXWVXXWWWW[]^]^_]a`_^\]\\^\\]\\\\]][]\][\Y\\[Z[[ZZ[\\ZWXXWYXWXUXUYTWXVWUXXXWXWWWW[gwxndVWUSUWWZYZZX_TTRTWTVSQSUUTSTSTTVWTSTSUUSTTVUTTTVVVXWVWXXWVWYWTVWXWZYVWYWPOPMQMMOOPONQPPNQQVVYfssg[[TTTRPPPPORSRPQQPQUPSPPQQRSROQRPRPPPSPPQQPOQQQTUTVVWVUSUQTRUSPSY^b_WTSQPSRRW]b_^bXZZXQRUSQVRSTVVTQSUUTQRRQQPPOQRSRSVZYVWY[_c[TRSURRQSSRUSPQRRRRRSUTQPRRQPQOPOPOPRRRQTUVUSSQQSQTTQTTWUUXZfeVYVUWXYZ[YUTTTSRTVY]^`ed^[VZ__^^]^[[`]X\_niplmqveejmoolhedgc`^bb^]\^__ae_`\`]]^_ZZ^]]]]]\]\\]^Z`]Z]\\^[\]\\^[[[[\]\\]ZZZ[[\X\YZX[YY\WZZZZ[YXWVWVWWWWXWY[[][^`^_Z][[[]][[\\[\Z[\[[\[[[Z\[Z[ZZZY[\ZYXXXYXXWUXWWVWWXTXXWWVYWWXW`o~xc[XXVWTSUY^\[[ZUTSTWSVSQUUUSSTSTUWWSTSSUUTTTUUTTTVUVXVVVWWVUWYYVXTVX[YWSXRPOQMQLNPNPNMPOPORRWYZgnpi``XWWQRRQPRUSRRPQRRRRRQPSSSPQPSQOROPPNSPRQRPRTRSRRUQOTRSWSTSUTS]ZYWTQRQRRQTTUZ]\`]YUSVSRVOQWSUSVVRPTUVRRPPRUTRNRRRSSVVVVVX_hh`WSTUUSRQRQRQSSSQSRSSSRRQQSPQQOPQPRQSSTRUUQSRTRSRQSTSSTSRSY\e^WWXYZ^YWSTTSRSTSUX__bdjia[VW[ZY[[[Z[`\V[\lnsljnqdfjknmlkjgcbaabcb^^_bdfb_^`_]]_\X[\\\]\\]\\]\]]\\]]\ZZ]^^[\][ZZ\]\Z[ZXZZ[Y\[[XYYXYZ[XZ[YXZ[ZXUVWVWWYXWWVX[\Z^\\Z]Z[[][[Y\[Y[ZZ\\ZY\]\[^Y[[Z\[Y\[YYW[YWXXWYYWYWXUXVUXVWWVWYWYes|dUVVWYYXUYa^\\VWVSS[VURSSVVSTTTTUWWSTSTUUTTTUUTTTVUUWVVVWWVUWYYVWSUX[ZYVTSPPPPNOQQNQNLOOPORSX\[eimlfe]\VQQQPPSVPPSWUTSQRQPQSSPRQNQPPQQRPQQOSRRPROQSSRSRPPPPUUTSWW_g^PQQOSTSTWVXV__[[\[TRTQRPSQURURTURPUURQQPORTTSRPRTSSXVTVTU[febZTTSSUSSSPSQPRRORRSQRSSSRRQPPPOOQPPRSVRVRTRTURSTSUTTSQQRRXa]WZZY[[][TSTSUTSW]aejmnljnd\VUWVUXXYX[`[UXZiswlgllcgkimlklieba`bddb__`cdea_c]^\^][[Y\[]\[\]\[]]^^^]_[]]\]^\[\\[Z[\^][[[\ZYYZ[Z[YXXYYZZY]Z[Y[ZYXWXWUXYXXYZX[Z\^]\]Z\\[]\]\ZY\Y\ZZ[[[Z[\ZZ\Z\Z\^YZ[XYXYYZXYXXXXWXWWUVVXWUWWYXYV\iw{a[XUWZXXVY``^^VTYSTWXQSRUUTSSUTUSXWSUSVUUTTTTUTTTUTUWVVVWWUUVYYVWSUXYXXVTSRRRNTQQSNOOLNMPPSTY`]`djnlja^VQPPPPSTPQSVUSQSRTSRQRPQQQRPRQQPRQPRRQQROSPSQQRQRPRRSTST[c`_YSSTPQTVWWVXT\^[WVXTQRROPSQTSVSSOTPTQOPRQNPRTRPPRTTTXYVWTSXZdi\WUTSSTSQQRPQRQORTRWSRQRSSPPPQQQPRQOPTUVRSTTTTTRVVSTTSQPSVYWVY^]][ZZWSSWY]cbgopponkmqeXTSSUUVXWW\`[TUWgxzldghbhlhlkmmhca``abb`__```acda`_\_]^YY[[]\\Z]^\\\^]\]\]]\\[Z\[ZZZZZ]]]\[YZ[ZYZ[Z[[YYYY[Y[Z\[Y[ZWXYYYZZXZZYZZ[[[\[Z[[\\\\\\Z\[X][\[[[Z[Z[[[ZX[\\[[\YYX[VZVZYXWXWXXXVVVVUWVXVWXYX_kx{n\\XVYVWWXY\]ZVVVVTSQPTQTWRTURUWWUXWXWWXWUUUTTUTTTUSTVVVUVWUTVZYWWSUWXWWVTSSOOVTOPPOONQPMNPRUVY\Z`hqrpf]UQOOPPRSQRTUUSQRRTRRQQQQQQQRRPQQRSQRTRSOQQQQPRPPRPSSRSV^c_WUTRTTRPRUWXWZSUVSTTWURQQQTTPQRSSRPTRROQORQMQRQQQQSRTU]gbXUUUUak^YUTSRSRRRRRRRQSRSSWQTORPSQQQRQRQPQQRSSUSSUTVTRVUTSTPRRTTTWWVY^\[Z[\ZZ[^dltsjrrrskjmmcWTUVVVTTTTTUVVTUe~~lbbcaimfklpngb`__a`a_`_```abca^]]^\[[[[Z\[\Z][^]\\]\\[]^]\\[[\Z\[[[\[\[YYZZZYZXZZYYZZYZ\[[[YX[ZWXXXXXXYXYYZ\[Z[[YZ\YZZZZZ\YZ[Y]\[\Z]]Z\Z[[Z[\\ZZ[XZ[YYZ[ZXYXWZZXWWUYWWWWVWWVVY]epyyeY[WVXUWWYZY[ZVUTTRRTSSSRVUTURXXZWXVXYXZXVVVVUVWUTUSTVVVUVWTTWZYWWSTVWVVVTSQQRQRNNNNQQPTPOPRSRVWV]despc[UQOOPQQRQSTTUSRRRTRRQQQQRSRSRQQRRQOQURSQRTRQRQOOPPPQQR^[XVURSUSTSRQSUSUWURPRPWTUTSQSVUPPRQPRRPRQOROSPPRNOSPRSRSSgpbXWUU[fiaXTRTRSSQTRQRTSRSRQTQRQRQSUQRSTRPRRQRSRRSQRTSVTRURSSQRSRSRTTUWZYY\]eidggjirmkmlpsklkjgZUSTTSTTSTWVVZ[\eqa___aknekosof`_^_`__^````abbba]\]]\[[[[\]Y`[][\^\Z[\^\]\Z]Z[]\[\ZZZ\]][\Y\W[YZZYYXXZ\[YYYZZYYZXY[YXXXVYYZZZZX[\[ZZ[\ZZ[ZZ[]YZY\[\Z[[ZZ[[\\[[\ZXZ[ZZYXYYYXZYXXWWYYWVYWWVVUVXVXY_lyl][WWXXT[YZZX\XXVTTSTSSSSTUTUWUXVYWUVXUXXVUVSUUVVUTVUUVVVUVWTTWZYWWSTUVUUVTSTSQQRRPNMLNQPPORPPSTSS]]\b`\[VRPPQRQQRTUTVTSRRTRRRRRQTUTTSQPQRQPQSQQPQQRQQQROSNRPR\XURPSSTSRQSTQPSRQTTSQQURUSUSSSRRPRQOPQRQRQOPRSSPQOOPORRQQSXb]VXVW`b_\VSSQSVQTTRQQRQSQSUSRSTTUSTSQSRPPRPSRRRRSSSRRSTTSSRSRSTQTSTSUZ[\]_acehmmljjgefkhmghkmi[YXTUSTUTUXWV]gcovsdhh_`hw{rqvpf_^]^_]^]a``aabbba\[]\\[[\\]\Y_[][\][Z\\]][\\ZY][Z[[Z[Z[]\ZZYWV\XZX\YZY[[[XYYZZYYYZXYYZYYXXWYYYZ[VZZYYZ[\\Z[[ZZ\ZZ[[[ZZ\YZ]X]Z\[X[Z[][XWXYZYYYXWWWWYWXVYXXXVUUVWWZcwzla`XYXVWY^\YY^WVUTUSVVSRTUTTTTVWVXUUUTUUUTUUVTUUUUUSUVVWXVTVYX\[ZXWSTTUTTVTSTTOOPTRNNPMNOMPNRNRRSS_cYSUWVSQQSTTSQQPSSSTTRSTRSSSRQVWVUTQPQSRQSRQQQQQPPORRUURTRX_URQPPQSRRRQSSQQQRUUSRTSSRUUTSXXXTRRQPQRQQRSTQOPPROPOPRRRRPRYWRZWV]]XWUSUTQQQVSSSRSRTQRRTTZZTTSQPSSORQVSTRRSSSSSSTTQSURRQQQSOSTSUV\\`a]\cknmlkjfaeedefcef`c]^XVTTSTVUV]bjkalxyitva_c{nunoib_^__\]\baabbcbaa[[]\\[\\]]\Z^[]\\][Z\\]\\[Y[[\YZ\\ZZ\\\[YZWYX[XYYWYY[[ZXY[XYYXYXYWWYYZYWWYW\ZYX[[ZZZY[[\[Z[Z\ZY[ZZ\Z\X\\\Y^XZY[Z[]\ZYZYXXYZXXYYXVWWXWXYWWWUVUXV\n}gac^X\YVV\Z]Y\^TTUTSSXVTUUVTUUUUWVVTUWVUWVVUVUUUTVSTUUUVVUUTXYW\[[YYWXXTSTWUSSOPPRQQOPOOOOMOOOQQPR[acVRUTSTUSVUSSQQSRRRSUSTSSTVUSQXYXVUQPQSRSRRQQRRQQPORRTSSUW\_SRRNOSRTQRSRQPRPRUURRTVSTSUTVZ\VSRRPSQQQQRRTTRPPPQSRSRRQRTRURTV[WYUVWUUUUTRSTSUSRQRPQVRRTY^[STOPURRTUTVPTQRQSRSTSQSQRSRQRRQQQTSVTXahc^Ygonjhdfffffehfjgja`^ZYTSUTUYZZhnnicn~zfpq^`fsxfqkwtfd_``]\agdaccdbabZ[][\[\]]\\[^\]\]][Z\\]\[ZY[[[YZ[Z\]\[[[[XYZWYYZYYYZYY[XYWZYYXZZX[YYYZZYYZY\Y[ZYYZZ\[[\[\\\ZYYYZYZ\Y[[Z[\[Y[[X[Z\[[[WYYWXZYWXYYWYZWWXWWWVYVWVWZev}mb`]WW]ZVXXZ^]a[TTTUTUTTSUTUSUVTTWVUVTSVXWVXVWSVSWVUWSTUUVWXVVVVYXY[YUXWVUTVWWRRQPPNPQONOPPPOOPOPPQY_XUSTUUVWSTOQRRPPRQRRTUTVSUXXSW_ba^WQPQTSRQRQQSRRQPPRSTRTUX[[RQRRSPQRRPQPPRRTTVURPSUTSTVTVZZVOTSRSTUQRQRTTUTSSSRQQSQOTQRSURRZZWUVYUVUVUQSRRSRRRTQRYUSV`_ZWSPQWSWYWUSTVTRTTSSRPPSSQRRRQQRQRTSTSXjp^]Wdeigfbhmmkjkmnopngb^]VWUUVYZZ`cfkd_eqslic]`jupmqvy~{k^^`a`fhcbabefed]Z^[\\]^]\\\]\]]]][[\]]\ZZY[[ZZ[[Z[\[ZZ[\ZYYXYZYXZYWWZZZ[X[YZXYZWZXYYYYXXYZ[[[ZYZZZ]Z][][[ZZ[[\ZZ\[Z[[[Z[Z[Z[Y[ZZ[YVXYVVXWXYWXXUWWUUXXWXWXWUWX[kvo`ca`VW[YVWYZ[_aWUSSTSUTSSSVTQTVSSTTTTUVUXXTUVWUXWWVUUTTTUTXTUWUXZXVWXXXVXZUYT\STPPPNQPOPOOPTQNNPNPRUVQQRV]_^URQPTSRTQRORRRRQSRVZ_\[^`eaVQPRQQQQRQQTSRQPPRSSSTUZZXRQRRSPQQQPPQNSXWRTUQPTUUTUTSVUSUQWXVUQTRURQRRSTUTUVVSQQRRRSSRSQRUUTWXXURSQQPTQRQQSSRRSUV[`WUXURVVXYWUWUVUQSRVWSQQRQRPRQPRQQQQRTTT^ld[YW`hfflifklkjjjnnoqsn]ZURTS[__XY__g^[`ptsspf_`joponx}ne]^]ehigb__aefeb\Y]\]]^[[\\]]]]]]][[\]][ZYY[[Z[Z[Z[[ZZZZ[YXXXYZYYZXXY[Z[ZX[XZXZ\XWXYYZYZZ[[[YZ[Z[[[[Y]Y[YZZZ\Z\[[ZZY[\YZ[Z[[XYZXY[ZYXYVXXXVXXVWWWWYYXWWWVUXYWZeovfa`caZXXVYZ[\\`^WVUUUTSTRQXTSUWUVVTRRTVUUXZVTUVWXWVVUTUTVUUTWTUWUXUW\XVXVW^\XU[RRRQQPTNRNOPSUQPNPQQQPQRTRVdf_VUWTTTSRTTPSQQQSSSV^b[Y[Z^]URQQPPQPRPRORPQPQRTSSTT[YUQQQQSQQQPPQQPSWUSTVRQSVTTRQSTSSPRVYUSRSSRPQMSPSSRRUXVTSSQPTSQSRSURVUUWURQQTRVQRPSSTTRSY][YTSSTSTSXUTRXUTRSTSUVWTQRRQPQPRSRUQRRRTUY_[ZVW_mgkmhhommljfoppooh[Y[[\fplY[V[Z\Y`]ckpqrk[^kpjinlpha_^]bhhbba`bed`a][\^][\[[\]^^\\]]]\\]^\[YYY[[[[Z[[[ZYZZYZYWWXYYXYYXXYZZZ[[ZXYYYYXXWZYZYY[YZZ[[YY[\\ZYY[ZZZZ\[Y[Z[X[[Y\[ZZZ][YZYXY[YWYZXWYWWXWXXXXWXWVWWXWWWXW[hvug][WTUUVVZ[]]`YVVWVTRQPPTTSRWWWWXWURVTTSY[ZTTRVWWVVVUUVWUVUYUXVUYWUUUUUVWYYWYZRQPOOPRRPOSQRRQPNSQQPQTUVW`i_VVTUSQTPSPQQSRSSUTUX_c^\^[Z[VQPPOPQPRPQPPOPQORPSUTS]XRQPPQSRQQPQSRRTVSTUURRTVTTRQTTQQPRTSTRRSOQPQPPQORQQRWTWTRQRQQQQSTSSTUSTURUTRSRTQUSTTWVWWZXUSSTSQSTRRSSTRQQTTRRUTRSQQRRQQRSTTSSRSTQS\[XYWZgkjikikmglkfkkrmbXY^`fr|u[[ZYWWUWZdmcadmklljigbenh`^__`caababbcbcb^]\Z\[[\[[]\\^]]]]\^^^][YYY[\[ZZ[[[YYYYYYYWWXYYXYYXYYZYZZZZXXYZX[VYYYYX\\YZZ[[ZZ[\[[\ZZZZ\\[\Z][Y[[[YZZ[ZZ[[YZZYYYYYYZZWYYWYXYWXWWXUVWXWVVUVX]ni\VTSVQSXY\Y]_XZYXURQSSRRSSTVTVWYXWUXTW`[[YUUUWWWVVXVTWWTTVTUYWVXWVXQTVXYXWWVWNPQPOPPOPQRQSQNQRPPQQPORX[cg\UUTSSRRUROPQRQRVSQVY]_^Z\ZWWUQPPQOQPQSPSPPQQRTRRSUU^WQSSPQTSRQRSRRTUUTTSTSSUVUTSQTTRQPQRQRQRRPQPSSSQQPRRRRRTRTPRRRRRSSTUSTTSTQSRSRRTPUSVUWX[TPRSRRSQQRQQRSRSUTRSTQQRTPTQSQQRQRRSVUSSUURTa[\[\Wammlnmljdhhcf^Y[[U\`^avx`Y[[WXX[Zhk_egfed]coifdedaaabbaa`a`acabbd^]^\^\[\[[\_]]]^]_[^[]Z\WXYYYYZ[[\[YYYXXXYVWXXXXYYXYXZYZYYZXXYZXZVYZ[X\XZZYZ[Z\ZY\[ZZZ\\Y\[[ZX[ZZZ\XZY[\\[Z\XZZZYYYWXZYYYYYXYVWWWYUWTXYUUVXWZ`o}}b]YXTUTUW[\[a\TXXWSRQSSSTTSUWVTSVWVUTUW\[WVVVXUWYVWVVUVWSSVUWYWXYXTUUVWXZZXWUVQROPQPONORTSTRQQNMNPQRVQZYXXTSSQSTQPQQOSQRPTQSTTTVWRTUTSTTROQQPRPPQPPQPTSUSQRRUU`VRUTQRTUPOSUQSWVUSRRSTTVVUUSRTUTQPQRQQQRRQPRRQQQPPPQPRQTPURORUUUUUUTVUUTRQRSSRRTSUW[XVTSRTQSRQRQSTRTTSTSSTSTTQTTTQUQSSQQPQPRUUSTTSRQSVV]YX\hhlpljfjkf^^[UU[W]ZY`xfWZXXY[YWb_aprdZY`doflqpldaaacdba``dfc`d`_]]^[Z[^\]__^]]^^[]\[[Z[YX[WZY[\]\[YYYXXWYVWXXXXYYYXXZYZYYZXXYZYYWYZZX[XZZZZ]\W\Y\\YZ[YY[\ZZ\[[ZYY[YZY[\\[]ZZZZZYZXYYYZYXXXYXWXYWYWXUYWSWYWX[dxpb]ZYXVSUZ\^\eVUWUWSRUTSQTTRUVVVVUUTTUTVXVRUUVXZVZTTWVTXWVTUUVYX[ZWTTTWWUVTSYVURQONOOPRPPSRQTTQPPNSOUTQ[YUSSRTUVVROQQOQSTVZUSTUTWQSPXXSUSPQRPOQQSUQPPPTQUQORQWYaVTVQORUTSPSURTVSSSQQSUUXWVUTRTVTQPQSQQQRRQPRRRQQQQNPQPSRPTQSTVXXUUVVSUVRRRQRRRSRSUY^WTSRRQTTSSQSRSRUVSSSSTSVUUVTPPRRTSSRPPPQSTRRTSSTTUYZYY[_djgfe_bc\ZVVWVXWZY[`r¨pXY\YZ[WVZYaunaX]bckjpz|oie``_`baachcb_a`c\\\\]]^ZZ[^\^]\__]^]\[YZ[YYZY\\\[ZZZWZYWXYVXXXXYYXWXZYZXYZXYYZYXXYZZX[YZZZZ\[X[YZ\ZYZ[Z\[Z[]\YZZZZY[[\ZZ[[YYZ[XZZWYZXZZWYZXWVWWWVUXWVUUWWYX\mke^WVYZXUZ\[]cVUUUWUUQWPRVSQWSVTVYWUTUVTTTRSUVVUXWSTVWTWVVVUWXXXYYXTUYUVUTSVSVTPSRQNPPROPONQSQQQQSUSVQQTXVUTY[a]YUTQPQUWVSTQSSSVSTUSZbTSQQSQPPRTRRQOPOPOPSPQOWXcRSSNRQTVUUSUTVVRTTRSVVVVXWVUSUWTQPSTQQQRRQPRSSQQQQOPQQTRQQTSVWXWUYWVUSSRRRRQRSSTUTVZUTTSRRRSRTVSTURUUVTUUUTUVWWRSRPQQSNRQPRRRUSVUTSSVWXXWWY\_e_ZZVWVTTVUWUUXYW^ap£«ªu\ZWXXYYVVY`j_WY[\\dmtnf___`a``acd_^abc^^\^_\[[]Z^\`]\\_^]^[Z\YY[Y[Z^\^[YYXYVWYWWWXWWXWYVWYZYZXYZXYYZZYYYYZXZZZZZZ[ZY[Z[\ZYZZZ[\]]XW[[YYZ\\ZZ[YYZ\ZYYZZZZZXYZYYZZXYXXXVVWWVUUUYUYY_rmaaZVVVVXYZZ\a^UWTUWWYSRRRVSSRVUSUUTTWVTTTRUSTUTSVVVWXRVWSUUUUUWWXYYZZXVVTSVWSVTSQRSSSOMPPNPMQQQQSUTSURQUUWUUUW`\YVZQSSXZTPPRRRTQRSRQYb\QRQOSQROPRQPQRNNQPQTRNRW`STPQTSWVVUUUUUTSUTTVWTTUWVVVUVWSRQUUQQQRRPPRTSRQQQQQQRURQQSSUVWUTYWVRRTRRQRPTTSSSVYVSTSRRQQQRSWSTRPSTUTSRSSTTUURRSQQSPRPTQQQRSTTURRSRWWVTVW]eibUUSUUWXUVWUVUTW[Yo«­]\UWVVXXVY^b^ZZ\ZYaku}oe__`b`_a`_bdbbba_]][^\]^[]^[]]^]_^^^[[[\ZYZ\\]\\XZYXXXVYXVWZVUWYXWWYYYZXX[YZZZ[ZZYXZXZZZZYZZZZZZ[\ZYZZZ[\\\XWZZZZZ[YYZ[[Z[ZXYXZW[YWYXYYZYYZXXWWWVWVUTUUVUZZct|caZZWWWXXWYY^_[VTTVWUUUSTSURSUUUURSTRSUUTVSTTTRRTVWWXWSVWTVVUUUSUVXYZZWVWUSUXTTVPOOPRROOPPOPNOPRQQQQRSUVWUSRSTTUVUWZVV[^\URQQQTTRRQPTU\_RQSTRORPORMQRQOQQORWSPUZaTTNQUXUUUSVSUVSVVUUUXXUSTSTVUTTSRPQQRRPRRPQSUSRQQQRQRSVRRRSTTUVTSWUURRRSRTTRUVSSQU]XRSRRPQQRSTTYSUSRQRSRRRSSRRRRRQQRSRQTRQPQQVSTTSPQTTTVUVVWdslYUUXWXWWVVUYWUXZYb§«fWUVVXYTUb]`ece`_abgp|wrjc_aa`bba`eecdba^]][[[\]\\]^]^]^_][\Z[XWZZ\\\[[[ZYYXYYYZVWWYZXWZXYZYY[ZYZ[ZXZ[X[[YXZXZZZZYZYYYZ[[\[YYZZ[[\\YXZZZZZZYYZ[\XX[ZZYZYXYWYXYYXYZXVVWVXXUUTTUVVWWYkg\W[]UXVTVWYW][XVTSVVSUSRSTUTSRUUTTUTTWVSUUSVUVUSUUXXUVVXWUVVTVVVVVVVYXUUWUTVVSTWQPOOQQQPOPQPNQPPQPQPPUVWVSTUUWTTRTTVX\^\WUUTURRTUVTQQTZ\VSZPRPPONPQSSSPOQPQTPQ[^]VSNRQUYWSTTWUSWWTUVTYWSTRQRVUSTVQPQQSRQSROQRTUSRQQTRSTWRRRSSTTUSSVTTRRRSRTTRUUSRTTYVTUTSQPSRRTSWURTSPRRQSQSRPRRRRSRTTQQQQQQPRSRURRPSQUVUWXYWasm[UTVZUSWUTWXWXZ][]z`XYWVXXUX]^`hnqggngaly}urqjb`bcaabgiccfb_[]]\[Z[]Z[\\[\ZY[XXXWYVYX[\Z[Z[YXXXYYYXZXZWXXZUZXYZZXXXYYXXWZYYZ[ZYZXZYZZYZXYYY[[\[YYZZZ[\\YXZZZZZYYYZ[\XXZYZZZYZWZ[XYYYXXXXUWWWUVUUVUVVWY^qod[__UWWZUYYY_WVWUVVTRRUUTVWUVVUSSVUSUXWUURSSVTUTUWVUTTVXXVWSVVWWWWTXY[WVVVWYWVTTROPMPRPOMOPMONPQQNROTTTXVWYWUSUWUTTV[[^YSQRQPOOSWZURQQW^WPQPPRPQROSTWURSOPQRORT^^VQOPRUUVTTTTTXSTTSVTSRQURPSURSTTRTUSSRSTOSQQRURSQRSSRVXSSSSSSSTRRTSTRRSSSTTSUUSRSSXVTTTRRSRQSRQSTSSURSRRPPQSQSQRPRSTSQQPPQPQRQSRQRRTVRWT[\XXi|v_XTVYYVXWTVZ\Z]]XZbulaYtz]XZYY^``ccikb`kuebmqsqpjc`b``acicccdca^[\]^][[\]\[[[YW]\YZYZZY[Y\ZZ\[ZYXXXXXXYXYWYWWXZXZXZYVWYZXXXXYYYYXYYZZYZYZ[XZXY\[\\YYZZZ[\\ZYZZZZZYYYZ[\XYZYZZYYYWYZWXYXYYUXVWVVWWYVWUVVXY`rq]\]]WVVVXWX\cYTVXXUSSVXTSVXYWWVSVVUTTXXVUTRWYWVSTWVUSTUWWXVUWYYXVUWWVWWUUVTYYVTUQQPONQONMNOMNOOQNMPQRSUYYZ\WTRTWUST^b_ZXUQQQQPRTWVRPQQTZVSSOOQPQQPSTYXRQPORPQSY]bVQRRTUSUSQPQSRSRSPWQRRPSQOPRRTSPQRSRVTQQPPQORSQQPSTTRVXSZYTTSSSRRSSSRRSSSTUTUTSRSSWWTTSRRRRQPPRQRTTSRSUVTSQSRQQPSSSSQQPMSQQQRSQRSQU]VSUVXYVVdlpdZSWXVVWUSTVXX[\WWWW[W_e_[ciljedc][cdemf]jryrttc`aaabehd`_b`c`_^]\\ZZ][[\[[YV[`\^\\Y]Z_\[Y\ZYZZWVWYYWWXXYXWYWYYYZUZWYZXXZZYWXZYXYYYYZ[[ZY\XY\ZZZWYZZZ[\\ZYZZZZZYYYZ[\XYYYZZYYXWYZWWXXXXUWWWVWVWVXVVXUWYbm~zh\YXZYTVUWY_]XVSTYUQUVTUUVWWVUVUVUVVSTVWUSUUWYWTVUVTTUVWWZVUXXZYSVVWWVVUUWVWZZUVQQPQOQOPNNLLMLNPNNOQRUYdhmp^VSTVSW[cd\VSSVXSQXYVRRRTPQRVSUTRPPPRRPQSX]SSOSRSW[ZZbUTUTTSRPPQQPRQQQRQSPSQPPQPTROTTQPRSRSRQRRSPQRURTSUTRRRSZ\YUTTSSRRTTSSSSTTTUUUTSRSRWWTTSRRRSRQPRQQSSRQRRSSRSQPQPSQRQQSSQRTRTRQRRSRRX[TRTUTUUWajklYSUYVVUQRTVYZZ]ZUXdgaahjjh`bvoefaa[Wgi`__ivwyxtmg]^`abea`c^^]`a`]^[\[\[^\[Y[ZVZ^]\][ZZ[\[[ZYZYYXVWYXWVVXYYZVXYYYYYXYYYWYYXYZWXXWWXXXZZX[XZ[YY[YYZY[[_Z[[[\ZZZ[[ZYYYZ[\XYYYZZYYXWYYVWXXXXUWWWVWVVVUUUXTXYej~}l^ZVWXYWVVW\aVSUSSTRRTUTUTTWWWXUTUVUVWVTVWVUUVVWUUUVVVUUVUUUUYYWXWUVXUUWWYYUYZ\WXQQSSOONLNOJMLMNNQONPPT_r}|j^S\\Y`aa`[UUYca[XXXTRQSSQPRTPUPQRSOQRQSTX[UTTSTW\\a\eVUVSUQTTQQQQPPPOPRSRPPPNOQRSRSRRONQQPOQSSRQRTVUTRTSSQSSWXUUTTSQRSTUSSRRSRTVVUTSSRRVXTRRRRRSSRQRQQRSRQRRRRRRRRTRRQSPSRRPSRTTSRQSSRTXWXYVUTTVU]qyrXWUVUSSSTUX^ZX][UZ|cab_`jaZddY_c^YX]^_[jywpola___`b`a`^_^_`c^`\\\[[[[[ZY[ZWY__]]]\[Z[ZYZ[ZYZXXVYWXYVXXYYYXYXXZXVYWZWZYYYYXXZXXVXXYYY[ZYYXZZZ[Z\[Y\Y]ZYZYYYZ[Z[ZZ[\]YXXYZZYYXWYYVWXXXXUWWWVWVVVUUVWTX[ckqe_XVXXVUY[Y`aUTTRSSPSQSTSSTTSUWSQSYVXWUWWXVVWWUWVVYVUWVVVUVWVXXVVUTWZYXXXZYVXZYVWQRTTRQPMLNMLNOTQQPOQPYtrncghifaaZY[]cd[XUUUUSQTTRRRVSPPQNSSVQQTVVUTRSTVXZ[caf[TTRUUYUSTTQQPNOPQQOOPOOPPSOSQSRNRPNNORRTTSSTTTTUUUTTTRUSURUSRUSTTUSRRRSRTVSTSSSSRVYTQRRRRTTSRRQQRSRQRRRRRRRRSQQQSSSRNUPQTTSSRUSSTWZ\YUSSTUU^mllZUUXTVTVVUZ\YY^[VQl{eagaad]VWZY^^VXZZ_b[aijrtomkb]__a_^_`]baabd`\^\ZZ\[\\ZX[Z[[^_]\]^]\[[YZZZ[YZ[XWVZXWYVYXXZXXXXYZYWYWZXUZWYYWXYX[ZZYWYYZYXXXYXYZZZY][ZZY\YW[X[[ZZZ[\YYXYZZYZXWYXUWXXXXUWWWWXWVVUUWWUY]epmb]WUWZYVYZ]b^VVYXTURSSTRSRURSVTQTUWXXVWYUXV\ZUVWWWXUVWWVWTYXYWXWWUTVXYYZYYYVXXVZVNRSSOQQQMMNMRNTTQPQQPb¡§ªvmikqme`\Y`^^]YYTTTRRQRSUSRRSRRRPRRTQPSTSQSRRQUXXXVX`^SVRYWTWRVUQQQPQPPQPOQPPQOPOPPRQQROONOPPPQTTTTSUVUUX]\UTSSRUTPTWVTSRSRQQSTTQQRSRRRSXURRRRRUUUSRQQQSQQRRRRRRRRRQQQSSRPNTPQSUUSRSTSSV[ZVVUSTSSZgnpbUWXXSRTWVZ\XW[`XY_b\\c_YXUVWX\YX\[]ksnbdaewpqsi^[^____ac`eccae__]\Z\Y[\\][Z\\[^^^_\\[Z[\YYYYZ[YZWZWYYXWYVYUYXXYYWWYXWXXVXYXXYZU]XZYZ[Y[Z[XZ\ZZZ[ZZZ\Z\ZZZY[Y\X\YZZY[YXYZZYYZYWXYXUXXXXXUWWWWXWVVVVWWVY_gu|i_\WUWXXVYZ^]]YVVVUUTSSTTPTTPRWRRSWWYWTUWW[ZXWSVYVVVUVWVVWSXXZYWWXVUUVVXZYZWVWXZ\YPQRSQMQQONLOQURRQOSTTX¤°² pgadli]Z]a_XZ]YXVSTVWVUSUTRSVWSRSQQSNOQRQPRPQQWV][^^b`XWUSUSSWRUUVSRUPQOPTUSQQROMNONONOOOMNOLQOQSUSSTVUV^lm^WUTTUTRROTUSSTRSQSTSSRRUTRRW\VSSSSTTSSTSRQQSQRRRRRRRQRRQQRSSROOSPQSTTSRRSSSW[[XXVRTQQVdon`UVWWUSSUVWUUUYcY_][\X\[UTWWY[\[]cbdlstxd_swrxsm_X\`^]`dbbfddd^a`[[[[][Z][\\[ZZ]_]^]\]Y][[[[[YYYYYYVXZZWYZWXYYXXXYVVXWXYXWYYZVX[XWYWYVYYXYXX[Z[ZYZYZ[[ZZ[ZYX\[X[YZYZYZY[YYYXYXXXYWXWYXXXUWXWWXWVVVVWVVZaizxf\[VTVWXWY[_^\YVVUTTUSTSUSSSSUVWRUVXWRWXUY[[WSY[ZWVVUXXUVWVYZXTXZXXUWWVXYXVWVVY[WVPPRRRQPPPOMMOOSQQQWWTVg¡±£yjfeb^YVZ\XSX\ZVZTT^b]YSUVSW\WTSSRPOQTUTRTRSTQVU^X[]^jYSTSQRSURURSTUUQSQQSTSQPOOONMMNMOMONNOMOOPQVSUSSTVg~pd]XUTSSQQTVQTTRURRSSTXVTUTT[b\SRSRTUQRSRSSQRRRRRRRRRQSRQQRSRQPORQQSTSSRRRRSWYYWVTRQQSSV^ZVVUSVVSSTUSRSVY`[WXWYYWYVVWXY[\^_ejkmrmoqikiq{{lf\[_]_]``addddbcb_^^]Y\Y[Z]\^[Y\___]]\[\ZY[Z[\ZZZYYYZYXXYXYXW[VYZVXVVXXWXXXXZYZXYWZWXUXWXXWXZ\ZZYZYZZYYY\[Y[YZZZY[VZ^ZZYZYZXYYXXXXYXWXWWXVXWVYXVWVWVVWZclubYYVTVVXXY\`_[YWVUTTUSTSURRSTTUYVSUWSUUTVXX\ZWZZYYTUWWVVWXXWXYVXZZ[X[[XYWXWY[YXYWXQPQQOPQPPNLNOPSQRRV]VWes¯nkf]XYZXTRSXWVY^[\ebab]WTVT^ZRPRRQOPSUTSTTUQQRUXURRUiZWRQQQTTSTSUQTRQSTVOPVQSSQPOMNMOQLMMMNNNNTX`\X\Z[bw~qdZVTSRSTUSTSSURRRUVWVSVTS]c`XSURSTQQRQSRSUPPQRSTSRRRRQQSSRQPPQQQRSSSRRRRSWXXVTSQQQRSU[WTVTTTUVTVWURQVZ\g[VZ[YSYUVZXZ]\_^blptrikonpmr|xsq`\]^]Zbaa`cgebcdc`^Z\]Z^[\[ZZ][a__\\Z[[ZXZ[YZZZYWYYXWXXYZXXZXWYWXWWVYYVW[XWYYXXXYYWWVYWYWV[ZYW[Y[Y[[Z[Z[[ZZYYY[Y\W[Z[YYZYZYYX[ZYXWWVWVXVVWWTXWWVWXUVX[eoq^VXUSUVXYY]a_[YWWUTTUSTTURRSTUVXVSTVWUVVUVV[WYZYWVWWVVUUXVVXYWVYZ[Z\\[ZYXXZWZYXYWYPQRPQNRRQQPONPQORRRVX^fndf^YYUUSUQUbc[ciecekifeYUZYV^YSRTSRQPSSQRROPRRTTSRUQd\TXSQORTQRSRSSSQSUSPRSRRTSONMOOONNNMMNOOU^bllprvz© zmcXSUVWUTSURSTSTSTVXWYXUXbh]VUUVUUSSRRURTQQQRVRRPQPQRTRRRQSQQRRRSSSRRQQSUWVUSQPQQRSTYUUUTTTTTUYYWUSVWYecUXWVUUWXVZZ^cgernnonhjqpootwwvmaY^_^]bda^`cbbdbca^]Z\]]\\]XX_^b_\\\ZYZZ[[\Z[[ZZZZYYXYWZYVWXXXWWVYXWXXXXWUYXXXWWYXVWZY[\YXZVZWY[[[[ZZZ\[ZYZZYXYZ[Y[\YYYZYXYYX[YWYZXVWVWWWYXUWXUVWWUVX\et|[SWUSTVXZY^b^[YXWTTUUSTTURRSUVWXVSUVWVVVTTUXVVUVWVWWYXTWYUVYWYZYYYZZ[\[\YYZYVYWYZWPOORNNSORRRPPQQPQQQVZ_^azxsjX[ZWQQORZU[fffjihlt|viaZWXRR\[UPXZOROORROOPOQRRQRRRRZZU]SQPRQRSQRRURPSURQOOPPTVPPOOMONNMLNNOQUaip«®¢±²®¯¬t`WTTWUTTRRRTTUTQSVZ[[WW\dZVVVUUUTSSSRRTQRPRRUQRSSQPRTRQRRRQPQSSRSSRQPSTVUTQPPQQQSTWSVTTTTSTV[[YXYXX\cdZWWXVVVUWZ`jnnhmhnigjiihefosorpdZ]]\]``_`b__`cadb`^\ZZ\[[ZZ\\_a\\]]Y[[[Z]Z[Z[ZZYZXXXXXYXXYWZVZXUWWWYWZVYUWXXVYZXXWXZYZ[ZXZXWZ\[\[[ZZZZZYYYZYYZZZYXZ[ZYZYWZ[WYYYWXWVVVWXXWWWXXWWXUUWXYkwrWU\XVUVX[Y_d][YXWTTVUSTUURRSUXXWWTUVXWWVTTUWVVUVVVVYWZXWZVYY\[[YXYXX[WW[XUWY[Z[YXXPOOQNNROPQQUQRQQPQQTWVUWdme^XTUUQQQSW^[agkjljjxzl^ZZVRRZaSQWTQSQPTUQPPNPQPQQPPQTTSWWUSQQRQPRTVPPSQRRPPNOOPPOOOOPOMMMMNNPT^iw­²¬ÂÊ¿Ãº«saZWXXVUTRUXVTUUXWVT[[VUV`]XVVTUTSTTTSVUQRRRSTPQTTRPTSPNRPQPOQSSRQQQQQSUUTSPOQQQQSSUTUTTTTSSW^][[_^]]ab[ZYXWTV\^egmhh`ccihijgnjjknqrz{l_\^]^\_]`ec]\^_b`a_\\[\ZY\]]]^b]]Z]ZZZ[[Y[[[[ZYYXZYXYYWVWWWXUYUXWWYWXVWWVVXVV\WYZYWX[[ZZZ[WXY[]\[YZYWZVYYVZ[Z[ZYYYY[ZZYYYXXWXYYVYVXWWVWXVVXXWWWVUTWX\lssYRWSVVUY[\baYXYYXTTWUSTUURRSVYYWWTUWXXXVSSVWWWVWVVVYWZXY[TX[]_\ZYYXXYWVYZYZ[\]^XUUPOOPNORPPQPSQRQPOQRRRRSTW\]`YSRRTRVXW[Y_`figimstund]XYXRSZaWRSOTQRRUYTTOPOPOQOOQPRUSVYXSPSRTSVWTQRRNPPPRONNMOPPPPPONNQPRSROWcp¤¸ÂÐÚÖÒµ~mc]VVWUTRSUWXXVSUSTVYYV[_[YZVZUURTTSTVUUSRSRRTPQQRSOSQRPSQRQQRRSTRRSSQSUXXSQQQQQQSSSVTSTTTRTY``]^eec^_a]][ZXUW\]cdfa`_^``gkqlncntsxxxypb\[]_^_bbfc^^^_a^^_][]]\[[[]\\a_][\[[ZXY[[X][[YXWYWYZYXWWWXWVXWTWW[UXVUTXVYVXXXXYXXXZZ[[[ZWWZ\[[ZYY[ZXWYYYXX[X[ZXYYYYYWXXXYXYWVZXXWWUXUVWVXXWUVVUUXV^joxsXTVSUTT[Waf_WWVUVWWXXTTVURRTVZZVWTVWYYYVSTVWWWVWWWWYWZYZYTX[]^\[ZVWVYYYYYX[[XYXVVYPOOONORPQQPRQSQPOPRRRSSTTS[b]USTVYWTSUTUTYW[`hhgjb]WSVXVTW[XTTQRSTTVWTQPPOQPOOPNRWVSTVUTTTRRUYVUPQNPPRNRQLMMNOPPORQPPQS[h`SRahl´ÍÏÙÞÒ¾©}kTTVWVTTUTVXVTSRUUTXYY_VTUWVZ]_WUVTSTVSSSRQRSSRSUSPRRSSSURRQRPSSSTUSTVUUTTRQPPORSTSSTSUUTRU\cb_akhd_]_^`]\YVX\\abc`_^]_admye\\eebhl{{vm`\]^``eggddb`ab__^_\\\][\Z\[^`_][[[[\ZYZ^[\[\YXWXXYXWYVVVWXXWWXWXXUZVUTWWXWZTXXXZXXXX\\ZYXXZ[Z\[YXYZZYYW[XZYXYZYWWZYZXWYXZZYYZXVWVVUWUWVVWVWVXXVVVX^hmqjVTXQRTTVUWa_WXVWW[ZWUUSTTRRUW\[VXUVWYZZVRUVWXXWXXXXYWZYZWUY[]^\[ZWWVXXWVVYXYXUUXZUQQPOOPRQQQPPQSQPPPRRRTTTUTZ^[UVWZXTTUYYY\^ZZ\b]^`ZUSSWRSUZWTTVUSUSUVVSSOPOQPPSRNX^VTVVUTTRRTSTTRPNMOOQNPNKMLMPRPOW]][YW[jxlYYagn¼´ÉÔÐÐ²¦¦¡hUUUVUTUUTSVTRURRTTXZ\[USRVWWX\UXXWXWVRVSRQTRPRTWTPSTTQRTPQORRSPRSSRWWSSUWTPPQRRQTSRRTUTTSU_feaerke`[^`c_]ZXZ\\_aa_^]]^abira[[ZYYYczzxsja\^__cfgfddc`aa`]a]\\]\\\][]_^_^ZZ[\\ZZ[\YY[ZX[UYYXWXXWVYYXWWVVWWYYVYYUYWXZVXZYZVZWZZZZZXY[\\\[ZYYZYYZWZWYX[Y[XWXXZYXVWZYYZZXWVVTUUVUWUUVVWWVVVWVX\dlndUTUTUUUUVW_`Z^WYVYXWUUVVSTRRUYZZWWZXZ[[VRVVWXXWXYYXYWZZZWVY[]]\[[XXVXXWVVYXYXXXYXWQQOOOQSSRQPORTRQPPRRRUUUWUY[YUVVXVSSUY^^XY^abi`\XTURSUTSV\ZTRV[ZXUUUTTQOORPRSVQW]\XW\YUWVSRSSRRPPOMLPPMNNLMONPQRS]jne`ZWbs^YZ]t°À¿Ä¡ p`[VRVTURTVTTTSQSUTSXaf]TSRUWVTXTSVWUXXUWWVTTTRSRTTRSSSQPRRPPQTQSSVWVTTSVWVSQQPQRORSRRTUVVSSY^W[`lwraY]bfa^[Y[\[]^^^]\\^``ek^ZZYXYZbvvtsrf\ZY[[_bbaa``aba]]\\^\[\Z\\]Z^_\\[[[\ZZYZ\Z[YXWXXYXYWVVZVWXXWUVVWWWWXXWWXY[W[[XYXYYYZYYYX[[Y[ZZZXYYYXYYXXXY[YYZYYXXYYWXWYZZYWWYXUUSVRWTVVUVVVVTWVVYhmofVSTTVWWURU_`Z_VZXYYVWSUWXUSSRVWVWZZUUVXUTXZWYYXYZYYYWZZZXVZ[]]\[[YXVWXWWWYXYXXXYXWRRQNORRQRQQQRQQRQPRSSVUUXVXXWVVVVTSSUZ[[VWZ^emeVSWVRSWXVW^]WST[\WTSUVTSSTTQSUUT\aXVTUTQWUTQQRRSRPNLMNNMNNMNMMPQYbm}scba^jv^UV[ht¥©©~uyk_`aUVSTSTTSSRUTSTSUS^edXTTSUXWWVSUTTTUVUXYYWWXWWUUVUUTSQQTOPRQRQVVUXUSSWRWUSQQRQQQRSRTTRTTTSX\^\]_jse^ae`]]\[]][\\\]\[\]^^ad[YYXWY[arsqppe\[[\^`]^]_^_``][[Z\\[[Z[][\Y^_][^[Y]\Y[ZY\[X[YWZXWXVXVXWVYXXVWWWVUWXYWWYXYWXYYYVZY[Y[XYZZXX[Y[[XYXXZZZYYZYYXYZXZWXW[VZVZXXZYWXWVUUVVVVUUUVVUUSWVY]mosq]UUVVXXTSW]cYXUZWXWWVUUUWURTQUVSXYXTTUTSTVZWWUXUXXZZWZ[ZXWZ[]\\[\ZYVWXWWXYYZYXXYXXTROOPPQRQQQRQQQPPORTUUVVZXWUVUUUTRRRVWYYUVW\cfaVSWVUUVXQPVVVTVV[WWUUWVZZUVUTUUWb^TSRSQOSTSQQSRSTSPOLLMMNONOLPPVgz~rkuogi~eXVVW[l}sdY^XZdi\VTSSSTSTRUTUUSUUc]ZVUSUTWWUWWUTTUTTSSUWTXWWWUUSV\YX[URSSRRRQRTRUTRRVUXRUPSQRRRSSSSWWTSSSUY^\]VRU\]]c[\`ZZ\[ZZYZ\[[\]\\]]XXXWWZ\`npnnoe\\]^`ca__ca^\`a^^\Z\\Z]Z]Z\\_^][\[Y^\\\ZY\[YXXYZWWZVTXWWUXUYVYYXVXXXXWXXYXW[WXXVZXVYXXYYYXXZZ\ZXYXYYZ[YWYZXZXWYXXYZYYXYXXYXYZYXWTVVWWVUVUUVUUVVVXaqnqu^WVUVWWSQU`cXUUUWWUVVUUUVSRSQSPTYVVUTSRRSTVSTSSUVX[ZXW\Z[X[\]\\\\[YVVXWXXYYZYYYYXYSRMPOPQRRRQQSTQNPQQUSTTSVTTSVWUURQRRSUVVTTTZ\`^VTWVVUUVQPUTTTTURUXTUUTW^\YWUXWYbYRRRRRPQRSSQQUPTTPSONMNPRPNPPRWhtx}nfas¢n[VWWWZ]]\[[XTUX^aYSUTUSUTSTTVUURTWXVUTUUTRTUTUWWUTTTTQSRTTSWYVUTQSYUX\XVTTQQRQQSTTSSSTURQSRRSRPTUUTTWVSTTRRUYUVURV\m]]b\`]WZXWZYY][Y[Y[ZYWUWWVVZ]_jmlnnd\^_`bgeabgeb\_`]][ZZ[Z[^\\\\_a_]]^[[Z[YY[[YYZXXZXXYWXVWWVXVWWWVXXXVYXWWWXYYXXXYWYWXWWYXWXXWX[ZZYXXYXYYYZYZYYZXXYXXXW\XXZYZYXYZWXUXVUVWVWWTTVUUVWXcqloo_[WVTUUQRVb`WWVTTTVWWSVWYUSRSQRRVUWYSSTSTTSTTWVUXY[ZW]Y[]Y[Z\\Z]]]ZWVXXXYYYZYYYYXYPRNPNRQQSRPQRRPPPPSTUUSSTTTUWWUUUQRSRSTTSSQSUYZVUWWUUUURQTSSTTTRUUTSTPUbb`\]`]__VRRTSTTROQRRSTQSRSSQOOPPQRPPRTSWkr]_`lvnbZVYVUVXXXVVWVWXYVVWTUTURUPTVSSSXVRTTRSTTSSRTUUWUTRUUTTSTWUVUSRSQRSQTVW[VTVUSRSSRRRTUSSUSSTOQRQUTTTVYYVUUSRTTWWVUZ\^Yb`\\cUWXVZYXXYYXXZYWWXYXWV[^^fjkmmd\_abdjicdkhc]^_\][[[[Z[][[[[]^a_\]\Y[ZZ\[ZYYWWXXXWYWUWWWVWXWVXUXXWWWYWXWZVYZXYXXYYYYXYXXVUUXYZVZXYWXYZXZYWYXYYXWXYZX\X[YY[XWWWWXWWUVWWVWWUUVUTUWZdpswl``XVSVZWRS`]UUWUSUVTTVVVVVTTTSPTRTWVSRSUTUTWUTZ[ZYYZYY[\\ZX[Y]^\][YWWXZYZZZ[ZYYYXZQPPOQUTQRQSOPQQSSSSUUTTRSXSUWVSVSTQRQRSSTUTQOSWVVXVUUTSRQRSTTTTRUSRTTPT^^_`dh_d[SQQTUTSROQPRPQSQRRQRPNRSSRQRQSSRWdvkTUW`~dbd^YVWWWXXXWVWXXVWXWWUSSUSVSTUUTWURSSTSTSSTTSTTSTVQSXWUTRRSUUTRRTTTSSTTRRSUTVSTTWWUUUUSRSTRTQTQQRRUVUZYWTUTRTUWYYY[]ZUXZZ[Y_WUUWWXYYZ\[[ZYZYYYYX[^]`immld]acdfnmegokb^]^\\[[\[[[\[[Z[\]_]\\]XYXZ\Y[ZY\X\WWWYXVWXWWVWYWXXYXYUWXXYXWYWZXXWZYWZYXXXUVVWWYXYY[YWXZZYYXWXYXYXXYXYZZXYZW\XXWXXWXUVUWUYVWSUVVUVV]fpz~hY\YXSU^XRV^^TUVUUTVSSUTVXUTVUTQQRQUUTUTRSUWWUVWYXWYZWZ[\]ZYX[[`[YXUXZ\]YXXYXXZZYY[RROQOTURPQPPQSTYVURSUSSTVYVTTVVWUWXVTQTTTVTRQUYUVYVUUTRSRSTTTTSRRRSVUQTZ[]_cf_aZVRTWRQRQQSQQSPRPQPNMQNRTSRRPTQPSVZfvxgTSR[ljY[^ZVXYXW\`[WXZ\[YYYVUURRUVWUTVUX[UTRQRRRRSVSSSUTRTSTWXTTSSTTTTRTVVTTTVWUSUWWUSUSUYYWUTTTSSTTTTSRQTWXWX[WUUVVUUXXWVUSTTTUUUVUYUUTW[\]^_[[ZYYYZ[[]\aijhsi]]^\Z]irqgjsja_\][\[\\[[[[ZZ[[[]^\\\]XYY[\\\[WX[ZVVYZVYWVXWVWWWWWXXWWUWWYXYXYXXWWYYYZVVWWXVVWXYXZY[[XYZXYYZXYZZZWXYXWXZZXYYYYXYXVYWVWTUWWVVUXWVVWX_krxxdSWUUSTTUUWYcUXTWTTVTVUSUUSUXWURORTSSTVRSTVWXWWVXXXYZ[]\]^Z\[Z[^]\VYY^_ZWVYZXYZYY[^RPOPNSVSQPNPRST\ZSRQSTSSUWUTUVUWYXXYVUUSZXQRQRUQTWVTUURUUSUUTTSRRSUWVRSWZ_^ce`^ZWWY\VVRQRSROPRQPRQPQQPRPRQSOROQRUTUgh\TSQPVZSX]XW[Y\bqwd[X[`][ZYXUTTTSTWUVXZ[YSSRSTQUSUUSTRUTSUSTWTSSSVSUTVSTTUVVWX\[WRTUWVVRVWVTSSTUSRTUVTSUTSWX[[a^\ZVRUZeZTUTSSSSRSUVTZ\VTWXZ\]\\\\YYZZ]b`]k|dpeYYZXW[jpjilgba`\][\\][[\[ZZ[[[[]][\[]YZZ\\\[[XXZYVWYXWXWYVWWXZWUWXYXVUXUVXWWWYXWWZXXVWUVWWWWXXXYYZZVWXZZ[YZYZYY[WYYXXWYZZXXYZXWWUXWUWUUWUWXUWVTUV\hrrzr^WZ[ZWTSSUSYcVWUVXTSUWSSWVVUUVTRSSUUUVTVWTVUVXWXYXZ]_a__^^]^\][^^^][[^YWWY]YXZ[YWY\RPOPPQTSROOSPQSYYWQRQTSRRQSTTTVWVVVXWTRYYUPQQPRQSVUUUURUWTTVTUTSSTWYWSSW\^]cda^\]\_b[[RQRRQOQRQQQQSQPOQORORRTSSSPPS]_[VQOPQQQZaZVYYdf_`g`\Z\\UTTUUWVVY_b\XUSRSURVSYUTVSUTTUUWUSSSTVTTUUPVRTXUXY\[UVVWUUVRQVWRTSRWTRSUUSRSTSTY`ab^UXUTX_iZUWXVTRSRRTXSV]\VYXYZ]ZZW[^ZYX_hh_amxurl^]Y[\_gtjfbc`_]_^]]]^[\][ZZ[[[Z]\[[[^ZZ[]][Z[YYZYVXXWWWWXY[WWWWXWWXWVWVVWZVWZYXZYYXUXVUWYXWUXXXXYZYXXWXYZY\YZZYYZYYYWYWYXXWZ[YWYWWWUWUVTWUXSXSXXXdqtuxiWUY]XXTSSTTVa[VWXUVUTVSVWVVSUSSRRSTVUWWXXUVTWVZYXWZ]]__\][[]\\]^Z[][\[UYV`aWXY[[XYYRRQPPSTRQRSSOQQRWRRSQSQOTQSPRSVTUVTVXVVVYVRTPQQRUWSSVWUVWTTTTUUTTTUXZ\XW^^]ccbbb`aeg_[RRSRQPRRQQQQRPPOOOQRSQRTSPNORW\[WONMOOP[a\TTay²Èºª{po__YYTTWTVUV[^]XWVUUVWRTUVVVXUXUVUYZWUURUWTTTTTRRSYTXWYXW[YXQSUVURVWWVTZYUTTTTSQRSTVZ]`i^TVVV_iXWXVXSSURTVZXTZ`[[YXY^XWX]`Yaefdd^]cqkd\\\`b]ec_aeb^[`__]_\][Z[Z[\\\Z][ZZ]^[[\]\ZY[ZYZYWXXWWWWXYZWWWWWWXXWWWXWWXXWYYWYWYXXUXWYXVVVWYXXWYVXXWXYZZZZYYW[VYYYVZUZXXY[ZZWXXWXWUVWUXWVUYUWVZeqo{zfYWZ\]YWWTTTU``VWUVWTUVVUYTSUVVTQSTTVXYYZYWUUUWYXYXY^`a]Z[YZZZZZ\[Z]Z[[VVX]\[YZY\XZXTPSORRRRRQQQPPPQRSQTSSPQRQRRQRUYVUUUWXWWWUVVRSTRSUTTUXYZVVSTUYWVUTSRT[[Y]caojbfhdfkmd[RRRQPQRRRRQQRPPOOOQQQQQQRLROROUURLNLNMNSVSQUk¬ÏðïãÁg`]_XVTUUVWVVUVWUUUWUTVVTWVYUUWWWX[XUUTVSSTSSTRPSWTWUWXXZYWSTSVWVTXWVWYWVVUSTTSRSVXcihd\WX[[\ibZZZ[VTSRSZXXXY^`][Z\ZWYZ^bY`ghi_Z[ajm`cf`_beb[WX`ceb_^a^_^_Z][\[ZY]\Z[\[XY__\\^\[YX[[ZZXWXWVWWWXYYWWWWWWWWVVWXXXUVXXYYYXW[VWWWWUWVWZYXYZVWWXX[ZZ\[[ZXXYXYZWWXWXXYZZYYUUWWVVUUVWXVWXWVUXYcrq|{dada\[XUYUTTT\_WVWXSTWWRTXUUXVVQUSTUWWXZXZZWVWUTVZY]\\^]YZXY_^`_^\\[ZZ[WWVXZ\ZYYXXYYSQROPSSRSRQQQPPQRQQTSRSRRPRTOTSYVSTSRUWXZYXVTSSRTVWXX][Z[WQY[]\YXWTRRSUVTZi{qagmd`gdYSRSQQPRRRRQQQQPPOOPRQPQQQQMROQOSPNOMLNMOPQUR_v©Ïýÿÿä¾ nle^XVUWWTTSTWVUVQTTRTVXWUVWTUTVUUWUVUQURSUSRQPRWXVVXVVVXZYWWRTV[WSVVSYUYVTSTURUXYYchgdffdcea`\Z\\\ZWWTT_^]WV\c_[\\VVZY\^[_ggke]_\Y[Y_idmrnh[VZcebbb^a]^_^\YZ\\[W[[YZ[YXZ_`^\]\ZYX[\[YXWXWVWWWXYYWWWWWWWWVVWXXXUVXWXXXXWXZWVVXTUVWXWVYVWTUWXY[YXZ[ZXYZYZWYWY[WWZYYYXVZYXWWVVVVWVVVWVWVYastwx`m}c]XUUUSSRS_^VWWWTWWUUXUUXWUWQRRRVVWWWVWXXXVVTVZZ\_``[Y\Yb]__`_[[[ZZZXWYVWZZYYUY][QRRNRPSRSQQOOOPPRRPSRQRRQRRSQQRTSRTQRRTUVUUSRTWYYZXWXWTVYUVVW]^]Z[XXXVTSUWhshbiugVZWRRPROPPQQRSQRQQPPOPQRPPQPQPNRPPOQONONMNMORTcbn~¹äÿÿÿÿßÁªqpk`ZYXVSSRSTUWRSQRTSUVZZUTTVUUVWUUURQSSTUVUPTSWWYWWWUSSUWXUVSST[VTRSTSVXWWWYXUVWWUY`[\gikd`\]]YZ]ZYVTVV_`a_`Zab]]\XZ[WY^]\````]\WVW[]lgtfi^VZacceb_```^^]Y\]][Y[ZZ]YXZY[`^\[[[YXYXWXXXXWVXWWXXXWWWWWWWVUVWXXXVVXWXXXXWXYVVXZVVUXXVUXVVVUYX[[Z[ZZYXYZ[YWYWZ[YYZW[Y[VYVVXWVWVWWWUVVTUXXbrsu}gvxcYZWUUSSTU[^XXXTTUVXYXUWWVWURSSTVUYWUWWXWWVUSUYY[\\Z\Y]^\Z\\]\ZXZVWZYWWZZZ[Z\YW\YQQORPPSRRQQSQPQQNQRTRQQPRRSTQRPRTTTSTVPSVVTSTVX[[[YVZ\VTTUTTWY^b\Z\klqj`ca`bchppaYTSRSQPQNQPQQRQTRQSQPQRSPPQPQOORPPOPMNOOOOMPQS^`r­Óöÿÿÿÿøß²uoh`ZXVUSSQSSRTQQORRRTV^ZXUTUUY\VUVTTVRTTSURUUWVUXXSSVSRTUUVYWSSVZVVTTQXX[[YSXTSSTTV[Z\a[b`__^\WXZWWZWSV[_ddf\]ch[Z]^]WYca[[[\\Z\X^bemyo_a[[XWU^cedb_`a`]^_\\\[[Y[\[[YY[YY__]][[YWXYXXXXWXWVWXXWXXXWWWWWVUVWXXXVWWWWXXXWXXVWXYVVVWWWXXVWWYWX[Z]ZYYYZZY[ZYYYZYYXWY[YZWYVWVWWXUVWXUUUXWWZcop{zrtgc`]Z]WWXWX_^WXXTUVWYXUUWTVWTSTTUUWVXWVXXVVUUTWYVVYZ[ZZ]Z]Z^]^^YZ[XXYWXVWYYZZ[ZWVWQPPPQRSQOPTQSQQOPPRTRQQRRRSTRRQTTUVTVWTSSURVVUUZ[[YXZZVSSSXSU\a^[XRZr{wkjpneekum[USRSQRMPPQSQRRUSRORQPPQSQQQPQOPRQPONMNOPPONPPSZ_w¶Óñÿÿûùíâ£|i`\XUSSSQRQOQQQQORQPTXY[b`XWX\cifZUVRUTSSTRPURVWVVTUTQSRSTVUUVUTTURWUXXY\YTTRSTPSUVVTX^___^^]YRXYVXYUUVWXZ]b^Y`tg\]^]Y]hf[YZ[[[`jrvsuyw[XZVXWY^cdbba`a_^]^^\\\[Z[\Z\[[]XXZ`a^\YZZY[ZXVWWXUUWWYUXWVXWWXWVUVWXYXWWWVWXXXWXWVWYYVVWWWWWWVWVXYZX[[[Z\Z[ZYZZZZZZXXVXXYYWWWZUWXWWSZTXUWXXUX[dlnw~vrohcdbca[Y\Xd`UYVVVVZXXUTUUUUTTVTUUVYYXUVWTVUWTWXXWXZZXZZ[\\[]]_^ZYXXXVXZXZ[XWWVVWWOPPOQQQRRSROPQPPPRPRSROSPRSQQSRQSTVSXYSRPSOVWVXWYWVWUWTRSVVUX^b[WVYbnkc[Yluddjsl\USQQOQRPPRRRRSQQRORQQQPSSSRPPNMORROMNNPQPPNOOSUd|ÀÓìÿÿ÷óçÝ¨i`]ZWUUSSSPPPQRPPRQQURW\rpe^Xbwv_WXVUTTTSSQPPVVTSTTQPTQRUUVUVWWVSSTWZ[YXVRRRUXWVTURQV\`\WYWXYWVWVZVU[VXUU]^XWZbne`]\[\bd^XY_chntz|xttxfTZVVUV]_cb]^a^]`_]\Z[]\Z[\Z[[ZZXZX`a\_]ZZZYZZXXZVUVVVWXYVWWXXXWWXXWYZYXXWVVXXXWWVVXYYVVWWVVWWVWVXYYWZZZY[ZZXXYX[ZY[YYYYYXWUXYUXUXUWWUZUVXWWWWZffm}}wwqkhiiki^a\c]VWVTVWUYXUUUVWWVUTRRTWUWUWZUVTUXWXZVXW[[[YXZ[Z[]]_^ZYYVYVZ\W[ZZUWWXTUQQPPQSRQRRQPQQQQOOPRRPOOSQSQRSRQSVTSUUPTQRQSVQSRRSRUUTTRTYWTX_b\WWX^YWTUWgncdkwkXTSRPQQPPPOQROPPQPPPPROSRUTSOOOLNPQONNNNNPQONOSQi£ÆÓçÿûóíâÙ®i`^[YWVUWUSRRPORRSRSPSX[o|}q_b|w]VVTTUVTVVRTPUUUSVOSQVSSTUTWWXWVUTW[[XWTTRTUY\ZWTVTTVYXTUTSXYWUSXZTW`YXWU^YTXWbcf^]\[\_adg_cknsuxwroswn[YVWXVW\^^__\^`ef^[]]\[XYZY^\Z[\[Z]a`a]\ZZYZZYYVVWWVUWXXUXXYXXVXVWV[ZXYZYVVXYXWVUVXXYVVWWVVVWVVVXXXWYYZYZZZXXYX[YXYZYZWYXVVWWWVUWWUUWWUWXVVXXZegtuy{uppjlxwomeg^WVVTWVVVUTTUXXWVUTTVWVXYVWZXVWWZY[\\Y[^^ZXZZZZ\_]YWVYXXWVXZVWZXWWUWVYPRPOSSQTRTRPQRPQROORSQPSPQRSRSQRPSSTTTSUUSTTUTTPRSSUVXRTUYVUV[[YWTVURRTU[b_cnuwbWUUPQRPNPQPPOONOPQPOPPQRSVSQPPOLLMNONMNNNOQNNO[q|­ÍÓãÿ÷ïçàÔ³j`_\\YXX[WUSRPPRRSTSTSVUauptlYSUSTTVVVVTTRSVVRQSSQVSTSUWXYVXUY]]]YUWWVVVX[XUYUUVUXWTWWQV[XUTUWYVZ_URTWXVWUXY_``_\[b`_mpmfkmlikiilmxwcWUXYWXY]___[_flk^][[[\YZ[Z\[[\Z[Z]`b]\][ZXYXX[WXYWVVWWWWXWXXVWVWYXXXUZZXWVWXXWXUVYWYVWWWUVVWVVUWXWWYYYYZYZYYYX[YXYYYZWWXYVZWXWWWVXVUWWVVWVVXZcjrvkdtyungejursref^YXWSUWSWUUVVWWVVUUVUXVVXXXYWWVWYX]]Z\[^\Z[XXZ[]\\XX[[XVVVW[WWXVXVXYYZQPOPRSSOTQTPQSQQPQPSTQRSRQQRQRQRRUTRTWXTVWVVTSSSRQTTSSRSSWSVXXTTTSTUTUWYcg`fhno^UTTPSRORRMPPPPOPPOOOPQTSRSRORPMMKNMNMNNMNPOPPVq°ÃÐÝòøìâßÐ¹j``]^[[Z_YXTRQQRRSUSTSUU^rsmgZTVQTXUVXVTSSRSSSSRSVSTUTTVW[XYX[\XZXUTVWRSVXYVVXUVUUVUSXTRX]YY^W[[V\]USSVYWRTWT[^`db_`]_bcikccdbcfflspmf\X[\_fmkd^\\fsg_^\\[]\Z[[Z[ZZ[Z[\\_a_^\ZZ[[XYYXYXXXXXWWWWWXYXWYYZWXUXWXYXXXVWYXUVXXXVWWWUVVWWVUWWVWXXYXYYZYZZY[YXYYYZWXWXWYVWVVWWTUVVWVVVXXX\dopgahqtnijipka`tp`ZYZXUTUVXYVZWUXUTUVUWSXVUXWWWVVWWX]]\\[[XYY\X[[]ZX[ZY[YWVV[YYW\ZXYWZZYTSQQSQNQQURQTRTUQQOTVRPQRRRRPPOSUSQSSWVXVWVVUSSUVUSSQOPRTTUWUVSTTUUUUY_`cba``fdVTSSQRRQRPQQPQPOPNOPOOSUQRSSRQOONJOMMKONMNPPPSj­³²¸ÊÓÜâèá×ÔÈµ¡kab_a^]]c[YURRRSRSVTTSUU\p{ymhc\UWVTTVUVWUSTTSSSTTW]ZUVVVX]YWYWUWWXUTWXXTTUVVTUVVUTSTTTURUW]][\[^cY_YTSRUXWTUTSY^\`kc_[[XZb`[Y^`edghddlkffmqux{vj_alvj_][][Z][Z]Z[]ZZ[\[[]]aa^^[Y[ZXY\VYVXWXWUUWXXXXXXXXXXYXYXXXVVXVWYXXUVVXWWWWWUVVXVUWVVWXXXXXYZZZZY[ZYYYZZXXWXXYVWVVVVTUVVVVXXVWX[epxi_ksoijgmvh[Til^XYZYXURTWWWVWYWVTWYVTXVVYYWWWWVWWXZ[\\]ZW]\ZYY\\ZXZYZYYW[ZXYYX[XZZZY[YURQPROPPUOTQSUYTQRQSUWSQRRRRSQQRSRSSQQSWVXXV\[^_^VTQPPRUVUSUVSSVVVVW`jvndcbcgh_UTTSQQSPSQRRPPPNONQPOPUWTUUTRQONPLMNMLLNMNRNPUq¥³¼ÍæñíÒÎÔÌÊ¿j_^foi_`h^[VSSSSRUWUTSTUYnpnpgc_XTVUTSUTT\SYUUSTRUU[]XVUVTVUVUSRTUWUUWWYVQWVVTTVWZYUTTUVUVUVZ\]]c_i_XXSRQVWUUUUWXZZ\bkd[_Y\Y]XU\]_e_bbfkmq{xusoiclph^^\][[Z\\\[\[ZZZ\[Z\\]aa]_^Z[WXXYZ[YXWZVWUVWXYWXXXXXWXXWXXXVVXXWYWXZWWXVWXVVXWWXVWUXWVXWXXXYZ[ZZY[[YYZZZXXWWXYVWVVVUUUVVVVWWVWY_fptk]nqma^[gl]WS``[WWVWWSVXVUUSTYWUSXWZXUWWXYVXUUUVUWXY[Z[Z\]][Z[][ZX]YZYYXZ_\YXXXXXZ[YYZSPQSRQQSPSSQUUZURPRQU[TQORRRQQRRSTUSRVRTUXYYZdeaWUPOOQRUWVSSSTRWW[Vc~hehjkf[URQURQTWVORQQQQQQRPPOS[WVTSRSSPPPNONMNLKLOQNPUb£·×ùÿïØÔ×½»±yyq\\dsh_]jcZWUUUTSWXVTSTUWbeega^[TTUUTSTTTXSXUVWXUPY\XUSSSPQTTTSSTWZVVUTVSUWVUVUTZYYVWXXWVVUXXZ^cfddfVWTRTVVUVXYVWYZZ[cid_[\XYVW\]`a_addiquzqihe`akb]]\\[\[]]\[\YZZYZ[ZX]Z\_`_]\\YXXXXYXYXXWZ[XVWZYWWXXXWWWWWXYWWVXXWYXWYYWWWWZWVWWXYWUWXXVWWWXYXX[[[Z[\ZZZZZXXWWXYVWVWVUVUWWVVWWVWZ`iryn^nnnaXXX`WVUl^XUVUWYVWYWTSUUWWVVVTWVWUXVXWUUWRTTW[WWY[]\ZZXXZ\[XZZ[[X[XYY[YXXX[ZXY[ZZRSTTQQPRTRRQRSVRSPPRW[TTPRPSRRTRRUUUVWVUTVXY`b`ZUTRPRSSTVWUSTTUUZfq¦ldhgig[TTTRQPV[URPSQRRPQPMQOTRQRSRRQRPNMMMMLMMMMOOPMVa|£µÜÿÿíàææÎÆ·jfcYXaj`\Yc]\YVWTTUWXVVTTVUWZ\^[YWTTTUTSTSUUSWVXX]YT[]XTSRSSSTTTTRWWTVWUSRVSVTTYUYZXWUXYWVWXX\`bd`egbeXXVSVVVVWVUWWZYWW[bfb][ZZV[[ablc^]^e~styhikc`gk_^]^\^]\\][[Z[YZZ\YZYZ[X]a__\\]ZXYWW[XYXXXWXVYYYY[XXXXWWXWXYWXYXWWXYXWXXWYWYXUVYXXVVVVXWVUUWZYW\YZ[[ZYZZ[ZYYWWXYVWWWVVVUWWVVVWWX[amuq_nnj^WWX`XYZk]YWYVXWTXTXTTUVWXUUVWVVWWVTWVURVQUTXXXY\_]\\ZZ[[[XYX[YYY[ZTZXYYZW]ZY[[\\OQVRQQQQRQQRRRTSSSOUZWVPQSQSWVURTWVUVUTURU[^ac\VWUUUQUTUWWW\UUWXc¢¤¥¬¤jehegeWROSQPPRVSRPQPQQQMPNQOUQRQQQRQRQPNLLMMMNNKNNPRS]w¨½ÓÿÿòñþûìÝÁob^ZW[\Y[VX`ZWYTUUWWWVWUUZZWXXUUUTTTTUTSSSVUSVVYZb^X]^XTSRSSSTTUVSSTV[ZURTSSRSUVUVYXUUWVUYZ]]`flhagki^XUSRVUVYVYTWXXXWVY^aca_^]ZZ[__b^Z`bhw|qzfjpd^^\]\^^]\\[[]Z[ZZ[W[V]Y[\a``\[\[YYZXXYYXWWXXTWWYZZWXYXXYWXWXYWWYWWXWXWYWYUXWZUXWWWUXWVWXVUWVWWXZW[\ZZY[ZZZYYXXZYVWXXVVWUWWVVVVWX\dqyuaong\WWXaYZ^g\XVXYZSYTUTTVTWUVUW\[XXXVVTUWTVUTUVWYUZZ]\\^]\[]\ZYZZYYXYWWXY[\[XX[Y]]]ZRRUQRSOSOPRSRSVTRRPVXUPQSUTVSYVTVZUXUSTUSW`c_^ZRTU\TQTSW\WYZ\Z^\d¦´´±ygktmlaWTTNRRQORQQQQPPPOOPPOQTQQOPPPQPRPNMMMLLNLLOONMR[r¢ÂÓÿþûÿÿÿÿå³~igc]WYWW\Z\dXWXVU[VXUUTU\ba[[YVUUUTTTUUSSTWUSUW[_gb\__YTSSSSSTTUTTTUVZWUSTURSTVSSWRXY[XUVYbc_bjjd_]dh]WUTUUVWVYSSZYX\\VVY]`da_^]^]\^`\_bmp}{zvrzwt|nb`^\^]\]\\\\[YYZZXZXXZ\]]\```^^Z[YYXXYXYYXVXYVVWYSYWXWYXWXXWYYWZYWXXVVVWXXWYVYVXXVVVYYWUVUUWYWWYXXZ[\Z]ZY[WZWXVZWWXXWVWXVXXVVVVWX]iuxbomdZWWXbZ[bc[XVXYXSXTTTUWTVVUVV\\\_\YYVUXXVUVUVVVWXZZZ[^\\[_^[YXXYYXXVY[XZ^[[WZ^]_^\SQSVSRSQSQPRRRUURRRSSQOSSUTTVVUVSZYWZUWUXafgcZVRQSQQPQPX]YUZ^]igr«¹°vhpukg^VSQPOSQQSRRQQOPPNPPOQRQQQOPQNQORPONMMMMNNOQOLOQUhªÕæÿüÿÿÿÿ÷Ü­~ieaa]VUVYX[_YYVXWXZVSUTW\ca\[XWZWTSTTTTTTVVVTTX]dlf`a`YTSSSSSTTUSVUVVYVUTTURSUWRQUW\`_[\\cdheggeig_^b]VWWSUVWWVUVYVYXZZ[ZY^ffb`^]^_]]_^ewszvul}w~~d^`]\[\]_]\]][ZZW[Y[ZXX[[\Z^a^_][[YZXXVXYZYYZYWXVWWXXYXYYXXWYZXYYVVVXXWXXWWXXWWVYVWWWWUWTVUWUVXVWXXZZ\[[YYZYXWYWYWWVVWWXXUUWWWWVXY_ny{coiaZWWXc[\c`ZXUXYWTWTTTUVTUUUUWYZZ^]YYVWZWUXWVUVYUXYY[[YYW[`][XXW\ZXYY\]][][ZX^Z^\]\WVVVSQOTPRPQSRRQRQPQRRRRQRSSTTUTTUWXTXWY_fcc_XRQOPQQQQRX^VVVY]n ¡¨·¤k]_c_ZWSQRRQRORQQRPPORRQORRQQQRQQRQQRRTQOMMMKLLOQQNLMOQ]z¨ÝòõíÿÿÿÿäÆ©megh`XVVWXWWXWXYVVVTVVV[^]\YXWXXTTTTTSTRSUSVUW[bhhdcaZTTSSSSTTTTWVWVXVVUUURSUURQTVZ^]]ablmihhflofejmbYVUTTVVVWWYYXXXYUZYX\dcca`Zjrja`]fuqpvtp|l^^][]\\[]_\[[[Z[XX[ZX[XZ[\[[`_a]Z\YYZXXZZ[WYZZYZYWUXXWWXXZVWXXXVYWVXXXWYXXXWWWXWWVXYW\TXWXUVWWXWYXYYY[[ZYYYZ[VYZYYWYVWWXVVXXVXXVWYbq|epf^ZWWXd\]_\YWUXYVUVTTTUUTUUUUWXYY\[XXWWYWVWWVVVVXWY\^ZV[Z\]Z\[[X\[ZXX\\\][ZZZZ\\^\]XWVSTPSQSQSQRSRPPPQPRTPPQQRRRSWUSTSTVTW^edea`VRQRSUVUST\_VTWW_u¾» ¦ eXUVURRQPRRRRPQQPOQOPRRNONSSTNQQQRTSQQRROMNNLLLPPRNLMMPVq¡ÕôééÿÿÿùÞÇ²«wejk_WUWXXWVWXXWVWVWXWXVY\ZZVTWYSSRSSQRTSTVVVRX[`hneaYVUTTTTUTSVYWXVWWWVVVRSUSRQTUY]\[^_hjggghnknnlpaXWTTUUUUUVW\[XXWXY[WX_]_bb\~|rnpouuqy|rk`^^]\^\[_]]\[[]Z[Y[[YZZZ\[[[_]a\]]ZZZYWY[ZVYZYZYYZXWWXZ[YWWXVWXWVVXWXVWXWVXXWXWWVVXXXWUWVYVUVYWXZXXZY^\ZYZYWYWXYXWWYWXYXWUXWWXXWY\ft{fle\WWWXe^_[XXWTXYWUUTSTVUTUUUUVXXX[ZXXWVXWUWWXYZWXYX[\ZY[Z^\Y]Z\X\\YWXYZY\[ZZ\]\\[\]VVUTVRPRQRRPPQQQPTQPRQRQQQRRTVXWTUTUVVU_c`^[ZUQQSZYWWTV^^WTW[b{¨ÎÓº¢^TSRRRROPQRQSRQQPPQPPSSORQTSTORSPQQPQPSSOLMMMNNQQRQONONQj¤ÕðúÿÿÿüééáÖÝ´|ieh^XWWWXVVWYXWXXXWY[\[V[ZZUTSWTRRSSRTRSVVVVTW[X`hff\ZXVWTTVUTX[YYWWYXWWVRSTSSRTTW[[Y\\dgeeeflkmmif]UXYTXXWVVWWWWXYXX\ZXXXX[_cb~z{}yp}~t`a^]]]^^]_^[[\[ZX[[\ZYZ[ZZ[[Z``]]\[[[[X[Y\X[[ZYYY[YZXYZYXWVXXVXZWWWXWTYWVWWXVXXVWXYWWVVWXXWUWWVWXYZXXXZZX[ZZYVXYXXXXXVYYWVVWXYVUW[gt}s^^_YXYVT`a`]UWWTXZXVTTSTVUTUUUTVWWXZYWWVVXWUWWXXYWXYWXYWZ[Z][Y][Z[YZYXVZY]^[YYYY[ZYZ\UUTSUSQRQRRRQSPWTSPQPSRQRPQRV[ZVVZ^_\ZY^^]^XWTROVY[_`XZ^^VUX_e±ÎÎ¶vjXTUPSRTQPOPQTRQPPQRRRSSQQRTSQRQQOOTQROQPQNOMNPQOSQSUOLOPaÈëÿÿÿøÜãÿÿúðÇtja_]YXWYTVYYYWYXWVX^_ZYXYZWTTVTRVQTSSSUVUUTV\aZZa``[^YXUUSTTUUVXXXXZYXXWSTTSSRTSVZYXZY`dddcdjkmmid]VXXTW[ZUWVWUVXXXXZZXXXV[a`hyz~tuq`_^^^_`__\][Z\\X[[[[ZZYZYXZY[\^]]\[\]Y\[[ZZZ[YZZZZ[YWXXWZXWXWWYYWVXYXUYWXYXXWUYWUWXWXWUWVWWUVWWWXWYYVZZ[YY[ZXXYZYZYVVWXXZUYXWZVXX_nyfY_\Y[\XW`geXUYYUWXXWTUSUVUTUUUTVVVWXXWWVVWWUWWXXXWXYWXYWZ[Z][Z[[YX]Y^[^`debd`^]\]`da^TTSSUTSSRRRRQRPUSRRTOSSPRQRWW[ZWUW\bba`a`^_[TTUPXX__hb_a^W_ljg¬»®n]TRSRTTUQPSQQRQROPQRRRSTSQTSQPQQRPQRQQRNSRQPPPNSTPPPOONOPVu»íÿÿòäÎíÿÿôãÈ¡nd^[XXVWXZWWVU[[XY^^[YWWWVVSTTTUQRRWSVVTTSSX_]\^\\ZYXWVVUTWSWUVUVZ[ZWXXTTUUTSTSUYWVXV\abbabikmmib^XXXUXZYVXVWVX[XVZZZYY[[]]`n{v|{yqo{vwwlb^_`_^_]^]][ZZ\[Z][[\Z\[YY[YX]_]]\[\Z]ZZ[[ZYZY[[]YXXYXVVXYXWXXXVVWXYWVWWWYXWUWUYXUXWVWUWXXWUXWXYYYYZUYYYXZXZYYXYYWWYXXXVXYWWWXZYZcu{]XZYWZ^\WZegZUXVWWWSUTSUVTVUUUUTVUUVWWVVVUWWUWWWXXWXYWXYXZ[Z][Z[[YX\Z]adfgb^a`aaa]cni`STSSTUUSSSRRQRQTRRRSORRPQSS\VWW\YVV[_bb``_]YWTVYYXbbff[b_Zfutm¸²wqsgWSSSTUTPRQQQSORRPOQTQSSRSSSSSRQRQRQQRRORQRRTSSV]ZSQPMNLLONe²æáêÏÉÄëÿþòæÊ®¥udcb[ZXVXWWVXZcd__\ZYXVUTUVSTSSSRRTTRUVUUSXW\]\ZZWXVTUVUWTWTVQTSTZ[WWTVRRUTTSSSSUTUVTX^a`_`gkmmga^ZYXUYYYXYWXWZ]ZWZZZYXZ[]`eoxxxktyrow{w{vqolwvlca^^``^]]\][Z\Z\\[Z[Z][\ZZYYX[^]]]\\ZZ\Z[ZY[\Z\][\YYXWWWWWXXYXVWWXYWYXXWVWWVWXWXVVXWVVXXWUWWWXVWY[XXWWYVX[ZXYZX[YXVXYWXYXVVWWWXX^hy}X[XWUZ^XVWbe_[YYXWUUSUSSTSVSXTTTTTTVVVVVUUVWUWWWXWWXYWXYYZ[Z][[\\YX\[^_befb^\ZWZX[[jnbVVTSTVWTTSRRQRQSRQRSPRRQRSU]XWW[_WVTTWXYWTUWVVY\Z^_cehY^]W]l¦»¶q`c_VTSRUVTRSSQQTQTQRRQQQTTSTVSQTQRVSQRQQRQSSTSTUUVdmYQPNNNNNNZ¥½¬¢Éõ÷ùõàÊÁ¸nrsd^\_ZWVWW_ui``\WYXVTUWVTSSSRRTRQRSXVTVUVYY[YYXTSRTTUVWWVUSUVWZYWWYVSSUSTQSTUTRTVUX[[\^_flmmf__\YXVXXYY[XXY\`]Y[[ZYYZ[`glpt}teqrhkq{}xxtvvupjjd^^```_\\]\\\]\[Z[[\Y\ZYYZXX[[]^\\^^]\[[[ZZ[[\\ZXYYYWWWXYY[XWWXXWVXZXWWWUXXVWUWWWVWXXYXVWVYXVWYYZYVZZXXX[XZYVX[XWXVXUXXXXVWXXXX^hwxVZ[\TX[WUV`bYXYYYYVURSSRTTVVUSVUVUWUUTUVVUVWUWWWXVWXYWXYYZ[Z][\]\ZY\\_^aefb_\ZXZX[\eo\VTURRTSTRTRRQRRRQQRRQQRRSTW^ZWW[^ZYWX[[YWTYY_b]XZ`chfe[\[Wap¯±r`[a^VTRTVVTRRRQSSSSTRRRRQTVUURROSRRTTTTRQQRRQSSRPUXafXQQONOPPNPRXgw³åôøÿùëË¾ {sfa`]ZXX\cmf]YYVTUTUUXUURTTRRRSSRUVVWWZTWW]VZWTSRTRSSUVWWUUYWZVWW\SSTURSQTTSSTTUVYZZZ\ZX\^c`^`^ZXWWWY[\YY[^b_Z[[[ZZ[\coswt|ujsttuuyxnxrif`_^_^`\[]]]\[\]\\\[[[[XZYZYY[ZZ]\]^]\[ZY[[Z[\\YZYWXXXYX[YXWWWWYYXWXVVXUVUWTUVXVXVWU[VVWYUXXWVZXXYYYYYYW[[ZWXXYXXWXUVXWVXWWVXYZ^kx}rUY^[TUVYVV[]UZ\YVWUTSRSRUVXWWTVUWUYVUYRWWWVXYZ[YXVWYZWXYZZ[Z]\\^]ZY\]^\_eec_][YZY[^gk[VUTSRSSRTTTRSTTRPQRRRQRRSTY_\WW[]]][]_^\WUXY_`]ZXVYbc]YZ][\csybXaaZVWSTUSSRRPPRRSSSQTVSTUVRUTRNSQSQSTUSQRRRRRSSSW[cdTPOQURRPORQS\gbbq¸àëóóá±¢rvnhc^ZYZ[][YVVVSWRVTXTTSSTRRSSSTUUXY_YYVY]WXXUXXVTTSUXWTSUTTUVVUZWTVVRSSUUTSTRTWXY[\ZZZWX\^]]`XXWVWY]^ZZ]`eb\\\[Z[\]fv{zt{wouvvyz{rqqn{ymha_^]\_^]\^^\]\[\\]\Z[[YYYXYZZZX[Y\]\\[\YZ[[[[\[[YYXXWZWXUVUYVWYWVXWXXWYXVVUWWVVWXXWXWXWZWVXYXWXYZXWZYWXWYZY[XXWXXYVVXWVUWYWYYY^mx}jVWVWUWXXUVZWRY[XSSSSSRRTTTVVVWWTVWYYWYTWTWWYZWXXVUTVXYZZ[[[Z]]]_]ZY\]][^eec`^[[ZY[`ggZTWTUTVTTTVWUSUWTQQRQQQSTTU\a^XXZ\``_acb[WWXY_^[ZZYZaa]Y^]Z[^cozwi^Xea[]ZYVVSSRSQRURSUTRTUSWXSRTQRQQQSQRPRQSRRQRTSTUTW[b[UPPXTQORPQSSUUVer¶ÉÉÏÆ¬~{uyllf][YVUVVWQSUUUUUSSSRQRSVUTYZZ^]XWYXXYZYYYXV\YUWVRRUTTYYUV[XUUUQTRTTRTTVVWYXZ[[Z[YWY\^YZ[WYWXXYXXZ\bhe^]]\[\]^i~ztzytwxy}~vysooto{zl^^^_`Z\[\]]\\\\[[Z\[Y[ZWZYYY[ZYY]^\\[^\\[[[[\[[\ZYYVYXWYVVWUWXXVXWWXXWWVVVWXUUTXWXXXXWYXVYZWWWXWXYYXWXXYYZZYWXYWWXWYYYUYWXZZZaqxgUXWWVUVUUWZVSUUXXTRSUTSRTUUVVUWUTVY[XUVVUXZ[ZWWXVWWWX[[Z[\]]]\^`^[Z\\\Y\edca^\\ZZ[addZSVVTVRSSVVSSUTUSQPQQQQSTTTY_^YWW\ddcfh`YWXXY_]]Z\]\`_[\^\ZZ]]]ba\bfi`YV]WVVURRRTURTSRSSUUW]\USTRRRPRQPSSPQRSQRRRTWZVX`ec[UTTTQPRSUTQPSShx}¯¯®¡{{pf_ZZVWTSQUTTSURTRRQRUVUV^][\XXYXVUWWVTVUW[WUUVRUUZ[[XUW]ZTVSRTRSUTWWWVW[Z[ZYXXZ[Y\\Z[\Z[XXWXVZadbifaba[\]^_mzty{yyz}{rtmmwwq|~a_^__ZZ[^]__]^][Z[\\YYZZYYYWZ[ZZ\^[[]^[]YZY\\][[[YWVWXYXWXVWWTWYVXXWYWWWUWXWWWVXXYZWYYXXVXYWXXVXYYYYXWWXXYYZXXYYVXYYWXXZWXY[]bqwgVWWVWVTVVW[YRVRWWTRRSQSUTVUTTUVVUUVVUVVVV]_[ZXYZZYYX\^ZXXXZ]][^a]YXY[[X[edda_\]ZZ[`a`YSTUUSSWUUURVTXURRQSRQQSSQRTU[YVXXdiebb\XXZXZ___Z^`]_]]__[ZZ\\[`_]bfd^XV]XVVRRWVVVTVRRUSTVY^]ZXVUTQRPQPRORQQQQSSTYZ]_YYdib][WSSTRTUUSRRRarohw¡ {|ª§oc[YYUUTRUSTURTSSUTSTVZa^Y[][YYWWXSSTVTWVUTSUTTTTYWUUXZWTUSSURTUSUWYVW_\\\YZZ[\[[[YYYX[[YYZZ]hoib`^bZ\\cfeiyzty}|~xnnku{s}©e`^__[[[^]_^]\\[\Z\[ZYZZYXYXZ\ZYZ[\[Z\\]ZZ[\[^\\][YWWWZYVWYWZWYWWXWXVVVVUVXWWXVWXYXXYXYXVWYXWXWYWWYYYVXYXXYWXXXWYXYXWXVWXXX\ahtzp\YUTWWUVXY]WQTTTURTSRUTQTUTWTTUTUVUTTSUWUVXXZZZ\[^ZX][YXVWZ]^Z[[\^XZ[\\af_ei`]_Z[\]^\XSRSTUUWUSVSUUUSSTOTQTSTRPOORWVZ^\ee_`]YYZ]WW\`b[ad____b`ZZZ[ZZ^^_cf`ZXV[WVVVVWSSVVVRSSUVXYXYY\\\YSSSRRQQRPRRRUSRYW_fb]_ige]URRSSSUWRRRQTXnxua[akn °ºÑÇ«­·´°º¾§|c\[WWYVWRTUTSRWYWTVWSZ]Ze]_][Z[ZVSVVUTUTTTRUSQWTTRTUTUTTUSTWUTWXVYZWY]^]]X]^WXXXYYWXWWZZ[Y[`elkd_gg[]_igd`eptuquujis}~u~½ªia_`^\\[^]_^]\[[\Z\[ZZ[[YYYYZZYZYX\[[\]]Z\][\]^[\YWXXXWZYWYXXXXYXXWZVUWYVVXVVWVVVYWXZZYXWXXUVWYYWYVXVWYYYWYZXYYYXWXWWWWYZZZ]aivfXXVUTSUSTX\YTUSSUSUTTVWSSTQUSVUUTUUUTUVVUTUW[YWYZZWU[YY[WYY\^ZZ\\\YY[`db`_bla^`_\\Z[YXUSTUTUUUSTUTSUTURRURSQUQPRPSVU^^^gd_`[XW`gUV\_gY^e_[\afaYZZYXX\\`cb\WXVYWVVVVWTTVUTSSRRTWUWXW[]YYUTSRTSQRQRRRSQSTR_gd`\a]a[UUUTTTTTTTQQRSRYZ[ZWZe±ÊöÿÿõòëÙÄ´©eYXUWRWUWSXRPRUUTTTWVUUW\\[]bnh\VTUUUVTUUTUUQWXVVRSVVSWTTTSSRWYZYYY[`^\\^XV\[WWZZX]YUXZ[[\\`efgf_fge_`idgfeosuxrlqftw¨Ñªmb_`^]\\^]_^]\[[\[\[[[[ZXXXXXXX[ZXYZ]\][Y\]\\_\\[ZXXUYWXYXYZXWXWWXWWVVVXVXWTVVXXVZY\`_]ZYXYXWWWXWWXYUYXXZVY[XXZXXXYWVWYWXZ[^iw{^ZWYUQRPRSU\YWVTSTSTUVXXUUTRSSUTURUVTVVVTVUWXZZVXYXXWVZY[WWYY[\][\\YY^````_^c_\^_Z[ZZYYVUTUVUUVYYVTSSUTPRRQTPSQQRRQST^]\fec`]YU_dSTX`d]_fc]_hkc_[ZYWWZ[bd^YWXVWVVVVVWUUVUTTUTSUWXZWUWXXUSTURSRPRRRTRRTQSQTW[ZXZWXWTUUTTTTSRQPQQSQRTTZWXf¶åÿÿÿÿüòàÃ¦cWVVVUUXZUYSYVXTRUSVVXUVZ]ZWauwdUSUVVXWUTSTUTTVTVSQUSTSUTTRTSUXXYWX\^\YX[ZVTXUY]\_[[XY[[\[_`deaahmhd^`hdeosxxzwrlu{©À«qc`a^]]\^]_^]\[[\\\[[[[ZXXXXXWXZZXYZ\_]]][\]]`\[^Z[WXVVWYYXXVVYWVWVXXWWWWVVXUVXWY[\c_c`^ZWVXWUWWVYWXUZWWYVYZYXWYXYXWWWXZYZ[_l}~s[ZUXSRRRRTT_WVUSTRRVYYWUTUUURSVVSTTUUTWYWXXYZZZXXZYXXWZXZVXVYZ\[\\[WZ]^ab]\]\[[Z[XZYV\aXWTVX]YZ_]XVVUSSRRQQUPQQPSNPSU^`^heb_^WRSTPRUZcgbjeaekldd]YXWUUZ^_WVWXWVVVVVVWVVVUTUWVTVWY[XVWXZUSRWV[TRRRSTSRSRRQRVY[UXUWTSUTRTTUSSQPQPPQPRTWXW^q}¹èÿÿÿÿÜËÄ°vd\XWWVVTTWXYYVYRURUQVSX\[X\Z[[^`ZUVTUWXSUTTTUTUVWWUQSUTUSSSUTSTSUX[WVYZVUVYXUXYY]]Z[XZX]^^]]abc``eji`]ddcadisv|tr~ª«ªm]`a_^]^^_^]\[[\]\[[[[YXXXXXWXZZYZ[\^]]\\]]]^\[[[ZXYZUWX[WXXYXXXWYWVWXXWUWWXWXY]]eggeca[[YXXUVWWXWWVXWTWXXYXYXXZWVUXWWXZ[]bp}| _[^TVRSTRRVVcYSTVUSUUYWSSSSTSTTYXVUTUUSX\ZXWWWXYXVWXYYXYYUUTWXXY\\\YXX[\a``^][[YYXXYYZ`^V[\[Z^[\]ZYWTTTTTUURRRPPQNSPPU_ebij``]UROPRSTWbebje`cfhd`]YWXWY]`ZUVVVVWUUVWWXXWVUUVYXUVXY]ZWXX\VTRUTVTSRRQTTURRRSUXZXXVVVSRUUSWTWQQRPPPRQQSTUWW[w Êõÿÿ÷³i]XWYXVTUVTWZVVRRSRUSTSX[_X[Z\[WWUUWUSTUTTTRSUVVVUYWSTTUUUUSVSUVTSWZXVWXVVWWXVXZZ[\[Y[[\\]][``aa`abedZ^fc^[\^fjvslvÀÅo_a`_`\a^\\]][[\^\[[Z[YXXXXXWXZZY[Z\]]]\]^^]^\\[[YXZ[XXX[WY[YYVXWWXWWWYYYZXXXZ\^ddkokhc][[XUXWWVVXWWXWVXWUWWWZYXYTXWXVYZZ]ftvXXVVTRQRQUTSdWSSTTTTTWWURSSRSTWYVUTUTTSVXYXXWVVWUWVWVXWXYVUTVVVW]Z[WXY[]b^_^]ZYXXXXYYZ^YT`b\^[\X[WXSWURTUTSTTURPQRSRRY^^Yjh]^[RNPRSSRYac_baZ^d`[ab_YZVWXfadXVSVVWVUUWYXUVUVX[ZVWX[_\XXZ^VURTSRTTSTSUUWUTSVXWYYVTXTSSUTSWVUTRQOPPQQORTTTWWjÀëÿÿÙra\[YXXXWWYXWWUTSRTTUTSUWXZ]^]]ZVWVY[[YUUSQSSSTTSSWXUUVSWVTTSWWTSSVW[XVUVXVWWXWWX[][Z[[\___\abb_b```c^Ybh`[[Z[\_p~tt{£wlyÌÖla`^]``_]]Z]][][\]\\Z[YXXXXXWXZZZZZ\\]]]^__]^]][[YXYZXXXWWY]YWWZVVXWVXXZ[YXXY[\ahkntohe`^]YXTXVUVXVXWWXWXUWVWYZYWUWWWVZ[[_hw~bTVUSTTTSSSUVdXVTTTSVRVUVUQTTTTWYTTUTVSRTXYXUXTSWTVUXUVWWWTUTTUUVYZ[VWYYac^_^_ZZXWXXYXY^^W][[]YXSWU]YVSUVTVRSTSTRQPQQRZ`^]j^W[ZTPNPRRRW`f``[T[cbcihbY]ZW^eloVYTYWWVVVUXXUUTTVWXVVX]a^YY\`WSRSRRTUTWVWWYXWXYYYYXURWYTUYVTUTURPQQPPQORSSUUVZvÃèíÞ´wysdadiYVVXXY]]YWVTSTUUUTRUVUT]bhgd\]Y_^Y[[]XTUTSUUSTUSSRVVVRVTSUVTTVVYZTWWVWXWZ\]VXZ][XYZY]a`cddf_efaec]]hj`[Z\[\ft¥¯¦}wur{|´¿qb^`___\^^\[Y^^\^^[\Y\ZVXYYYWXZZYYZ\[]]^_`_^^^][[YXXYXXXXWX\XWWWXYXWUVWZ^YXXY[^bkz|zpifda][YWWWXWXWXWXXXXWVVXXYXXYXYWWW[\_kw}]UVTRRRTTRRUWaYUUSVSURWUTTTTTUTVWVUTTUVVUVXYWUWYXVTVXTTWVTSUVUTTUWUUUWY\a\]\[\ZZX[XXYWX[\Z^][ZVURSTZTWTTUTUTRRSTRPOQSRY`^^c]X^YWQQQQSTX]f\]XU_kmt}r`[b`[^]`\UUYZZWVXTRSWYZWVXXWXYZ[\[XZacXRRRQRTVWYXXY\[Z]][[YXTSVXTTXUTTUSSSTRSRUOSTUVWU`x®ÌÑ®hlumgipzoaWZXW]gbZUUUVVUTRRSUVTV_eifed__TWUVZZ\YVWWZZXVTSSTUVSSRTQRSTVWTZWVTWUXYY\bYYY\][XYYY\^egdedfgcbd[ajf\[Z^\]jyª}~}wxuohaabb_\]`]\\[\]\[^ZZ[ZYXZXYYXWWXXYZ\[^^_`a_^^_][[YXWYXXYXWX[XXXXXYXWUVW[_ZZ[Y^afny{nhda`^\ZWVXWUXVYVXWYXWUVWXXXYXXYYXWZZakx}tWVVTSSTSRSUTW^XSTSTTVVXZVSYWSTUWWTUVUUTTTVWWWWX\XUSWXSTVWSTTSTTUXVVYWWY\\\Z[WZ[W\]Z[[YYYYb`\WTSRRTUSURTRTUVTQSRRQROQRRY]^cc\Y[YWTRQPVWY]d_aX]gyzzd_`^]ZUVWWUWW\YW[TURY[_Y]^YWYYZ[XY]gnr\UTTTTTW[\[Z\^^bb`\[YWTTVWUTWUTTTSSSUVWUUTSUTUSZadvsu¦ªm_aaahilqi^YZjncXUTVTTTSRSTUSS\_bdcb]ZWVYTV\_Y]ZXZYVXXTSUTTSUSUUPTVUWWWVVYXVWW[Z[[Z]^\WYWUVX\afffgdffha\cjb]Z\]\\gtz}zponge```aa__^]]\Z[[[[]ZZ]YZZYYYXXWWXZXY[\\]]ab`_^`][[YXVXXXYXXXZXYXXYYYWVVW[]YY[Z`gou{wlfa`_a]XXYVXYXYYWYVYWWWVVVVXYWWXYXY\\elv|¢v[UUUXUSSVUTPU^YTUSRUWZZ\WWTWTWVXUWVXTSTUVVVUTUXYXVVVWVUWZSUUTUTSVY][WVWXYZYXZZZZ\_\^]Z[YW`XWTVRRRVWSX[UVXTSPRPPQNRPPQTYZ_hg[VXZYRSPRWXXZbd[^amvxyk`[[_XTWVTTTV\[_iXTT[\]X\XQWXXY\`gpyyeWWTURUX\^bhiabjhd^[YWUUUVTSVUTTTSSTVWVUTTSTSSQW\W`^[hkdeaZX]acvg[[aqw\TSTVSTSSUTTVX`a_dd^YXUWTTVZZTTXTUTSSWWSSSRTTSRRSSVUWWWZ^XZZVWY[Z\]_]XUVUSWV^cfimfdfdedacb^[ZYZ[[^ps{r{~pnlhe_ba_a^_^]][YZ\ZZ[[Z[X\ZYYZYVXZXZXXY]^\\`a`____\\YYVXXXYXXXYYYYYYZYXWWW[[XY[[bjrtzzrid_be_\\XXWWX[UXWXVXXYXYVWVWYWXXYZZZ\fnvkVSSTURUTXWTRV^XRSSQTUUZYWYVVTWWTUTWVTTUUVSTUSTVWVXYVUTTXYUVTTTTRUTXZYTUYZYVW[Z[\[Y[]YX[\W[UQTTSTPVZVZZWZZVTQPPOQORPSOUVYbf[]_]]^WQQSUWVVcf^abfgbcgqc[W]]WUWXYZWUX\evmXV[^^Y[TRRVXY`nyt]XXVXTXV]\dqudfdikd]ZWWWUUTSUUUTTSTUWXUUTTSTSSRW[W^\[Z^c[`fmb[[[\et~aZ^pz^SUUVTTRVSRVWZZZejc\YUVVRTVVUSTVTUTUSWUVVVSTTSTRSSSTTWZ__YYW[][\Z]`_ZUTTUVUX`efhhabgliggc][Z][[Z[bl¥¬¤{vmkkfbeab`a_`]\[[[[ZY[\^b^Y[ZYXVXYXXWYX\[\\\^_`_^_^\\[WWZUYZYYXYYZYZZZZYWWWZZXY[]elvtytmfa`cd`^]ZXXWXXXVXVXVXWYXWWWXVXYWXY[[_lv}hWTSTTTSYZXXVZ]XQRRRSUXXVVY^_\YTSSTUUUUTVWXTTTWVSSUXWUUVVUVUSTRTUUX[WTUUYXVVX[[[ZYYX[XZZ^]YSSUVTTRVZ^X][Y[[TRPPPQSURXYSV]fd`hbc_a`XQSTUXX\fkljlmjjgaXWV]YWUUY[\]X\^cpn\WZ\ZWTSNQRUZ]j¦w_VUY_\WZ[`kuyhc[ae`\b^^[YUSSUUVUTTTVXWTUTTSTSTSXZW\[ZY]`Z^cfi]XWV[ah«¢f[fdWVUTUUSTSVUTUVVX[_^XWUUUTTTTUQVWSSTSVXTTTVVUTTRSTTSTUVXZYWVY\b\\Z\[^VURUWWUU_fgieacfonhgb]YX[[Z\]ah~¦§®|qsoe`cb`_^_\]]][\[ZZ[Z`mfY\ZYYXYXXYVY[]\]]^``_b`^]]][XXYUYZXZZWX[Z[[[[YXWWYXWY[^gpysvnhc^adcb`_\YYXXXXVUUXYVXYXXWYUXXYYXWZZ_n}fXTSTXTXUYXYX]cXUTUSUVTUVUY^]YURSRVVRUTVYWWXUTUVTTVUTVVUVWXUSRRUX\XVUUWTVV[ZXYY\\YYZZY\\\[^WSVXTSSSWY\^[[`[TUQPPSYY\][YX_oxVWW\Z]`[TUVWYZZ]fkgeceoue[YV\UWUWY[[[Z_dhusaTTVUUURVPOTY]e¦´}`YW]fbWV[`irm`^_Z`\\nj_\\VUTVUVTSSUWYWTUTTSTTTTWYWZZYY]^Y\`cdYWWVZWU~¤¯¯_ZWVVWRVVSRTWSVVUUWXV[UUTTSTUSTVTUSSWSRVYRUUUTURUUTUTSVWVUUUVVZbg^]\YZ[VVVUVVSWbcjkfeihfged^ZWZY[\^`acr ÏÊ}vrrsqgb__b\\^\\[Z[\[ZX\mh\[YYXXXVWXWXZ[^Z]]``ac`]^^[[YXXXWYX[XWY[YZYZZZYXXXWWY[_iu}sphc`]beddc`][ZYXXXWVUXXVWXWWWWWUVXYXZZY]o|vc[TSZZXVSWWVY]cYYVWUSXQVVTWVVXTSTSSTUTUV[TXVVYUURTTRTVUTUUTSSUUW[UWTVRRUUXXZXUWYXZWYYYZ[\^bVUXTRUWW[cbYVYTRWaSOPPTV\]]\`ci`SRRSTSUWVZ\]]^]^ca\ZW_lpf]]^[X_]\[Y[ZW\brm\USTTVWVSRTVUZx©³sZUYfmmaVV^bff]^dbc_^ppa\`ZVTUUUVUSUXXUSUVTTTUUUVXWXYYX[[XZ]`_VWWVZWZ{jYVUUUUUUSTVVSUSVUZWWXTVTSTUSSTUTSTUUSTURUVTURTRWTXTUUVVYTTVVX\abca\X]^UWVSUVWXW[dgfjojeddb^YZ[]\]_b`clz§È¨y|¸¾zha`\_^]]\[\Z^ZZYXng]ZZ[ZZYVXXXX[[[Z]]a``_a^__[]YWYWUWXYZWY[[ZWZZ[[XXXWXY[al{sjb^]_cffeeb^\[ZYXXWVUXXVWXWWWWWVVWXZXZY_ls|o]WTUX[\^UXXVYbcZXXYV[UUUVVUWUUTTUTSSTTTWYVVUVYWSTRUUTTUTVWVWZ[YUTUTTURSTTTXVUWWYXWWXXYY[\ZeZUUTSX\\ach`SQTT[bUPRRQSUY][nqlbZTQQRTVX\\\]]ZYZZ\XXXZ_b\VX[^_`^\Z\]X^\]ugWSUVVVVSTSSV\x£©iTTUblroZV_`[``^bfg_[lthX[XUTTQUSUUWXVSSTVTSTUVUVXXWXYXXYWXZ[ZVVWVYW_sbXVUUTTUUUUUWWUSWVWVVURVSUUTTSSTUVTUTTUUUSTWTSSSRVUVUVWWVXVVWVW_baa\YYXTTVTUVVWVXZ_innkfjjb[[[[\\^^_demxzttÌøÇsa`_^]^]\]\][ZZZZji\[[[ZYXXXXZWY\YW]]`^_^c]]]][YWZWV[YXZXYZYZYZYZXXWYVXY\bvwia]ZZaehgggc_^\[YXXXWVWXVVXWWWXXWWXXYXZZ`gn{cYUUXWWXYXXWU[a\X[YXWSWYU[YUXUVUTTTUSUUTWVSRUSUUUUTTRVTVTTUYZ[XTTUTSSSRSVSVSVVXVYUWZX[ZXZYYdYTV[XW[XXbi^RSSU[_TSTQPROW`Xshf_[TSPSXVWWVURSRTVZXUWWWVTRUX]_\]ZVZ^]_]^rlZVZVWUVWYWSTYmlPSPT\m}^[ni][_[_faWXcmoeYXWRTRVRUVYXURUTVUSRTUSVWY[WWXXWVVWWUUVWVY\dxy||kZXVUUTTUUTTTVVTVXWUSTUTVRVSWUTRTVUUTUTUVUUUVUUVTSSTURUWXXUVWVXWX[aeb\XVUVUSTVWVVYXbdinnlrqj`[]^]]]\`cilvwqghdlxz¿ÿõ¬~fa___^\[Z[X[ZYYYZ\Z[\YWXWXXXXXY[ZY[Z^aaba^]\\[ZYYXXXYYYYYYZZ[\YYZXYVWWZ]ktfc\[Y\beggije``][YXXXWVWXVVXWWWXYXXXXYX[[ahqv`XTVXYXZ]YXUW`b\YZZWWYXYV]\]XVVSWSSWSUTUWWTUTUVTUSUUUTUXWTZZUURTTTUUTSRRSVTRUTWWWVWZWZ[X[\Z[SUW^]XSSUZYTRSRT\]TX[TRPR`dTeigdc`XRQRRSSRSSPSSQTYVWSTVUUR[]^ade\SV\_a``q~q{cY^a[UWU[^\XTVequvdQSRSYdk\^ga^_`__hmeb`huqd^XUVVXSUSUSTSWTTTTRRTTSTVVVYWXVXWVVTTVXWYaijkkkcZWVVUTSUUTTTUUSUVVTSTUUVTUUYWUTUUTSTVTSUVUVUUTUTTTTUSUTYSXTWVYXW[_bc\XVTUUTUVWZYYXefhmjompg^Z]\[[\boyuv§pjeegfput¥úÿÈea__^]\]ZYZZYXWYZZ[[\ZYZZWYXWXZ[ZYZ\]_`a`_^\][ZXZWYV[YVXZYZZ\\XWXVWYWXY^nnaaZ\X^bccbdgeb`^]ZYXYWWWXVUXWWXYZYXYYYY[\citq^WTUWWWX[XWVYb^WWXYXXZ\XZ\_^ZYVVZTTSURWWUWUXZUTUUTSSSUUVW[_VUUSWTUXVTSRUTUUTUTUWXWXWWUYZWY[X[^[_]VZZTYVSRRST\_bf_TPRWa_Taqieb^\UOSTRQTSQORQPSVUQOSVVV[djdjngXUR[cdbfmxiZmocdXW\\XVRR[fhf]UUSY^`e\^if`c\Wfswrrjkxyd\ZWWRSURTRSSVSSVSSRTTRTTSTUWWUVWUTTVY\\\_cb]Z[[ZWVVUTSUTSTSUUSUTUTSTUUUTTUXVUUVSTRURSTSUUTUSUUSSTUWWUUUXTUUWYWVXXZ^WXWUWVVVWUWYV[ehijclloe^[]^[\ZZ^bgkgct  © iehljoxpÙÿÎ}dbb^][\[[YYYYYXYXYZZZ[WXYYXYXYYYXYZ[^_^`a_^]\\\YZWYZZXZXYYZYYXWWWWTUXXZ`mtb`]Z\^_gcbbbeec``]ZYYZVXXXWUXXXXY[ZYYYYY\]dkwl\VSUVVVWYWVVY`\VVVWXYWWWW[`\[WRYVTTVTQSWTTSSSTUVTRRTVVUUY]XTVTRVVVVUTSSTTUTTUUUUVXXUWUVUVXW`YVY^YWTURZXTUVZ]aaljXOSUSXXU_ikb^`^WWOSPQSPORQQPSSQQORYXX_cigbifYYW]dljiks{rafwxtne][USTUVbpl`XVUSXYY_brymfb[enop{xqz}i][WVVTUTVUSRTRSWTPSRSTSSTVVWXVTSSVTXY]XZ\ab^WZYXXXWUTSUSSTSTTRSSUSSTUUTTTUWUUUVSTSUSSSTSRTSSUTTWUV[[VX\\WTWXZYWVVWXVVVTWUVUVTVYV\dhifimkk]][_][Z][]_^]`cbglqv§­yhcnwvw{w²Æ¡qbba^]]\[\ZWXXYYYXXZYYYWYWYWXWV[[WZXY\aaa`_^\\]\[ZXZYYXZXZWZZYWWXWWXXYXZ`cb`][Y^cipcefhdfed`]ZWWYYYYXVUUXYXZ\\ZYZYY\^enz~gZUSTUUUVWVUVY^ZVVVWWXWWWXZ\YWVVVVTVWUTSSSSRQTSTUSSSTVVUWZYVTTSQURUSUSRSSQTRVUTUVYYWUUUWWVXVX[XY\VVQTSY[[\[]_]Ye^ST[\WWWUWbic`b_\URQRROQONOQOSSQQRTWZZcjoulcf[[ccmrhbbda\ZfmomnqhYRQWW\px^XXVTZ[Yfw|ke\b^fluppomjd^[XWUTVSTSRSTQUSUTSSTSTSSSTVXWTRRUVXZXWX[jj[VXZWVWTRTTTSSTSTTRRSTSSTUTTTTUVUTUVTUTUTTUTSRTSSTUUTVVWXWX]^[YXWXYVXYVXXVUWWSVUTUWUU]aeiilmjf^_Z]]\Z[]\]]]igb`cfjtsf_^kysic__^^\[ZZYYZYXYYXZZYYXWVWYVWXXZYYYW[^_ab_`_\\[[\[ZYYYZYX[XXXXXWVUWUYYX]aca][[[alsslknnffcc^\[XYXXXYXXWXXYYZ]]Y[[\Z]`gq}{zbXTRTTTTUUUTVY\YVVVWWXWWWXZZXVVVVVWVXUTTRRRSVRTUSTSSTSTUZ[VSRSSRSSQVRRRTRSVWWTTUXXXWWVWVUWXW_ZX[[WVUX[_]_[Z_^^^ZTQYecWYVVW\_bba`ZXRTPRNROOOPOSROTWWV\cpvxqh__ajmf\Z]da\Vafdgovn^YXWU_oxv\SRRUY\atthc^^`jjd_\Za`_`XWSSVUSSRUUTURTWVUTRTQQUSWWUTTTUVWYYZYZfkVYVYYVVTUTRVRTSSRSTRTTSSTUTTTTUUTTUVUVVVUUWTSSTTTTTUTVVUUVXZ_\[[XXXXX[YZUVYUWSWWUUVTT^achhhji`\]]_]\[\]\]`\yoedfgigiekic_c}|~©iea__][\]YYZYYYYZYZ[ZXYWXWXWWX[[VXXVV\b_d_`a\\[\ZZYYYYYWYYXZWWVWUTVYZWZ]`a_\Z\_esy{|{tmbe]ZWXWYVXYVVXXXXZ\[[Z[Z[Z]aht{w]VTRTSSSTSTTVYZWVVVWVXWWWXZYWVVWWWVUWUTTSRUUUXTVSUPWVUQW[WVRQSRRTTRRSUUUTSWSVTRWX]ZXWVVWXXXXb_\[ZZ[__\_\]^aY[[^VQQPVYTZTT]dcjfbb^XUPQQMOROOPPQRPSSUSZbes}sd_afbZTX[b`XW_adnnto\nl]VX_igZSTWTVXiqhc^^`fg_Z^e_]`VWWYVTVUSVWZZVWZWUUUSSTSSVWUTUWVTW[\YY[ae[YYYVVVTQUTTTUSSUUUSRSSUUSSTUTUUTUUVVWWVVWWTSSUTUUTUUWWVUVXZ^[[\YZVWZ[\YUXWVVXVVWVWUVY^[[`djf`\\]\\[\\]]_`bscaa`ebeejia]bwzz}mj`^^\][YYXYZZXY[YY[ZXXXVWUYVX[XXYYVY\]_a`^`]\\[\YZZYYYXZYYXWWVZSWWVZW\]^_^\]]air|tida[XXZXXWXWYVWXWZZ[\YYXZ[_ajv~uZWTRRSRSSRSTVYXUVVVVVWWWWXZXVVVWWWVUWUUUTRUTTWTUVUVUVUSYZTXUTTSTTRSTRTUUUWYXVUVZ\[YVUUVXXWWX[c\YV\^]\\\X\`^^]\WZTRQSWWaYU\_Zchfb]YTPOONPNOJQQPRRRQQS\\cueXcmdYTSW]ZYYZY\cbd_]fYU\jk`WUSTUYj}zk_]VYbh`aaZY^VXTWWY`ZWWY][WVVUSTVTSTSSSTTWUSVSWXY[ZZ]a]XXXUTTTUUSTQVTSSVTWUTUUVRSSRTTUTVVVWXYWWZWTSTUUUTTUVXWWVVXZ][[ZYZWXZZZZYXXVYWUUUVVVVXY[ZXad_]][[[[\]\[]^`igdcaceackkggbeow|}wsc^`\^_Z[ZZYZY[Z\YX[XXXXWUWWVXXXYZXXXZba`_]^`]^\\VYZZXXYYWXXVXWXSXXYW[\\b^_\]\dls~zldc][[YXXVYVYXZXWXW\]ZYYY[^dkw|oYTRRRSQRPRRSVZWTVVWVUWWWWYYVUVVXXWVUWUVVTSUTTWTUVUVUUTSW[UUYUWUVTTSSSTSSVUWWXWYZZZYWTXUWVVWW]d][[[^]\ZYZ]\Y[[_XYTQSU^\i_WWbZ[gfb[ZUOQOMMNNMOQPQPQQPYeip{lXbsk``YUVVXXUZ`kol^d ~lfjywj^VTSTYo¢vvzj^ZWZcb\ZW\]\YWXX^cb^WWWXVTTSSUWUTTSSSQUSVTVRWV[\YXY[[XUTTTSUSUTUUXWURUSWUTVWUTTSSTTSTVUWWXYYUXWUTUVVUTTUWYXVVWYZ\[[YYZXY[ZYZYWWVYWVVUUUTVZZZ[]`\Y\_\][\][[Z[^^eqdccbfuxwsodrlejx~|}}zyc_^^^^[ZZXYWZ[[ZZZZYYYWXWVVVXYXXYYVW[_`b`]`_[]]\WY[ZYY[XXVVWVVWUXTW[Z]\]]_^\^ahs|tieca\\YXWXYWWWWXXXX][YXYY\`fsutqYVQSQSPQSSSQVWTRSSTTUWWWWZWUTVVXXWVTVUWVUSUTTVUUWVWUUTTXZUUXUVUUVUTVRUVWUUVUVYXVWVUUUWSSSVWU`e_]]Z[ZZZYYZYYY\\XTQQZc^\e`YX`_Yfd`]YSSOONLOPPONOQRRRRZnvv_S[ojpweTMQTU\ity\g°xwo_WRVUU`siowh^Y[Y[_[WWZ\[^[YV\X[ZUSUTSTSQTWTRSSSUTRUVVTURUWXX[WZXWWVRSUUVWUTVXXWUSTTSTTRTVTVSSTUTSVVYZWYYTVUWWXVWWUTUXZYVVWYZ[[ZYYZZ[\YY[ZWWWYWVVUUUTWZYXZ^a^d_``\`]^Z[[\\]__`aaasmiigmuy~~|kb`^]\ZX[ZWX[ZYZW[ZXYXYVVVVVXXWWWXWX\`b__]^^^]]\ZZ[ZWYZWYWWZWXXVWXXYY\\a\`^]^`jtwpida\\[ZWXZYWVXWXWX]]ZXYZ]bfs{|}hSSPRRSQQRTQPXVSSRRSSVWXWVXWTTVVYYWVTVUXWUTUSSVUVXVXVUTUXZUUWUVUUVUTVSUW_[[ZTSYXUSTSUUTTVSTTTbfa_]ZYXX[YYYYZYZYUSQRZ`ZU]`YWc`Zff`\XXQQPONNOPNPPRSRQRXjx[WZfj}fUPRX\gy_j¬ s[VTSTWSVYbjoqqg]aa]a\YXWZXVXX[\Z\XSSTVUSRURSUTRVWTTSRSUSSXXUUUTUYWWWXYWVVUUSTUVXXWWVXXTSTSSTRUWTUURVRUVWWYWXWUWUUVW][VXXTUXXYWUUXZZZ[YYYZ[\]YZ\ZWVXYXWVUUUTWZYY[`djphldaa_^[\[[\^^^]^^`ulgjpoy}|}²jabb^\\[[YXXZXY[YZYWXYUXUXVVWXXVWXYX\aa`^\]a[]]]Y\\\[[YWVVWVXXWVWWXXYZ^]^^\]]_ksykcb_]\ZYWYWUYVYYY[]]YXZ\]`gu~x`UTTTRRQRTSSSZXRRQTSSTVWVVVVVUWYWWXVTVVYXVTUSSUUWXWXVUTVXZVUWUUTUVUUVTVW^ZZYTVYVSSTSSTTVWTRTRehca]YWVV[YYYZ[ZYWSQRTZ_[X]b[X_^\ed_]U]\SPPLONPORPSUQORXbp||]TX_hzqXUTV[_hu~kqwy²Ã©]UVRSUTTSU^^ZZ]YXX^b^ZZVUWUVWXXXVUTRTVTUSSRUPUUXWUUSUVVTTXXVVVTWXYYVWTUVVVTTSUXXXYXVXYX[ZTSSTVTWSUSVQUUYYZWWWXXXYZY[]YYYUXTWVWTWVWYXYZXZZ]^^Y[][WVYYXWWVUVUX[ZZ]bhnpjnheecbb][\Y]^^]_`ags|s{wvsyxs}odcb^]]YXZYY\XZYZWZYXXXVUYWXYV[XXVXWZ^^]]]^_]\^\Z^\]ZYYXXYWZWWVVWWWYZY[^_`]\]bfvoeca]\ZYWWWUVWYYZ[]\YY\[\djw~qZX[XTRQQPRTSX_TSRQSSTUVWYXWUUWXXXWXUTXV[XVUVSSUVWYWYVUTVXZVUVUUTUVUUVUWX]ZZYTVXVSSTSSSTUVVUTTeg^XZYUTT\ZYY[\ZXTQRSVZ^\[`aZX_`___ZTTY\ZTPMPOPMQQUQORTV_efp{_SST]e_RUVX\cjt zt{ÃÎª}^XVQSTSTTXY\VVVTYXWYXX^]VWUVUSSUSSTUUSSRQRSTTTUWVSWSUVVSTUVVWVTV[\ZVVWVWTWVVTVTXWTWUYZYYXVUUUTVVSVSUVUUXYXWWX]bdcb```ZWXWWVUSTSXUYXVUZZW[]\^`]^\WVZZYXWVUVUX[Z\^dlrqmpljigfc__`\_^^^[__blqtvs¡zqkxsecb`^][[[Z[ZX[[YZYYYYWWWXXYYWWXWVWWZ_^]^^]_^]^\[Y]\ZXY[YYXZXXWVWWYXXYX[][\\`bgtukgd_[XXWXXWWXWYY[`YWY[Z^fq{h]X[`WSRRRQSTZ_TSSRSTVYZZYUUTUUX[WVXXXXZWVTTTTTSW^ZXZWUTVXZVUUUTTUVUVVVXY]ZZYTVXWTTTSSSSTUUTTUiZSRVQRUTUZWY\^[WRRSTXZ]]_a`YX`cbb]ZVVY[YWRPRPQOQRUQQQTTbe`neSQSX][VUW^`gp²·ª ·¦«°eXWUSTTRTTVW[YXUVWUVXVU\^YWVVUTSTRTVUUXVUSSRTSUVVWVWYYWWRUVTUVWVVXXXWUXWWUTSWUTUSUTUSWWYVVVVWWUTVXVUXVWVYVVYXX`oiehjkb\[ZZXTUTTUUUTTWUXZV]`[]]\[\[XXZZYXWVWVY\[]`fprqorpomkjeacd_a`ba]_aer£ljxoeda`_]YZYZWXYZZZYZYVWYVVYWZXXXWYXXZ^^_]^]]]]]\[[\^Y\XZXXWYXZXU[VYXVXYZ[\\]`ahv}|tlf``ZWVVWXXXYY[][XYYZ[aeozd\VXVTSRRQSSRZ\RQSTTUX^\XVVVUUWY\YVWYXXXWVTTTRTVZ][\WSUT[YZWVUVTTUVUVVWYZ\YZXTVXWTTTSSSSTUUTTU[XVUVXYVOTXY[]^[XRSTU[Z\^`b_XXaee`\[YXZZXXTSTRRRRSSRSSRSfeixw^ROSY`c`[Za_iwÉÍÇÊÓÆ¨¦mZUUTSTTSSRTX\ZXVVTYWYWZ\\\[b^WTUUVVVTWXTRURTSTXSSVTUXXTWVVVVUXTYZXXWVVVWUSSUVTTUURUTSSTXZUWVVVWVWYWWWUVVXWXZYW^kgba\bcea_^ZYYWVUVUVVUVVYWZ]Y[XXZ]\XZ]\ZZXVXY[]\_bhtsrrtttqomgdgibcefd_`civ}®§tlw¥Èyefcb_`[[Z[YZ[WZXYYYYYVUVXWWVVYWXXYX_^_]]^]]]^\\\\\Z\XYXXYZXWYWZYVYYX[]]]_]_bht{{}sjca^XXUWWYYYZZ\\XWZ[\ahsyg^TUSUSSSPRSS\WRSTUSUX\ZVVUWVZY[XXXW\VWWVTSSTVVUX]\WQSXTWTUUUWWVVVWVWVYZ[[YZXTVXXUUTSSSSTUUTTU[WTRT\b[NQTW]_aVVQSTV[X[_]c_WXbhc^Z\[ZZYYYWVWUTUTRSRSRUZ`Y^jwxeTRSPW_dc]V[_m«ÔÝåìæÖª|tpbYVSUQSSSUUTSUYZWYUVWX]`aX[]YgbYSTWURSUTTTTSVVWUUUPTRUTVVVXWVWYZY^b^ZXUWVUUVUVUTUWTSVUUSXWZR[XWWXVVWVUUTXYWXXXWX\ji`_\\`jfa^ZWYYWUTUUUVUVVWXZ[[XWYVYZ^__^^[ZZY\_]`gosuwyyurpifkmegjjhb`emv{~}£pp}·¿dedb`]\Y[\ZZ[]ZYZXYZYVVWWWYWXWVVXYX_]]]_\^^[]\\[\\[[ZXWYWXXWYZZWZXWXZZY^^__akvwyxpda[ZWWYUWWYYZX[ZWY[]ahsv}p]\SYUTVRSSUV_VPSWVTVWYVVWUUWXYY\Z[YWXUWQSRSU[\WY[VSTUUTVUTTVUWVVU[YWWY^\[YZXTVXXUUTSSSSSUUTTU^VPQRRSQQRQQXa]WQPVT[Xb_\Zc[U]geZ\Y]^][[[ZYYZWWVSRSSSRX[\W\eutqn`ROTOX^`]Z^ip}¹ÙåîøíØ£r`XWUVUTRTQSTVVUSVVTVVSUX[]b]XZaY]ZXTTSVTTTUSSSVZWWUUSQSSUSUUUWW\\]dhile^[YWUUTWTUWVTUVTTTUSXYWSXVWWTXVXVUVUV[\ZWXXVZdlheZZ^gga[\XXY[XUVXWUTVXVVYYYUXV[VX\``fpvvrd___dt®movsxxtrskiorilpnkdagouy{}y{|lu­µkhfdaa_\[[[ZYY[[ZXXWWWXXWVVWXYWVVWX]]]]][^]Y\[^\][[ZZXXXXWWYYZXYYWXYWYY^^`^bktx~vk`a\\Y[VXVXZZ[YXXZ[]bnrrz\XTWSUUURUSYaTRSWUTXZXVVWVVXXZ[_\\ZZYVUQWUTS\aa]VSSTVSRUUUTTTVUWUZVZWX^XWXYYXVXYVVTSSSSSUUTTUWUQSRTSRRQQQT\^UPQWVWX``WZVTV^gaX\Y\`YY_][\\]ZWUSRSTSUWWXUZ`khgh]SRTTZ`a_\\i{¹ÓßÝîðÕaVXSUTUQTQRTSTZZVTTTTSSTVYa`YYV\YWVWTTRTSVTVROTVXWUTSRRRSTVVVXWYb_cr|znhcZYYWVVVUWXTTUUUTTVUYYVUUUVVYVWWUVYXU`^WUVY]frtle]_df]^XVXY[YUVWZYVVWXWWWXVXY[Y[\afÅÄgdecÔìheqy{tqstlmrqpvsogbintwyyuv}vly|£¬}specaa^\[[\\[YYZYXWYXYYXWVWVYYWXVVX\]]]\\][[[]][\Z[[ZYXWXYXYZXXYYWWXYXY\]^_fhrvwzodd^[YYWWXXY[[ZXZX]`dqtxz\VTTRTSSSRUY\QTRXWXYYWUSTVWXX[\\Z]]]_[VUVWXVX][ZZVSRSTTSTVSVVWVUYZYYZX[WYXTWYXXVTTUVVTSSUUTTUTUOUVSUOSSTTSWYRNSWXVTZXWXUWX^g[ZZV^\YY\\[\YXXSTTRTUSSSTTSX[_`bb[UUUZ^__\Z]ds~°Í×ÝßçÊ|V[WTSSROPRRSQRZ[ZURUVSTRU_c\VXWY[\VWTWSUSTSSPPVTSUVSRVURUVYYY[XY_`bdonbXYXXWVUUTUVUUUUTTYVZWVUVUWYYXWVWUXTVZ[XXXYZdpqrvkgeb^[YYW[YVVWWW[VVUWYYXWWY[[Y\]dpãâþó vhnkÈð°l`ktstwnnefmrgddeinsvwuqryoqtx£~{recba^]\[\\ZYXXXXXWYXXXYWWUWYYWXXXZ]\\]^\[^Z]Z[\\\[ZYZWWYZZYYXXXYXX[YZ^a]`ddlrv|~tkg`\YYYWZ\[[ZWVXZY`lru~}e[VUTSSTUSVZXSTUTVYYXVSTVVYXXZ[\Z[^_]^^XWXX\ZYUW\WSQTTWUSRUYYWXYY[YYYYXV][YUYYZXUTSVWUSSUUTUUTRPVVSTRRUSTQQPQQUVVWTVYSSY[`a`W[[WW\ZXZ_[TRTSRVXSXZVQOQQRWWY[\\YWXZ]^_^ZX__kv}¯¸ÁÃ½¸vVWVSSTRTRPSSQRTWXURSVSTSX^ZWWWWZ^bc[YXWXTRRSRSRQSUWUUTWWX^hj`\[YZ\\ZhobZXYWYXUVXWVVWVTTWXVWWVUWXVY`Y[Z[YWXVWYZY\\^chklopmgcaYTUXWXRXUWXWWWXXWVWUVWZ]^[Z`cq±°{kqxyuaaÎ¼vuxriZ]`cgdjnmkntusptz}~yuilot|}secba^^\[\\ZYXXXXXWYXXXXVWWYXXWWY[^_^\]ZZ[\[[]\[Z[ZZ[[VZYZZXZXZZVXYZYY_`^`ckows|vph`^ZYYYW[Z[YXX\Z_dqs|{cXVSTTUUVVZ]WTVWWZYXXTQSTUXVVZZ[[[_chif]Z^^\WSUUWURQVTWWVWZZXWWYYXZXYYWVY\ZYWT[[YYRVVTTUUSUVUQQRTTSRPPSPUPOOQV[VWYZWXXZ^aa^YWYXU[WYS\^VRSPSRRSSTVTQOPROPRSVVVWY[[\]_\WVZ[cnq¦¨¢mTUVSSSRUSQRTQSPTUTTUQSQRWWVVVUVY_dga\ZYVTSSSRRRQRUTWRS[aksqeif[]^\dn}oh\[YW[YZ[XXWVXVVXWVWWWVXVYabegddcXXVXYZ]\Xa_gholhecefbYWWWVUSVTWVVWWZXWY[\]\_ca^]\[]apppytsqfwxa]e«éÀoosh^[[[[[^^flbakqmqt|||vlhkpyzrecca_^]\\\YXXXYYYXYYXXXVWXYXXXVZZ^`^\\\\\\[[^[\\[Z[\XZYXXYY\[YYZXXXXY^figfltqqz~thb^ZWWZZZ[Z\XY[]^fru}s[VUSRSUWVU]]WXXWWY\YWTTRUUXYWVX]\]_nvph`]baWUTVSVSTTXTUVVWWZYYXY[YXXXWVWYYYYWUVV[[VUVSUVWVUSRQQQSUTUUPRQRQSPV^aZW]\Y]_]YVUZ[YZXWXVTRYRTQRRSQPUVSPSRPQQQQPQSWWUZca\]_[UUUV[adot~eSSVSSRRTSQRTTTTRTSTVQTQPXUVSUUUV]_^\VUVUTUUSQRQQPRTSTV_pª¯{c`eic`emif_Z^XYX][XYVVWUVWUUXYX[aggnosyqdj`WY\Y^\a_bhnlsmrmlpf_YVVWWX[Y[^^ZZ[Y]W]daf`^_\agb\ajrnlupsheepudgÒÂnbbc^ZZ[^]XYY[`^^foqxs{vvogfcl{||qecda_^^\\\YXYYZYYYYZXXXWXYYXXXVYZ]^]\\Z[\]]\][ZZZ\[\YXYXZZZ[ZYXXWWYXY^eonmsqsy|}mb_][XXZZYYZ\XZ\[ajru|p[VVUXUUWV\a[STWXUVZZWVXUTVXVXWZ\]]bs{qgb][YYXTWUTTUWTUYWWUXXYY[[YWUWVUVUXZXYXSUUVWYUWTVWVVUTVSQQRSXWUTSRRQPQX\`[]\Y]^\[VUUWYXYWVYYYYWSSPTOTSTUURRTSQPPPONSWWUW^gbZ]b\UTURSTXZWcpqmn]RSVTTRRSSRSTTTTRSSTTUUUQVSRQSUWW[ZXVVUUTSVVUVTPRPQSRPXa}¬ÏàÓÂª¾pgr|pdaab^YYYYVYWWZYWWXUXXV[ZZX]dmuux|wfg`\`dage`^\`lmggllkmgd\[WZZYcb]fhe_ad^dlnfc_Y[X`pn`clpqtumqvsmszvfpeaa^\YY[\\\ZXXWWZ[^`fmkuvv{rie`\o}~zqjed`a^`]\]YYYY[ZZZZZXXXWXYYXXXVY[]\[ZZZZ[[[[\\\\[\\[YZXW[YZ[^ZYXWX[YY\gnpsrkoztm^\\ZYYWZYYZZZZ\aelqvy|o[UXXUYWVU_`WVWWZ[XYYTUV[VYVVX[\_^\aoxpdb[YYYXXXWWWWVTV[Y\XYX[X[\Y_[XYWWVWZXWWSTVUUUVYTWSXXWWVTRTTSSSQTVTSPUY^[[Z\Z]^W]l_[Z[_YZ]`]XYYVRTSQQRTUTPRQRQQNQPPPU\\``Z]^YXWUTVWRTTVXVSUVTVUQRTURRRRSSSTTUTSSSTTTTSRTRQQPVXX[YXWUWXXVY[\]WSSRQQQSWj¼îýõáåéÁ|zjf^\\ZXWXW^]W\_U\__dbcbfc_biw}zy{|um`\]aaf`^YYZ[gh`_heegjf``^``]cbac`][[]acfdd]de\^gtwflttqpnpxjye^ejd```\[^iaZZXVVUWZY_jf`ahmlupc`^]izuprnd```_`\Z][[ZY\[[[ZZZZYYXYYXXXWY[^_][\Z[[\\\\\\\[[ZY[[YXXYX[XW[U[WZXZYfkrrklw~od]\[ZZYYZYXZZZ\]`flsz|}uWVWXWXWWS_]YXYY[\Z[ZWX[[Z\YYZZZ[^YZgha`]Z\ZWWZ[[YXUTTX\Z]\\WZXX[Uc^VXXXXUUVWXTUSSSQTWYVSVYWXYYUWYSRQPRVSPSY\Z[ZX\__V\`k_[\af^_b\VTUUSQRSSPQRRQRORQRPROQTRRTZaa^_`_YUUVUVUSTVYTRTSRTRRSVUQRSRSSTTTUTSSSTTTTRSRQPPPUVVYYY[WXWX]`lqi\VURQQORT]ÁíÿëáøüËzlkf`Z]ZZ\X_cVX_[bhjed_]`gkuqxwsrqng_XWXX^_XXZY][`i_\d`fljjlgedd`[ZYWWYXVY[ZWWYYcppotqskmldoqmott}¡p]__bb^]`]pxm][ZXVVXXYembZ]cmorrllilryx{yttvpe__`_^]]_\[ZY[]Z\]\YZYYZYYXXXWY[^^\[\[[Z\\[\\\\[[ZY[ZYXXXXY[ZZXYVZXZ\dpvkjs}zpcY\ZZZY[XWZ\Z[\`diqx{{~mUWUWUVUVUfWTVXWZYWYYY[[[\[X[[[ZZY]_bZYZYV[Z\WX\ZXWTZ]^`_]\[ZXYY[W\YXXWUWWVVXZUVWTSRSSSXVWWVVUYWYWTRRQQSRRWb]X\[XZ_Y\bZWZV[_bZVTRQSRTSRPORQQPQRORPSSPOORQOPQU_]cda_\ZVTUUTTRUVVTTRUSTWWWSQRSSTVUTTVUTSSTTTSQQQPOPQTUUWWZ```ajziWRRRRQSSWs­ÕãÒÆè×«¢®{tmigci`Z[X`cY[dhikb[ZXYWY_fjcdjmlg_XVYXZ`a_^\\\YYZ\W\[ejhmtkgc_`_ZX[]ZYX[\VVVVW\chnnokd`\^upjowuwla]\^\^]_`ixd\XXWWYXVWYZ\fpz}torz}|rvypba``^^_]]]\\[Z\[\[]YZX[[\YXXYXY[^^\[\[[Z[[[\\\\[[ZY[ZYXXXXXZYYWWXXXZ[dttiou{wla[ZXYYYZYWZ[YY__nks{|}`UXVUUWYWXcVRUUSUXXWWUWXX[^\Z[\]\\be]ZZYWTZVTUVZYZXTVZX\_]][]^\[_]^\][\WX[T[Z[WXTUTRSTSTUVUTTSZYVRSQOTTZWWXf^[\[Z[XYa\TVXRZ`[PPOOQSPSRQNPPPPPOQSSPRUQOONQNNTRW[Z^^[ZVUTTSTVWVVVVVTRTPWWTQQRRTTUTSRSUUTSTUTSPOOONPQSTSVV\eiil}|og]SRPQSSa¯²§£®­§ofqrvhb`^cgoomkge\YVWZWVWZ_[[\dhaZ\X\_^[[cc][YX[XY\`eiouovidekswkbdhd^aaZWVWXXbgflljiga`_q¥pkgvnc_\]^[[YXY^dhqa[ZXUWYXXYVUZfny|smmt~y{zvjcb`]^]\\\[YZ[\[[Z][ZXZZ[YXXZYWZ^^\[\\ZY[[[\\\\[[ZY[ZYYYXXXYYYWWWWXY[bpmkrpw~zm_YXZZZZ[YYY\W[]dpmqy}ycXWVUUVXXY]`SSURSTWTXWVYUUUWYY^cdded`]][YWVYRWWYYWWUZUSTVXVUY\_[]^\YYZ\c^`WWZ[[XTVUXTTSTTTVWWVTX_`XSPTWZ]XZW\e^[\^[X_`YVUORWWSOQRORRRSQRPQRQPQQQQRQRTSPPQPNNRRUTUV]YaXRTUUY\[YWWXVSUWUSRTVSQQTRSSRPQ[XTSTTRPNONNNPRSRRTV]jrtw´¹³¨|rZSQQRSap{}¸Ò½vjuoc]_^ejgjlgb__]]ZW[YVVZ\^XWZ__[YWZb]_`ef]ZYY]`birsrttvqkegkvrsopoigg`XVUVYZ\`dlkedf`_`iypc__]]][\\ZW[^\`jrg][Y]W\XWWUVWWZ^fkljjmoqt|~}xia_^^`\[\[[[ZY[[[\[Z\]ZYZ[[XZXZ^^][\^[Y[[\]]\\[[[Y[ZYYYYXWXXXWWWWXY[amjjrrx~wj^[YYZZYYXX\ZX_`htnrv{h^\[WWT]b\]a^TTTSSTRVUVWXUUWZXZaeggfaa`^\[XWYTVW[XUUV[VVWUWWVYXXYZXUUVWZ[VYYZZY^YWTXTUUUSTZYX[ZV\jp`TRSVURQX\YY\\_eYZec\YSOPPQQQQROPQQTRRNROROPRQSSSRSTRNNPPOPRSTXTWWRSSTWWYY\a_[ZXWabXWYX_RUPPRPSSTQWUTRRTQNOOONNORRQQSW_p|£ÑÚË·«£bTSQRSamx{­ÂÁÕâÇ¯ wxtjc\[a_[`d^ZXZ\^ZZ\ZVWY[`[YXXXXVVVZZ`]aea]ZX]jqsxwvuvqqkgcjuurrqnebea\\YVXYXZ`dgjdk`\`_aktj_]cc_[[][[YZ\b^]]cka]aadfa[XVWVVVWWY[\dfeq}~}{i^]^][\Z\Z[[Z[ZZ[\[Z[[\[X[XYYZY\\][\\ZZ[Z\\[]\[[]Y[ZYYYYXWWXXWWVWXY[`jgirty~oh\YYXXXYXWYZXY^dqqoxtv~r`]af_\UYZW\`XSSSUUSRWUUUWWV]ZY^^`^^kfad`^ZWXXUVUWWU]_[YZVVS[VYWVZZVSTVUVTW\[ZZZ^UXWTUSSUWRVYVXXXbc`[TSQRRQPRYWQSUXZTZ\[\YOOQNQQPQPNPQRSROROOQONRPWSSSTTQPOPRPRRRSYVTTQSSUZWV]Z^Z^[Y\a`\_]TWWVSPSPSSSQSRTTROONOONOMQRQPRU]bp¶îûãÇ¿··¦jUSQRSbkvz®ÂÑÐâçÏ¸«{lg^^][[`_\XWXZ\]Z\[XXXYZ[[ZXUWVVTWW[^bc`a[X[istty~volecd^e`acba\]ad__[XZ]\[\]__^__]_\\\`[]^bcc[ZXXXWXXZ]^\atmadiljhb[YXWYUUXWVVY\Z_jklqvy{tmia^\]]\\\[Z[ZZXXY[\[[\[[[[[[WWZZ^\`\\[Z\Z\\\]\[[\[YZZZZZYXWWWWWWVWXX[^geiruz~~me[XXXXZWWZXYYZajqpvt|s``ed_``^^Z`]WRTUTUTTVUUTUYWZY^]\\XZddahc^Y[_[WUUUTUZ_ZZYWUZ[Z[WWUZXVUWUVVV\]XZ[ZWVWVTRSRPUVWUTX[_b]ZWTQRQPNUWRQPSWVWXWYZULLQRORQSPPPORUQNOSOQOOPRRURSRSQOSPQQRPQVXVSQRRUWaZT]cUV[USSWYY_]Y\]YUTSRQRRRRSUQTPOOMOMNPPRPQTZcgs£¼ðÿùÙÂËÐ»rVSQRS`hs©®ÃØààðìØÂ·¨zmieee]Z`[]ZZX[ZZ[\YXXXY[[ZWUTWWVUWTXZ\`\^^[\clplxm^`bc`]\_]^XZ\^`b_YXWYZZ[][\^^^]]]]^_^]`aa_\[ZZWUVWVVY][dvjaafijjlj^WVXVVXWUWWUWWeccdmkigea__^]^]\\ZZ[XZ[YX[ZYZY[Z\\ZXXZZ]`]\YZY[[]Z][\Z][ZZY[ZYZZZXWXWWWWVWWX[]dchrv{}~kbZXXWWYWWZXY[]cpurye]\WXVY[XXW`\VTTVUTUUTSRUWXWWY`]]X^_oqdda\[]\^XTUVTTVYZXUWY[\[[UUYZWUVWWXVV[]YYYXVUUUSVTQTVXWUTTUY_ZVYVTTSPQRRRQOTVTVY\\UQNORPRROPROQQSTOQPPPPPORQTRRQSQQQOORSQRQVWTRQPSSU_YTYWWWTRWSTVWXZ]^]\WUVTPQMNSRSOPPOMNONOPRRQSV]gq|¦½ÎòÿêÑÃÐÚÉjRQRRT_fqµ¼ÙëïïõñáËÂ´¥ynllle^Z^Z[[\ZZW\[\XYY[YZWWVTUWUVVVTVXZXXXZZ_c^cbwhY^gk`Z^_]]Z[]bdfcZWWWXW^\\[ZY^]\^^^\]b`aYXVXTXYXXZUV\Z]ike^_``iqrrm_VVWUWUYUWTXXcldelmmghda`]]]\[ZZ[[[X[ZXZZ\X[\[[ZYZYYZ]_\][Z[[[\\\\\\[\\ZYYZ[ZZZVVYYYVWVWXX[\abhsw||~{i`YXWWWYWWZYZ\^fnqpxsg`VRVRVTTUT^ZVWWSVTUXXXXWXXVX[Z]][grtsfYYYY\W]XVVWTSVXYXVXZZ][WUX[UVTYTUTXXZ^\YXWSSUTTUTSSVUXVUUVU^\VWZUUSPQPPOPNPQRRUWSOOOOOPRPQRPSONOORPMRPOPORVTRRQRTQNQNRRQRRUXVRQQQRQTSQUTVSQTTTWVUSTXUR\]XXXTPOMPPPOOPNNOONOPT^bc]ft¦ÌèðçÈ¸ÃÐáÆ`VSTRU\cz©ÂËïÿÿÿúöêÕÎÇ°xoosse`Z]YYZ[ZYV[ZYYYW[XYXVTVWWWVWWVTSVUWWY\]`c`]lwl\acflaYYXX[^afttogZXX\VY^[][Z[c_]]^\[[_^\YXWWYYYWYYXTYYbkk`XZ\\apwsnaXYWUUVWVWVWXbfY]\acdkhc^_\Z\[ZZZ[Y[Z[XZZX[X]YYYXXYZ[]][Z[[[[[[Y_\[]Y[[\ZZY\YZYWWXVVUTXXXX[\`aju}~{~~~~wg_XWWVWXWXZY[\`ilnowpd^VUUTVRTTUb\YWXSWTTUWW\YZZY]]XY\\foj`[WUWWUXWWUWWTUTVYWWWVWYYXWVXXVXXTVXYXXZ^YWVTUUTUUUTRSUVUY[XZ\^ZTWTUSRPPROONOQOPPPNNLORPQQPPQSPQNPQQPQQNPQOPUSSRPQSOQNRQQPPQ[XVQRSQQRRPPQQPPQSRTTTSSQRPOW\]][UPNONNMNMNONNNNMSb|~lkÄåèØ¸¤²ÉÖ¸kWSUTVV_|ÅçúÿÿÿÿÿûóßÚÛ¼wprzwe`Z[XXX[ZXVZYYXXVZWXWVUVVVVWXTSVUVWVX[Y[^\]Z\]ZZda`c]YWYZZageeonaWXYZ[WZ^\X[\^a^\_Y\^\[ZZYYXXXWWWVTWWYgle\X[Z[_myxma]Z]ZWYVWXWUXahYYWWZbmhe^^]][[YY[[YYYZWYYZ[ZYZXZYXZ\\]]^\YZ[[[[[\\\]Z\Y\X[XZZ[YWXXXWWWWXXXZ^_bmuzzvzte^WWVVWXXXZZ[]bjjknv{ma]VUUUVSTT[c^ZYXVVUUWUYZZ\]^\XXZ[Y[`]YXVTVVWWVWVVWWSYTZXWVVXYXYYY[ZXZZXXVYWYXY[WVWTVTTVUUSTVVWZ]\gfc]WTVa]QPTRQQOPONPSOMONPPQROQRNOQQQNNSPQPPPQPRPTSQQQPQOQROOPSSXWTSTRTQSSRPRRQRRQRSTPQSQPSQRU[[]\SPNNMMNNMLMMMMPUt¥¦¡°ÏÓÈ«¦­jTRSOTU\vÁúÿÿÿÿÿÿÿÿíÙÕ²wqu{f`ZZWVXZYWVYYXXWVYWWVUUVVVVVUUUVXVWXYZYXVWYX\_cZdc^\WUYY[\ge_clmcZXYYWYY]\YZ^W\\Y[YY^`][\\YVVWVUXXUTXXiia[X]]\co|rc^`_ejaWWWWVWX`cXVVWVafhf]]\\^[X[[ZZ[YXYZYYXXYYWZW\[\\]]\\[[[[[Y\^Z\[[\YZZZZYZXVXVWWWXXYXXY[_ciqrtzuv¢n`ZWWVVWXXXZZ\]dhhhluuj^\VUVVWUUU\a\YXXVVWYWWW[Zab^YXYYZXXXXWUTSUUWYYYVUWWUSUXXWXW[ZZYZZZZYXYZXYXXWTXZ\YWWWSUUTUWXXWXYZZloc]^Z^kfRPQSOTPPROOPPMPOPQQRORQPNOQPNPQPPRQOQQPRSTQQPPRRRQOPRRWXVUWTROSTTVQPRTVTRRQOPRRQRQNSUTRTTNLMNMLMMMMLLMMOVq¹ÉÈ®­¶«´¨¢¦weVSTTUWa}¿ñâáþÿÿÿÿÿöâ³qxta[ZYVUXZXVVXXYXWVXWVVUVVVVVVUUUVWVVX[[XXXWWY\^b_]_^ZXZUYYYd__edjf\WX[[[[[\ZZXUYVV[XZ\\\^]\YVVVUTWZWWY]gc`\[^[bfiri]Z]afpm_XWWWXW`gXTXWWagda[c]][\\[ZZ[ZZXY[YXZYXYXXZX[[^]][[Y\Z\\Y[]ZZ[Y[YY\XZZZYYWWVVWXXWYXY[\cnuv|{ssy}f_YTVUVWWWY[[]^fffekt|rg[[VUVWWVVV]_[YXXVWXXWVWZY]aZYXZ\XUWWVXUSTUTY\XXYWXWUXRWVZVY\ZZZY[[YXVVYZZYYXVWVZYVUWTVWUWWXWXVV\[h`\V_adnjWORQOPQOROMOOOPQPOROQRVPTNOOOOONOQPPPRRQRTRPQORRNORSRRZXVUUTQPPSWUSTUWXSQQQQQPPQRPRPUSQPROOMLMNPOMLLLLMOO`ÆíüøïçÒ×É¬¨vgWSSRT`{ÆØ¸Éâôÿÿÿÿÿùlhy~g\\]WXWXYXVVWXZXWVWWUUVVVVVVVUUUVWVVXZZWWWWY\aac^]`\ZWXY[YXXca`_c_[X[ZYZ[[ZYVWVWWVY[ZVZY\YYVWVUVVVVVX[\_]]\\[\hnlm^\[XZ_bhfa`_ZXWahZVXVW^bb_aa_]Z[[Y\YZYYXYYYXWZZYXYYYY[]\]Z[\[[Y[Y\\[[[[ZYYYXZZZ\YYXWWXUWZZYXY^frx|qrv zc^VXWVWVVXYZZ]agidbjsy{odXZVVWWXXVW`^ZYXYVWXWWVXZY]^YXWY[XVWXXVWSUVUVWYZZYWYZTVVUWV[YXZYY[[YWTVXXYXVVUVVVYVTUUUWZYXWXXVVZZcXWTWas~w_QPPPOPPPOOPPQPQQORPQQSQPONOQONPQPOOPPQRPSROOQPQQRSRTS[WWWVTRNRUWSPVXWWQRNRTQNOQQPQRRRQPPLOLNMMMMNLMLLOPOf¢ÙüÿÿÿÿñïäÉÈ®¯¾³£r\RTVVj±¾Áµ±·×ÿÿÿÿÿÿhhxv^Z[[ZZYVYYWXXYYXVVWWUUWVVVVVVUUVVWVVXYYVVWWZ\abc^]_][UWWWZYWiie]^Y\^[XVXZ[XXYYYXYW[YZXVYWUYWVTWUUWWWX[\[[\\\\`rzsf\X\V[Z[bqno{m\T^f\WYZW[`dcda`\]\[\YZYXZWYYYYWWYYYZZXZ\[]\]Z]Z\Y[Z[Y]\YYZYZZYYZYZYWWXYVWXZYXZ[]hv}wuwqb\WWTVWVWXZWZ^cgkfdmqmjjaUYVWXXXYWXd\ZXXYVXXVWVYZY\[YXWYZWVVWWVWVVVWVWZZZZZ[YVTVVUYYZXVXZV[WVUVX[YWUSUVVWYVTTUV[XYWXZVWUWYYUSRSWm|^SOOONPPONOPPPQQOPSQPPQOQNOPPPMOQRONPPQPQRQPROQRSSUTSR[YVVUUQRQRTRQSUXWSPQWSQPQPRQRPSRQSPKLLLMLONNLLLLNPOi­íÿÿÿÿõàÞÕÄÈÑ¹ÉÜÔ·w_VSTUs ¿ÕÉ³§¦ßÿÿÿÿÿÿ®slsjjh^YXYZYZWXXWY[ZXYXWYVUVVWVVWWVVVVVWVVWXYVVWXZ]acd_^_]ZUVVVYWUbookg][^ZUUWWXYZ[[[][ZZZYWVWVVVUWVUSWWXVW[]YZ\]^_i{~q][X\[]^_msu[_g\XZ]]Y\_df^]^\]\ZWZWZYZZZXWXYXXZYZYX[\]]\\]Y\\\Z^[\\ZYZXXYWXZZZ[XWXXWXVX[ZZZ_jv~v{~pb\VXUTWVWXXWZ_diifeni\[a^UYTVWWY[XYi[YXXYVXWVWUZZX[YXXWYYVVVWWVWVWWXWX\\\\ZYXYXXWW\ZZ[ZWZXZZXWVWZVWUSWWVWXWUVWXWYWYWXUVUZTUSURUR_quTOOONOPOOOPPQQQQQSRQPQPOOPQQOQPPQPORPOSRSTRRTRQQSSQSS\XVVUTSOQRSSTUUVTSSTVTRRPQSRQTQVUSPNNNMMMMMNKMLNKO\xÀÿÿÿÿûâÑÎÅ°Ãñá»¯ÉÐË¦x]UVWX½ÚóØ¦«ãÿÿÿÿÿþ»tmligbZYXZZYXXYXYYWXYXXZVTVVUTVUVXXXWWWWVWWXUUWXZ]add_^_]YUVVUXVU`kkhd]W[UWUVVY[\[[\ZZYXWXWXYVVTUVSWUVWUUWYZXXY\]bo}{h[[X\__bcxst~f_f\XXXVXY[eg`_^^\][XZXYZXXYWZXZVYXXWYY\]]]]\[Z[[\\[\[[Y[VXYXWYXYYWYZZYXYYY[Z[Z`mz||xl^YWUVVVVYWVX_^gjhfdncX]]Y[\ZWTUTTV[hYXXXZWYVVWU[ZXZXXWWYXVUVWWVWVXXYYZ^__aa^[[YYYVX]\YYYYWZWUXVUVUUTTUWWVUZZWYYWXZZYVWVQXUTTURRSVgurUNROMOPQOQPPRSSQRRPPPQNPNQROPPRQPQPQPOUQRRSTSQPRSPQRR]YVWXWPPQQPQPRSSSSTVYURQPRSRRSOTSPOMPLMLLNPMLOMLMOYÒÿÿÿÿþñâÞÝÐÝøè¾©¸·¦y]YWY^~½éé½®¾ßÿÿÿÿÿÿäµtnni\[YZXZXWZ\ZXWUWXXWXUSTUUVVXWXYXVVUVWWXXUUWYZ]aee`__\XUUVUWUU^gheb[XZUWUVX[^YYZWZZVUVWWWVUWWTUVXVXVUVZXXVWX[_egro^V[^\[]bs¥°{zv\eekogbdfebabdcbdggb\[XXYYVXWXWVWYXXZZXY[[[]][Y[YZYZ\[[[[YZWZVXYXYXXYXZXWVVY[[Z[[cm~¡uh\XWVUVVVYYYZ[`ghacfmaY`\X]b`YTUSSS\cXWYXWWXXYWU\ZXYXWWWYWUUVWWVWXZZ[Z[`bbghd_][ZYVX]\Y[^YVXXZXWTXVVVVTWVXXY[ZZ[YYXXXUUTTUVSSTRRRVZgiYQMNMOQMRPOQQSTSRPOOOOQQOPQPOPQQSTQSQQXRQOSSPOQRSQQSW\VSVWUOPPPOPOQRQRQQTWTTRPRQPPPPQRQPOOOMMOPOMNKLKMS_Ðÿÿÿÿÿûû÷ïèõëÂ§zqfZXWWYo¿¶}Áöÿÿÿÿÿÿå¼vjaZYXZYXWXYYYWVWWVVVVUTUVUWZXVWWUUUWVYWXUUTVXX\affa`_[WUUVTVUU\cdc`YYYUWVVXZ\XXYWYXWWRVVYVUWXXVYWUWWUYZVVVY^`bfac`WXY[]^^bwjgcWYZ`qrpty|qib]`fffdb^[YZYXYXWWWWVYVV[XYZZ[\\\[[\YZ[ZZY[[ZXZZYYXYZXYZYYYXWY[ZYYZZ[cq§±©£pb[WVUVVUUXXWW^bhhb`fog[aYW]a`WUVTSU^`VUWYYXXWZYUYVWVWWWWYWUUVWWVWZ[[\\]befmojc_\\YVY]\Y\^YWYXYYYVWUWSVWXVX[Z]\YXWWXVUTTTUWVSSTRRRVXbeYXZTNPQOQOOQONSQPPPPPOPQPQRQQQQRTUSRRQTNPOQPSOPRSQQSUYXSTUQNPSTQOOQRQNQPTSRPRPQQRTQQSSSTRPMNNSNMMKLKMOM]·ãÿÿÿÿÿÿÿùêûå°tgcZVURTWaoyjz­ÙýÿÿÿÿÿüÈr_[YXYWWYYXXWUYWVXUUTVUUVWWVVVVTWUSWSXYWZXUWXWXbjkjf\XVVVUVTUUUZ_a`^Z[YVWVVXYZWXXXYXVVRVVXVUWWWWWWVUVWWYVVW]hdecaa_ZYZ]bkgbbab]XVXYY^ooglrplh]Z^bdb[ca]]YXYXXWXWZXYWWXXWYYZ\[]Z[[[ZYXZYXYYXYXXYXXYYXYZXXXWWXZ[[\[]epz¥®ª¥}}sb[VVWUUUVXYZ\_djjeagnh`cYUZ][WWWTTVb^UVUYZYXWZVYZYTVXYVWWWVUVWWVX]\\]]^dhlsvpfa^]YWZ]\Z\^ZXZYYYYVWUWSUVW\X[\^\WUVVUTSRSTVWXRSTRRRUW^aZ`haQPPNPNOPMPRRRPQRQRPOOPQRTTQSUSROSQNPOQPPPOPRRSTPSTXXSRROSVVSQOOQPORRQUPORNRTSRSSSSUVTPNNNONOLNKJLKKd²ÑòÿÿÿÿÿÿÿÿÿçÂ¢}nb_]XVVUWX[[afhs©ÓóÿÿÿÿÿúËªe\[ZXXXYXWYYXVV[WUUUUXZVWYZXUVVVTSUUSYVYVWWXYZcea\ZVTTUUTSTUTUX\^^\\\XVWWVWYXVWXXYWVVSVVWVUWWWVVVVTXYXYYZ[ac]ffbgdd_Z]gqtf]WXXWYY^gini\``cb]Zcbbc`X^db]YYZXYXWYYVYVWVXVXXZ[[][Z[YYXYZYYYZ[ZYYZYYYYYWWZXXXYXZ[[]]]do|¡¤{wl_YWUXVUWWWYWZ`injecli^]f[VWYUTVTSTWeZUSRTUUVWWV[^ZUXXYVYUVWVUWUWZ\]^__`fkry}vjc_]YWZ]\Z\^[Z[ZYXYVXUWSUVV[XZ[\XUVUTTQSSTTUWURSTSSRTVZ]ZhujUQPNONOROPQQQOPRRQROPQPRSSUTRSSSRORRQQQPPQQQSTQRTTVYWUSRRTUSQQNOQOPOQNOOONQSRYTUSQTWSOMMMMOOLLLLMPN\t»Ú÷ÿÿÿÿÿÿÿÿÿæÀ³wa]][YUTUXZZZcjuºòÿÿÿÿÿ÷Õ©n^]^\ZXVXXVXWWWUUUUYWXYYYZZ]YUUUTTUUUVVVWVU[YYZ]]VUUSUSTTRUTTVVX_\Z_a^XWWXVWXVUWWYXWUUTVWWVUWWWVVUVTXZYZZ[]ahkihhiiilabhptl`[YVWYY_`bmj^\]ZY[Zgjc`]`gec^YYYXXXXXXWWWWVYWXXZZ]\YZYY[[[XZXX[[YWXYYXXXWYX[WWYYXX\Y]\`bp~~vm_VWUVUWXWWXX^lmojdgg[SW^[XUVRSTRUQXbWUSRPXVVWW[`_[XWYWVZWVWVXWVX[X[]\]^bgp|nea]YW[]\Z\^[[\[XXYVXVWTUVVZXY[[WUUUTTRSTRVVUVRSTTUTTUVY[pnYQOMNNPTRPPPPOPQRRVZZYYUSSVVSTVUQRXWTQPPMPSPRSQWWUWWZ\XSPRSRQRPQQOQOPPNNNPQURTUSTQRRQPNMNLKKKJJKKMORZq¢Óø÷ÿÿÿÿÿÿÿÿÿùðÅ}bc`\Y[[XWY[Z\ao¡ºéîëêÎÜÒ¨k_]^\[XVVXXXY\XXVSVY[XZZ\\\YZWVVUUSSUVUUXYXVWVV[YWTUSSRTTSSSSVYfl`Y]hhWSUVVXXUUWWZXVUUUVWWVUWWWUUUVUY[Z[[]\_eihhjligiacitsmc^YUXXWXX]ki_^[YZY[dfgakri\a_[XXXXXWXVWYXWUUWWYXZ\\Z[ZZ\[Y[XXZZYZZYXXXXYWXZWWWWXXXZ[^^`fl weYVWVVSVXWWYZdpoojejbUSSSZ]YZUTRVVV\gUUSTUVUZa`b_\XUWXWZXWUVXVYUVVXZXV[^^dnre`^[YX\]\[\^\\]\XXYVYVWTUWVYYXZYVUUUTUSTTSVVVWQSRUVTUTTU[b]ROMMNRVTPOOOOPQRSZeedf\UW[ZXVYVSW\_\USQPOOQRSVXXUWWY[_XQOPQQRRSPPQQQOONPPSWSUSSRUPPTSQNNLLMMLJJKLLPShÒõõÿÿÿÿÿÿÿÿÿÿÿíkgb][ZY\^[[[X^j|¥ªºÊ©¦mf^]]\ZXZ\[WWYXVWWUWZWVZ[^ZVWWVTVVVUTUTUVXWTUVVYWWSVSUQSTUTSRWZivhXZccUUUVUXVWTUX[YVUUVVXWVUWWWUUUVVZ\[\]\[^chghjjggicfnvnhf_XYZYYXYZlg^\Y[`_^aegfjiaZ]a[[WZXXWWXVWVWXWWWWXY\\XZXZYYYYXYYYXYYYWYWXXXYZZWYXZYVX]``_hjrs`YWVVWVVWXVX]gquonkj[TSRTYZWUTUTTY^cgTUUTTWWYie^Z__\YXXWWUUUWZ[XYUXUXVZ[[bhpf][[YXXVY][\__]^^]XXYVYVWTVXVXYWZXWVUVUVTUTTWWWXTTUUTTTSSUW\nmSSOOPQYWPOONOPPRT^powtcW[`^\XZWRV[\ZYTQPRQRRTXWUVUVXTYVRPORQUUQTSPQRPPQPPPSQRURRYRSOSRPNNLNMKLMMLNOQgºÜÿÿÿÿÿÿÿÿÿÿÿÿúºv`[[[Z`hcZYZ]`diqmojrjp~zpf^\]\Z^][XWWXXWWUVWXTW]\TUTUTSWXVUQVSUTWXUTVWYXUTWWWSUSSUUUXVYjlYXYUYZVVWXWVVXTYXVWWVVVWVVWWWUUUVW[]\]][[\`gghhifgjejqvnjhb\\\Z[XYYmj`]ZYab^`bhiea[\\_\[XYWYWXWXWWXWUVUVWXZZWWXZZZYVVXWYWYZWZZXZXXXYZXXYZZXY]_abfqzf[WVUUUTVUWVX[isulmkl[RSRUUUTSTTTVY^geTWVVTVWYde[X^][YYXWVWWVY[XZXYXVYYZ\[\\[WXXXWUUX[bffe__^\\\[YVZWWUWYVWYVYXWVUVUVVUUUWXYYWUSVVRQTSSU[`riYWSSTUcfVROOPPPRVb{jY_ec]Z[XRVZYYWSQPQQRSSVXWUSSUSV]RSQRURRRRSPSTRPOPOOPQOPSTTQRUTQQPOMMLMMMMNMPQ^rÇõÿÿÿÿÿÿÿÿÿÿòã×Äg^_\Y[b_\\[ZZ\^cksj__a^em~woc\YZW[YZYXWVWUVTUWVUW[YSUUVTVUVUTUQSUTUVVWVWZYX[YXZXUTVVWXWVXbfWXZUUXYWVWVWWTUWYWUWWWXUUVUVYXVVWX\^^_\ZZ[^ffgfgdgjhmsvoljea``^^Z[_ic]YaZdc]edgh`^\\\[^ZYWWYWXVXWWXVWUXWVXZYXXXZZY[YXVXYYXWXXYXZWYUZWXYYZZXZ\\_bhq}obYXVUVVWWVWXX^juwqkil_SRTYUUURQPRTU^if\[XXWWV\^cY\\XXWVWVVXXVXYZ[ZZYWZZXYXZYVVVVWWTUV]wztribemple`ZW\WVXZVVZUYXXVUVUWVUUVXXZZZUVSTRSVRUWcfc]WUSRW^lk[UPPQPQPUatq[cjd^\\YRVWZ_VSQQQRRRRTWVTRQTVW[TORSRSQRQQQPRRPOPOOPOPPRSSQTVVRRQRPMNLNNOOPPTX^u­åÿÿÿÿÿÿÿÿÿïÏÄÉµulb\ZY[ZZ\ZYYZ\bjgbbb^\]hmp~}rk_YXXVXZXWY\UUWWVTVYXWSSTUUTUTTTSTTUTUUVXXYZ[[XWY[Z]VXZSTVWWX`ZXYXUSXWVXWVUUVWZWXWZYWVXVVVSWVWTXZ\][XYZZ\efedfcgkjpsvonlheeebb]^fe_`]aZbcgldegecb_]]a]XZWYWZWYUXWVXUVXWXYYVZZY[ZZZWXYYYWYXXXVZWYXYYXZYY[Z\\[_`fszz}}~}}wh_XVVTVVVVWXX[fouyvkfgYSTY\[WTSTRTTS_a[Y[^[YWWX`]Vf]]YUVTTVZZVTVYXYYXXY]]XXYXUTWXUUUVZ]usqvysnb]XVUWWVYUVZWYWUWVXVUUWXY[[[VTVTSRURTZqm]XS^ZZjpd^\XUUUTTSXi|radrpd`_]ZRVZ_\TSQQRQQRRSVUSQPSTUVRQQSRQNTPPQQQPQQOPQORQPQRQQUTUURSSRPPPOOPPPPSV[]ÅÒÒæóî×ÆÑÞÀ®£¢eehd]^][Y[YZYZZ]cda`^YXY[\\d{pdZWV[VWY_`[UWUVUUTVWTSUVTTVVVTUTTVUWWWWVZ[\[XTWXZ]_]WSTVURVXWWVWUVRV\YUWYXVX[[^]Y[WXXVUVWWWXYZY[ZWXYYYZ`ffbebglmpsvppnkjkige_`gaacab[`dhkeikigdaa_ca\ZXXXXXXVWVYUWVWWWYYVY[Y[YWYYXYXWYXYXYWYV[U[XYYYYZY]\]_`dlsvtttx{wvwnf_ZXWWWVWVYXW\luw{wkh_SSTVW^_WVTUVSRa]VTV^caa`^_VTW[YURVTWUXWTVTX\ZXXXYZ\[XWVUVUWUTVWWZcg{¡·¿ytlaYVUWXWZXY\YZXV[XVXVVYYZ][\ZVSTSTVTU[{pec^__\cbcq^ZZZZZ[ZYcli[U_plXXZ[Z[UaeZSSRRQPOQQRUTRPPSSTRQQRRRQPSQQRQQQQRNNRPQSORRPPSTSSTVURRRQPONQPPXVY\e§¶´­§°¶¢ymb]]]^\[^[]ZYXXZY[\\\\[ZXX[XX`s{xxmtn_XWWUV\_WTVUTUTUXTTTUUXYWVWVSVVVXWUYWZ[[]WV[ZW\`^[XUUTUUUSUUUVTTWV\UWYZXXX[\]]ZXWXWU[\WXZ^a]WZ[]^^adffeeddbfoposwqrqoopnkibccccfec[`dljgmomkhddcfc_\ZYXXXZWUXTUVSWWVXXWYXXXY[XWXYWWWWWYXWWYWYXYYYWYZZ\[^^`cimmmprssnqnha^\[UUWVWUWXZapsxzro_SSRTVX[ZUWUWUUadUSUTUW]bb]XWVWSTSUUUUUXWWWXWVZWVZ`da[VTSSSTUTWY]c© ¸Å¾£zp`XWVWZZZZXY[YWWXVXZWXXYZ[\]YTUVVWWUUUdu^]^_Z`i\]afg\YXTSVTYac[RVahaTTUTVTSWXQPRRPQONQQQUSQPPRQRQRTSRRQRSRRQQQQQQQQQPPPRRQORPRRQUVUSSTQPPRQRTWWX[Z^go{¢~k^YZZZ\[WYY]ZXYX]X`^][ZXXXYYVV^kxyrmt{p^WXVVW]YWUTTSSXXTUVUX\[VVUSTWZXXWUZ\]][\VTTZX]_ZYWWWVTUWTSTVVTUVW\XXXYYUXZ]YWXXWYZXXXZZ]ah`X\]ffkkkggfdaehgkoqrqrutprvspmefeefiid\`hmiiqtrofgggifc`YXXXXYWXYWWVWWXWWWYVWYXYWWXXXWXWWYYXWWYZYXXXW[XZZ[[]]^afdgjmopppqlf`\WXVVVWUXXX[erwyxwuo]SRSWVTVURTVWUUe^RTSQVTTW[[ZZXURSTTUTTXVZWVVVUVTV[fd_XUSSTSUWWZ]dx°¯µ·¤³È¿¦¡saZXYXXWVVWYYVZZXXYZWWX[\[\ZWXXVVTTTRTYVRY_cdyo|lXXTRVSU[^ZY\`]WUTSPROQOPPSOQOPOOQSTXUPPPRPQRTWTRRQRSSTQQQQQQQQQPPPRQQQQORRQTSUTRQPOOPRQRW\ZWY\]cgiy|ng_XVXY\ZX[[ZYWZY]^^][ZZZX[ZYVV[jurtxsstl[TXUW^UWUTUUUUUSUTVZ][WUUUWXZXVXXZ\]^\[ZWYYYYVUUWWWTTUSRTUUXWUWZ^[ZZZZYXXZXXYWY[[YY[\^bacb_cdklffhgcfa`bknkptsoptrmpsrqwkglhimne]dlmhkuxvmgjkklif^YXXXXYWXXWWVWWWWUUXWWZZXYVXYWXYXXWWVVVVWYXXXV\WZ][Z\_\_dbfgjnmkmkhb\[XWWWXXVWVZ\lv|vsqoo`SRRUVUUTRTWVUTc[VTSQYYSTTUTVWVWVVUVUVVTXUWSPRSTU_c[XUTSSTRUWXcq§ÁÇÒÍ¦§¯º¶µ­m\WXYZYZZXXWYWZZYXWZXYU[^Z`^bZWTUUSSSSTRSV]ft°Ïÿ³eZWUUTSS[_iaXVVURRQQPOPPPPOQNORQPQVZVQQPQPPQW[URRQRSTSQQQQQQQQQQQPRQQQQPRRRSRUSRPOOOPORVU^]YZZ[Z[_ebovhab[YXXXZZZ[XXZXXZWZ]YWY[ZYXXWWXZafbjvvsnmg^VTVVWUVSUUVQVUUSX\]ZVVVVXYYWX]dh_\^\\Z][\ZTUTVTUVUUTWTTTWZXWZ\\Z[WZ]ZYXXWWWXZZ[[XZ_abbc`ajlmpgchebe_cgkkjqssidlgbffnuthmrnmlleblpmhmz}tkkmnoole]YXYXXYWXXWWVWXWWUUWVWXYVXZVXZXYXYXXWVWWVXYXYWWVZ[[\Z_^`eaddgfhfdcd^ZYZXWWXXUYW\dsz{skjr_SRRTUUUTTUYXSYg^USTTTYRSSSTSRWZXYXVVWVVVVTRSRRSTY]VWRRSTUUUVYr¯ª©ÅÛÃ¤¬± |`YZXXXY[[[YWYXWYXZXXZXX\[[`a[XVUUVTTSTTSTTW_x²úÿÿ÷±{aVSTRSQV[^WSUUSRQQRPOPROOOPOQSRQTUVTSQQQQQRS[YSSSUSVSQRQQQQPQQRQPRRRQRRRRRRQSRRPOOPPOPQT[]ZUXYYX`dfhnf``a[WWVWYXYYXYXYZYY]^YYY[VYXXWVXY_ejlproghmg^WUVTYUTTUVVSURTYZXTTUUWXWVWY_kh]]\^\[[[^]UUTVVRUVTUWSSUX\XXY[[ZXWZ[YWVWWVXXZYXYZ[bb`aa^cnqoiff`ead`lfkwqpij^\`^\^]bmqiszyzvpmksuthhrjbioqrsskc[YXYXXYWXXWWWWXXWUUVVWXXVWXVWXYW\UWVYYVVZWXYXXXYXY[[\^`bcdbbdagbec`]ZXWXWVVXXXZ]jy~~umknnZTQQVVVWURUWVT\e]VUVTTTQUQVUQTUXWVZYXUXWWWUQRSRSSURRTSQSSSVV]a}£ÀÇÁÌÑ³¤zeogZ[[WZU\^][YXXXXXXYXYZXY^YY_a]XUUWTURTTTTUVU[káÿÿÿì§lXVTSTTWRTWVRQRRRRQPQRQQRRQRSRSRPRQPQPOSPRROQ\WSRRRURQQQRQQPQRSQPRSSQRRRRRRQRQRPOPPPPPQTVYVUXZ\`coyvmb\[Z\Y[]\a_\\YYXY^_ahg\Z[YXZYXWTVZesxspqjfkle^YWWVVUSUTVTVTTUXWSWVVWVXXYZ[^`_\[^^\Z\Z\`XTSTTRVUUUVTTVXYWWVYZYWWXXYZXYZVYYZXTXW\]bagechsrngaedbgeaintrpodZ\ca[Z__^bjnu{xrwyyuv}olhldisroojefbYYXZXXYWXXWWWWYWWUUVVWXXVWVVWXYV[UVVXVTYWXXXYXWXZZY[]^abddca``accb_]YYYVXWVXXXZcq||ymhhpkVQORUSWVUSUWWU]aXRVVTURTYSTSSUXWYZ[VXWWXW[XSRSRRSQRRQSRSUTY^e´Úñþõ÷ç·udgob_\YXYX[^YZYWWWWWXYZZZ[[[WW__ZUUUVVVTTSRUWRVW`k¨ØíÿÿÐshWTSUUTTWXSUTVPRQSPROOPSSSSRQQPQPRSUOPRQSPPRS[XQOQRPQSRRQPQQRSQQSTTRSRRRRRQQQRQPPQQQQRTVWUUVXY]bore_WWZX\adjikxmaZYagp|td`^XXZWWWXWZkjuqlheae_[ZXYZVWVTTSVUTVSSWVUVX[XX[\Y\]a\[^^\_^[][[aZSSSRUSVQSTTUVUVTXU\[XWXY[ad`]Z[]_\]^[X`__`gdegnmolbbeeffenqnnspmb_peZ_iyxhptsuwy}|yx|tppqq}{lndebb^YYYYYYYWXXXWWWYVWUUVVWXWWVVVWXYVZVVVWUTYWWWWVVVZWYZ[\^aa`bcba`]_a_]YZXXZXWXWXZYhv{{skhmpdRRQQVUWUVSWWWU^`YQUUUUSTWWVTTUXTX[[VWVVZSUVTSRQPRRQQRSUSSUW`s°èÿÿÿÿÿüÓÃ´¡ztod`\YY\ZWZ]YYZZ[Y[YWXY[[Z\[XY\WWVTUXVUUUTSSUUTV\_r«ìÞqyt\STSUUUUUUW\YSSRRRRPSWWSSSSQRSRQSVVSPRTQPQSSQZRRNRQRQQQPPPOQQPORSRSRQRRRRQPQRQPQQQQRRTVVTUUVV[^huvka\WVYW\hhceq|onmigpjaa[WYXVWXYYYbg]^]^[ZYXWXWX[XXWTTUTSUXXTUTUTVYZ[]Y[^`eaaa`__]YYXY`\RTRSSVUVRSTTUXVUYWY[X]abdmoolhfgign{hdc^]\cbampjolcaehachhjlqsjkpgro`ksÙhmrlrurzzz|xskow{ztqgfcZ\ZXZXXYXXXXWUWWZUWVVVVWWWWVVVWWYVYVVVWTTYXWWWVVVXWXYZ[]acb`acca`b`\[WWXXWYWXVYW\nz|vqolpraTSQSUYWTUSUWXU_\XTVUTSTVVXWUTUUUXWUWWWWTUSSSRRPQRRQQQQQRSW\lÖîÿÿÿÿÿÿæ÷Î¤ka_[Y\YY_\YZ\]\\_\[YY[\[\[ZY[XUUUTVUTTUTTRTUTSX[gwwnxwhYUUSTUUWUTWZYSVSRPRPOXWVTRRQQTTRTXYYVQRQQRSSOSWTQQPPORPQNRRPPPORQQPRPPSPPPPRRRQRRRRSSTUUSTTTTXZaime]XUTVUZgnhci{x¢ha`_^YWXWWXVVXVYZXUW[XYZZWWWZZY[VTUUVTTVUTUTUSUXY[\]`d^`_ac`_\[[Y\^`_UTSSTUWVRTTTUVXWZYYX\ccjprqrnlkorqsymj_Y[X][_eneg^cbaa^bdbiokedknpppkqjk}agdsrlrxz{x~shmrrkbffh[]Y\[VXZWXXXVVVXZVWWWWVXVWXVVVWWYVXVUVVTUYXWWWVVVWWXYYZ]`ba_`aca``]ZYYVXYVYXVVXY]ozxrllmrtcUTQRVXUQUUVUXV]^[TUQUSVWYZXVTTVVVXXXWXVTRQQRPQOROQPQSQTU\fl¼çïÿÿÿÿÿÿýúÖ®Ã¯g]ZZYX\a_\[[\Y[^\^Z[ZY\ZY\[\WUTSTUVUTTUURTVVUWW]hxl~rbXVTWVSUWVTVUSSRRQQPRPRPYTRTSRRTUWWVWZWRQQQRQPPSUWRTPPOQPPOQRPPPQQQRRQPORRRRPURSPSSRSTTTUTSSSRQUVZ`d_ZUTSSTYguoox|{ª½­b]bb[YVVVWWVWWVXXWZYXY[Y[][Z\Y\WUVUUUTUVVWVUVVW[]cgb_\[Z]]a_\[\\_bd^UUURUWTSRUVVWWYX_]ad^`eepppihmqtvyrvoc\VWVXY^bidb_cdb`_bimikd]`fhffhjma^\X_dvzqztpnu|zvrjfhmjgfiii]\\ZYW[XY[YZWWWWXWWUWVUXWWXXXVWWYVWVUVUTUYXVVVVVVVXXXYZ]`a`^__a_^^\YYZXYZVYWWZWZbpuuqlnosueVSRTVVUTVVWUVX]b^WTTUTSYWVVUQSVWWWXXWVURSRPQQQOSNNNPOPRV`mÊøÿÿÿÿÿÿÿþî×«ªÏçÒn^ZZYX\`^ZYXXYY\[\[\[[Z[X]Z[ZXTUUUUVTTVRSQSVTSU[^myn`^XWRVWUXWVTUVTSSSSRRRRQRVUTURWSVUYXSRWYRPPPQPQQQQVVQPPOPPPPTRPPQQPPRRRQRWUTRPSQQQSSRSTTTTRRTRQORSTW[YVSRQRSXg{v{}~ ¿¨tme^ZXUVWVWVYXWVW[XYZ\X]^]Z[`[UTWVVVYUSTUUTUWWZ`ji_[]]Z\\]\\`^\_bicWVUTUTSTSSUXUYYWbfegkflbjkhfjknuuqknseZVVVUW`kkaa_ca___accbi_[\a`ZY]]^ZZW\Zfwxntsklotwotqgfoqjhfec^\Y\YX[XZ\XXWXWWWVXVVVTVXVWXWWXXXUWXUWUUVYWVVVWVVWXWXYY]``_^^^`^]\\YYYXXYVYYYYX[irxysxztqugYTSUWTSTUVUVVZ``[XWRUWRWWWUQQRSVVWVUWUSPQRPPQPQPONNOPOTR]hÀóÿÿÿÿÿÿÿýììÜËßëþä¦peb\YZ\\[ZYYXY[XX[[[\\\[X_ZZYYWRTSUVUVTURRUUSTUTXerjX\[ZVVVUVUWUVVVUU[XQPQRQPOSVSSQVYSSUUPTUUSPONPONPPPRUTOQOOPOOPQOQRRPRQUTTTWVQQQPPQOSQRRSQSSQTTQRQRRRSRSSRQPQRWg~Â£²xp]YWUUVWXX[YUUUYZZZYZ]__\[a`[TWWVVUTSTSSVXUVY^ffc^ZZ[ZZ^aZ_^\\`g_WTTUUTSTTSUVTWZV_fgenmtdfkcdijjqlbbhldXUUWV[dlfadcaa`__]]\Z]XXYZYWZYXXWVY[[cppmilosmq}zedkmccid_\[[YYXZZ[X[YVXVXVZXVWVWYWXXWXVVYVWXXVXUWVXVVVVXWVWXWWYY]__^]^]^][[[YYXXXXVYYYYZ_msw{w|zyptcVSUXWSRRUTRSU[c`YXVUWYWWWYXVWVUWVVUSRRQQQQPPPOOPOPPPOTTXg|³òÿÿÿÿÿÿÿÿÿÿÿÿþÿÿÿÿ³ldd\]^]^\\X[ZWXYXZ[^\[\ZX_]WWXYTTTVTVUTUTRTTTRRPTZc`YZYVWVVSTUUUTXTUZYZUQQQRQSSTQSSSVlSRPRQRYUSSPOPOQPPQUTQQNNORORQQPPSRQTUTUXWXTQPOOORQPRRPRTPSSTTSUQSRSRRRPONPQVg£{zÄ¼Ì½£{\YWUUVWWWYXUUUY]]\[]_^^\[Z]]TZXUTXRSUXVWVXSY[ahc]\\\[Y\]]\\Z]a[\YVXUTTTVUTWWWXYX\cjjhhjfec_jfefif_`ij^WWWXYXajcbfd`bd^^]`[WVVWXVVZ\[YYXXZ[`ijlxmmntnlsvxwcajmigif`][Z[ZXYY[Z\[YXXXWWXVWWVVWXXXXWVXXUVXUWTVSXUVVVWXWXYWWYY^^^]\]\][ZY[YYXWWXVYYZZ]cquywuyxwpg_TWRWXVVSTTSUVZc^WXWWYXYZYZZYZYXYWWTQOQPQPPPPOOPPOOPPTU^^¾ßÿÿÿÿÿÿÿÿÿÿÿÿÿÿÿÿÿÿÞde_a\``[\Y^Y[ZYYZ]_`__ZY^_XWVXWWUUUWUTVRTSURQPQUW\a^YUVWVUTWUUXVVV`n`WVTRRQQRQRQRQQW]VUQPQRVSRSORQNQOPOWUPRQPQRQPQPRPTTSSPRSTRSPPOPPORSPRRPQSUTQV]TYYSSTQRPOPPOOXk{}qvqÇÖåÛºs[XWUUVWVWXXVVUY[[[Z\]]]]\YZ]ZYVTTSTTW]_YVWWX\\\dccfb^\[\^]ZZb\Y[XXXVXY[^]X[[\b`acefhomgfgcf]a`ab`chjib`^^a_]adbb^afb`_`fcY[XVXWXWXZZYXXZZX_in|zklsrqmrflahkmhfgdb]YZZZYYZ][]\YZVYWZWWXWWWXWYWXYVXXUWYVTXWVVTVUVVVVXXYXYZ\]^]\\[\ZXWZYXWWWWVYY[[`huw{ttwvvqh^UWSX[\ZXUUUUX[aZTVWXXXXY[Y\ZYZXXXVRSOQPNPPOOQOOPQQQSY`i{Àÿÿÿÿÿÿÿÿÿÿÿÿÿÿÿÿÿÿÿÿéfccefbb`\]YY[]ZYZ[^]`]XZ_cXXVUYZUVUUWVXURUSRQSSTVW]_XUVUUVTUTWWW[htme^XPQTPPRRTRRRQUWVWSONOTPOOOQPPPNPQYVQQRPPPPQOPQPROSRNPQSQQNRQPOPQQOQSRQTZ[RWZ_]ZTVQSPRPQQOOXdeed^cjl¹èÿÿúÒlZXWUUVVUVWWVVVZYZ[Z[\\]\[XY\YVTTUUSTYa^ZWSYVZ\[`hhfd_\\]`]Y]c_ZY[YX\^_fab`beddachefikniciig_\\[]^a_`gdbfhea_]Z^baaeba_anjXYWUWYWYYZXZXVVX]swwÀ¦ztxwnpwilmwuyuiggf]\\XYYZZ[\\ZYZXWWZXXXXWXWXXWXXVWWVWXWUWVWWVUUYTVWWWWZ[Z\[]\[[[[WWVZYXWVVVVYY\^blyyyqruttqh]WWTY_ca]VUUUZ\_YWXWWXXYZYZYXYZWVUUPRPQPPPPOOOOOMORTUa¥ÒÿÿÿÿÿÿÿÿÿÿÿÿÿÿÿÿÿÿÿÿÿÿÐ}mlqlb`^]ZZYZYZ[Y\Z[XZ[]hXXXWWVUUTTVVTVTSQQSRSXSUW_[TVUUVVXVVZdourlkhYQPPPPSUSQRPOQRUWUQOOROONPOPPOOQPXXSQPOQOOPPOPPPQPPOPQQQQQPRPTMPQQQRTRRWZWUZjcVVTRSPPQQQPPPSTVX[`h°ÛýÿÿòÊn\XWUUVUTUVWWWVXXYZZ[[[]\ZXY[XUTUVUSW[_ZZVUXTXZY]fgce_]]`a]_db]Z[][[\[[_^_deb`b^`ecbchlkhhf^YXXZYZ^_^f_^fgac^[\a`bhhda\XZYZ[ZXUXWVYVVZVWZ\d­upusnrtqouyztwqqmg_\[X[YZW\[ZZZYXXWXWZWWVWVXYXXYVVVWWVWVVWWWVWVXUYWWWWZYZ[[\Z[[[YXXYZYXYXVVVYZ]aep}{tnprrsrh\XXV[cjgcXVVU\^_YWXVWXZWV[YUUYZWWXTOQSPONPKQOMONQPRYWf¡äÿÿÿÿÿÿÿÿÿÿÿÿÿÿÿÿÿÿÿÿÿÿÿÿí¹}pa^^[\YXYZZYZY_YW_]a_YXYUVXXVTUTTWURSQQSURSTTT[_XUVUVYUVZjurmlkmiaUSRSQSVUSRNLSQSTSRRNNPOOOMNRQPOQQYTRQORNONOOOONMPQPQURPPSPTQWSQPRQTTSSTWYUZd^WSTTRQQQPRNNNPSTTW[jÈéÿÿÿñÄrYZVXSTTTUUWXXWVWXZZZZ[][YXXZWUTVWVTXY[ZZVUXWW\\`ajec\[afb`bfa[\]]^abc[Z[]^]Z[Z^[]YZ^^gkga\ZZYYYWZ_`cf]_]fdd\^bba`da]ZZ[[__dcZYXUYWUUYXZ^[\m~zzvkprltzqppleoolgc\]\[Y\ZY[YZZ[ZXYYYXYXWWXWXZWWXUXVWUXXVVWXVVVbhTXVWWX[U[Y\ZYZYYWXWWZXXYVWXVX[^ghu}pkmppqrf[YXW\gpmfYWWV^``YXXVWXYXW[YVVXZWUTRPQRPNOOMPNMNMNNQYV{ÚÿÿÿÿÿÿÿÿÿÿÿÿÿÿÿÿÿÿÿÿÿÿÿÿÿÿåÑÃucba^]\]ZYYZY[aZ\`ZYX]VYUTWWTTSSSSSRRSSSSUTSTQXZ^WVTVTZ[\qsoklkjkj]VWSQSWTSSPNOPRNQQNQMMOPMLPSPNONSVUPQPOPOPPRNQONOQRTVRPPQQSQSNQQRPSTTUU[ab_edZVXVRONQOROOPPPTQTZkËòÿþüðÍ§{YXWWUVTSTTRVXXVUWZZZY[]ZXXXYWTUWXWUYXWZZWVXWX\\_aic]^Z^ffabd_[__\aecc`\Z]\YYYX[ZZ[U[cfa\Z[[[[XY[^afjf^\\`b[[b_a`^Z[ZWZ][X`hc\][Z\\[[][_\`Ybcql|loo{ytlgfhnmfca]^[ZY[YYXZZZ[ZZXYYXXXWXXWVXWVWUVUYWWXWWTXVUV\[VWWWVXYYZY\Z\ZUYWWXXWYWXVVWWV[gop|sjhinnpseZYXX]kwrh[XXV`c`ZYYVWXYYY\ZXWYZWVTRQQRRPNMONOMMPNNNSRñÿÿÿÿÿÿÿÿÿÿÿÿÿÿÿÿÿÿÿÿÿÿÿÿÿÿÿÿøÉgcdcbabb][Z\^[X[]YYZ^UWSRRSUTRSRUQSSRRRTUSTTSUX]]VTWZgihnxonnpjmsdWUQRTVUTVQMOOPNMQOMPNOPLOMNONNNPTSOQPQPUTTQOPPPSSSUSQRSQPPRSPTRTORUTRV[mokjg]VWVSPPRPPPOMPRVRU]vËûÿõèØ·¡aWUUTTUTTUWVUWUUXX][Y\\YWXXYWTVXYXVXVWZZWVXWZ\\_ahb`_[]dda_`_[a^_edb`b^XZ[[XUVYWYXXY\\ZXXX]\[]^`ddeig^YY[`edd^[\[WXXZ]Z[_ce`[\ZZ[Z][__c_]\cbpr{~puq¡{murjiihgda`]Z[[YZZX]WYY[YZXXZWXXXXYWWXWVVXWYXYVYVXTXUWUWTWVVWUWZ[[Y\[YZZWWWVXYXYVVVXXX]lvv|wjfdeinkwjY[YZ_o~wi\YYVbeaZZYVWYZZ[][ZYZZXWUSRRRSPONONNOOKNPNSTÿÿÿÿÿÿÿÿÿÿÿÿÿÿÿÿÿÿÿÿþîëÿÿÿÿÿÿÿïg`b`a_ef^[ZZZXW[\YYYaWSTVRTSSTQPSSSRRQRRUVTUUTY]_[X`myrmwsormsiu{eURORUVVTSPOPOONLPNQNPNQLQMLQNLORUPOPOOQRTPRPNPRRTSRPQTTROORRPTSROPWWTUVgfgcbcX[XSRRQOOOOOQRUUW^eÌñþ÷çØ¥gYVUVVVUUVVUVVUWVX[WY]WVVTVXXWWY[YWWUWZZXWXXZ]\^agac`]]bc`^`_[`]_][ZXXYWUWXY[XWUVUWXY\YWXW_]]g_Z`]`cgaYX]dfgd\W[V\[XZ`Y[^c`\YZ\Z[[\ZZ]]_^^``uuguuz¥~pxumhcbcdd`^]ZZ[ZYXW[YXZXXVYXXXXYWYYWWXXXXXVWWXWVVVXVVWVWVVVWWXYYYY\[ZYXWWUXWXUWUUWVW\aklipsfaacjjmvnZZZXZkyri^ZZWehaZ[YVWZ[[]^\\Z[[YXVTSSSTQPOONNOOLOPRTVèÿþÿÿÿÿÿÿÿÿÿÿÿÿÿÿåØÖÓÜõÿÿÿÿÿÿÿÿÂo__^^]`]YXYZZ[[\\Z[XbZSSRVUSTTRTURRRTSTSUUSTTRXYY^dpvnop}{pnur~ewbUROQTUUSQPPNMOONRPNQNQPNPNMPONPPUQNORTQRSQRQPTTWVTRQQSUQOQSSTSRRPPRTSUU^a\[ec]lf]``YQOQPORRTXWY_}³ÝèçéÒ_WVVUUUUVVUVWWZWVWZUWZTTSVSZXZ[YWUVVUWZZYXXY[]\^afdda^]`a_^`_\_]_]\ZXXYXURVW]`[XVTUVWXXY]Y[adke[_]cai_Z\_dfdaYXXYY[`]^YWZ^\XYY[\YZ\][]_]]^[^nkbknszkfdgfgkga][[ZZXZXZYX[YWXXZWXVYWYZXVWWXXVVXUWXVVWUWVXXTXWWWXYX[YY[[YZZVWVWWXVTWUWWX[]dckpmf``eimsxp\YZ_[Yc_aZZVYe_Z[\ZVX\\\__]^[\[ZYWTTTTURQPONNOPMPQSTVzÐããçóÿÿÿÿÿÿÿúÿÿÿâ½§«Ìòÿÿÿÿÿÿÿÿå`b``XZZXXYZ`_^[ZYXXd_VURTVRTRSSSRSSURUPVTUTSUSUX]irmlmrxvsmqzubiaUQSPYWWSROPPNPQQRSRPOROQNQNONOPOVQQNUYSRTRPPQUUQTRRSTORRSRTRQRPPPRRUXXXZZY[^]`vzrqq^VRSRSTRSWV]n®ÏÐÄ×Ë¥z[VWSVVSSUUX^[W[WUUVUSUVTUSVZYYXTSVTVVWWXWVXZ[^]^bfheb`]^`^^`_]^]_]][YXZYVTWX]`]ZXUUXYX[^_\^ic`bc^__cga_^_dlja^ZXZ\^bc]ZZ[]XZYYY\]ZZ\[[]\\\[`zwooih~x{|ymhijlosob\[[ZYYYY[YZZZWYXVXYUXYZXVVYYYWVWXVXXWVVVWWUXUTVVWXWYYWZYYYYXWWWVXVTWVUWXY^`bdgkigddjmmqvjYYZ`ZVVXYVX[]eYY[Z[XZ^^]a`^`]\[[ZXUUUUVSRQONOPQORRTUVt¸ÈÈÏÛíîïîêéÝÑâìÑ²­ ÃùÿÿÿÿÿÿÿÿÍce`[[YYXXZZ\`]ZYYYX_\YSTUTSSSSRTRTURQQRQSURUVX[[Zannkminrtojc`i^_VRRR[YURPQONOPQRRNNOQROPQMONOOOOSSOPUZUWSQPRUTSQPQRSTQSUTQSSSQPOPTVUUVXVSWXZ^bxzvueYVTUVWUTUW`x©¯zdWVWXUTWUTVVXYWVWWVUUTUWVWSZYTXWWUVTUUY[\`][\\_acedbcdb]\_]^`_^]]_^^[YYZZWVXY]`_]YUVYZX\ab^\d_YZc`bbgag`_[^ehcb[Y\Z[ad[VXXXX[ZYZ\[[[]\\[][[\\ux}zdewykpolmpqvuurf`^[[ZYYXYXXZYYY[WUYWYXXXXWYXUXXWWVWVUVVWUUWXTXVWVVVYYV[WZWZWWXVVVVVWUXWWW_cgjjoghifkqopsfZZY]ZVXXYVYZccVYY[`[Y^_`__]]^\\\[YVWVVWTSRONOPRPSSTUVm ­®·ÃÜÞßÝÖÔÇ¾ÍÕ¿¥¢ÂîÿÿýÿÿÿÿÈh`a][\[[\Z[\\[WYYZWZ[XYVWVTSSSRRRQQSPRTSSQQQYWX[Z[\gqllknpszsbaupbQTTPUWPQRONLNQQQOPPRVTPOQRONOPQSYVMRTVPOQQQSSRSPPRPQSQRRPNSSPQPSQRRPRSTSSVYY[d{|tsoh\XVVUZYVV[_p{~vecggb`ZUUTWUVUVTWT[XWVWYWUTUWWYXVWVTWWVVVRUUY[[`_][\]_fkleac_adb__``_]]`__\ZY[[YXZ[^`b_ZVW[[Y]_b`]b^Y\_bbdh`he_]Z^bca[XZXY_fdZXXXYZZVYZXYZ\X\Y\Z\]\^rvzzkeozspursoss{utuqe^]Z\YXYYZXZ\YYWXYWYWZXXWZWVYZWXWVWVWYWWWWXWVUWUXVWWYYXYXWZVVVYUVXXWVVWVVZ^imllrskigfpoovi`[XYZYXXXWYZhfW\W]a^^^]_a]\]]\]][[XVUWYUTTOOOPSQTTTUVg®ÊÍÏÌÂ¾²«¸¾­±×èëõÿÿÿÿÃu\]\Z\]^[^[\Y[]UXYXYYWWZZ[XTSSRRQRQQQQRUQSRTRYX]ZY]Y]jnlpwptw{{uvudQTQRQUQSQOMLQQRPQOOPUSRQQOOPPRQORSOPSPMQQPSQRRTQQSOQSRRQPQRQPRQRQQPPRTQQRUW\\hy{sjhfa[YZW[XXX[_^]_[YZZXYYWUTVUWVSUUXWXU[YWWWVVY\[XVTVWVUTUUXSSUWZZ\[]\\]]fomkgd]Y]^^a`fccfgea][Z\\[Z[\^`d`\WY\\Y^^bc_`]Z]^abdf`di_a][^_]ZXc^hjpqh^YZ[YWWWXYX[\WXZ[[[\\\ovrsokrsmryzzporvtuwwoc^][YXYVYYX[ZYXXXWXWZZWYZXXYWVWWWWWUWVVVVXYVVWWXVWXWXVWXXWWWVXVYUUWVUVWZ]cmnmrtuphgenmnzjf[[YVWXXXXW^hb[[Z]c]\^^`]]\\\][]\XXZZVSVTTRSTQTSVUUUV`pvx¹½¿»®©£¨}}¡ÁÒØâëêèå±p[ZZ\[aea_[]YYYYZXWXZVV[]_ZTSRRRQRRQQQRURSSSSZ[Z[XZZY`ltznnpuldmxtbQQPPSTSSRPNNQQQOPNONOQPQSPQQRQPOQTPNOPNPOPPORRQTSQOSTTRPQSRPRUSRRPQQQQPPQTT[[nnpnlhhc][XUWVWWWXXXVWZ[YWUVZb]UWZc`[VXWYW^\YYW\\_^ZVVWWVWTSSSTQSUUW]_Y]\]]^dglwnff_[\__\ZY\^bhfgdegea]]^_agb]XZ^]Z\\bfa^\[]]`bddaef^`]\^]\X^khlorpqm\XZYWVUWXZZ[]XVZ]]Y\]hxyrvzuexzytmourpwyytd[\YXZXYYVXZYWWYZXWYZWXXZXXVXYXXWXWVUWWWWVWUVXVWTSVWWVWWVWUVWVWUVVWUVVYZ^ejnnmpwuggklnoxli^[YYXYYZ\[__ZYZ\^\[\^_aY[ZWZ\]]\XVZZUTUTUUTVTUVUWVYVZY[^p§¬¯ªwxv«¼ÅÎ×ÕÒËl[ZY[[`c_][\[[\[ZWYZXTU\ac\TRQRRQRRRRRRUSTTTTYZYZXYXWZdojmkmmhelxp\PQQQTSSRQNLQQQQORMQPNPQPMOQQPNPONSROPNNPQSPQRPURPQOTTTQRPRQPSUSSRPRRPQLRQRUWZhdhkjml`d`WUXUWUUTVVUVWZUVZXbsaSV\ge]W[XVW\^Y]`hd][XWWUUTUVUSSUTSUVY^c^Y[]][X_ktjadd\[^a`_[Z\]c^^_]___dddc_^`_Y\`^[[[bic\[\]\_becbdd^`^]^][X]jimoqotse\ZWYVVVVWX[\ZYY\]^`]gqwvyzp`r¤}sdfqyxrwwib[\YXYXXXYXYWXYWWVWYYXYYXXYXWYZXWZVXWWWWXUUWWVWVVVVUXXWWWUWUVVWXZUUVWVVWafilnmntulklmrqtojaVXVZ[WY^\fd`cejng^]```[WWW[\[][]][ZXVVVWVUVUUTZWWXZZ[Z\a~~xsyzwuvrsn¥±»ÃÀ»±h[ZY[[_b^\Z[ZZ[YXWX[_QUW\cdYSQRSQRSRRRRUTUUUVYYXYYXWWYajgjmqlhnjpaTPPQSSSRROMOOPRROOOOQPNQOPPRPSPPNPURPPOOPRUTPOPRRRPOSUUTTPTSTSSQPQQQRRPOPQRU\b`fkpptpdd`XV[WXVTUXYTUUVUTUX\fYV\`a^ZZ^\[[[cdjma^Z]YWVTTUTVWTSTUTUU\bbd][Y[VUZ`]`e^`b^\\^^^^[[_Y][]YUX\YYWVVYVUZ[[^ZZble[[\][^beabab^__^^][X]jjnpqptsg_][YVVXWWYXWVV[Y[baZ\_humec^pÁ¢||mgrzsmzla\[YXWWYXYYXWWWXXXWYVXWYYWXWWWYXWXVXVWWUZTXWVVUWWWVWXXWVVVVWVWVYUWUVUXWZbiikqurtvqnljoqtqf`YZYYY[Y^[fgkstonmfee_b^YYY][Y\^_aZ\YZYWXZYUUVVVUVXZZ[[[^cbghnljdaedeilmngp~§¯«¥|d[ZYZ[^`][Z[ZZZXWWXZ^PSTY`d^TPRQQRRSSSSVVVVWWXXWXXWXXY^edgjnjgmkh\QNROQQRQRPMOQQQPQQLOPPPPQORQQSTRSXYSPOPRQQRRONPQPPQOQTRUQRTSRPSOOQQQRQPPPQQS\gdchlmpih]YXY^YZTTVVUSSSSSSTUYYZX^_XVXY[]^acgmnojY[Z\YUVVUSSUSSTSUV[flfde`^WZWWY\bb`defc^\]]][Z[Y[[[XVVZXWTQVVU\XVZ\[[`cgg^_][^cf`__`^_`_^\[Y\ilooqqttica_\XWXWWVUSWXZZZ[[\\]n||d[_x°¾nestnoz}o`\ZYYXWXWYYWZXVYWXWZVWXXXXXWWXXYXWWXVVWVZVWWTUUWXWWVXUUUVUVWUXWVUWWWUYXX`chmsvry}vmptnowta\YZXWW\[[\bfu{|ooqtqd^]]`_YZ[Z[\][Y\WZZVZ[[YWVXXXYZ\ZZ]cifda_dbc]Z^_pzvoi``hy}j`[YYZ[]_\ZZZYYYWVWYZ]POQVWbdVRRRQPQTTUVVWWXYYXWWXXXYYX[`adgliglmaWUQSOQQQRQNNMOSQPQOLMNOPNNPPRQPTSZTWVOSUPPQOPOMNPQPQOSQTRRQQQRPOPORPOSQSPPSPT^bebb`drvpc``]a\[VXVTRRTTSTSSTX\\Z\_VVXY[cb_]_gich`YX]YUWVXTTSUSTSUV^adgdec_\WYW[[Z^]aagihc_[]\Z]]XXZXXVXXSVRUVVWXYUWZ^abgka]\^eb^]`]^^_a`^\[Y\imonrrttlgea_[XXWWVVUYZ\[YXZ\agiwt_\b¤vhsruxyvtk_[ZYYXXXYXVXWYVWXWYUYVYYWYXWXYWWXVVXWVUXUWVVWVYUWWVXWWUVWVXXVVXVTVVVYYY^ahjpsss|{ontsrwwg[WXWVZY\[_kuwvyopqlqc`\[d^VW[]\\XYX[VWWVXXXZZWWX\\]]ahmjfb_`_b^`[\[]dkld^]Z]byxcY\ZYYY[\][ZZZYYXVVWZZ\PMSOU]c]RSRRRRUWYWWWXXZ[\[YYYYZZXX[]`eiggke^YZTTPQQRQPNNMPRRRPNMNOOPPPOONNQSSNQTWRZWSMQRPONQROQRPQSRQPQRPQQPRPRQOQXSQSSRT[ggcb`htrmvmjhgfe`\XZTUVSUUUUUVVXXSSTUX^^_VYXXagefcZWWUUUWUUSVRWRTUV]]\bc_`ab_X[_][]^\^^cegbaa__`]YZWWXWVRSSSUTSUVWVXUX^`afb]aca_^ZZXXZ_eb]\[Z\ionmrstunkgeb^ZXXWWWX\]^][ZY[_dir|xj`^nlosztuvtla[ZZYYXYYXWXXXYVWWYUYVWVWXXWWXVXWWYXVXWVVVVUVWWVWTXUUXWUUXVVVXWVVWWWWYZ_fnipwyxzyqpxzty}k\[ZYYX[\Z\pqknkglgjqib]ZZXXWY]^\Z[Z\\VWUYYWYYTX\bcecfiid__^``^^\^Z^^a_`[\Z\\_pud[ZZYYYY\[\[ZZYXXWVVWZZ[OONRSXabVPUSSTX[XXVY[YY]ZYYXYZ[\YXYZ]dgfgje`^^WUQQRRPPOONQQQQONMNOPQOOONONQQQQQVYY]VRQSSRQNNQQQRQQPRQOQSPQRSQQQQOUSWTTUW\]ca__amwpryplmlig`acdWSUTVTWUTTTVWSZ_[V]\ZYXXW`fikdYUUVTUXWUTTUURUTX[[dg```adcbdgfa____\^^agddcd]]YYZXWTRSSTUTTUUVVVYVXZZ]\bac_ZZZVVVX_ea_][[Z`mmimsuuvqmjiea[XXXWXZ_``_]\YZ^bjsurg_ak{pksixxnoorna[ZZXYXXXXYXXXWWXWYWXWYWYUXXWXVYVXXYXVVWVUXVTUVWUXUVVVUVUXVVWWWWWVVWXXZ_gonrwzy{zsozvtvzg]\_[YWZZYbjdadbahpsrkfc]^[]ZY[_\ZY[[YWWVZ[YZZb`ceed]cbegb_]_``_\]^]^_^[Y[\Z\\fouj]YYYWXYY[\[[ZZYXXVVVW[ZZMNPQPT\aZTRTXXZZ[VYZ[[XY[YXYYY[ZX[YYZ^hgeiibdcZWRRRQOPOONPPQQONMNOPPOOONOOPRPOORZ^XQRQSTTQOPQQOPOOORRPPQPOPPQPQPQRS_YVVZZXd```emrlrsnljigifhhbWWVVTVUXUUVTTO]d]XWYZZVWWaqqdUVTWYUUWWTUSUYVUUXXW_d^c`_afighgda_`aaa`]^cba_[Z[\YVUUTTSRSSTWVTUUWXXXXZX_`\a__]VUUVZZYZ\[YZ\hllrusmkommmid]YYYXY]bcbaa^XY\aklnme_ditlktoxwpjityi]YZYWYYWYYXXXWXXWXXWXVVXUWY[YVWWWWWVUUWWVVUVVUUVUUVSVUVUWUYWVVWVWWVWXZ]emnouzzzutxwustgY\\[[WWYZbjb\\]ajkijljc^\a^Z]\^[[Y[ZXWWWVZ^_elc]_\^]`_ckb_]^`_^]\\][Z][\Z]^Y\bgb^Z\YYXXYZ]^[Z[[XXVXZWX\ZYOOPPQSW`_UWYZZZY\XXYZ[ZZYXX[Z[]^\[ZY[]bhdghZcpaXWTRPOPPPOOPQQNNMNOPPOOOOOOPRPOPTY^UQPOSTQPOPOQNPQPQUTPPPPOOQRQRQRSV[XVUXWZaccejmrgrunppjjjihb_YWVXUXUUUUVRRTQRSTWXWXXXW`{|[UVXVTTXWSXSW\YYXXVVV[bca_a_hecccdca``beg^[]\Z[[[VWVTSTTURTRTUUUTTUTY\^ZZ\]a_`[[YVUTVVWZYZ[[\drvpoqrsonlnjlkcZXZYZ`efdce`XX[bdfhgb^dfymiluuywpjkstk^]\WXYXYYYVWYWXWWWY[WYXWWWXWYXXWWXVXVWUWUVWWUTUWUTTVWUVVWTWWWWXUWVXXY[aeiilv|{rux}zxsb^Z]\\XXZ[_id[]^afjhikmld^]^\]``^Y[[XZZY\_begb\ZY]\^[a``f`]a_a_^\Y[^[[\]]\[ZZ[aaY[\YYXWYZZ\^Z[]ZYZWZ\YXZXVPPQSQPU^`ZWYY[YWY[ZZZYYYXY[\ZXVUX]]Y[]]chkdSZkaYWVROPRQPOPPQQNNNNOOOOOOOOPQSQPRVZ]UQPPRSQONSOOROQQQTQPQQRONRTRSRQT[_URVX[Zd^ehpmlirsorwv|jd\YVVVWVWUTTUVSSUPRTTVWWWWVV_vx`UVXTTVWWSVVUZWVXVWWWWX]^Zbeb^Z[`ed`_^`hkg`\[XZXXRWTTSSTUWSTSUTUSTVUW][Z``_a[YXUXWVV[[WYYZ\gimvuqpnnqpoortolkaY[YXXcrpficXXZ[]`ab`^bdriflvxyvokmspm`^[WXXXXXYUUXVWVWWWYXWVVXWXWWWXVWWXVUWUVVVWUUVUUTTVVVUVWVTXWVXTUXWWZZ^`bgilrz}zuruy~{{}hZ[__`W[YZ\ic\]^^ckiihkni__^^[\]\WZYZ\^ec^^^ZXXXX[Z\Z_^_a_\^]__^^XZ_\ZZ]_^\YYZYY[Z[XXYY[YYY\ZZ[[[YXZ][YXVWQOPQSSS\a\WXWWYYXXVZ[XY[][\YSUUUUYZWXZZ^ed\RRU[]]YRQQVNQNPMQPOOMOONOOPOOOPQSRQTWX]VQPRRSPOOSPOQPOSSUUSSQTRRPSVSTVY]\VSSSX]]Xc`iglrrokjijumd`[VTUWYVTUVX\YTSTQUSUUWXWXYV]mo_UUUUWVWYTWVWSUVUVVVWWVXXY[ZWUWWV]_`d^\``__ZWVVWXSUSVUTTTVWVTSRWVTUUVYWUX]b_XZVWXYX[bh^]YZ]beqvqsskkrzuntuslor\ZYY[]lihgZUXYWVZ[]^^_akgcmwyzvokosooa`[XXXXXXXUUWUVVWXWVWXWWWXVVXXWWVWXVVXXVXVUTXVTVVVWUVVUVVWWVWUWUXVYYZ_`dkqmjrz{vsvxvu{s`_``d`YYX_\ke\`_]`giggffe^[[\\[Z]W]`_ebYWWVVYXYYXXXY\`]b^_\\\^]\_ZY]ZZ[]\[][ZWVX[XWXY[WWXYWZZYZ[\ZX[]ZXXXYRQQQSUSW`aVUUUWYWWVTVWYYWYVSPTRRSUURUWYW\_ZVQPT[c_UTROPNPPNRRNMOOOPSQNOPPPRTSRSUY]VQPQQRPPPSQOQPORRTTRQPUSRORWUXWUX[YTQQSWa`^UTTU]^`dfdahcf^XSTVUUUUUYZVUUVUTSWVVW[VYYXWmk[TTWXWWXWWWXYUWUVXX[YYVUVXVUSUTVWU\][]WXUVXWVUUVVUURVWVRXZUVWSTVTUTTTTUUUX`^XWVVWZWZ\eei`]]\bqqrrrqoqttnqpqoruf^VZa^cjc[YVWVVWZ[\[[]_ee`nyyzuplqsqqc`[XXXYXXXUUVUVVWXWVWXWWWYXVUWXVVXVXVWWWVVVWVWTVTUTVTVUWWXXWWUWWYXYZYbcep~zoptvtrqplrui_]]_cgYWY^\hc_^`_]__fcfea\[ZXZ[^da`_]]XWUUUTWUUXVVWWZ]]][^^[\][[\[[[XY\]\Z_[ZXVXZXXWXYV[WZZXXXX[][[\][ZXWYSOQQPSRS\c\RRRTUVVRQSSUVTUSRUTTTPSTSUTVXZ_`XQPRSX[VSPRPMPPOUTOOPNOTWOPNPPQRSQOQS[]WRQQQRQQQSQOQPPQRSSRPPTRQOSUWYTVUTSRQRRY^\YTTSTRVUYY][a`b_XQSUTTUVVVVTTUUVUVWWVTZY^XYXecYTWVWWVVWUXZXXXVWUY[ZYVXXTUVSVUSUTV[ZXVVTVUVXUWUUUSTUVVWYXTUTTTTUY\[VVVSTV_^]\WUUYX[acjhcf`_`urrxssonqttsplpsomf\Z\cg`XYWUUUWVXYX\[[`ip|{uqmssssd_[YXXYXXWVUUUVVWXWWXXWWWXWVUWVUUWVUVVVWWWVUWUVVVXWXTXUWWXXWVUUWWVYXZbjiq}sprrrpqqnt{pa[Y\aa[YZY\lh]^^_^_b^`]aa\[^[W^dfaYV\XXXVRUTTXTTYYXW\\\][[[^]\[ZY[Z\ZY\\Y\a`^YWXYZWWXXXXZZWVVYXWZ[\][YZXXZTSRQRRRRV`bXOOOPQRQQQRRRSTSRSSTSUSTUUSX\\[_WUQQRPSTRPPPNOPOQOPOOQQUROQMNQPRQRPPRVXYUPQQRSRSSQOQPPPQRRQPPTRPPTVYZTUTTSRQTSW\ZVSSTTSSSTTTRVUYYVPRSTRUSUSSUTTTVVUVWVUZ]b`YU[YWTVYXWTTVWWVWXZYVWY[[WVYUVVVUXXUURTXWVUWUTUTWVUWYXTVTVZ\[VTVWWUSY[\`VVTVXW^^[]ZWVXY_illebokdhxsrtrmroqszxpnwxrpqf\agbVXYUVUYUUVW\Y[]ipt¾½{vtuxt}vf^[ZXXYXXWVUUUVVWXXXXXWWWWVVUWVUUVVUUUVVXSVUVUWUVXTWTVVWWWXXWWVWXWXX\cgfo|vsrvwrsotqsvumaY_b][]][]gmc`_a]\^^\]db\_a``ecZXWWYXZYUUUVVTV\][YV[]][]\\]][ZZXYZZXZ[[YZ[ZZWWWYXZXZXVX[[YWXYXYVZX]YX[Z[[RQQPQRRPS]c`SOPRPPORPRPOSRSRQRQSURTTUVX[[Z[YORPQRPNRTQOOPPPOOOQPPOQNNSMOQORTUSROQXURRRRSTRQQOPQQQPQQQQOPSQPQUW[\TUSTSRSUUXZXUSSTRRRRTTTTUSVRTTSSUQURUUSUSTVWVVVWVUX_f\[]UVXSVVUWTUUTUVXYZXTUWZ]ZWVVWWUWWWTUTUVWUTVXWUVVWWSWUTVVX[]YYXVWVVXYYUYVYUUY[Y^\\ZVZYY[jrljjlimopqtqpkirqovrrswvojuxkgaZYVXXVWXUVXZZZ]`u{t¯´wpqqoqxob^\YYZZXXWWVUUVVWXXXYXWWWWVVUWVUUVVUUUVVWTVUVVVUWVRWUVUVWXXXUVXXVXYW[ccdnrprwusoprtqssyudZaa]^^^]_hh\^_c\[``c_d`__d^^`_\YXXWWYYVUWXXX[\Z[XV\[[\_]^^[YXYZ\]\\[YZZ[X]VWXXYWWXYWVX[Z[[ZZ]ZYZW]ZY[Z[^QQNOPQPPRQXc^UQUQQPRRQRQTTSTUUSSTTUUXVUXY[]\TSSQROOSRNNOPPOQQOQPMOPPPRNPOSWVSRQQQ\dXRTQRSPQQOOPPPQQQQQOPSQQRVX]]TTSTTSVWXYXVSRRRRQRRRRUXVTTSTSSUTRVUVWWUUSWWWTVWUUW`f^__UUVUSXVXUUUTUWTVWWUVUZ]ZWYZYWVWWWVTUVUXTUYVVUVXWUVWUTUUYXXYWXUUSUSTTTVVTVZZZZ]b[UY[Y]clpprrmljirqrslc`adfjlr{{mi`gyxkfb]XXWWYVWWVYYZ]ajuxx}{yrlihlphd`]\XYZWWWWVVUVWXXYYYXWWWVVVUWVVUVVUUUVVWUVUVVVUVVSVVWVYWVVWUWUWXWXX[ckmnllmqvrorrsnnvvoi`dc][^][dib][_b\[_ba`eb`_Y\Zd_^\]ZXWYXVSTXXY^[UWVUX[[\^Z]][YXY^]Z\\YWXYVYYXXY[UVZXYVXY\ZZZ^\[[[\XYYX[Z\_RSQNQQNORSU_d^SRQNRSSSSVSPRSSVVUSUVUVTVVYZ[X[UROQOPRMONOPPNOONOONNNNRPRUUUVQOPOQPZlYRTTQUVTRPPNOPPRPQQPPPPOSWY__USRTTVXXY[VTRRQQRQRRQRUWUSSTTRTVTUVVUUUWVUWYYVVVUVX\hk`WUUUUYVUVUVTTTVSVUYWWVWWVVXYWVVVVWTWUUVWWUYVVVTXXSUVUTSSSUWXXYVWVTTUTSUTTVYZZ\Z``YV\Ycrqqqtrrlb]bfgki\[^\`afkkslfamwomjc_][[XVW[[X]Z`gvvsosxxssmjjnog`^]YWXWVXVWWUXUWXWYZXWWWVVVUWVVUVVUUUWVWVVVVVVUVVTUVWVXWVVWXVVYWXXYZ`lvrkkpvwrmnqvpmxxigadf]]c^api`[[\_^]^^]Zbe_\\Z\h[]^\\XZYXXXWVUX\ZUUVWZZZ]`]Y^Z[XZ[[\ZYXWWXYXWWYZYWXVXZYW]X\YZ\Z[[[[[ZWY]]\]RPPPOOQROPST^d^TNRPSTTUTQRRQSTTRSTUTVUVYXXWX[PSRQPPRLOQOPOPOOMOPOPPOOOR]^TSNQPOOPR^WXYWZ[YTQQQPQRQQPQQQPPPQUWTX]YRRTUY[Z[\TRRRPQRQRRQRUVTSSTTSTUTTUVVSUTWTWVWUSWTWXZa_WSUWUW[ZUWWWTTUUUUVYVVTVUVVVWYYXVVVWWUUWVUUVUUUUZUUVTTUSSVUVWXYWYWVVURSUSTTXYYYW\`YSZZfqplnplth_^^^ckh_]\\^bekklkimqm ppyujihc`]YY[ZZ\_jrtqszsuvukimstj`][[XYWWWXWXVWXVYWYYWWXVUVWVWVWVVVUUVWVWVVVVVVVVVUUUWVWWVVWWVWYWXXWWahx}uqx|tmkmsyvsyxkb`dg_a`\usd\\]]^_[ZZZZ]`[Y[[`g[]][YXYXYZYYXY[[ZXWX[ZYZ]_[[\ZZYY\W[WZWWXXYXVXYZYXVUVXXUZX][[XYZUYX\^ZYYWY[RPRPPROSRPRQS^f]UPQSTQRRRPRRTSTSSSTSUUVXWWWXYVTSPPSSOROQPOONKPPONPPPONPQRNNQOOPPNS\WccbXVTPQQQPRSSQOPPPQQSTVURTWVSRUUX_`a^RQSRPQRQRQQRTUSRSTTTTTTTUUTRTSVVWVXTTUUWXZ[YWTWVTUVWYXYXUUUVVUVXVVUUXUVWSX[YVVVUWUVYVTYUUWTUXXSUVTVSTWYWVXXWVTVWTUUVSRUUYYY]X^]ZX\ciebfdelc][^\fkfomadikilnkktsh]my`iwndjgehjha\YZ\itqswytxxgjlrvk_^][ZXYWWYWXWVTYYVXXVZVVVWWUVWWWXWVUWXVWVVVVVVVVVVTUWVWWVVWWVXYWXYXW`ftztw{}vnjmu{wrwxldcii`af`yhb^[Z]\\Z[ZYZ[\ZY[`e[\\Y[ZYYYYXXZZ]\[YYZYYZ]]^]Z]YY[YZYXYZYXWVWVVXZ[ZYXXWXXWXY\]ZZYUYWYZ\YY[[XZRTVRQQRSQRQQRTZbaXSQPRRUUQRTSRRSRTTSSUWXXVUYVUUQQQQRLOQPPNPQMOPNOORNNNONOONPONQSQQY[a``WOTNRNQQQRQQPRRPQUWWWSTSSSRRUSV`bb\QRRRQQRQRPQSSTRRSTTTTTTTUTSRTSVVVUWTTUVWVWZ\XWXSVVXZYYZZXVWWVVWXVUWWWSWUVUYXXVYWXXWYWUWWWVTUVUVUUTTTVWXSXYWVUTTTUVTUTTWVU[ZaYY]_^_`fjib]]\]]_[]fnuxjemyxiijkph_[__Z^cichg`cnzonormnqpvypbhpqvp_\Y[YYVUXXVWWYWYXXXXWXUXYVXVVWVXXWWWVWVWXWWVVWWVVWSVWVWWVVWWWXYWXYXW`dpwtwzzumikrzvouxofbgj^`]\{ygeaXWXYWWVXXVXZ[[[ac[\ZYYYZ[Z[WZYY\\][\Z[[ZY[[^\Z[YZ[ZY\YX[VXWYWUWYZZXXWWVWY[Z[ZZ\VZW[ZWW[[YZYZ@@AADGHHGGGGGFGJKJNJIEIEHFACACCCBB@>;>?>@@><>>=>?A?AADEB@DEDBB@B@>;<<<>=>@B?==<<<;;;;<;:BCA>@BB@=?@?=<?>??@>@@@;:<>@D?ABABA@?=>A@@ABACBBDB@BD@@?@BBAAAAA@???@DFC@?ABDDJIE@DDEFIDBEEDEIJJHFHKJMJHKHHGGGIHHIGEEDCC@@=??=>@@?A@>?AA?????@@@@FKHJDBBDEDEDFGFFFDFFFFFHJIFDCDBCDHGMKOJECBACBGIGHHILIEEFFDDDDGHIJMLJGFEDBBEEHJPHBBCCBAA@CCDDD@BBBDL\qwpxve^bdPDFGGGJSj}sV@=@?@<>>?>==><<>@???ADECA@CDCFJNSPQPXclnsuhSIJLHEDEGIKIHKKJMJLKIIHJIHIJGFGHGEEDCBBDB>=>?@>??FECA>@?@?@@@@@?>=<<>?>;<=><??<<>=<==>>=<;=<;::<;:<=?>@?>>?>;:?@@@DDFEGGGGFFFFEGFIOMJJIHIB@A?DCFCABA<<>?A?<;>?@AA@=<AEB@<ABEBC@A@>;==<???BC?<<;<<;;;;;;:AB@>=CGB=>?=<====>@@?D@>9>@@A?>ADCDDA@ABBAA?ACCEJFB@FA?AAAB@@CAA@?>@>>CB@??ADFHIGCFDFEGFCEA@ADFGIJU]WPHLLFEIIHKLLHFHHBADCB=?<=??@@@@?@CC@A@??>?>=@DKRHCBECAKOLLKLPIGGGHJLJFCCBCCCEHHOMOHDBCBBGJKGEGMNIEFDDDFFEFHJKOMKGEDDBBCCFHOGBABABA@@BCCDEBCBBCGWmpmlnqtdk`RQROQajq~~W??@?A><??<===><>=??@BHHCAACDDGLMPNOMMQYbjfZKIMKLGDHMNMJKMKLLKLIIHHIJJJIFDHFGEFCABC???>AA>>EDDCCA>B??>?@>A@>>>=>===<;=<>??<=>==;;?><<<<<988;;;<=?<??>>@>;;@?ACC?DDEFGFFEFGFFGHILKKHECBBDADBCCCDC@===>>;;=?AA@>>>?CC@=>>?A>=>=?<>>=@AAEE?;;;<<;;:;;<;@A?=?BEA<<<<>??==>>?@DB>;=?>DF??@ADEEECCEDBCEEEHRKB?CFAA?=A@A?=@BB@?<>DC@A@@BFFHD>BCGEFCCD@?CA@CFOX`ibQONFFGHHGNKCC@AD@?@@??>=<?==??BBGC>?@>?>@ABEINQHBCEDBMWQSSXXJGGGGIIICAAEFGFFFINPRKBCDEHEHLIDGHEDEDDEFFFEEFLPRQLFDDDBBABDFNFA@@@A@@@BBCDFEECCDFThlkjjkurgZQQPMOcjr~Z?@@?AA@@?@?>=;=?=ABBDGGBDFEFDFJMNOQPLILWa`PGILHIGEKOPPONONLLLKKIHFIJIIIFFHIFEFCBC@?A@?>?BCCCBA>>>A@?>>@@@???@?=>>>=<<>>?><==<><=?==<==:98:<<<<=<===<?@=<=>@BCB@BGGFFEECFEDFHEFJJJGHFEGIDBDABEDA@CA>?>;:<>???@A?>>A?===<:;=<=<<=????@@?<:;<<<;;:;<=<?@>=@BDA<;;<=>><=?>=>DB><;;<?@?;>>DCDBACEEEEDDEIOKCAHDC@=>@?>@?>BBA?<@@A?@ABABBB@?BBHGDCCC>@CB@@BGQQ\^QNIDDDFEKKE?DA>@>A?>>@><=><<>@BGHB=?=?@?@EFIGMOFBABDDKTRRTTXHHEEHGIHEAAEIHFFEHNUYHEFEGEEFGJHHCECEDFFGGDCEFIMOMLECBAAAA@@DMFA@?@A@?@ABCDGHFCDFERchihhhoj_TMIFEDGLNUQGCCB@@ADC@?AA@>>>?=BBECCHEAEHV\PFIIKPPMEJPSVHFHLJHHGLNQRQPOONMLLLIGGJGIHHECIHGDFBDB?BB@A@@@DDBB@?>@B>??=?AA>@??@?>>===>>=<==<><==>>>;=<;;<;;;=;=>>==><???@?>?DECCAEHEFHDFGFDFFDEHHGFFGILKDBAA@@?>?BBB>;:9==?>>AA?=<;;<?=9=<<;<:;=>>=<:<::;<==<:::;=>=??>>@BB@<:;<=>><>A?=>CA><;;<;>?><<@BCBCCDABCABDDFE@@EDB?=BEAADB>AA@B>@;AAA@AA@@@@BCEIGFDCA?A@BA?@BJLOVMIGBFJIIHFC?A@>@>BAA?DA<=>=>>@CFEA>@<CA@?AA@AEGDABBCDHPPNRVSGIHHFJIJFACGHIGGGJLTYMGHFCFEFFKKCDEDEFGEDDEFEHIIIKID@BBAA@AACHJC@@AA@?@ACCDHKHDDEEO^dgfgejcXOIEEDCFJLFACA@A?@ABDBBAABAAA?@AEDBCFIBDMhvtRGKIBGOLJGFJJKJMHJMOOSROOOOMMLJJIHHHHGDEHGFDCDEDABBABB@?ACCA@?=?@>??>?>A>@??@?A=<<=>@==<<;<=<;<<;=;;;=>>=>;<==??>>??>>@>:>CDDDCADDGEFGKHHDGEFGEFIJLLLJB?ACB@:<>@BC?::<>?@??@?<:;;;;<;;>;:<=:<=<=;=<;:;<>?=:9;<<>@>=A@??BA@<9<<=>=<?B@=?BA>=<;<;>?>>>@AADFDABCECCBCCCABBA?>@CC@ABBBBB@B@?>@A@>@@@=A@AEIIFEFB?>AACBAACBIMPOJEHRNHFEDEB?>???@A@?=A?A=B@?@BHEBB?>?BA>===?>DDBGEECFIHHIHHFFINHIJIIEEFJHIHHNNURIFEEFEDGFGFCDEEFHEFFFDGILJIIIIEABD@@@A@HVQFBA@AA>@@@BEJNJEEDDMY`eddbe\PIEBDDCEIJEACA@A??@?AABBCFEDBABDEDBBDDGIQ_¯¼tWGDC@DGGGGIJLNNOKLLOOQQONOMMLLLLKIHHGFEFGFHDBEDECBDBCBA?@CA@@><>@@?>??>A????@??>===?==?<:====;;<<;;9===>>=====<??>>>=?@=:<DECB?>ABBBBDIIHDCEFFEEFFIJHFB>?AA?:<??BB@<:>@@A>=>>:;:=?>==>;:=>>=>>?:=;=<:<=>==::;<>?A?>?@>>??=;<;<=>=<@D@=?AA>=<<<<>?>>?AAACDBAA@EDB@B@ACB@>=@AAA?ACEGCCCA@@?AAAA@>@@?>@FIHDBCA>@BBBDABDCJLB@AEJNGCDDFFD@>A@??@@??==>=CBCEDEBDB>=@@>>??=>?CEFJHDEEFFFGHHGEGLHFJIKIKGGIGHHW]]OGEEFFGGEDCDHFIHGGEECDEFKLJIIJGCAABBAA@@EICHB??>?@????@@FLIEDDKU\cca_`UIDAADCBDHICACBAA@@@@AABBCEHGCBBCEECDCGIKLGU£g_UEABBFFFHLNLMPNLINNNPQNLNNLLMLIIHGGHEEEGFDECDEBA@CABA@ABA@@?==?@@??@???>??@@?>>?=>=>=@==<;<<<<;;<;<<<==>>====<???=>>@?<;:ACDC?>BAA@ADFHHDEEEDFCBDFABA??AB@=:=AA@DC;;@CD@=;><<;>ACB>>;;;<==@B>=;=;<=;??B?<;;;;?>CB>>A@>>=>;<<=>><;>CA=@@A>>==<<>?>>ABBBBBA@ABEDB@@@BBB=>=AA>@A??GKFDB?@BCBCBAB?ACD?@BGFDBDA?@BBB@BCCGKHABGJGB@CGHGDCA@BA?@A@?===>>AEDHFDDC@??@?=?@???=CFGJHFDEGFGHFFGGGGGFFHJHHHGGFFGX`\LHGHGGFECABFJKHGEHJFDGEEGHFGGGEDBAA@AA?@A??DH>>>@>@>@@A@BJJEEFINYbfb\[NB?>@CCBCGGCBDBABAAAAAABBCFFEBABCDEEDEIKJEDI`rwW[\FCBBFEEINONNOOMLNNNOOMMNKLMKKJMHIHGDEEEEDDDDEBABCAAB?DAAA@><<>????@@?@>>=>?>>>??<=>>?>>>=:;:;;9:=>=<<<?>=>=<==>;@>?@?>;:@BCCBBEECCC@CFGBBEDDFFDCDAAC=?CB>=<@CCGG@=>AEEAAAA>@@??DC><;=>>=>?>?>;;<<<;>?BB<><?;>=BA><@@>?====>=?><;=CA=?@>B??><=?@>@CCCBA@??BDFDBAA@AAB>?@BDAAA@>EHFEC@ACDDB??ACADGB?>CCBAA??@AAAB@AADHFDGCBCA@EHIDCABAA???@@?>>??=AEEECDBBACC?==@A?>=AJKHHHFDGGEGKECFDCCDDCEGDEDBBBBEMKOKIIIGFFCDEEFJKFEHJKIEFFFEHGFEBCGDCA@@???@@?@EB?@<@>@@@>ABHJFGFEINU^^XVKBA@ACCBBFFDBDCBBBBBBBBBBDEEDA@BCDGHGGJKHEBEEGKGJNLLGHEEHHNMMPONLMOONOONLLLLNJKJJIHGFECEGFFDBCDBCB@ABB@DA@A?===?>??>@?@A@><=??>??>==><??@>=<88:=9:=?==<=>=<=>==>;=>??@;==:ABD?EBDEDC@BDCDBBDFEEGFAC@@D>>=C=;>BEFFB?@?@JLECBA>@DCABA?<=BHD@>;<>=;;<=;;==@@=?>@<>>?>=<=?=ABA@??==@>=;?>>>>BACBB>==<<?EEDCA???BFFDBBA@AAB@ABBC@AAABCGEC@ABA@BB@>?ABD?@>=A@AD@?@A@B??AA@DJIEA??@A?ACECAAB@@@A@ABCC???=@DDEDB?@CD@A=AA????@FHGDDECFHFHIEBAC@?CAABA??@?@A?DLHKIJIGHFEEGHFEFKGFIIEGHHGJGFCEDDEIFBA?@@?@@BA?CFA>=@?AA@ACGNNMMJLJKJPZ`WLJJGFEHJMTPECEDCCCCCCBBBBDDDC@@CDFJKJIKKHFCEEGJGFEPYKFDEHEHLOQNMLMOMMOONMMMNLKKHJFHHFGCEDFDEBDECCCAABBABB@A@<<=>>>><>AA@@?<=??>??>>?>=?=??=<;9=9;=>====;=><<>=<<<>>?@?><>>BACCE@BFCA=?AACB@@AFGC@ABBCC>=@DA?>A?ED@>?>?GJFDA?@ADHGB@;=GBAAC@====;<<<::;<?==CA@>>>?C>A==<A???=@?<<>=:;=>>?@?BCFB>==<?EDB@A@>?CHGDCBA@@ABBCABC@BBBCBFEC@A@?>>==>?@AC>???>=AD??AAB@??ACBBFFBA@??@@?ADAAAAA?BCECACA>@@>@CGFDC==BDA??>@?>>A>BEDDDDBDHIGIGEB@>>A@>A@?@@AA@>EKJKIIJFEFGGFFGGGONIGGFHJIIIECCBBHGIF@@@AA?AAA??AGC?@ABBCDEJPRURX\YONIMYd[SMJKJFCDHOQADJJJGGFDDCCCCCCCB??CEILOMKLKIGDEFHIGFEMUJFEFHFNNNNLLMOPOMNOONNMKLKJJGIDFFHDCEEEEDEBBCAABA@CCA@BB><<>>?=<>@A>@?>><<=>>?@=>=>?>=>;<=>:=<;;=<<=<<=<=<<;:==>>?>>><A@@BA?@DA?<>AADA=<>BA@BA??BD?<?BCBBEBEA?A?=<?GLHEAABEJG@=>BD=@<>>CI@:=A?>;=<;;=@BCAAA@?BC>?<;@C?>:=>>>><;;<>?>??@ADE>?<=??@AABCA@BEDDAABA@ACDB@BC@BBCBBEED@A?>>>=>???@A@AB@?>AE??ACBA@AB@@?@@AA????@@?@BECAB?AFCCBA@@DB?ACEHGB>=EQM@=;@>>C@?EEGLFEB@FIGGDDB@@@@??A@>@@A?@BIJHIIGFDGHEEEEGGJNNJFILLHFHGDCDEBEFFEA@A@@A@>A>@@GEB?BACHLOS]i`WZ^YLNJOX^VSQSWRKFDFLJ@CHFFJLHDGDCCEDCBA??DHLORPMMLJHEEFIIHEEKQIFFHIGNNNNLKMOPMPOPNONLLKJJIGDDCGGFEDFEEDDA@BDCCBABCAABBA?<???>>?@@>@??=>?;=>>???@@>=>>=<=>;==<>;<<=;<:=<<<<=<==>>=????>>?@==@<>>CA?E?>>>>>@D@:;>@>>ACAABDFEABB?<=APTLIEACFEBACDB???<>>:@FGIHB?<<=;;?>=@CFHE?@@A?;;@AA=;<>>A?><<=>>?AB@>??>=;>??A>@DFFFEHCBCBBA@@BA?@BC@CCBAADED@??@??>?@@@@AA@@@ABB@?>@B?C>@?>@>B?ABA@@A@?ABADDDDABBBCAA@AEA?ACBFHDCAVfVA==>=>AC@BDIOB?B?BEGDECCCA@?>>@?>@?@@@CKJFJFEGFECDFDFGHFGJKEIKIFFGHGGFAADDEFACB@ABAA@@CDFEEFDKNONQ\`_\\ZZWKJHP`ZTb\`d[QIFEGHDDFGHNJDHEBCEFEEDA@?AIORVTPOMKIFEGJIGEEINIFHIKINOONLLNOPNPPPNPOLLLJJIIGBDFDFHEEFEBCBDBBBBCCCABCBAA@>???=>@?>>?>?@==>=?>>>>>=>=>@><=<<<;:<=;==<=<;<<<<?:9>>>@?@?=><=>;=??ABB>>B<@A?C@??<9=??>=>?=>?AEBB@>>;>DRZULFFIIKKHFB>??===<<=>AHHB?<?=<<<><>EKLI@<@@?==??@??>>@@D<:<>?=?AA??>?><=@>?>@ADGFHEEC@DCB@ACB?=@ACB@@@@ACEE@@A@@@>@A@?ABB@?@AEC@@@@??C?@A>A?FFCC@BDGGBBCCDDEGEBCB@??AC@BB@@AAHHELedMA>==?@@BAEGBA>?@?BADFDADBAA@?@A@>?BB?@ELKGLIJGFCCADCEEJHGIKGGFHFGHGHHIFFGEFFBAECAABCCDEEGEFLMLMMJJLLPRSV]\JJLVbIKYbo^QNDCCFNJDHHEGGFIBBCDDEED@?@ELRQTYUQQLJHFHKHFFEGJHHIKLKOOONMNOPQPQPPNONLKKJIKGGEDEEEEDDDDACAA@AABCDAABBB@A?=>??=>?>@@@>?>>>>>?=?>>>=>=??>==>==<<==;<===9;:===<8<>?????>?<?A>;<=AA>@==?:=?>@?;;;<<>=;:;<=AAA@?A><<:>BJNLFAA@CGBE?<;>?====<<<;>AEB@<==?9:@?BGIEA@???>>;>@@>@@?DA<==???>?@?>@@=;=><=A?ACCDGHGB>?BB?AFEB?BDCBBBA?AEFEBDCAAA?B@??ACC??@AID@ABA@?C@AA?ABDGEC@ABFIB@BBCCDGGDDDAAAAB?@C?@@@BHGL`RFA>>>?A@BDDFA>??A@BAAEDDBACA>A???@ACB>@FKJJNHHHHEDCCDFBNPIEIIEFFEFJIHIGFGEDDBAEIFBBCCCECCEDINHIJHFIJHJIHLRRNJLY]GEJJTOKIAABKPMBBCBDGFDCCDDCDEDEBBJOROQWNOQNLLMMIDEHFEGHIKMNMOPOONOPQQQQPPNNNLKKJHJFFDDDEEFEDDBCECCAA@@CC@@BAAA@=;>???>>@@A?>??=>>=>=>?>==>???=>?@?>=>>>;==<>;:<=<>><<?@?=??>D@@C<<?@?==><<=;=;;>>::9<<?<<;=@@?@CB?=<=><<?DFGD<<<>??C?=<;===>>??<;;<;>@A?>?:9=>?BDA@@==>>=<;>AAAABA?<B@?>@D@@A??@=;<==?BBEB@BAHHG@?CEBBCCFADFCEEBA@ADDFFFGA@@CDA>?BDD??@DLE@BBAA@CABA@BCCECA@@BDGA@BACADFGIKLIFCCCA@A@BAACCGELME>@?>@@>@AADD??AA??CADDCDCC@=BAB@AB@A@CFFEGLIJJHEDCBEHSOVKDGJLMIFDFIGGHHCBCA?BCDCCBBCDCBBEILHGIJGHJGIIGHHHIHEMVQHIFCDCGLCCFQLIABBCCEBDEDDBACEECCFNOPPNWMLNMKMPNKEGIEHHFHMPPOPQPPPQQRRRQQPNNMLKKIHIFEDDDEEEEDDDEEDBBA@?CCA@AABAA>=>??@@>@B?=>?@??>?>=?=>?<>?=??>>?>====<;==<;<<:==???>???><??E?@?9=AA?=;<=<;;;<?>;::;=>?;=<??@CEFC?>@?@@<=@DJH?;=>=>>>=>;<;;;=<>>=<;;;:?B>><;;?@A@>CB====>>=?AB@@BA>>BA@>@F@@CA??<<<>=>@BCA?@AEHHEDCCEFDDD>>BCCCAABCDGHGFDBA@DE@??ABC@>@HPGADCBBACBCBABDBCB@@@ADFBABA@@BFHKLMKJHFDAAB?@??@@BDOOA>A?>>?>B?AEDA@@?>?BABDBCCC@>C@@?ABACBFGCBDFIIIIFDDEFIXWYQFKKPKHDCFHIHHGC@@???AAAABABCAACILHHHHGFGHGDGHJJIHGCPODBEDCBAFPLMNRJICDDDDABDEDDBBAADIJLNLJPRPKKNLJGNMKIHGEHJJMRQPRQRRQRSSSSRQQPNMMLJJIHHEEDDDEEEEDDEDDDBBAAABBAB@BA@@><?@?@?@A@?>?@@????>>=>=?=?>?@?>?>:<>>>=<;;==<=<===?<A=<?>>>?A@@<9===<<<==<;;==>=;;<<@?<;>>A@@EEA>>=AB@A<<@BC@=;<?>>?;=>=<<<?<:<=;>;<;9;@@====>>@=>@?<<<<><>BBA@ACCA?@BB@=A?AAA=?=<<@?@?BBBAA@AFHHGDCECDC@>=>D?AAADDEGGECBDDEBB@?AAAA?BBGHBDDFCCBDCDCBCCAAA@@?ADFCCBA@@ADGIJIIHGCA@@@?>><<=>@BEC>A>>>>><CCDCDB@???@ABDCBCDB?A@ACDCABEFGDABA@@ACDDEFDEOWXPAEGIFEBDHKGILLEAAA??ABCCBABCA@CLKEEFFDEGHGFEILGHDFHXHBCDDB@BHNNMOPJFB>CDECADDBCAA@ADGMOMLKONMMOULFIMHHJIEGJMRTTRQSTSRRSVUSSRRQPOMMKJJIHGEDDDDEEEEDEEDDDCBBBABAAA@AAAA?<?@??@AB=>>??A@=>?@?>=>?<@>?>@=@?:>=>=??=;=><<=====>?>;=?>A?>?>;9=<<=<=?;;<<>;=;<;<?@A=:?@@>?D?@?B=@?@?::<?@><;;=?@?=>?>==A?=;:;<=??<;:;A@<<=>=><>=:=?<@AFGHHC@?=@@=?A?@>?AB@><>;<;A@@?BECCCBBGIKLIDBBB@??@?AABA??BHHGFEEFFDAAAA@@?AEDDB=BFCCCDBCDEDCDCA?@@@?ADFDCBAA@ACFHHGFFEB@@@?>><;<<=>>ABAA>=?=<@?CCCGC>@AA?BBCDCCEDBCA>DDCBB=CDDA@?????@@AAACGJLIDEDEGEEHIHEKOOF@@@@ACDDCDBAACCBJLDEEFEFHHFFFHJFFCDP_TRIEEDBBFIIKMMMJDABDDIFDABCABCADHONMMLKJJKQULCDJGFIGJJKRUVTUUVVUUVVWVTSSSROPMKKJJJHGEDDDDEEEEEEEDDDCCCBAB@A@@AA@@>=?@@@>@A;<?@@???>?@@?><<=>==>?A@>==???>>>>><====<<>??><=?>>><<;=;;;=?==><=<>;<>=<;=???=<??@@>??ABA>>=@;8;;?@@==<=@A?=?AA??@>>;<;=?AB?=<8?CC><>?=<>;;CGDCCCCBCBDA>?A;;?>=>?@A??>;:<>B@@?BBABECBCEIMIEBDC@>@@?>A@@><@BFFHHGFGEA@@?=>AEFB@?=CE@BJHFCAEEFGFA@@A@?BEFECBAB@@BDFFEDDCA?@@?>><<O_PA?>?ABA?A>=?@BCDDAABAA@BBCEBCEFEC@?CBBAA?CCFA?@?@@???CEDBEGEDCCEEGGGDJFJLOND@B?AAABEECAABBBBDIJGDFEHGFFFIJHCDBGTaw{hXOFC@BDIIJJLLGCCCEIJFCBFFGDCISOGKMKMLHGMPLFCEGJKINLMUVWVYXXXYZZYXYYUTTPNOLLJLILHECCEDDEEEEEEEDDDDDCBAB@A@@AA@?>>?@@?>??;<>A@@>?A?>?>=>=====?>@??>?>@>?=><?=>:<<:<>@><=>@?>=<<===;:<=<=>>>>=<>A=;;>?>??<>??@?==?><<=;<89==<@=A<>?AB>>@A?=>>=>==:<CFB@@>9<@BCA@>=>@>AIJB?B@@B>?ED?=??<>?>=@@??B@;<?@B@?<??B?CEDDCEGHGFEFCAA?BDE?>>=@?DCGFEEECAAAAABCABB@>CHC@CPMGECEFFEFB?@@?@CCEEFCBC@@ACEDCBBA@?@@???==csN@>?@A@??@=A?@BGD@?B@@BBDEFEDFHIFBAAAA@ACCCF@@=@A?=?>ACCCEFEBCCBCFHEDGJNONKG@B?BCBDEECBAABA@BFIIIGEEFEEEHHDCFBM\]w|_IBACBAADEGFCADEFGGDDHFHECKPKLNKKHJFFIMMIDEKLJILLNTWXY\]YZ\]Z\[YXWUURMLLJJKIIFEDCHDDEEFFDFEDDDEDCAAB?A@@A@??>>?A@?>?=<<>@??>>@??=><?>=>=>>>>@??>>>>=>><<;;<<<:=>@?>=>?>==<>=;>=:;<=<?=?><<??<9;<>>?A=?>>BB>==<<>><<:9=>=?@@=?A?>>=CEA?@ABA>=;<>?ABB?==<=BBDCBEHHCC?>ACBCD?;=DC=?>>>=<=@@>>@A@?@?>>>@A?BCBDDBBCEIHIGFGE@AEDC@=?ABEGDFEDEDA@BCDEB??@A>?AB@>AC@BCDDGDFE@@@>>@BBCEEECDA>?BDBA@@???@@???=Pv¥\A?@@@???@???@AHD?@A?@CFFGGFDHHHFC@@@@?@BEFC@AA??@>>>@AADACCCC@AACGHIIKNNHIFBCBDFECHCBDAACC@DECDLNIFDFFEEDDCDCYUPTchqM?B>A?AABBABDFFEEEEDEGFJLJLKMGJIIHGEEEFGKNJGJMOMRYYZ\]Y\\]ZZYXZXWURONLIIJIIFGFEEEEFDECEDDEDDDFDABB?A@@A@?>>>?AA?>?=<<>?>>>>??>=>=>>===??>????=?>==@==>:;=<=;>>?@@>=>>?><==;=<;;==>?@?>=@@;89<<?>>==>=?B@>>=<<?A<>=:<<=B=>>??>;=<EIFAAACA====<;@B@@A?<=@A@@=@EFA@AAA@AEEB@?>A@=>=>;:?>@@<>>>@@><;>@@?ADDFGEFGGGFDGFED@?@CB@@@@BBCFFECA@@CCCCBDB?@BA@A@??@A>ABDEGFHDBA?@ADBCECDEDBBAABCBAA??>=@A?@@>dÈ²jB?@??>?@@A>?@?EC@?@?ACHEEFECGHGEE?A@@ADEC@>@?@??A???@BBA@CBBDA@ACFIIIKLJHKICFEGFHCD@CC@CBAAEEA?CLPNJGGEEEDCDJZLIIRN[R@?><?>B?B@CCDFEDEFEEFGILLIKIGJKJIFECFIGJKHHJMKJRYY[[^[XZYWXWYYXYUTSQPMLKIIIGHFDDEBECBDCDDDADECAAB?@AAA@?>>>?AA?>?==<>>>>=>?>>=>>>>>==>>>?>>?><=>??>>=<<<=<<?=A?@?=>?=?<<><=;:;==???>>@CA<;;==>><:>===C@@=?>?DE?==:<?=>><<<==>;=DHFB?@?B?><?<:>??ABA<;>A?A>=@CABDEE@?ECAAB>>CA><==<?@?@??<?@??<=>?>>@ACCEFEHGEEFEFAA@>?EHA@@??ACEEDD@DEBDA?ACHD@CA@AECA?=?BCDGJMKEBDADDCCBDCDDCBCDCCBAAB@@@=?A?>?ASìÎxC@??>=?A@?=?@>CCA???AAECEEDEFGDAC@@@@AFBA>>@????@>>@ACBBABBABBBBDFHHIHGHJNIDGJHDEEFGGBCCBABEBA>?EJPNGEDDDDCFQYHHHJILczoIA>>??>BBBCEDEEFFFHEDFIKIGGHGEFIFIFE@AEJKKIHHHIMSVZ[[]]ZZWVUXWZWWUTRRRQNLIHJKHFEDDDCCCDEEEDCCCBA@AAB@@@???A@@BB???>=<======>===>>>>>>=>=>?>>>=<=>>>?><=;=<=<>==??>>???><=>==:;;=>@??>>AB@<<=?>><::?<>=@?=BFC?BA?>;9<>AA=>=<=@=:>ADE@ACDCB@<>>=><?BB@>=<??A@>?AA@AADB>AABAEA>BCA=>@???>?>??@A@>>ACCCAAABCEGGKHHHGCB@?A?@HKEB@>?@ABBEDFJCBCA@CBGIAB>@BECB?=?DDDFJNLIHIFEDDBCEACDCAACBBCCCA@AA@???;?DWÅ¨xC@A?>=?BA><?><AB@>??A@CBEDCDDDAAB?@A?CECBBBA@?>?>>?@AACBBABA?DCAEGINLLJHKLDFKKHFEEHKNHEB@A@CD@>A>@GNHCCDCCCKUTIFCCCECHGDA@@AAAFHEABCEDCEGFFDGMJFEGGFFGJKGFC?BKLMMLIHJJNRTYZ[]\[XUVVXWYWVWRRQUPONIJLMIHFEFECCCCCDCEDDAC@ABAB@?@>>?@@@AA??@@>==<========>>>>?>===??>>>=<=>>>?><=;=<<<=<>>>>?@=?<=;?>=:<<>?A?>=>BB?==>?==?;;>>??@><DGC?<=?<;9=?DA=>BA?>>??BDCA>@?AA><??C?;=ACA?>==>>@@>>?A?==<<=>?>B@??>ABEFEDA@A?>?@@AACCBEDDABDDHGHIFDAA?@@@??BFGHHB@?@A@?BEFB>AAA@ACCECB@ACDC@>?CCCCDEFGHJJIFCABCCBDBDABABBCBBCCBA@?CC?AE]_k^F@@??<=?><;?<;?B@>>??>ABEDBCBB?AA?@@?BCBBABD@@>><>??AAB@?ABA@CDEDFIONMLJLLHJLKLJGCEJMICCAACEE@??A@FNGCEEDDCPTICBCBBCBCBBD>ABBCHFFCCCCDCCDCCDINFEGGGGHHGGEBBCIMNNPNLOKKOPOUWZY[[WVWXXXWXUTSRPRPQONJKLIIHHFDDCCCADCCCCACA@CABAAA>?@@@@A@>?@?>>><==>====>?>>>??==>??>>>===?>>?>==;=<<<<<>==>@???>=<@??;<>@CB@>=>DA>>>??=>B==>>???=;A@@<;<@==9>AC><>CCBA@>?CGIA===>?>@?CAA?<>BCA?>=<<=AC@=?@>>?>>>?>DC?<:;=<?CDDDA><===AAB>?ACCBACFEEFECABA@ABB@?@BHIJEDCADDCB?=?????@AABACCC?EBC>?ADDCCCCCCFIHHECCADBBDDDACBCCCAAAABA@@DB@DEFICGHC>>;=:=<<<<B>=AEC>>?>=?BECAB@@?A@?@@?BBABABC@@>?>>?ACA@FHDBAADFEDEFKMJIJKKFJNLLGDBFHHECDCCDHD?@ABGOJHHHKIGJXPCAEFCBCDBCFECCEACEGHDDCCDCBBACDIKFDGGHHIEB@ABCHOQOMNLMLLPMMMPTXY\[[ZZ[ZZXXTSQRNQPQQMLJKIIHJGGFDDCBCDCCBABA?B@C@CA>?B@@@B@????@@><=<>=======>?@@>=>??>=>===?>>?>>=<==<<<<><=>?>>>=>@BA?;;>ADB@=>@C?>?@@?=AE?>>>???=;?>?<:;?<;:;ACA<??CCFD><@DFDA@>?@@@>BEFC====?>>>=<=ABA=<>=<=@BBDACC@==<<;?FEAAAA??<;=@A???ABA@BCBACA@C>??ABBCCABDDGHFCAHHGD>?A??A@@AABABCBB@@@?@CCCBBBBB@CCFGEDCDDDCDCDACCACBAACCBBCDDBBDDC@BCFB??>>><:<=<>>BDGC?>>==?BECAA>>?A??@??@AABABB@@?A@@@BB@@EEEBCCDFEFFDGLJJJIGGIOKJEA@CHIDDDCBBC@?AFMPLLNMLNMKQ[L@?@AA@BCDDCFHGFEDECHEBDEDBA?ABBGGDFFFGHG@?@ABGMQQMMLLMNQQMMLNQYZ^^]^]^]ZYXURQONPORPNLLLKHGIKIGEDCBBBDDBA@>@@@B?AA?AA?A@@@==@@?>=?=<=>><>>==>?@????@@>=>===?>>?>>=<===<<<>;<=>>>=<CDB?;;==BCA?>@AAA?@AA?=AIA@>=???=;==><:;><;:<?CA===ABDB<<=@ABA@@AA?;;?@?@>;@==<<?A?@@?@><<><<@DDA?B@?@>?=<ADE@@ACA><;;;;=>==>@?CFBBAAAA???>@@GEABBBFHEBDCEFA>??@AA@@@@@@ADC>@@AEBBDBBAAAB?@?DFFEDCDDDEEDCCBCDADACBBBBCEC@A@@ACIJFEB<><>>>==<=@AA?AB=<=@BDDDB?ABA??@???@@BAAA@@@BBBACB@@DDDBBBCEFGEEGKKJKIFIEJIIDB@?DIGDBAEEFCBHOOMMMOONPOJXYOHEAA?@BCFFCEIIGIGDCFCCCC?AAAAAFFFHFEFHFC?>?@CKSSSQPPPOQQRPKKLLYY^^^_]]][YYWTQPONNRQOMLLJIGIIIFEEDDDDDDDA@A@B@@?A>>@@??@B@=<@??>>>>=>>==>>=;>?@??>?>@>==>?>@>>??>=<===<<<>:<=>==<<AA?=<<?ABABB@???@<??FD?BNE@====?=;;=><::=<::<>CB>>=@BDC>=?A?==>?A@>;99988:>@>?<;>?@AA@C@><><9BGC@@>AB@??<>@@A???>A?>><;<<;<==???BCB@?@A@@?@BACA?BAA@BCBAACB>?@BAA@B?@AAAABB?=?CFEDB=A?AA@DA@CDEBAABCCEFEEEDEDC@CBBCCBBBA?@>@BEJJHHDA@BCC>=<:=>@?@@@=?A?BHIKHEFGDA?>>>??@BA@A@@ADDDBBA@@CCCBBBCEEFEDFIIIIIIJGHGGD??@BIIECACEGCHNKLRPLLNNVd]YQSOQPGDBABFGDEGGFFFCBAADCC???@@AGIFFEEGHFA@@@ACLSUSRTRQQOQQLLIKNV[]^_^]_]^[XWUTOOMMRTPLNJIIJKKIFFHGEFEEEEDBCA@BA?>@??@>@B?A?>@??>=>>>?>>@?>>:=?@@?>?=?>>=>=>??>>>?>==>==<<>9;====;;>?==<;>BAAADB>>@><?@BFBDKIC?=<>?><;=>=::<<9:;=CC?>=?CDD@>@@?=>?A@@?8566437;?<@@:<?BFLFHD?=?><EGA>>>AC@>??@AC@@<<>?B?@==;>;<<<=>>>AA@@?@?ACBDDD>@ABDACA??@BB@?@AAAAA@?B?BC?@@>=@ABDC@B?A@@BC@CDCABCDCBCDDCDDDDBCEEEDDDDD@BDBEEDJHFEDFGGGE?;<:<?A@@?>@CCADDAGEDHIJHC@==??>@A@ABABFFFCBA@@BBBAABBDEFEDEHHIIIIJGGFED=AHFHIGFECCHELJFHLJGEFGWqbTOKEKZUQHCC@AAEEFGDA>?@@CEC??@BBAHJGIIGIHDAAC@BGPTRPNKJMOPMOMJFMYYZ^^`a^^][ZWWSTPPNNRTQPOKIIIJLIGGHGGIGGEEEBDCAA@??>?@@>ACA@@>@@>><>==>>?@?>=<=>@@???@??>====?>>=>>==>>>==<?9;==<<::=>=C;:?@?@??@==>>>?@?ABGIHJGA=>?>=;:<;;:;;:::<CD@>=@CDEB?@@@>?@CB@=8555439<;?CA;<>FSXTTMD><<>IC====?@@?@AAACDA><<@??>>?>A@<==>>><>AAA?A@AA@EB>?ACIGDBDG@?A@@AA@AAA@AAAAAA@??=<<?ACCABBA@@A@CEEB@ECECCBBCEDDDDCDEFFDEEEDADGEHEIHGFDDFEEDED@=>=<>??B?BCDDHBADCBEDFEDCA?@A=>B@?B@FGHGCBA@ABAAAABBDDEDCEFGIIIIJGFEDA=@FEFGIHCDAEKOIDACBAACCALWVODBFLR[YFCC?D@BDE?@>?@@@?A@>>@CBFIIHHGIGD@ABCJORQPJDA@CFHMOLIGQ]WY_`ab_^[YXYUTQPPMPRTQPPLJIJJIIHGFJHHHGEEFBDDABAA?A@>>?@AAB=>@@@>>==<><>@?==?>>@A???@>?=>>>=><?==>==>>>===>;9;<<<::?>@@:;>>?<??>=><<@A>>@AEHIJLD???@==:;;;9:;;99=BA@==@DEFE@A@@?@AEC?<854436:=<?A?><@R]Z]e`L?<>EH?>;>??>>>@?>ACEC=;?B>>>>A??>=?>???@@@@@?AB@@??B@BBGIHBCFHFB@@B?A@@A@AAABBA@??=>?;??B@ACDBBCA@ACD@@BBDBEACCDDCCDBDFFEEEEEEEIFEGGFIFFEFDDEFHFEC@?>=?@BAAEDEG@BFAADCEDBEDCCA>@A????FLEDCC@@AAAAAABBDDEDCDEFIIIIJGEDC?=@DDEFFJHHEHLQMD@@@@ACCAQVRLBCFEGRZKCAB??@AA>>@@>@?????>>A@DRTGEFJHACCGOSSSQJC@>>??@FLJGHPUPW_aba][XWXYZWSONNRVUSROLKHIJIIIGGIHGGFGFDECC@CBA@@@?@@@????=??>?><=<>=>?<<>@>?????@AA?>=>>=??><>>=>=>?==<<:9:;;;9:>?>>;<?===>@@A><=@=>>>@CHGGHC???>?::=;;=9;;:<??@A??CDFFEABBA@ACHA=:853348;>=?@>==BUb`]bgJAA?AC=><?>>??==?>?BCA?>>?>>@??A=<>?><=;@?>=?ABAABA@@???CEIDCFHJDA@ABA?@AA@AA@AA?>?><==@AA>@CEACECA@A@A@ACCCDBEDDCCCDCCIJFEEEFFEHGGGHLKJGEGFGGFHGFDB?==??BFFCCFEAAD@@ECCECCCEGFEDCA@>?EGDCBA@@A@@@A@?ADEEDCDDEIJIIJGDCB?>?CCCEDLMLIKOONFBCEFDBCCYTKIDCDCELTQF@>?=@A@@?>A@DAAA@?@?@BGIGEFFGECCENSTTTKC@??>@?@BFJHLTWUZ]_a_\XVUXZZURSMPTVVUTPNMJIJIHHGGGGGFGFEDDBC@CDAB@@?@?@@??>>>>???>><=<;>;=>>@A?@?@A@@@>==>>>===?==>=??=<=<><;::989>??>;<>>?????A>?>A:<><>@?>AEA?>?>;9=@<<<;=??ADA@CEAABDC??ABA?@@B<89853369<?>??>=?EXgg^c`IBA>@>=?=>==?A>@@>>@A@><;<<=AB><====<==<<<>?A?@BDCB@ACA??BDCGHHICFC@AA>@@@A@C?@>==><<>?@BC@?CEB@BEC?@@ACAAACBABCDEBDBCCEGGEFCDGEGHGGGMLHGDEDDGFFFFDB@=?A@EHCABDC@CEBAEDDEECBCE@@@ABC?>EHEA@A?@@@A???@BACEBDDBCGJKJKHDBA?>?ABBCFORPMNSNOHEGJLJFEDUPHGFBBBAEKLEAA=>@@@@>?ADEABA??@>CGHFEDCDDBBDKSSUVOC???A@@??FIKJMRQQW[\a^ZXUW\_[XSWPRTWURRQONKJKIIIHGGFGGGFECDCC?CECCB@?@@@@??>==>?>>?==<=<>:=>@>@?@?>@A@?=<=??==>??<==<?=><==;=::9867??=;;==>AB==>BBBC?;=?>=?>>@CAA@@?:<B?;:=<=@CGD?@BFA?ACEC>>@BC@?=::;;6347<>@@@>>?@H[ln_`ZHCA>@>=?==<<?B@@CA=>??>=;<;<@A?????=>@@<;>@??@AADCCA@@AA@BEFHIHGDJHD>@>?>@>?@??>?>=<=?@AEE??ABCAA@@A?>CIGBCCABBDFDDCDDBEHHHHGEHHIGFEFHHFDDEEHFFEDGD??>@BEDHFBCEC@AC@BECBFECC@@?><?BDB?DGCAB@>?@@@@>@A@AAGGDABBEIIIIE@?????@AAAIQWTQQQOPJGKPRPKHFQMFEDABBBDCCBCB>?A@@???CGC?@A?@?AFJFAADEDCBBFPTTWQE??@?@@@?@HLLONKOTWY\`^ZWV[cbYVUVRSUWSTRRPOMIIIHGGGGGEHFGEDDBBADDCDCBAA@A???>=>>>?==>>=<<;:>>?><>>@=??=<==>?>;=?>?=?=?=>=<=:=<;:8689@>;;=?=>A@?<<?ABCC;=BA>=B@>@ABDD>=AA>;:=<;AGG@<?>@><@@BF@==@E@<<99=>;757:?>>><<@BK_ru`YSGDA>@>>?>=<<>A@@CB>==?<<;;=<=>>>??@@???A?@A@@AABCCC@??BABEEFFHJGGJIA@?>>>?@??@@BC@CDBB@?ADA?BBA@AA?@??GFFDDAABCFDCBCCBADGHHHGIFGGGFEGKJIGCDFEABA@B@9?>ACBDFDCFFBAC@?CECCDDCD>?@A?=BCB@EDBBB@>@@?@@??A>ABIG?A@EFHFGEA???==?A@AAET\XVUPPQLJOUXUOKGNIDCCABCCCBBABA>?@ABA?@?@B?????AEFGFAEIGCBDBJTUUTJB?@@@?@@?ALNOMMHIQVX_`\ZY]ad_[XVUSSTTUSRRRPNLJHIGGGGFEGGGGFED?ACDCECABA@@@?A>=?=<==<=>>><:;==>=>>=@@>C>==>?>>>>????=>>>===<=;;;:787:?<;=@???AA@?==>AB>;?BC@>A<??=@DB?=?=<=<;>EHHC=?<==9<AA=??;<===<<9:?@=679<<==:<<@EKYegVQMGFB>@???>=<;>A@ADC@?=><<;;<<=?@?=>>?=>@@CCAABABCABB??@@?BCC@@FIIKJGC>?=>>?>?@?ABBCGFFDC@BEB?BCABB?=>@ABEDBC@AACEDECCDCBDHIHGFGFEFIHFGJIHFCDE@=@?>===BBCCBCGGEFFD?A@@DEBBFEBC>>BB@?BBEDFC@@AA@A@?????@?AJL?<=?EEGFCA>A>>>?@BBABET_ZVUONROMS[_YTNIJFBAB@BCDBBA@A@>?@@AA????@AB@BDFEBAAABHDAABBMTUTMDABAA@?@??DKMMIGFKQS[``^\^cda_]YWWTSTVVSSSVSMJJKHHGGGGFEFFGFEC@ADCEFDABAA??@@?=??=>>><?>==::<<=??>>>@@A==>??=>==>?@@???>====;<<;:978<=<<<C>B?@?@@><<@>;;?@AA@@;B?>>>@A>>??ACILFBA@A@>>=9=@@;;>=<==<=;;=?>:68;==<=:<<ACFQYbWVOED=@B@@@?=<;>A@ADDB@>>=<<;<<=??><===;;?@BB@@ACEEAAC???A@?AAAACFGJJHC??>==??@BCCBCFGGFEC?BDBACBCCC@>?BBCCDAB?AAABECCEFCDEHLJHFGHJIJIEDGEEEEFFB@>>>>?CCCDDDDHHEEJA?CA@CCACD@?@@@BBCDEDHEEB?@?A@?@@>@@AABHLG>==@ACEGB@>>=>@@AAACADS_\SSZPTODNV_aYQKGC@@A@BDEAA@@@@??@@AA????@@A@CDFDBA?A>CAABAFOSRNHDDCA?@@@>?BJJJJFDHKR\aa\_bbbb`]ZVVURSVSRSSVSNMNLJGHGHHGFFEGFFGDCDDDDBCACB@@@@@>?><?>><><>::;<;=>??>>??=>>??>=>>=>?@==?>>>===<;<;:;99><;;=??@=B@A?B?<==<??>@?==<??C?@?CCDEBDCA?=;=???>?@;8=A<;=>;>?=<:<==>;;=>===;;;=@ABLX[QMD@=??@?@BC?>>?A@BEEDA>>=<<;<<>??><<<;:9<=??@AAAEFCGKE>>AA?BCBBCJEEHC??=>==??@CEDDDFGFEC@@@CDDDDDBBDCDBABACB@A@AADCCBDFDEDJLKJIKKIIIHDEFFHGFDFHE?>?AABCBCDCEHIDEJB@EA=BDBEGBCBCDECCGHEFD@B?B@@@@A>@@@AAGIC?>>>BCBEGD?>>>>@?C@ABCDJQTUWYUX[RT[]WJEAADEB@@BEFA@??????@@AA?>???@@ADEFDBB?@>BAA@CGSSNHDBAAA@@@@@?EMNMNHGGKR]ca_bbdcca^[WWVSTUSSUTUTOLLKKGGGHGIGGFGEGHGFEEECCDCED@@?AA??===?>=<=<;;<==<=>>>>===>??@>>>=<>>?>>???>>>===:9998;>==<>@A?>A=AHIB<=?@BC@>===>@ADGCEHHC@>=<<><===>>>??;9;<=;:;:>?<>;<<;<<<>?=<<;;<=>?FPXVFB@@>:>?<???@>>ACBADDCB?>>==<<<>??>;;:998:;<<>?ADJKMOTK@>>?@BCAEDGEADB??>>>=>>>@@@ABEHEDDA?ABECEFEDDLNGBCCCCBA@@BBBEDCDEDDEGHJIHIIHIIJEGIFEEEEGGGBBBBAA@B?CBDFECFDA@EDR\GDHEBDABBEDAGKEDD@@@BA?BA>>@?@BCID>>>>>ACCDEE>=>=>??@BAEFHIQNOSUTXWV^\WKC@ACEFDA?BFHD???>?@@@@AA?>????@AFFFCCC?@?AA@@CGPPKFABC@A?@??@CKOMKJGFGJT_eeeefgdea_^YYXVXVUTTUVUQONMLIIHIGHHGFGGHHGHFEEBCCCEDCCC@@>@>=<==>=<::=<==>><=?>=<=?@@@?>><=?>??>?@==>?>=<99:::::>==@B@?BA?ILF?;=>ABA?=;>@@CJMNLEDC>==;=<>==<;<@@==;8:<=<::<??B@=>=>=@==<<<=>>>=>@DLPKA=AAB<=A=?>>@><@??@ADEEA==<=?>=???>;98786889<=>BHOPRZ_UMEEDA?>AFHFE@@@@BB@>A>?@A@??CFFEEDB@BBBDDFFGETMDDEFFFFECA@ACDDCDDBEEEGIHHIKIIGIGIIGFDEGDFFCCBCCBDB@CACJECJNDEGHTWCBCA@E@BADCBFGCBBABABA@C?@=A@@CKH@==><=AACCDE@>>=??>BEGGGJJONLKTWZ][__ZPA>?BBEBA@?CED@>@A@>>?@AA?>?>>??BGGEBDD???A@?@CGNMHC@AB@@???C>FLIGFGHHINWagijjjjggba\[ZZYZVVVVUWUQPPOOKIHIFGJGGFJGHJIGGFDDDEEBCCBB??A?>;?>=>=;:===<>===>==>=>>@?>>?=<>>?@>?>><>??=;9;<;;;;C@>???>BABHD@>==>>A@?>?CDEDFFGEDEE@>>=;:@@<;=;=?=>=9:=?><<<=@??>=>>=>>><<9;>==<=?AAA@@>@A=>=@?>=?==??@?ABCFGA<<?@?@ACB?=976675668;<<CLTV`ej`[MMJFA?@EFDBAA@@DAAADDCBBA@@BFFDCCA@BBCCCEDFGJFCEFDIEDCDBCACDDDCCDEFABDBBBBCCACAEIECCEECDFEDBACCEEDDBFKEEToTIGCDC@@BD?CAA?BBABDA?A@AAACABBA@@BEHDA<>>=>>??@ABED@?>?>=ADGGIIJRQLOS[Y`XVZ[WH=?CBEDBB?@EG?@DCA????BA??>>>??CIHDAEE??@@?>@DHKJEA@AA@@??@ECLQMHCHKJPW_fikljjkhgdc_]\[[ZZXVVWWURSSQPMJIGFGFFHHHHHHIIHEDDDFDDDBBC???@==>>=>>:====<<<?=======<>@?>?===??>=><=?>?>>;9<;<:9<F@A@??@A>?CABD@@><>?>CDFB?>?>@BEIHA<==<<>@=;?;=?=<<98;?@>@A@AA?=;=?=>AB?=<=A?=<=>>@@?@@><<?>?@@==?AC@@@?AADGA<@@?@DIG@@B=95664557;;;DPZdnpujhTSMEDA@EECA@@@ACBBCCBDBDAAABGECCC?=@CCDDDDEHHCDEGEHCECDBDDC@@@BA?AC?>?===?AACAAEHCJMGDDDDDFEC@??ABACIKP]auVEA?@B?@CB@BA>?ABABEB@A@AAACDB@@@?CHH?<>??@A=?A@BFEGFA>=>?ADEEFGHIMSSU]W`OMSVXNC@@BDFBCCBED>?D?B@?>>?>?>??>@@FKFBAFF??A?>=@DHIGBA@@@@@??BGHRVRMIMPOT[ahjlkjjkkiffba]]]\\ZXXZXVTUVSRNJIHGFFFGGGIGIIIHGDCFEDDCBCB???@><>@>?<<>><>;<<??>>=>=>==??>?>=??@@>=>>=>@>>97<:;<;;B@E@<A@@=<=>FE@@>=>>AFIB<=>==<??CE@<<<>=;<<;<9=?>;::9<>>>BCA?A?;;===?ABA?><B@>==>=>>=A@@@?ACBA@??A@A?@=ADEDC@?CB@BEHHDDE?;6646778:;;Qbn}}{uv\TLHGB@DCB@@@ABCCCBBABAA@@@BFDCED?>?ACDCDEDDEEBCEEDDBBCAEB@>B?B@AAA?=>===>=ACDADIBPYJEDFDDGGD@>BEDBCHLJINSFDAAAB?@CDA?A@@@@BEEB@A@@A@@AAABAACD@><?CA=?>@DBELFCCDB>?A?@CCEFECHVVSVW`URVSSNCBACDCC@AEFB??AAA>@??@>?AB>>>AEEBBAFF@AA@>=@EIGDBA@@?@@?@CJNX[WRORUUX_ehilkjkkjjhhgcba`^]YY[\[VTVVSPNKIHHFFFHHGIIKJHHGDFFGEDBDCC@?@?=>>???><>><=;<>?=?>=?=<=>>?>??==?A@?==<<<=<<:8=:=;9<AEF??A?@>>=>HDABA?ABCFB>=>>A=<=AC>===>==<<;;<=><<<<;<:;=?AB@@>><<==>>?@@==<=====;<<><@ACEDDEEC@>@BB@=?=ABFGB@=CBCFIJHFFDA<7655779::@L\s~reOLKJD@DBA?@@BCDCCAA@A@????ADBBBA@?@ABCDEEEEEEBBDECACCBBCBBDDBDBB@A@>>>=<>>@@CADKHOWJEFHFDCCDA>ADDDEHFABDC@CBAACB@CC?@CA@@BBFGB@AAA@>?AAACDDA>>>=?B@>BBCC@DD@?A@DB?@@BCCDDFLTYPJNVYUPWSPNHBCCDA@?ADHEBBBBB@@@@@?@@A?A=DC@BEEDCBA@?>>AEKGBAA@@?@@@AELS^`\WVXZZ]cghillklkkjhhgdcbb^\]]_\[URVVQMOLMHGIHGGGHGHLIGGFGDFFEEDDDBA??>==>>?>==>?<<===A>??=><===>@=??@??@@A>==:<<89998;<:;<DFEDEE>B???>BCFFDCBC@@A=====<=>BBCA>>==<<;89<>>>;<<<;=?>AA?B??<=:;<<>>?>;<<=<>=<=>@<=>A?B>>BCCA>=@DA=>>?>CEBBACEGKOLGDFEC>878778:<==GTo£»ldjWRSQI@?@@?@@CEDCB@@???>>>?AC@A?>?>@CDDDDDEEECBDGGDADACDCDCEBBEC@?@>?>>><>??@BBGJCHJHHGGFBCDB>@BBBCCGFABGDBDA@BCA@DABDDAA?ABAEC@AA@??>>@?ADA><;<>>>==BC>A@@@AABBBD@AEDBBBDMXYPJKPUYWQ[VMNLDCAB?>ABHGFFECBAA@??>?@@@???DEBEIKF@A@>>@ADIKD?A@@?@@@ABGOYefa\\]_`afghilllllkkihgedcb^]]^^[YXV\XSPONNLJIIHFGHIIIHFEFFFFEGECCCCBA>==>@>>><<=?=<=>>>>>?>=>>=>;@<>?>>?>?@>?>;<:7778::;;=<HHEEHEAA?BA@FFEDB@@=<>>=====<=>@ADB=<<=;><::8=>A>>;<<<>@AB@@?>=<;9;<>??>=>>=?B?=;=A?==A=@A@?>A????A@=>??==A@?A@EGMKFBBFCC>98889<?><>COc{¤¶l\`UOSOJEBCBB@?DECCA???>>===?AA>>==>>AEFEEDDDDDCDFHIHFDCCCCCBDCCCB==@?@>>>=@>?BBAIKDDDEDDBCECC?@?EDBBAGDBCFECD@>EE@ADCBBAA@@BBAAB@@AAA@?>??>?>>=<<>>?>????@AA?@ABAABCBDC>BJS[YTIJNMPXXX]TLQOMEA@=>?AGEDEECDEB@????@@@>>@EDCGKJHGDB@?@@EJIC@AA@AAB@CDM\gbWZaccefffghilmmmlkkjihfedb_^^_][ZXV\WTRPONKKJJIHIIKKIGEGGFEDDFDDDDDBB?==>@>>=:=>>?=>>>==>=>===>=<><=>?@?>>>>@>=<:8778;;==<<HJKIJIFEGJJGD@ACBC??==<<==>?>=<>>?A<<<=>==::8<;<A?;>=;;>A????@>>=:9<>>@?>=>?@A?><<@@?==>AA@A>@>?@@@>>>>?>==>@?BEFIGE?@FEC@<899:?D@>ACITsrfPKFHKIGFGEHGBBBDDA???=<===?A@=<<<==AGGFDDDCDCDEEFGGECCCCBDEECCBA??=@B>?A<?A>BAAOOIJHEDCBCED@?CCBB@BCFFCEGECDBABDCBB@@A@B@@BA@@A@@BA@@A?==>>=>>==??A???BC?@A@BB@@ABCBBE?LZWIWTDKOLNTUX\ZPGKODC@>=?ABDAADCGEC@AAB@???>>CBCEIIIHLJBAAACGIFDBAAA@@@AFM\d^QTbd__cegihhilnnmlklkihgfec____][[YW\WUSPONKKJJJJHLLGHFFEFFDCDEEEFCBCA?>>??=><8=@@@>?>==>>>?>>=?<><==?>=?=>>@>>=998867;;=>=>?BKU]`]YUOF@@@AABB@>;:<<>>>==<<><<=>><==>=<;<=:=?>=@?;=B@??>>?><=;:=?>@BA>>>??>@?=>>>=>@CDBB?BCBDA?=<>>?@?<==>EFGFFD@@DECAB@8;:@E@@ACHRk}lNGFEDFGHGFJJAA@ED>??>?>>>>@BD@<;<<=BIGEDDDBCCDEDEFFDCCCCBDDDCBBB>@?CB?@A>=?>A?@GIIMIEEFFECA>?BHD@?DGJHGIICCD@ADA@@?=@BAA@@A?B?B?ABB?@A?==>==?@>>@@?@@@AB@@ABACB?CCCBEGOXUIKMKCHJKO\YW[_OAHMF@@><?@>A@?@CEDBCBA@??@BABEEBFKIJJME@AACDIEBBBA@AA?AFNZe\NO]gb^]cbfgggikklmllmljigffc```_][\ZX\XVSPPOLLKKKIGKJGGHIFFFDDEEDDDDCBA@?=@>?=;:>@A??>=>>??????>>=><=>@?=?<>=>?:=:99978:;=>==>>RirpleTGA?B?@@@B@?=;<<<>=@>==@<<==>>?@>==;<=<<:<>?@=>@?B><<==<=<:<>@CBB>=>@>>A?=>>>=<?DD@@@CCCBCB@=>@>AA@??@CFFFFE??CDBBE@=;;@BDBCEFNYhvhKFFECDIKDEHE>@?CB>>?????>>@CDA<<<>ADFFEEEDBCCDDCDEEDCCCCCDDDCBBB@A?BA@@B@>>@@<@DAFIFECFDFEA>?@@ACBCGHIIKFCEFECA@@?@@?>@@@??AAACBBCCBB????@>?ABA>>BB@@??A@@A@ADAAB?DFRUVKHMJHFCCCJLRSPOPHCFLE@@?>@????@@FDBFJDBB>=AAAEGCDIJHJLJB@@@@EHBA@BA@@AACMZbYLLWac^]]`^beffkijkkkmmlkiiggdaaa_]\][Y\YVSQQOMLKLKIGJHHGHHEEEDDEGEDDDCCBA@>?@@<;;>@?@?>?===???@@???===???>>=>>>==<998:699;=>?>?BYosvjXF?>=>ACB@DCBB??>9<@><>>?==<>>?@A@??>;==;:=>?A@>?<?=;:<=;@?;=>?@@@=?>@=>>=<=?><;=ABAAAAADBCEC@B@?>@@DB=ABDFFDCDCBBCBA=<=ACDBDEFGKMc~zYHFDCCDII@A@?>?=@@>=?>>>?>>ACCA??@?CDEFDDEDCDEEDCCDEDCCDCCDDCCBBCBB?A@@@A?>>>?>>FBCEGEACBGHB@@?@EFEEEEGIKKGECBABA@??=?A@AB@ACBBAABB@AD@>?@==@@EC@>AEC@@@@??ABBCB??@ESTMGFGKLHECBBDDJOIDEGLKLIB@??@A@AA??BDBIJAAA?>?>BGFDEGGHMNFA@??AED?CAA?AB@BJY`]PKP[ba^]]^\]`cdgjijjjkijiihgfdd_^`^]^\Z\YVSQRPNMLLLHGIGHGHGEEDDDEFEDDDCBBA?>@@==<<>>=??@>?<>====?@@?>>>??>=?>>=<?<;8777779:<==>ADShdi_K@>>?ACDD@@DFCABA<<;<=====<=?@@?@?>A?<;;><;=@A@@><??===;>DB<>@???==>==;;;;<?A<<<:>BB@AA?BDDBCCBD=@@@CCB@@DFFECA??BCBBCDDDDBBEDDDEEYskTIDCCFILI?>?>>>>>=@>??>?>?>@BCBAACCCEDDECDDCEFFECCDFECCEDDDCCCCBCDB?A@AAA?>>??>?DBCEDCDDEFHCCEEDDEFFDCCCGKIHCBCB@@A@?A@?BBAA@@@AAAABBB????<<?EFD@=DJFAA@@@@@BBA@>?ISLGBCFJKJJFCA@ABIMMLMTXQJMD@@?@@@BBA@A@@EEBAAAAA?AHEEBDEILKD?@??@ECA@A@@C@EETc]RJNV_b`]ZYYZY^^_cfffihhgighfeedba___^^][\\VSRSQOMLMLHGHHIGGGEEDEDEFEDDEDCBA@?@@==>==>>???=>==<==<>??>>>>?@>???><=<::7667699=??>?CGS`_[RMB;>??ACD@?@AAAA@@<=<=>=>=>?@?@A>@@??=<<=>>?ACBDB>=A@A?=?FA<=?@A@<<<<;;;;=>@A>?@;??=???=?C??@@B@>??@ACB@ACADA@A??BCCCCCBBBACEEEFDGTlbQHBDJTSMD>>@?=>=>??@>=??@B??BBCBDDCCCDDEGGEEDFFFCDDDDBDCBDDBCCDCDFB?@ABA@????@?ACBDFDEEEFFGECFEEHIIGEDDCEHGJHEBAAAA@@?B@@AAC?CAAB@AAA@???A?>@@CD>>@FD@?A@@ABB@>>DPQGA@BEEHHJKECDAAAIOX[TVZTKLHBC??CACB@A@>?AFGACABA@BDECBCEGJHB@A?>ADB@@@@BBCEJ]aVKKQXaa_ZSSVVX\^`cedehfedfefeedbb`a``_]\\[YUTRRQROMNLHGHHIGFFEEEEDFFEDDEDCCBAA@@=>>=>=>>>?>>=<<><;?=??>=>=@>>??==<<:8788::::>>@><HMWXLJGHB;=<;>?CC?>>>@A@?=;;<???>?C@A@???=;;=>><;=<>DFEA@A@AFDFBEA@<<?>>>:<=::<;<===;>@<?>=<=@>A@>@??@>?BB<?C>=>=<ACD@CFEFFFHEACCAEILPJBBFLKID@EFHKHA>>>?>???>?>==@CDD<@DADCBCCDDCCCFGFEEGGIFBCCCCDCCCCCDCCCDBA@@CCB@???@@?CCCDFEGGGGFFDCFEFHIIJGFECDECBEIHD@BA@A@B@@AAAABBBA@AAA@?@A@>>?@CC??ADB@@AA?AB><@IRNDA@ADEGJKJIFCDBACJOU^ZWZUMKKGB?@EFEC@?@@@@DHEAAAAAAEDDCCIGGGED@=>CEB?@@ABDDGT^[MLPT]b^^VOSUWY[\^adeedeedecddcda`ba`a`^\ZXVUTQQPPNNOMIJLKJGFFEEEEDFFEDEFEDDCBB@A>>>>?=>>>>>==<<<<<>@=<?=>>=>>?=<===:789;><9;<=@=>JTXUNKECA==;>>?ADE?>??A@@><<=ADCBDDCCB>A@=;===?<<<:=BBA@AB?BHHGFCDA=;?==>:=>=:;:<=<=<=??>???<@>?=>ABDA=@@A@??:8;=?@AB@BGLIDEGGFHEBEHJPLCBBDAB?AEFDHLJEA@>>>?>>>><?BEDB?>BBGGGFGDFEEDFGGEEDEEDDDBCCFCCDCCEBBBCA@?@BA@??@@BA@EDCEGGIHHHFFDDGFHIIIHDCDBDCBCBCKIBAA@@@A@AABAA@AAB@B?A@@AA@?=>ACCAABCC@@AAAAB=DQTJA?=?BFGIJJKIHIIGGLNNKVZSUSUNLHC?BFGDB@?>??@@FLGEDDA@BCCDBGFIOSK@>?CDB@@@ABBFP[[VLIRU^a^[RQSTVYXZ[_accbcccc`baabc_a`ba`_]ZWTTRQQNNNNNNJJKJJHFHHFGFEGFEEEFEDEDCB@A>>>??=>>>>>===<<<<>?=<>>>>???=:;=>;889:<=>=9:<==<O[ZUPLDB@=<<>>?ADEF??@>?@<<=ADFCADCBAB@??=??><=;;<;>??@@?==AFGFGECA><=<<;;<<=<;<==<><>@BBBCB@@@<=?EDFB=@@?<;9:8>DDABCBBHQMEFMLPOJEDEEGHDAAA@@@AFFGMMMKA?DEEDB@>==?AABA@BBDIORQLGHGFDEEDEFDEFEDDBDCCCDDDCBBDBC??=?BB@?>?@DCCGFDFHIKJIIFEDDGHJIIJFBACBDCCGGGKKIGEB@@?@@@A@@BAAA?A@B@@??>=<>@DDB@??AA@AADCELSRE?>?=ACEFGIJKJHHHJS^URMTU[YWYPIID?@BCCB@AA?@BCDGHIGF?@BBFCADEILNI>?@CD@@@?ABCHV\XQKKPV_`[XPNPRTUXYZ]^_``bca```^`aa^_ac`_]^ZWSTQOONMNMMKJJJKJGGIHGGFDHHEEFGFEFEEB@A>=>@?=>==>>====<<<>?==>>>>>>=<:9;<888:<====::<==;Vb\WRMC@?===>>@BCDC>?@>=<?<BFGDB@ABB@@@><>BCA=><=;;=>;=>>;>>CHEACC@==<;=;==<>>?=<=>CCCDCBECCBAA==@E@>>=A?<<88=;BGHBCDEEKOLHN][QOMGECBCDB@@??@@@FFGNMPM@@@HKKHE?><>?@@CDCCDJOMLLIHGEEHHFFFEFEDDDDCEDBDEEEDEEED>?@?AA@A@>BEEFHHFFHIKJKKGEDEHJLJIHD@@BBDCELLLKMQNKHGGEDBA@A@@?A@@A??D@??=>=@AFHD>>ACDGFBBFUTLCBB>=>?@EGGHIJIFFBKccRURTV\]ZRIDME>@@DJLNONLID@CDFJHE=A@AB@GFGKJLH<?@AB>A?@BBFP[[TMKQRV`]WVPMNPQTUWX\\[]__b`]]_^^aa^_`a_[\\[WUVONMMLMNLKKKJKHGFFIGFFGHHEEGGEEEECA@B?=?A?=>==>>==>==<=>?==>=>>>=<:;<<<<<<<<>=>=::==<<HPMRTOB>?>>>>>@BBB@=@@><<><ADDED?>AA???=>?>?@>?=?><><<=@?=><=C@ABA?=>=<=<>>;;=>=>=?EHD?@BDBDEA?><?B?=;=@=?<=9?BGIHDCDFGIJRYVbePDFFCDEDECB>>@@@BFFELPSH@?@EJKJIBA=?@ACDEDBDGHHGGEEEDFGFFFFEEGBBCEGFDEFEEEDDGHE?BA?>DCCA=@CFHHIJGEFGIJIIEEGIMNKJGB>>?@BDFPPQKOXVROCA?@@@@AAA??@@AA@BAA@>?;@@DFC?<>AEIHENWNFACC@A>A>ACEHHIJFILJQ\^baURY_[ULC@NI>??LWOMJPSTKAABBDFDABB@@BLLIIIMF>>@CC?@@ABCEVZVQJORQY`\WVMMMPRTRRXW[[][___][]^______^]]]\[YURPONMLMMKKKKIIHGHGHGGHFFFFFHEDFFEB@BC@>?@>=?==>>>>>>???====>=>>>===;:<;999;<====:;=?>;DJJNNPEEFA?@??ABA?=<@@=;<>=@BBC@?>A@??<??>=>@@?>>?=>=>??@?==>>A@A??>=====?=;==>??=@BB>=AAC>?D@?===?><;=??@>;9<DHFDDFFFGLRWa]^^OBA@@DGGGDA@???@BFEDIPMBACDDFHJGDABAABEBFEEBBCEFECDEDGCEFDEFJEDDCEGFDDFFEDBBDFE@EC@A@CB??@FHHENWMEDEGHGGEFLMIFFEB@?@@BDEHUUVKQ`bXQEA?@@@@ABB@@@@AA@AAA??>>?GDC?=<=?CEISULC@AABA>>AABEEFFIIFIUVVWeo\\_]WOHBDLK@>@OOEDCFJVQC@BA@DKF@@@@CGGGKIMF==?CB?@?BABMZWPQOQRQY`\VSMJMOPRQTUWW[ZZ[^_\\\]^]]_`_^_]\[YXTSQPMMLMKKJLJHHHHFGHHGEDFEEGFDFHEEDBCB@=??>??>>>==>?>@=>====>=>>====<;<;:::;<=>==;<<>=;AEHGEKFMSGE@=<@B?<;<A@;;<>>?@@A???B@?>=>?>=?@B@>@BA@?@A>>@<<>?@A>@?><;=?A@=<>>==@DH@?@?BCB=B?<;;<==<=>?A@BB<7<@DB@@EDDEIQQ]\TLD?>=?CEEED@>?@@AABJEHPIB@?@DFGHJHIFDCDGDFGGDEFEFFEFEFGGIFBEGGGDDEDEEDFFFGECDEFD@@@BA?>>>=ADDGCKSHDFFGGHGGIKNICD?>?DDABDKVaf[LThn_SGB?@@@@BCCAA@@AA@AAA?>>>>EDCA=<==DPWOFDC@?@@????@BIIGIIGIJNNYS[vc]XLHGFDDDJLB=APN@@@@CQVE=>A@?FD@@>?BCCHLKLG==?AA?@@AABRYRNUYTOQ\^]TNJJLMNQRSRTWXXYYY]\]\[][__`a_]Z[ZXUQROPLKJKLMKMIHGGGGIIGFDDEDEEDDFFEGFDCA?>@=>?>>>>=>>>??>>?>=?==>==<<==<<::::<==>=><=<==;ABCC?GIMPGA=?<<@==<>B@<;=>??>????@C?>>>>?>>@ABA?AA@@@CFA@@><;;><>B?=>>AA?A?>??=?CFG?<>>?CA@=:9<=<<@@BA@A?>?<;=>@@@BDBDEEHLccQDAA@>?ABAA>=>@@@@?DCBGQH@@A@CEGKMMJFGFFGHEIHFIMHHIGHHHHGIIDEEDBDEEDBCECEHJFB?BDBA@@@?>===>ABCFDFDGFHIIIIIKIIJE?>=>@BC@FPergSKUlysdUIC@@A@ABDDB@@@ABAAAA@>>>>CBAD@=>?M[K@CCCA??@@>>@@CIGFJKILLLNOKPa]|RECEAAGQMB?CPM@?@@CNTA>=@@>=?DB=@EDDJKJKG=<?@@@@@@BIWXMLX\TOT\_]SMMIKLNQRRSTUVVVWYZ[][ZY[Z_`_]\[YXVSPQQOKIHKLINKIGGIFIJIFEEDCFGDEFEEFDDDDAA?>=>@>=<=>?>>?>?>>><?==>==<<>>=;:;;;<=>?=>==;<<<FAAB>?BDD??A><>?><=?=><<<<<>@A@@@AD?>>>>?>>ACBCACA@@ABE@??>>=>>?=@>==??>>BBA?A=@DC?==<==>>>:8;A><=<??B@@>;9;???ABCDCCEEDFMhnXICDE>@??BBA>?@???BHIIKNJBA@ABEJIGJLKHGGIGHJGEFGLAEFGHCCDFIHGGCABFDEBDCDEKJF?ADEBDA?A?>=>???BCDFFDGJKLKLLHECDB?>=<>?@AEQhxqZRYjxghkMDA@ABCEFC@@@ABAAAA?=>>>A@@HC?@AORI@BCB@?ABCA@DDEIFEHIMMLMMPKOWXbTICCDBBIRKB?DPLAAA@FQH>>@?=?==CA>BFFEFEDEA<:;>>>@?ABKYVGKTXORY]^^VNLJHJLNQTTVWWVVVYZY[YYZXY]^]^]YXTSRQPOLJIILMKKLIHIIHHIGGFDEEFGDEEEGFFDCEAAA<>??>>?>>??==>?>>>=>=>?>><==>>::<<<<>>?=>>=;;<<AACA?@?>?>=@@A?=>><<?@<=?==@AB@@BCB>=>@>?>?CDDDCDA@@ABD@?>=>=?>><=?;<>>>?BBBBA@CDC?;;<>===;:<??@><:=>?>@D@9=@?@DFDCCEEEHJO_bTNKJGAB>=BBB@??@?AACFHLIEEC@@@CEHHIKKGGGKLNJFFDDFFBEDDCFBFHIJJEEFEFEDDCFIHHE@C@DDGB>@A=<=>>@DEBEDDHKKNJIEAA??>?>=><=ADP`c^UT`ouxda lSHACBBECAAAABCBABA?=>>>??CKGAACQIG@BCB@?BCDBACFDIIHJKNNLLONILMKIICCDBDFLRFAABOOD@@@IQGEB?==@<=>A@@DEDEBAA@;;<<=?@@@EQZRCHOQPRY^][VNIHIILNPRUWXYVYVWVW[ZZXWZ[\\ZXUURSPQNLLJJIKLJLMJJHJIIHHIFFGEEFEFFDEGECBC@@?>@@>>==>>?>?==>====????@?=<<=>9:<<<<>?@=??=;;;<@AB?>>=<??<>CE>:<?=BEA<;?>@BA@@BDC@<;=?>>@A@FIFEFA@AABC@>=>?=@>>;<=<<?>=>?AAA>?DC><:<@?>>@??CD@?>=;AEA?BCC=AACCDCBCCDEGRWWXSJIGGC@B@?BBA@B@A@@@?@@DBAA@@>@??CDIJGGHJLJLGFFEEECDEEDDEDDEHIEGGHFFEDDDDEDDCCACBDGAA?A??=>ACHKHDDFEGJIFC?@B??<??=@=>EMUYPHGObohYRqzjXKDCCECCAABCBDJGA>=>>>>?GOJCCELGE@ACB@@CDEDCEEEIIHJKLNMLLJGHIHFFBCEFEHRMCAC@MQF@@?ISPLFA?=><=?CABEJIIFA@@;==<>??@@FUXLCFOMMSWZZXTOJHFHKNPRTVWWWWVUUUWZXWXY\[\\WTUQQNNLMJJKJJJJJKLKJIHHHIHHHFGFEEGEEFFGDAAB@>@B?>?=?>><>=>=?==>>??>??>==;=>;:<<<=??A=@>><9;=@@==@;;=@>>>@C?;>@?HGA>;??A@@BEGFB>=<==??==@IJEEF?@DCBC@>=A?=A>>:<<==@>=>?@@@?@C@>=;:?B@CBBA?>?AA>>BFB@@>?>>?BDCBDFDBCFNVVWQGBDEBCCBBEBBBEDBAAA<@>?>AD@???=>CGFGGGHJJIIDEEFDHDDFDBCEFFGHHFEEFGFDCBBAACEDEBCACH?A@BA@>BFHLMHEDEFHGFEB=@ADB<=>==<>FOMHGGKQU[UI]tkpYRHIKKRUF@BFHKJC>==?>@@FOSNEEHGEC@ACB@ADFGFEGEFIIHJKMNMLLIFFGHJIGGGIHPQEAAC?KTF>@?GPNHEC@==<>>CCCFOOLGBB@<==>?@@AAKYUHCIRNQTWWVSQOHFFHJLPRUUUUUUSSSSUXVVW[\[\ZRSSPOMLLJKKKLJJKKKKJIJIHHHIHIHGGEEFEBEFGEBA??@@A?>??>>>=>>?==<===?>?>===:<>>=;=<:>??@@<?=>:<<A>;?<?=>BA?>@A>;?B@ADA?<>CEA=@DDA>>@A>>>><<?DEBBBA@GHCBBA@?=>B>>:==>=A><>?@?@@AB?=<::?ADG@AAA??CEA?CEFFA><>=>ACDAEHECBDGLMSOEAHLHDBADEBADHDCEHED@=?=AACCAA??BFHFEFHJJHFBDCDDFBEECABBCEEFKIEDDEFFBB?>BEGHGFGGGG@@A=B??CHFIJECCFGFFHHEACHGC<>=:<>=@EFGDEINHHGShmg\VVYEGFQ\Zm]C?BGHHE?=>>@?AMTRICEDEDCBAACB@BEGHHGGFGJJIKLMNMMLHEEEHJIHGHJOPI?CAC@ITB=?>DPNFEDB@>>>?BBAFOPKMECB>;=A@??ABL[TEDMRQRXWUUSNKIFGFIIMOUUUUSRSSTSSUTTTW[ZZ[TSSNPKJJLKKKKKKMLIKJIHHIIHIIGHFFGEHCEEHGDA=<=@@?=>A??>>>?==>=<=>;;>>?><;;;>===;;::>?>=><?>>;<@<;>><>AA@A@@?=;>@>>?@?>>BA==?@@@BB?DAA<>==??@?>@BABECBBC@=;>@=:<@??>B?<>>?>?ABA?=<:;?ADFAAAA@ABBA@@BDDA><>@@AAACHIFECDIKLMKECGGFEDEHGECCEDCDECADCC=>>@@DEFCABEDBCFIGEECDEDEEDEECABCEEAAMRIDGGFCAB@A@DFIKIHHHDBAA@A?@CGGJHCCBCDDEGHGDC@??<>=<<>>@BEKGHFHEBDEMJB??>A?=@KW\iRE??BDCD??@?>ESVPFDFACBBDCABBBACFIJJIGGHJJIKLMNNMLHDEDHJIIHIILMG?BBA@FTC>>?BRPFFGFDB@?@DDDILNPLJHHF==A???ACW]NDGMQTTUVUTQMIGGGFIHMKSSSTSQSRQQQQRSTVYZXURQQNNLJKKKKKKLMLIIKIIHHHIGGHHGEFFGFDDHFHE@<;?B?=>=>?@@>?>=>>><=;=>==@>><:;==<==>=<<<====>=?;>A<;>>=?A>>ACA<?<<@=?@AAAAA@>>>?CFGD@A@@>=??A?>>==???@>>@B?>==;==>A@@==@=<??>?CCA><<:;?ACEBBABABBBA??ABA@>AA?@A@@BEEIGEGILILHHDGFBDFILJGC@AACDCBCDCC?@@<>@DFEACGDABFFGGDCEECECBEECEADCFBBFIBCFEC?AC?=>@EIJGEFFD>A@@B?BEFEKFBCEDFGIKGHCA>=>=<=@@>>@C?DHEDFCABBA==>?BC?>>@ES_TTB>CHCC?A@AIXUQOKHDBCCDDDABABABDEFHHGGIKKJLMMNNNLGCCCHKIKIJIJJE@BCB@DOA>>>?QSGFJJJKFB@BGFIMNMHHIMG<???>?BEW\HCKKQTTRSSROLJIHFEHIIKQQRQRQQPPOOMOSTWYYXWSPPNMJKHIKLJMLOLKKJJHFHIGFGGFFFFEFFFFFFFD?<=:=>;?>?>??>>=<>?><==<;=>?==;:<<;<=<===:;>===?=<:>@<;>?=>?>?@A@=><9?CDCCBCCCA@ACCFJFA@A=@>=AAD>??><=>??=?@A?==>=<?B>AA=>@>=<<<>@A?<<<:<?ABDCBACBBCBA>?AA@@>AB@@??@DEEIIHIGHGJLHFEFDHIILIFDB@?CEECBACA?AA=<?@@BDEIE@CEGIIFEFEEDCCFEEBBBBDCBEFCDIDCACA>=?AEIIEDFEB=>=ABAGGGFHFA@CDEGLIFGEC>??>>?BA@@>?>@AADD@ABB<<==?@HHCA@BFOVXJ@FRCBBBEMTa_ZQNFDEEECCDCA@@@BBBCFFHGIJLMLLMNOOLGCBBHKILJFFGGD@ADCACK@>???OSJILNPLNGB@FCJSTNEDFIG??B@>?CHZVCFIHOSQQTRPMKJIHEDFHFHOOQPPOPPOOMLPSVVXWYWQQPNMJIKHLLKMMOLLJIJIIGHGFEGGDDDEFGGFEEEC?<9;==;@;?>>=>>>==>>=><;=>??=;9=;<;=<<<==::<==<==<;:A=;>@???@@BBB?<><@DCACA@AB?@@DDDD@>??=>>=?@@<>=<?==?>>>=?>=?@?<>?=BA>>@A=;=:;?=><;:=BCCBCDCBDCCCBA=>@@A@?ACAA@@BECBGGHGEHGHLJHGGHLIGHIHED@?ABBBCCCB@AC@>?==?AFCBEFFHKLJHGFDB@@CDBACBCDGDMKFIGEDBBAA@@BEHIFCEED?>>>ACIHIGGDC@ACBEFGKLMD?@?@?@@>?@?>>@@DFB@A@><>===?N]VPEAADGMNHLQLNPJONOo\QNHDGFE@?CC@ABABCB@FIHGHIIMLLLNNNLE@@AHLJNKCDEDBAAECBBG?>@@@MSMLNPPMNHDCA?JQPNGDDDC@@@@>?EKZMBGIJRRRPSQPMLJJHDDEFGILOPNMNOMMMNNOQUWWVWUPOPNLJIIIKKLLLNLNKJHIGGIGEFGGDEEEGGFFEEEBB@<<;<<==A@?=??=><=<>>=<==>@><<;;>;<=;=<=<:;<;><;;:;C;:>?==??@BCB?=?>?D@=>???@?>>A@@@@>=<<=<;=@=<><>>?>>>?>=<?@A@>?@@?@@?BDA==<9<==<<99>A@CBEGCAEDADCA=>@AB@?ADBBAAEGA?EEHGFHHHJLKIHJKFEFEGDA?@@@CDBAABAAA>=?=<=>BCDGGGJNILIFFECA@BDABCCEEFHRMJHHDEADAAAACGIIGEFGD@@?@BDFHHHHBC@ACAAHLJTXNEC?@?>==?>>>AAACB@?B>A=>===>NilWC??BCCKTVTOTZMHAHeaPSQGEEE??@@A@BBBBAAEHGFDFFILNMPNLIEC@AHIGOPFDCBABAFDCAC>>AA@KSPOPRPNOIFFD@IOONIFDCC@AB?>@GQSEAHMKQTOOROQNLJHGDDDDDFJNMKJKLMLNNPPPUTUUTQPPNMKKJIHLLIIMLMNKJHHGFGEGGHGFEFGGGFEGFDAB@>>;:;=<@??>>?>?<><?>=>>==>=><:;=9;;=<>;=;8<<<;:;:;B<:???=<<>@>>?>=?CA>?>????B?>=>>==<<;;@@=?B@>?>>><@=?<==;>ADA@CB@?@@>>???===;===;;<A@@DABCA@AA>BDBBB@AD@@AFDCBBHH?<CDHHGIIIKKKPPKIEEFCE@BAABBCDBBCBB???=>>==>BDCEFIJJJKJEEECB@DECCEEDDCEJKHEDCDBDEKEEEIIHIHLLHFDA?@CDCEFDA@?@C@>JRJMNIGFA??==>>>>=AABCAAAAAA??><>ALTVK@>AA?>HTV[\WND@>BHSKFMVHDD@@@@@@BBAB@@CDDECBEFHKLKNNOMJIECEICLQMJGFHHIKKD@?=?BAAISSRRRQOPKHJHBHNNNKHFDDBBC@@ALSKAAIONQPPNPMNMJJGEDDCCDGGJJJIKMLLMMPORSTSSSPNLLKLMLKIIJHIJJJKKIIHFGIFHHIHFGGEFGFEEDCAA@@==9;=?>@<?>@??=====>>>=>==<;<;98;<<<=<;<7<;==:9:<D><@A><==>?==><>BFECA>?><>BBA?>=?>?===CB=@A@?@?>A@?>>>>;?>@B?@AD@?A@??>>?>>><@=<9;?BDBCABBDFBA?@FDCDBDD@@EECDCCKJ=:ADHHHJJJKJKWYMGEEEBC?BAABFGCECEDDA?=>>===?CECEDFJBDDFEDGCE?AABDEEDCBCEGGCCBA?CENFDDDDBAEGIHHEDCDFIFFIGBBC@BB?EHHHJFBAA>===>>>??@DC@@B@@A?>>==AEKGBB>AA???HLGP[M@>>=?A?>@BGB@D??@@AAABA@@@BFGFDEEEFGGFIKKNKKIILIAEMPRROPOKIIGD@?@ABBHTWVUSQPQLJMICHMNOMJHFFDDDBBCNRHABIPPQPPPPNLJIGEDCDBDCEGHHHHIKJJKMNNOQSRQPKKKIKKKLHIIIIJIIJIHHHHFEHFIIGFGHFEGGFEFCACB@?><::<@>??>=>=?>==;??=>??>>==<;98;=<;<<:;8;>==<;::CA>@CDDDC@A@>DIBDEA??@@><;?AEBA@ACEA@AD@?>A??@@@@@@@>B?<;>@?>>>AA@@>?<<=>==>AA>;9==AC?C@ABCABB@@EGDDFGD@BFDABBGIJC;>DIIJKKKJIK^bNEDEEAB?BABBEECDCDFGDB>?>=>>BDDCA@AD@BBDCBDCEA@?CGECCCCCCFEAAAA?AEQNDDBACECABACCCEEEPPOOKFDCBHHHFCGEEBA?@@=?>>===@DD@??@AB@>==<=???@@@BC??=?COIQRC>=<>??>?BAADDB@@@A@A@BB@@@CDEEEGFGIHFDFMQSMLHGKKCAJKLKGIKHFHHFB?ACFDCMVXYWRRRNLQKEGLMOOLJHGFFEDDEPQFADJNNONOOOPNLIHDCBBAACDFGHGHGHJIKLLNONPPONJIIHKIJLKIIJHHHHIHFFGGFFFHJGGEEGEFFFFGCBADB@?><::;>>=>>==>?==>>==<==>?>=<=:9:;==;<<;87<=>;=:;8CA@ABBEGGEHDCECBDECFCD@B@;=BDCCDDFFBABB>?>@>?@?@@AA>=@><;@@>;;>A@????<<=<<<?B@<<;??>>>@CECA>AFA@ACIFHGECAAAAACHJJHDCEIGKIIGHHLekPDDED@@?BBABDDCDDEEGEC?@?>>@CHFA>=@B@ABCBBCDEB>@DDDDCABBBCC@>@@?AGPKACCFDFA??AACFFFDPPQQHDCABEDCFDEDCDDA?A@?<=@=AEEB?>?@??><><=>>?@@ABBA>@?AAMWYFC?><<>@@ABBCCCB?@@?AAB@B@@?CBDDGJHGJKHFHMWYRSMEHADBDGDFHHIEGJIGDBDEFGGIIKQQNSTQPVRGGKMPQNLJIHHFFEHRQDAEJMMMLNNOONLIHDCBB@BADDGGGHHIIIJKKKMMNNLJGHHHJHIKKJJIHGHKGFFFFFEFGHIGHGFGGFEHEFCBADAA?>=<<;9<?>?><=>?===<<<==>??>=;::;:<>;<<;98;=<;<;98EAAA??>@AAECCCACFDGIGCCGC<=AAB@?ADDA?A>??@@=>?AA>AA??>?=;>??<<BA????><?==<>@>=;=?CD@>>>FHD=?CGDCBCEFEGIFDDBBCEIIHHJIIJJKKGHIGJUfVHEED@??BAABCBCDDCDGFEAA@?>?BEB?=<?AAACCA@@?CE?@AABBAAAABCC@@??@BDCA?BEEB@A>??ABDECCEIMPGDCCCEEEFBDEBEEDAAC@>>@=CFB=>>@?=<;==>@>>>ADDA><=?AEEIXR@E=>>==?@AACABCA@?@?>?AABAAAACEEGKLIHJGLMPUTTUPIFBCA@DCHGGGFJIFGGFDBCEFCBCEGKLLLLSWNJHLRRPNLKKJHGFJTPBAFHKKKJNNOONLIHEDCB@BADDEFGHHGKIJIJKLLMMJGHHHKJHJHIJJJIEIHGFEFFCDFGHGGHGGGHFEEFGDDAB?@>>==><:<?>>===<?==<=<=<><>?>;<?=<<<<<<<<98:==<<;;:EEFB?BABGC?@BC@ADBEGEC@FD=>C?@>??@?>>@@?>>?=?>C>=>>?A><;;>???>@CDB==<=A@??@BA>;=@GHCBAAFF@>ADGFDBFEFEEHGEBAABBFGGHHJLJIJLKGHGIKNKFEEE@@?BAACBACDBACGGFBBA??>AB?=<<?ABCCA?>?@AB??BA?BAAB@ACBC@?@DGC@AAACDC@??@>?AC?BBACMNBDEECCDECBDDCEDEABDA@<?AAB?==:=>=;:<?>>?>AEGB=><>>?C@IZKC>;=?=>??@ADCC@>>?ACA?BFDDDDGGGIHGFLPNIRLQSLNPQKEDBAACBEHLKLNJIGFEFBB@>?AA@BGJJIFLTWMGMTSSPMNNLLJHMWP@BDGJJIHMNOONLJHEEBBABBDDEEGGGGJJKHJILKLLJGHJJJJHIJIJHHIHFHGDEFEFDGFGFIHFHGFECEFEFCBBA?@>A@>>:?@>?<<>>====<=>;;<=>=;<=<;>=<=<;;99:8<=<<;:FHGCBCDFOI?>@BB@BECDEDABG?>?AA?BCC>?>@@@???=@?>>;<?>>==<=@A@?ADEFB<:9>BA>AD?<<;<?DGCBABEC??EGFFDCDAFGBCGCDDDBBCECDEFHJIGIJGHHHIJEEECA@AAAABB@@BBA@CGIHDBA??=@?=<==?BDEC@>=>@A@?>ABBCCCC?A?DBA?@DKHDCAABA@B@>?>>ACCAAACKHCCECAADB?BDCDCCEDDFE?>AA@@@=;=<=;<=<>>>>?DFB?>?>=>??@IUI@>>=>??==?@B@DB>?@BDECBFJKKHGHFJKJGMQPINQJLLJNQIEFCBDDCDCHMJOKIGDCGC?>?>AB@=>DGEDFIQVWRVUSPMNOMOMIITTDAEFIIGFMNOONLJHFDBBBBBDEEEGGGHIJJHIHJJJJKHJKKJJIHGFFHHGGGFFEDFGHEGGFGHGGFEEEEEFFEDCCAAAA@@?@<=?=><=??>=>=<===;===<;>><>>?>?=:<:8899:<=<;IGEDDD?ENNA>AAA?AEDACDDBH?=AC@DDGBBB<???A@@?@@?=:;>><:??>?A@>BDEC@;9;<@??CD>;<<>D=>?BBBBA@>CGFFEEGCED@ABAEFEDFCEEDECDHKKJHFILIEEDC@>AA?BA@CAA@BA@@CGHHGDA@@=@=====?BEEB@>==@A???AABBBB@?>@AB@AA@EFBC@A@@=@@>>?@ABECAACHFA?AA@@CEDDECBBADEFHE@@BA@BA>@<?>;==?<?>>@BA@>>@?>@@>AKNJD?>@@@??>=>?@AAA@@BEFIGILLIHKKGJKIGINOJLWKLLJNMEBCCFEDDDDFFHNLHCCDEC@AC@DA?=>>AABCBDGPWTRPOMOQPSQLJXSCBDGJJHFKOPONMKHECBBCBCDEEEGGGHIJJHHGIIIIJHJJJIHHEFEFHGFGGGEDDEGHGFEGGIGHFDEEEFFFEDCBABA?@A@??;;>>=>=>?@=>=<<<=<<<:<?==>>@?=<;<:88:<:;;<<ECFEDDDHNODA@??@A@CECEDCF@>BDBDFGCCDA>@ACADAA@?@=<;<;;>A>>?>CDAC@=:9<>?@ADC?<==CF@>?DDB??>AFHHFAA@@BC@>ABGFEIFBGEGGFGKKIHECDFJEDD@ABBCBBB@A@?ABCCHGDHHFFD@??@><>=>@CGDA>>=<@?@A@BABBAA?>>@ACAAAAGEBD@@>?===>>@@BDDCA@FJD>=??@?=?C@DBABBBEFFFDA?@DDB@@<;>>==>=@?>A@????@@?@@>CLJGHABAAA>?>=>=@??>?@BDGKHJHIJIIHFIKJKNNNJJXZMAINNGA@BEEDCDB@AEJIGFDFC?ACFDEA=>>>?CCCCCEJPTQKMMOOQUWRKWXDACHNLHFKOQQNMKHDBCCDCDDEEEGGGHIJIHGGHHHIJHJJJIHGDEEEGFEDFEEECDFFHFGGGHFHGEFDEEFFEDDCBA??@@?@A>;??<>?=>>?>==<<;<=<;<?>=>>>==>;=979:79;;;;ABGGFIJJHFB@>ACCA=@CCEFEEB=?A@BGEFDECBB@CCDC@?@B>;<:;=?A@@>>EHEE>;:;==?ABBA=;<>EGHCFEE@=?ADIGFCBCDCAA@=?ACFGIDBADFGGMIHEFB@>?DECB@ACEFCAECD@CACCFGFHJIHGGD?>@?=@?=>ACCA=>=<@ABBAB@BAA@?>>@ADCCAAFCACA@A><=>?=>>BEDDCAFLHBAA@@A>>?>BAABBCEDBFGFIKKHCAA@>AE??CG=B>?>??=>@??AB@FJIC@?A@?A>?=><??><>?=?CHKKMLKIGEHIONJJMONJIPQNEMQSMDBBEEFFB>?@CFJIHLJB<?DFED@>?>=@CDCBBGJGNVQMLLMQRTPOYYDBCGKKHGKMPPMJHGDCDBCCCDEEEGGGHIJIHFFGGHHIHJJIIHGDEEEFEDCEDDDDDFFFGGFGGGIGGECFFEGFFEB@@@@A@?@@@<:??>>=?>>=>=<;<<<<<=>>>>>==>><<:89::;:9:;BACGKMJHHC???CEAC==@BBADGE??@==EDBCDGGHEHGED??A??<==>?AACCABEGGB>>>>?>??AA?<:<>CIMHEFG@>?AABBAACFDB@><>@>>BDDBABACEGKEAAC?=;;=?CA@BDEFEDIMIBDBCAAELJGHHDDC@AA??@@@@@@BB=@=?=>ECBC@BA@?>=>@BEEEAAEBABA@A>=>?=;?>ADDHECFHEFFCA@A@BA?@A@DEEFDCEEETXXRGDFECBFCCKL@?>>@?><=??@AB@KIEDA@A?>@?>?>@=?=>=>>AAGJGMOMIGHHMQOMLMJJGEGGKIHOQWRCBEEFDC??@BAFKIHG?<>AGDC??><?ADBABBGJGFR[ULIKOOONP]TDCCEEHHHJLNNNKHFCBCDCCDCDEEFFGGJKIHFFFGHHIHJIIHGFDDDDEDCCEDDCCDEEFFFEGIEGHFEDEEGDGEDCB@??@@??A?::=??<=>??===:=<===<=>>>===>>=<;:89;8;<9;;B@AEFGB?CB@CFEA@E?=?B@>CED@A?<<CEA@CDGKIEHIE>=B@?B?@??BBDCABCDC@=@DD@@?=<><;9<@@DFDDGFA>@>?AA@A@B??@><AC=>@@CDAABACGIIFCC@<98=@DAABEGHLOORQJFB@A>EIFEHD=AAADB@@ABEC@@A@BB>?<>AABCDA=@?>=?ACFGEAADB@B@AA>>?A><?>ACCFEEIIEDFDABA@A@@ABBBBFEFFEEGZ\^[E@??>=DFCFHCCEDCHE>>>??@A?JEAJI@@?>?>=>>>=><====?BFGGLONJJKJMQQNMNOMMKIJKJFKUZP@?ABDEEAAAA@BMQED?=@DGHD@?>>@DEA@@FGGDADR]\SOOONSZVLFHDCAGGIJMNOKJHECBBDEFHFDDEHGHGIJGGFFFGHHIIJIHHGFDDDDDCBCDDCBBDEEFEFEFHEGGEDDEEEEDDCDA@?=@?A@A@;<>?@>====><;:;<==<==;>=>=>>><=<;88<;;;8:;B@BCEB><>?BFF?A@A??BA>=@DCCA@;<ADBBDGEECAGHE??@>BBB@>>>?EE?@@@AA@EGDAB@=<<;;:@@AB>DGDB@@A=?BDEADB>BB>?@ABA??BCCA=<BFBJB>@C?9;?EHKJFJLLTVPQX[XLBBACBEIHF=@@>A@AABCHLIEB@AEFC>??@FCDA<BB??>CGHIEABCA@AABA>?AB@=?>ABBDCDHGEDEDCDCCBAACCBABDFIFCMb]ZTR@====<@CCCB?ADGHJG@>??@BA@KDAMMA?@@>==>>=<>=>=>@AACDLLKGGIKIJQQONSWSPRURPNGKVRF>>>?BBBACEBA>FOGHB>AFC@@@A@@CEFAACDDFB?>EP[^[WVWYYMEHLHDCCGJLMNLIIFCDA@CEFHIHFGHGHGFEFEFGEHFFIIIIHHGFDDCCCBACDCCABDDEEEFDFGEGGEDDEEEDCCCCA@?@@AAAA?<;=?@@>>>==<9:=>==<;<9;=?=>=>>==;78=<<;8:;CCDBDEA>=?@CCAB@>>@EEB??CCBBA?<>BBEDC@>?BDB@>>=?A>@C<<;BD@?CABDCC@CCA@=<;<<=?BA??=DFACAAABA@CDCD?BDC?A?BA?>?BA@?=:@C>@ABHE=:=>DOX]OSLKMOLVkpf[MCB@@FGIH@A@?@@@>DGHFECAAABEDBBDDCBDCBDJ??>BGFEF@@BD@ACCA?@BDB>?>@AABACHFEDECDDDCBAABBB@BEGGDA@BDGEB?>>??>ABD?><<>??@DGA?A@B?BLA?HF?>>>??>=?@@?>??@@ACADGJFFFIIKKROQNRTQOSVVVOEFPTNE???@A@CBDCA??DIIB?AAB>>>?@@CEDABEDDC@A@ABIP\ZZVTNGCHLHFGEHMLNLLIHDBB?A@?CEFHIIJIHEEECDDEEGGGIIJIHIEFFCACCBACDCB@BDDEEDEDFFEFGEDDEEEDCCCBA@??@?>@A??;<@@???=<=<:;=><=<;><=<?>>===;;:78==<;99:CEEFAD@<AC@@AB@>=>@BC@=??@BBF@==@DEACCBAB@>;;=>??=>A==@ED>ACDFICAAAA@A?;=><=ACBBB@BCDECBDFC>>@?>>ADB??>??>>>><?@BA?=>BGMOE=;<ASfjrdkdVNMRks^RJEA?BEFFGBABA@B>@CCE?@>>=>AFDCEGGDBFIGEJF?=@EABF?A@B@@@@??ADFD@???@@@?BGFEDDCEEECBABABA@ADCCA=>@@A?>A@??>ABA?=??==<>;CLIHIFFEMO>>CF>@C@@@@?<@A?ABAAAABADGKIJIHKKIYZRMPRPMOTUVPEEPUNG@??A@AFECB>@?@FG@DBGQMGGDAAA@ABBDFDABCADADELKLJFDB@DIGDEIKMMNMLIFCA?A=@ABDFEGLJJHGFDEDDDDFHGFIHJHFGEDCBCCBBBCAB@CDDEDCECFEEFFEDDEFEDCCCBA@@?@?>@@??;<=>>?>=;=<:=?>==<;=;;>=>>=>;<;:9:<=<88:;GLLLID?<EGDBCEB?==>@AA@?>=<@C????AAB?DECBAA<:=><;=<>@BGEB@@DCJKBAD@ABB?<=@BCBAACEDBGJHCEC@@?ACC@@BA?=?AAA@?><>@CHID>?BFNSI>;:AUhegimn]VYfvaOIFC?@CEFEDCADB>???@>=B@?@A@EGDDCDHHIJECEE>>@CCAD@>>@@=>?@?@DFEC@@@@@>>BGFEDDDFFECCBBABA@ACBB@=?A@A@?AA?@ABC@BED@A?<<<<BFJPOIGLJ@BB@ABDAA@A@>?EACDCDBBABCEFGJIHKMGU\QMORSOLMOQMGIONHEBA@@CEIGGDC?=BDDGKJMPROSQKB@=??@@ACCBAABCDDDCBDD@??@DDEHILNMMLJJFEB?>A@CBEEEFHKMJIJGFCDEDEFGEFGHEFDEDCDBCCCBBDBADFEEBCECFEFFFEDCEFEDBCBBBA@?@?>@???;<=>>>>=;<>:=@<:=<<<;==>=>>==<;999==;::<<LTSURHC@EEFFEIFC>??@BDFC=;9:@?AA@CB>>?BADF@<:<<:;=?BFEFE@@CECIHBBH?DD?<=CCIG?=ADECAHMMKGC??CHFGBBA??==ACCCB@A@@FKLJACGFKPF=;<<CNMQ]^ZRX_nrRMIFA@CCFFEBBCA?A=<=<BB@BAAABFDBDGHJKGB??C@@AA@@?>>?>?=>?BA=>>AB@@?@@==BGDEDDFGGECCB@@BAA@BBB@>@BAA@?A@?@ABDBEDA>@?>?=>BBJNNKJLGCEC@BCDDBAC?A=EBABCBBDBAACHJIGJKKLPTOMORRPMMKKHELOKIGEDDEFFFBCCE@@CDEKOMMPRSTSOIFCA>?>@GEAABBCGFBDADEA?@A@CGGJMNMLLKIGDB?@BBCACDGHJKNLLLIEEFEDEEEGFFFEDCCCBCBB@DBCECAEEDEDDEDGFFFFEDCEGEDBCBBBAA?@??@???;<=>>>>=;==9<>;9:<<;:<====?==<;:98;>:9=<<P[^_XMGDFFDDDGECBBCCAFHF?=;8<?@??DC=<>CCEC><9=;;<>?BGEBB?>BECBA?BB?BC=>A@FKG==FHA>ADIIFEC?@EGGCAB@@?<>=?BCBCB@CIJHHEDFDFGF<;;=>@DLX[TLS[gwYSRLHCDBFGGCBBBAA=;=>CB@ADECBCDDEEFJIC>=?BB@@AA>?>>@?@=?>BA=>=>A?>??=>?BFBCEEHJGDCDC?@BAA@A@A??ACABA@A@?@ABCCDCA>?@?@BBCENQQHGHFCDEDBBDCA@=??AAAB@ADCC@ACCDMKIKLLIINLJKOONNLKKHEMMNJGGGHFBDDABDDBBCDFJOTRMKPVNVRTSMFCDDDD@@BDDDEDBBFG=@?A@EIJGPMMMJJHHDBA@ABBABEGJJKMMMOIKDEECCCBEGFEDDCCBCBBBAEBBEBCCDDDEDCFGDEFEEDDFEEDBCBBCBA?@??@???;<=>>>>=<==9<=;9:<<;:;<<===><<;;897<;:===Ucki]QKHGFCCDFEDCCCB@EFDB@><;<?>>@?=;=DFA@<;;<9;=>@ABB?=<<?CDA@ABBBA??BEBAGD=@MIA>@BCADFA@CFEDBACC@>@<>==@B@ADCFFFGECCCCAB@<:;>@@DKKIHMVc~vaVZNEEFBCFHCDCBA@=<>>CECBGID?@BDEFIJEA?>@FDABB@?A>>>?>=@BA@@>B@A>??????DECCBCGJGDCFB?ACEB@A>A?@BDBBAAA@?@ACCDCBA???>@BBBDHMOIJHCDDDBAACB@@?@A@CBBABE@B@DDBCNOLLJKFEHGECGLKMNLKIEPSPNLLOOQQQNJJKKHFFFELNNLJFKTW[STMNMKNNMIA??BDEFECDIKEA@@AGFIOQLLKJGIFECBAAABABCDHHJLJLNNKFDECABBCFFECCBABBCEEBBBADBBCBCCFCBEEDFECDDEEFFDCCCBCBB?@@@@???;<=>>>>=<=<9;;:9:<<;:;;<<<=>;<;:988;:9;><VmxueVPLHDBBCEEEDDCB@DECB@><<<===>>::>EID?<=;<9<???A?>=;<=AFFA@BCB?>>CGF?AD?<DGFB?ADAFKC>BBEECFBEE@@A@A>>AB>ADEFDFFEEDCB@AB>88;<<CCEGELPaluohb]ZMFDCAACHECDDA?===>@EGGIGD@@?DGHFBC@??>?DCDCCBBA@???>ABB?ABBAB??@???>HGD@?>>ABCDEC?BEC>C@BCCBDECCBBA@?@ACCCBAA?@>>@BBADHMNJIFBBCCA@?BB@>>>AEECBCCFBEFGEGGJNMJJIHHKLHEDIMMMOMGDKNQRPV`_\VUVTPNMLIGEDDDCAHIEOXSFRKKLQUVPH?>=@CCDDFIOOLJEADGEIMQNLKIHGECBAA@@@ACEFIJJKKLOOMGEFB@A@AEEDCCACCBCCDCBBACBACCCCECDEDDEDEDDEFGFDDCCABBB>A@B@A@?<<>>>>>=<=<9:::9:<<;;;;;<<=>;<;:988::9;==VmzyjVPLHDAACDEFEECA@CDBCA><==<;===;<>DJE=<<<<;>A??@<>:=?@@EB???AA>?CFFBAED?>IIICCEDBLIB@@@EGGBACBCDFEB@?BB??@FJGEGGGHDA@CC>978:?FACCDIJMWiibbcbOBAA???DCBADC@>?=?=AHGEDA?@@ACDAADA?>=?CCEFDBAAA@????B@>@ABBA@?@?>=AHFB@@CB??AAA>BDA?>AEEFDAEDCDBBB@@ABCCBA@A@>=>@BBADHNMKIDAABB@@?A@@>A@ADDCDCCFGMPKIIIHGKIHHFGJNLKFFJMOPMGEHLRRPUa\WTSWUTRPMHA?>=:;<AIGOTMETUSYWQUJC>>>@BCDEHNQOPPIEHFDDINOKKIHFFBB@@A>?BDEGJKIIKLMMJGFFD@@@@BECCABBBCDDDCBAABAABADCDBABDDEDDDCEFGFEDCABBBA@A@A@A@?;;>@?>>>==<988999<<;;;::<<=>:<;:998::9;<<K^knh\RJGBCIIECCDDDA@BCCDA><>=:<====>?EEC<;;<<=@DB??@><?CA@@;;<?CECDDDDCB@@@CHGECIKDCJE?@CAFHH??@@EFGJGB??A>@AGHFHIHJHCACEB@>=<=AEBBDDEEHPlwsljpTCD?>>?BDBBAC@<>===>EFDA>????@@BEDC@A>ABABCBBFDBA?>@?@?>AB@A@??@>=?ADCBBBCBA?@@?ACC?>?A@CCDBCECFCAA@A?AA@@A?AA=<>@BB@DJMMMIC@@AA@@@A@AABAADDEECDGKRTNJKHHFHJIJJFIJKJEFJMNNJCFKLLLOPWVUTRUSYUQOJD@@?B?>CHHHOLGRSPONNJDA=?CDBDGJLLKNMJIGGGEEKNKKIKHEDA@>@?@@ACEFHIJHHJLLIHFFF@A?@BCBCBA@ADDDC@@@ABAAACCDDABCBCEEEEEDDFFEDCBBDCBABA?@AA><;<@?>??==>;97999<<;;;98<<=>:<;9:989;9;;;EXekhhXJCEHMHDCBACC@?EC@CC?=?>9>===>@@DBA;;;<<>?BA@@?>?@>?=>::?AECEFECEB?>>BFECEGKIECJH?AGEFGC>>A??@?@B@?BA>@DDB@DJJJICCEF?ABBDCCDCCDCEEGTmw{n\JCA@??@BDFBBCA??=;><AA@ABB@?>>DFDBAA@?A?@@@?DDCCA@???@??ACDCC@?A??>BCDFGGE@@@@@@ED@?@?>?ACCDDCEECAAABAB@>@B@BC?>=@BB@DMLLNIA??@@?@@@@CDCBADEFFDEGKPONLKIGHIKJLMKGFHGEDHMNMKCFKLJJOPRSTSQQQPQMPRNIKHFCFJIJGEKOSTNNOJFD@?DJBEEFKLLIEFFFFIIFILLKJIGGGC@?>=?@ABBBFEFHHGKJKJGFEEAAA@BCDDBCABCDCA@AA@BABCBCDECBDCBCCCCDDFFEEEDDCDDCAAA?@A?=;;:>>?@?=>=<;9:98:=:<;97<<=>9<;9:989;9:::TdllptRDIFILIGGE?CCACFB=?A>=?@==@==@BAA@?:;:<=>?A@AA@?AA??=><:?ABDDDDFFAB>?CFEFIIGEECCCAEGHIHD==A?B@?>?=?CDAAC@>?A@ACFGIGEACCDFFEDEBBDEFGL\fnlWHACCB@??ACHCCFEAA><===>>=@@?>==CEDB@???ABA?@AAEBA?@?@??>ABCCEFEBBAABCCBEFIFA@>A@DDBA@A@>@AACEFDBDDBBBC@@BAA@>>BB@>?AABELLLPI@>????@A@AEEDCBEEHGEFGKOMLKJIGHJMLJNNGFGEDAAJNOPECHMIJORPQQMNOOOPOOOLLKJLLKLILLGNTUSKGIHGEDCGDDBCCEIJDDEGGHGDHLMKJIGHGGEAA@>?ABA@BBBDEEEIKJIGGFEC@@BBCEHDCCCACA??AB@ABBBBCCCBBCBBCBCDDDFFFGDBECCEDAABA@@@=9<:>>??B?@<>=::98:;;<;87::=?9<;9;988;999:clpquoQFKHKLLIICACBCBDC=>?<=??@?===?BCA?>:;:<>>???BBAADBA@>><;?@ACCBA?A???<ADFIJIHFFC@ACFHHFD>>AA@BB@>?<@FEA@@>>??>=AENLFFFHIHGHGDGEDDEJPOMNRPHFCEDCCA@@@CFEJB@@>=>=>?>>?>>=>>?A@A@?>?DD@?BACAA??>??A@?CCBBEFECB@@FID?CEF@@@<AC@?@A@????ABBDEDCEFEDCABBACB@??FC@??AADGKMLMF@AA?>?AB@BGFEDBEFIHGGGKMLJJJIHHJKJHKLFEEEBC?EKKLA?CGGHNPOMOMLNNMNLJLJKKLLMLJKJKINUOLIEEFEGGEGDCDECCFBBCGGHHDHKOLJHGFFGGEBBAAABBBB@?@ABCFFHIFFGFEB@BBBCFEDAAC@A@??@AA@CBCBCBCCACDBCBCDEDFEFEEBCDBDCCBAA?@?<;=<>>=@>??>><<:;:9;<;9879:==;>:9;:98<999:_iqndWLOMJMKKIGB@BAAADEA?@@>;;??=:==ABA@>=;<;?<?>>DCBDGCB@>>==??ABCAAAB@AA@?CFJHFDFGGFFDCEB?>?@DDCDC@>><CECCDB@>@?>??CHD@BDGFFEFJKIFGHIIGHHEHGFFEGFDDCCB@?EEH@<<<===?B@?<<>?>>?AA>@AABCA?ABBB@???@>@BA@ABB@CDEDB@AHIC??A@?=>?DDEB?AA>?>??ACCCBCFFDCDABDAB?@>>B@@@?>@GKMOOKC@CCABCCCBCFEFFCFHKIHHGKLJIIIJIHJIHFHJEEDDBC@EFGDB>ACDFKMLMJJKLNNLLKJKKLKJKKJJIGHKNIGDFFFEHEBCDEGFFIHGGDIJIFDJMNLIHHIGGEDBABCACBBBCDAAACFGIEFEDDDCA@AACEEBBCBA?>?>@AAA@C@BBBCBCDCCCCCDCDDDEDFEDDBDBBCAAA@=9:=====>>>>====;;999::9878:====:9::89<;89:\bdXMIHJKKKHHDB@?@?ABFD???>;<;=><;<>@CC@@?;;9=:=@F@@BCJDDA??>>?>@ABABCDBDDBBBDGFDDDHGDA@?@?@BCDCGGEICCDCDCDBD@@>@===@BB@@BCEFCBEJMSNMLMIIIIFFEGECEEEGFBA?@BBC<;;<===?>CA<<A@A=>BA@ADBBBA=@E>AA?????@BAB@@A?CCFCABACED@?><=?@BCBDEC@A?=>=ADFCCEBDECCCBBBB?=>>@@BA??@EIOSo^LEBDDBBB?@@ADDDHEFIKJJIGKKHHHIJJHHGFEFHEDDDBDBFFFDC@BDDDEFFD?BCDCFHEEGHHJJIKHGFIHHHHFGGECEEFCBDFGHHJLLLLJJKFDDHKNJIIIIFEDDAACBABBBACCBC@CFGGFFDDBDAECAACDDBAA@@@?><@AA?@BAABAA@CDBCCBCDCCDDDCDEEDDBBDAB@B?>::>=<=====?>=><<;<9787:677;<>>=;:::9:;:999WUTH?@BGKIGGEBBDB@@A@AA=?=::<<=>;;<>@CDAA>:87:<>ABBABBGGCCD@B@?>@@BBCEECFFDCBCEDBBDFFC@@@ABDGFEFGHHHDDDEGHCBEB@>A>=>EDCAABABDBAFPTPPPMJIFHHFCEFCDFDEHFB>?@A@>;<=<==?A=@?=>B@@>ABCBBA@AA?>AC?>>@A??@??CA@@A@BADBBABFDB@@?>=?DDBABB@?>?>>?DHEBCBACDECCAABB@=<>A@AB?@@EGW[yaICCDEDBBBCBAA@FEEHIKIHJHGIHDGIKKHFEDCCFDDDCCDCFGEDDBDEEEEEEC?A><:;BCCEEGHHJIFEDEGHGFHLNLNFHJJKLMJHGHIJKKIEECCEJKMLJKJIDCCCBABAABBCAAAABBCCECDCEDAACB@?BCCBBBBB@@@==?@@?@@@AAA??BCDAEBEEEDDDECCDCCCBCDBCBA@=7<??<;<>>=??=>=<<<:7879766:<==<=<;;<;78:88GHLKE@DHHGEGFFHGB@@A?>@>@<8<;>>?;;???ABA?=979<=<?DDBBACFCCDBA?@@EEEDDGGEIIDCBABB@ADEEB?@ABCDGGFFEEEDCDBCGKGGC@?B@?>@DBA@BBBCFB?DPaiaYPGGECHDEGBBDDCBDGC?@A@>=>?==<=?@@<?@>A@A>@??A@????>?CC??>BB@@?CCB@ABB@A@ABA@CIBAAA@@@EFECCEB?>=>=>CGHEDABADFDBAABCBB?>@A@@A??>CHQSZVHDFCDDEDEFDBA@BEGGHHHJHHEJGHLHGHJGECBADDDCCCEEGGEDEDEGFFEEDC@A>=;<BCDDEGGGHHEDDEFFGHKLPMKIMOOQNLHDEFGFGGECBFHJKLKKIKJECBCC@C@A@ABBAAAAABCBBBBEDCACCCA@CCCAAAAAA?>??>?@A?@>?@A@?ACDADACEFGDDECCCCBABCDDBCAA<9<@=:7<=>???>===<:<9968976:=;>==<<:;;89:78LS_`QCBFFHIJHHEDBACBABCA?<:9<A?B?>>=>??@A><::<;:>ACAA@AE=BCAA>?EIBBCDGGGFIIEB@@@?BCDDA>@BCEEGHGGFCCCCCBCEHDDBEAAA??BB?>@AA@AAA@DKV^`_UHGFDGGGFABEDB@CJIB>??@AC@>==>??=>?=?@?BA=>>?AA???@@ABA??AA?>ACBA>@BA@@A@AA@EIBDCB@BCEACGGECA?>@ACFCEFDBEDDCEBAAAACB??BA?@@??@ACILVSEFE@CDEDCHCCBADDCDDEIIGEFHIMJHDFEECDECCBCCCDFGHGEDFFGHGFEDCB@A>>=>CDEFEGGHIIFDEEEEIKJJLKLLMMLLIICCEFDECEFFEGILLKKIHGFCADCBA@B@AAAA@A@CBBCDCBCDDDBBBA@@BBBBBC@@@???>>@AA@>@@???B@ABCABCEFFDEDECDDCBBCDBBBA@>:;<<;9:==@???>==>=<;:78:779:<><=<<:<=;8:88UhtjYG@DEIKIHGBDGGEB@AB@><:;?AAHFCA=<?>@B@=:;:99<?AA???@B@@>C??DDA@@@BDFFJKFA??>?BCCCA=@CEGFGIHGEABBCCCDCGCCBDA?A?=B@???@?@A>A@DHTZY[WOJGDHFFD@BEE@CJKJD??CFFD>><==??=>?>>=>@@A=>??>??@@?ABA?@AA>=?@AA@A@@B?AAABBFGEFEBCEDA?BFEB@??ABAA@@@CCBCCEEECAB@AB@?>?@=>@AAAEIHJONEGC@BABBCFEHBAADCCDEGGFEEGKJHCEDBEDBA@CDBBBCEGHFFEGHIJHFEDBBAA?@?@DEGGFHHIJKHDEEEEHJJJKKJKIJHHGEBAEGIGHGIHGGJKKJIGGFCAABCCCBA@?@BA?A@AAABDCBDDEEDDABAADC@B?A??@=@>>>?BB@>??>?ABCB@@CADCEFEDEFCCDCDCDCCCB@@>:;;;:99:??@>?>:>=<<<:77:778:;=;<=;;<9:::99MdvmdUKIGHGEDFFJHIFB?@>>>;9;B@AGHEFA:>>@>=><<;9;<>DD?>@B@A?>@@BDCBC?=<?DCHHDDA@ABBA@?BA?ELIGGJIHC?@ACCCCBFCCBC@???>A@?>=><@C?A@BDQZZ^ZSLEDFEEECECAAFMJFE=?FFFBA>==>??>>>>>>=>BB<=@@B>A>?>ADACCCC@@?@CBBCA@@BB@@CGIDFEEDECBA@ACED?@AEC?>@??@ABBCEEEBBABAAA@?A>AABAADJKKLNLBDCABBBADEEF@ACBDEEEEECCHJIGGEECDDCA@@DCBBADHIIGFEEILJGEEDBBBAAAABEFHHGHHJLLJEEEEEGIIIJJJKIGEFBBCEGJJGHKJJIIIIIIGFGFCBBBCBBBDA@@BB@?AAAAABAADEDEDCCBCBDA?@@@>?????=??AA?>?>>@@ABBA@BBCCDEEFCFDCDCDBDDFDBA@@>>=;;;9<>@?>?><>=?<<:999978:;>;<<;:8<999<;Mftldb`RJIECBFHLHIGB@A???<8:DD@FJCA=:=>@:<;>==;;==DFB@@ABB>=AEHDDCEAA@>?@EDCDDDAABBA>BHEDKNJIGIE@>?ACCDBAECBBB@?>@?A@?>>>=@B??@DAIYZ^ZPHDDDEEEFECCBDIIC>=?BDDBA?><>=>=>==ACA?BB>>@BFGA@?=BAD?CECAA@AACEECA?@@?@BFKFGFFECAA>?ABEEA@DC@=@@@@ABBCCDEDAB@@BAAB?@@BAA@CISUWXRICB>@CCBAEFB@ABDDFGGGEABIMKIHFFGGDDA?BABAA@CEJKKJIIHGJKFCCCCBBAACCDFGJIHIIKMNJFEEFEGHHIJJJKIGEFCCDFGIGDJJJJJIHHHFEEFDBCBABAAAABA@AA@@ABBAAA@BCDDDBDDAACCA???@=?>=@?@@??>=>>=?@?ABA@@BCCBBCCCDDCBBADDCCDFCBA@A@?=<;;=>>@?><=>=@;<<<97879;<<;=<:99;:<:;9GT`]X\ZPIIGFCFEHHKICFEBB@<7;EE@EHA=<;<>?>9:><>><>@EIFAAAB@<=DJHGGBEAEB=@>A?EEFD@ACFG?AEDBFMJGDIC@>?<BCFD@ECBCB@?=@@@@??@?>AB@@@CAGSTTTRLDEDEEEFFEECCGID><=@@A@A;=>>??==?BED?DJGBADGJGB>>?BA@EDAABDA@AFJHCBB@@A@AEJFFEGFE@A?CCEFA@CGB>>=??>ABCBCEDAA@?ABCBA?A>>?@@CRyZNEB@@BCCBBCFD@CBFFJIJGABFGHGGFEFGFEC@?AA@A@ADEKKMKLMNNIHDBBBBBCDDEEDDFIIIJJMOPKGEEFEFGHHIIJKIGFFDDEGHHFDIHHIJHFGEEDEEC@BBACCAAA@B@@@@A@BC@AB@BCBBC?BBAABB@???@>?>=>@@????>@@=?@?@@@ABBBBBBDCBCDAAACCDCDEDCA>A@@>>;;;;=????=>>><<;>;<676:==<==<::9::<;76BILNLHIHIGEFCBEDGILADBCB>:9=CGCA@><<<>?>=9===>???>DGHC@A>=<=CIHJFAEEEBACA>ADBFB?AFIEBA>@@CJIDDFC?@@>@@DBAFHECAA?<AA@AAAA??ABA@ACBFMNNNMICDCCDECCCDDEHF?;>ABA@?@?>>>A??@EGD@@GLIHGIHIGB>>@CAADBAADDA@AFKMECBAA@@BEIGFFGECD@=GHHDCDCFB>>>?=>@@CDDCB@@@@AAACBABB?=?=BPy©yVL@BBBABCB@@ACCEDEGHHHBDGHGGFEGFHGECBA@BA@AACEGMLMKMNNLHGFDCDGFDEHIEDCBFBDEELOLHHFFGFFGHHIIJKIGFGFFFHHGFDHGGHHFEFDDCCDC?BBBBBA@??AA@AA?@B@@AA@BCBBC@?CA?A@?@>>@@?><=@@@?@>>?><>@?AAA@BABCBBCCCDCCABBCCCBCCD?>A@??>=:;<=>>>?>?>==<;;<97769;=?<><98;;9;;86?BEHGBB?DGDDCBCECDEA@AA?=<9<AFD?=>>AA???>:9<;;<=>>AEGB?@>>;?DDGFABEGGECEECFDEEA@BFGD@?<@=CJJCDEBBBBA@?A?BEDB>@?<>?>?>DCC@@BBA@ACBEGHIIIFBCCCBDCCABCEGA==@ACB>>@??@?A>?FADB>DIJHIJIIIFA?@?BAAFCABDCCF=BFLHGGAAA@BIIFHFECABA?EJGFHBDBD?=>???>?BBACB>>?A@A@@AACA==>>?Cd´zVIBDCBAABBCBCEFEEEGHGEBDEDFGFEIHGEDCBA@@@?ABDEJJKLMMNLLKHIGGIIFDEGHFEEBBBCDEJLKGGHIIHHIIHIIKLIGGGGGGHFFEEGFFFFDDEDCCCCB?BBAAAB@@BBABBA@ABA@AA@@B@C@?B@@?@@>?>=?>=>>?A@????>=>>???>A@@BBCBCA@ABDCA@CBCDBCBCA>>????<=;;;=>>>=>>=?=;<=<:7668;;===<88<9;=<;9<@EIGB>=@EHHLHEBBBBBBBCA=<:;>DB>?@ABD?=?<;<:9:::<<?BE?=?A?;@CADC@CDFC@BEDDFDECA?@B??A?=><CGFCFGCDGFDBA@?BABCBB>==@?>=AACA??A@ABCCDBCEDDCABBBACDC@@BDD?==@@@A>>@AAB>>=?CDA@BIKIFFHFGGFBBA@A@?BEDCDAFEBEDDDCEFAA@AIHCHGDCA@?BHHFFFA@ABA>===?<=>??>>?=>AAAA???@?>@@FFFPhZOFBDCCCCDCACBEEDDGHHEEFCDGFEFHIGFDDCB@@@@?@BCFHIJNPPLKJJIIJLKIABCEFEBABCCDFJKJMKJFJFIKJIJLLKJIHHHIIIGEEEEFEEDDCCDCCCBCB?BBAA@A??AABCACAAAA@AA??AA?<??B>?>@>>?==>>??>?AA>=>?@==?=??>A@AADAAA@ABDDAACCDDBABCB@>>?@?<=<;<=?>?==>>?=<=><<876:;<<=;:89;<<;<;:9ADGFB??BHNUd^WLEBBCBCEDA:9;=B??@@DBA<<==><::;;;=>>BC?>@C>;AEAA@CCHGDDFCA@A@?BD@ACBBIE@==@B@ACEFDFFCBED?BBACAD>:@B??=?@EABCCA@ABCBBCA?@@ABAA@BDC>?BEB>>>@@@A>>?@?>>?==BAACGHGHDAADFIJBB@@A?=AGFEFFDDGNLIFE@FABAAHFEFGEEB@@EJGEEA@?BBA?>?<>==>@?<>=?@BBBA?=>?@@>@HFGJFMKC@BCCECDBECBDEEDFHGFFFDEGDFFHHEDFCBAA>AA@@AAGIKMOPNLJJHHGFIIFDBCEEEDCBCCDHIJLKKHJIHLLMKLKLIIIFIGGGEEDEEFEDCBBABCCCBBBA@BAA@@@??@ABB@B@@@@@@?>@A><<??=?=?@?@>>?=>??>@@@>=>?A@>>=>=>AA@ACBAAABBBACCBCDCBCB@BA?>>??<<<<;===?==>>==>=<<=;97:;=<:::9:<;<;;:::<?AEFA?BDQh|vhTGDBCFEEFA::<>@@>?CA?@<<;=>==:;=><?@AA??@@;;CDA>>CFFGGGC@>??>?BCAACFED@>?>>?@?CBFBEHHKLH@@CC@>><>?@<>>@@FFDEEBA?ABA@AA@ABCFFA?AED=@CC@=?>???A>>??>>>?=>ABBDGFFKGA>ADGFBA@>@?=BDEGIJIIKRQSMHDCBCDDHIFGIGGFECEIHDB@>?AB@A>?<<>=>??=>??B@AAA?===>=?BAACHJLNDEDCBBBDDFHBBCDFGDFDDEFECCFHGGEFDECBADCAAA@@CFLPQPMLKIHFECEGDEDEHFDCCCEEFJKLLKKJJJINMLKIKIIHHFGCDFEEDEDCCABA@@ABCBAABA@BA@??@>?@AAB@A@@@@@??>@@=<<>@?=>??A@=====>>?@@>?>>=??>>=<=>?>>AB@AABBA@ABCCDDCDCCCC@??>@><<;:<<?;>==>>=><<;<<:99:;<<;;88:=:<;;::9=>?ENNHJOd|zaNIFDGEGD?;;=?@@@@>=>=<<;;@@@==?><>A@AAAA>9>EC?@BADCGHH@?@BC@ADGDABDCA@?A@>@>AGCCDIMNKIH@>==>=<=>>>=?=@ADCCEDB@@@AA@@@@CCADFA>=@A@CDA><@?>>>A>>>>>>>?>?ACCFGFFIGA?>CBC@@@BA=BCADHKLNLNPQSLIFFBDJHFDHFGIGCEEGEED@??????@?=====?<A>?=?A?BCC?>>><>?>>@DGHPQQTPLIE@CDHHGCDDIIEEDEGEEBDHIGEEFHIEDFEBAABA@AEKQSPNMLIGEDDGGGFGHIGECDDFFHKMMNLKKKJJJLJIKFGFFFCGCECFGDBBBCA@@?@AACCAABAAB@????>?@@@A@A??@@???>@?=<;=>=<=>?@?>>=?<?=@@?>??>>@A?@==???>>?A?ABAA@BBCB@DDCCBCCB@@>=??=<::;>=;=><=>==><<=<=97:<;;;;:9:><:;9:;;=;>NbnmowgXVUGCC@?>==??@??><=>=>=;<?BDA>A@==BA@ACB=<BECA@@@ABCDA>@@CHDFGCABCCA?@BDDA=>DGBAFOOHFABA=A@BA@?@?>??>ACDEGGEB?A?@BDDB?>@AABA>=>?@BA@?>?@==>B?>>>>>>?>@BDEGHGFGGA?>CBB??BFD??DDDGLLNNNQSQQPKEBFLKEECDGHFA@EGFC@??>?>?>>>=;;<>?=>=<>??@C@D@?>=<?>>??HLNSQQZbY`aSHFLHKQJKNLFCGIIGC@FKHFEGILLHFGFDEECB@@GHPRPOMLKJGGHIIGFGIHIHHDFFHHLPMOMMKJJJJJIGHGFCCEEGEB?CEDCABA@??A@@ABBBB@AA@?????>???@A@@???????>??=<;<=<<=>>?>>=<<=?=?=?>?>>>>?@?><=@>?@>?@?A@CABBACCBDEBCAAA@@???>>;9:;<==;=<=>@;=<;><:968<<;;:98;><;8;8;7:;<Vq~¡¬¨m[\\LFDB>@=?BCA?@>=><=A?>?@BB@<>><>B@AAA?<:DCCBCC??@@?=>?AADCBA@>@BA<<>EHHB>AHG@BFLHIC<??CGD@BBA?@<?@ADFGGHGFDB>A?@DFFB@@AB@A@?>>@@@@EDB@>>=?=?<=>????BCEFFHHFGGA@?CBA>?BEEACDCCDEIIJKQPTUUSJDDGIEEEBDEFABAACA@>@?>@@>>@C?<==>??=>=@@AAAC??==?>>>@@PWSQMLR[V^naJIHKLKOOMKKHGGHHCDHHGHIILNMJHIHHGFDBAEFJNRROPOJKLJKJIIHHHHHJGFHHKMONLMMJIGJKIIHFGGFDCFEFDD=@BDB@?A@@???AAAABA@B@?>=?=>@?>?@A@@???????>?><;;<<;<=>>?>><<<<>=>=>>>>?@?@>@@>>??????>>?@BBBBABAADEDDAAB@?????=;:;<<;;<<=<<>=;<:><<968;;<;987;>=<98987?;?Rr«¬ ª´~qod\MFADBB@@BDCDDC=<;<A@<=??>>==>=AA@A@?=;?BABECCB>@???>=>?@A==>>@@@>A>FIJE?DKJGEDGHB@=BBDHB?AAAABCDBBEFHGGGED@>@A?ABEDBABFB@@?>>?@ABFGD@???>>?>>=>=??BGGHFIIGGGA@@CB@>?BDFDGDCCEFHIJJORVTSSJBBHGCDCBBCFEBABA@@===A>A@>?AA=<=>@?===?@@AAB@@=A??=@@AKWVPLLLJM\eSGHDISNOQMJMIFEJKEGHGJMNOOMKKJHHGHGFEFGGINRRNNKMKLKIIIIIGGGIIJHIJLMLIJKIEEJHHIGFFGAABCEEDDC@>>@A>??@@>@???AB@A@AA>=>>?=?>>??A@?==??????>=<;;;;;<==>?>=<<<<>=>=>>>=>?>?=>@>>@??>?@@????AABAAAADDDCCBB?@?>>@=;;==<;;====<<==:<>;<7779;;;;86<>>=;9988=<?Kk³®¡¡pnnj\IBACAA=@?ADEGE=<;>A===:;;=>>?AA@DE?>;>C??ABCCB@?>@?@>>>@@=?A?@AEEC@FFHDCGDIJFEEC?=AB>AAA>A>@@B@EDCBCEFEEDCA?ACC@@@EB@BGDABA@?AACB@DEB?BEDCED?=>???CJIIFJIHJGB@ADC@=?@CGGGDBCFGHIJJMPQONNHBEIEABABCDDBB@A@@?>?@==?>=?BA?>>>@?>>=?A@AC@?C@@@A@?@BGLWJDFFDDHIDCFHMXUOPLGIIIGGIIJIGOTQPPNKHIJJJKJHGHIILOSPNNNMLJKIHIIFGHGHGGHIJKKIGHGDCHHHFDCDB?=<=ABCBAAA><=:?@A?@>>B@?@B@AA>>=>>??=>=>@?>@?=?@>???===<;;;:;<=<>?>=;;<<>>>=>>>=>>>?=>?>=?>>?@?@>>?@ABBCA?@BDCDBCA?@?>@<:9<>==::<====>><;==<=8668:89<=6=>=<<=;89><?EZr¬¦¢ ~dYbj\FCDB@><@?ACCFF>;<<@=?>9;<>?ACCACDBA><BCDB@CCDDA?>>???>BDBAABA?BCFCABAECCDBCIHCB?=?A@?@A?@@?@?A?DDDEDCBBCBB@>CECA??ADDBDEBAA?@D@BD@BDCDDHGGJHA>BGDAAIIHHJIIJGA>??><=??BHJGDBDGHHIJJKOLJJJFCFGDABACCDCCB@@@B@AB?@>>=@@B@>?>??=<==>@BBCB@CA?@CC@@CFGd^GBDCCDDBFKMMLLMKGFGFGGJKHFKRWSQPNKJJIJLKKIJLKJKPPPOJLKIIGGFGCFDGGHHHHGHJHEEGEBDCCBEDCDAB>@>?@>==>?>>?<<@?>>?=>???@?@@><=?>>?>?>>@??==>??@>>=:==;:;<;;<=<>?><:;<<>>>==>==>>>>=>?>=>==>?>?>>>?AAABAABBCBBCBA?@?A@<8:<><<::<=<;<=<;;<=<=;:68879:=9<>=<=<:869;:@O`¡¦hSX`WIJJDA>=?@AA@DEC?<<>>>>;;?>>AEDABCBA>AEA@@@ABECB@>A@>A=>@BDCCB@@BDB@@@A@FC@CEFCBF@@@>?@A@@@AA@@@ADDFCBBACB?>>BDBCB@BCCBDFBAB?>C@A@?@DHIHJEDJLHGIHGCAEFEJHKKIGE???>>?@??DBDDBEIIHIJJIIGEEEDDGECABBDDCAAB@@ACBCFCAA@>?A?>??>A@@=???ACEDBA@@AA??AADLPã³`PFFIHFDJIIHJKLJFFGGHHIHHJQSRQTQNKKIJLLKKKKJIIJOOOMJJIJHGCDFCEDFEGGIHHHHGCDEEDAABEEFCEEA@AA@@><?>>>?@>>>??>?????@??@?>==?>>?>=>>>>===>???>>>:==<9=>;;>=<>@>::;<<>?>==>==>>>><>?>==<<=>=?>>>?A@@A@ABBCCBCD@?@>@=<:<<=::688:;:9768;<;<<;:677767<:;?>>>=;;4699>GTl~u¥¢xWSTTIHGDFD@>BDAABDEC=<@>;>=<=;;B@BA?@D=>DC@AA><>A@A=@@>??=;<?AA><?CDEB@@?>@DDDB@==ABC@???AA@>>@DDA@ABDDDBA?CA?>=ABAADDAAACFGCA?=>@?ABBABILHFCCHKMLJGFECCABDGILJKJB???BC@A@A?@BBHOLJJJJHDBAAABEGCBABCEFB@@CAABBABDB@AABBDB???@DCA@B?@BCEC@A?>??A??BDJQgkcKJLLGJLIIISQLIEEGIKJJIMPSUSTWOMLLKIJJIKJGHIIKNONNLKJLIGFCEDBDCEHIHGGGFBBACDC@BEEFEBCC@@BA@BA=?>>?>@><=???>>?==?>>>@?>>???>>==><==>>>>>?@>><<>><=><=>>=@?=<;<<;>?>>=>==>>>=<>?>=<;;<=<>>>>?A@@@@ABBBBBBC@@@?><9;=<<::6776777767;<;;<<;7668878:9<?<==><445;@FR_ip ¨£dU[LCGEGFA>BGCAABB@>=?@<<=;<;<>>@>?C?<AD@=AD@<<<=>@A@>><<:=<??><;?>@@>>CECCBC@>>@=>@?>?>@@?><=DHCBBABBB?A?@@>==BA@?BCCBBDEDA>><>@@?BAC@CDBEGLGIJGGJGDDCCEIKKMNJKGB=DFF??>@>=>DMOKJJJJIGB@>=AFGBAABDFEA?@DAACB@BBA@AABBCC@@@AED>A@>?@FC@@?>?A@>>@AENW\df]YIHKIIKGIJIQNJIFFHNMKLMPSSRWXUMKMLLJIJGEBBBFGKMLJKJGIJHGEFECADCFCDDDDCFD?CBCACDDDEDBA??A@A@@?@@???>?==?==>><<;;<===>>?@@@>?=>=>;==>>=>>??<<>=<=>=<;<>==?=<===;;=??>>><>?=>=<>?>=;::<<;>>>>?A@@@@ABBABBBC@@?>=;9:;<:;96777786889:;9:=>=86798778:;>====<568;?EO`w¦±´±ªlhWFIJIGC?CGDA???==>?@=;<<<=<?>?>=CB9@B>>@??===;=?@@<;;;<;==>?<;=<><=?CBB@>>>@EEA?>>???@A>>>=>?ADDAACB?>>=?==?A?>>?A@?CGDA><>@??A@?@AA?ABCFHILLHIIFFDCBGMMLNPNLHH?CFF@@@A=>>DLMKJJIIIIC>??ADEAABBEHEA>AEBBEB?@@@@ABCBBDAABADB?A@?>>BA??@=?ABAA@BENUWY[SGDFHJLKIJIJLLKIEHGKJKNOQRQSUWRMLLJJKIHEEEABACGJIKIFDDFFFGFFDDB?ABDDGECCCCDCEDBCBDAAA@@@AA@A@>>A@??>@>@==<<><::<==<:<?@@@?>???==<<<>>?>><=><=>;9>==<=?>>?<=>>>@<<?>?>><=?=>><>?==<::<<;>>>>?A@@@@ABBAAABCA@>=<;99:;9:96778968878::9=<?<:8997668;<=<=><<68<?AINa|§¼¼ºÀ´¬}TIJKKDD?DDBB>?>=>@???<=====???==C=<BA==??>==A=>?=<;;<<==>?>=<=?<>>?AA>?>?@?@DEDC@==AB?A?>??@@@DB?BD@>?=<>>CA?>>>>?@?AGFA=;=@ABEA>???@ABBCCEJJDDHGFFEGMLKGILKIKJA@EEBEFD=?@EIKLKJJGHJD>@ABDEBDEDDEEA?BFCCGB>>>?@ACCBCEBCCADA@A@?>?BB@???BAA?A@CGQRPURKGIIJMNJJKHLMKKIDIGIKNPRRPOTWUNKLJJHGFFDBCD@@ABDEGCAA@@BCDEEDDC?@BHFFBDBA?ACCCCCCBAA@AAAA@@A@@??@A@==?>=>=;=<:;??>=??>??>?>??<=>>=>>??=<<=>=>;:;<===>>=>=;=@>>@=<?>>?=<<<=>??>>===:;:;:<>>>@A@@@@ABA@AABCA@=<;;999;99978889788789::=>=<<::8776679<<==<=7:@DDJMc­À¿¾¾°¤nLGFEHDA?ECCC@=>>?@?@>===<=?A@><>@=<C?=?<=@=>>>?;;<<<<==<?A===>==?@@A>;=>=@?>>@CCA?CLKEDA@A@BDAA@@CE?@B?<<=CED=?>=?A@?CFC>=>?AGKGC@??@@BACCEICFCGJHGELIEFDFGGEDCACGIMMGGAADHLLLMKJFGHC>?BBDGGFHGCCC@?BEAEJC=>=?@BDDCDFCDDADBAA@?>@BCA??VcbQCA@EJPLHKJHHIMQOHFGJKONLJHGHHINRPQPNU\XPKIGFFEGDCDEDCCDAB?AA??@@@@AABCCBBABDFEDCBD@?>A>?@B@A@??@A@@?@@?@>>??>>??>>>?<=====>>>??=>==>>=;;<>==>>?<><=>?<98:<=<<=??><;;>?=><>:=>=>>=<<>>>>>====;;9<;=?>>@AAA@@BB@@AABCA?<;;;989;99:89999888889::<=<;::;9;776769<=>==8<DJGILd²ÄÃÂ½¬aJFDDFB?=DE@@A@>====>>?=<=<>@A?>@?;@D@@AA??=??C=<=>;=<==>>@?>=>BA@?@>:=>=<=??A?BDA@EHMPKDCB>@KGA@@CGAAHB?ACHJHEDA@?@>?@DE@=?>>EJEEFCBBCEDBDFHDEDFIHFAGBEJBDEDFHHFHHGJLJIFFEHIJJOKFIHGC?=@BEFDCEDEDA@@BGAGTA;>=>ABDDCFGDFEBDCBA@?>ACDB@@naGAAEKOJGKKJIJOMKIGEIPPOLIHGFKNPQOOSOVVPKHGHFCBEDCDCCDDCCBBA@@A>?@?@A?BCCBAAABABBA@?@=@=>>?A?@???>@??@?????>>=?>?<>???>==>>?>=?=<;;=>?>=<==<=??>===<==999<;=?==?==<<?>>@???<;=>>=><<>==>>?===<<;;=>@?>@@BA@@BA@ABCBCB?<;;;979;99:9::99999999:;<<<;:9:8:77787:>=?>=>DFFEFKf¦´ÈÇÆ¼¨vUHECCEA>?BDAAA><<<<=<>A@=<?>?@>=?@=BGCCC?>?;?BB?>>?;=<<>??@@???>>>==;<<=<>=@HFHEC@=ADGOQKDB@BGGEBADEGFHFEGGHJGFFFGHFHHDDF?>=?=?FEDCFFECDEGGHIHGFFFDA>BFLJBBBFGJJIGCACGIGGHHJLHMRHBFFFDB?BAADBBDDB@A@>BGCDQA;=>@ADCCDGHEFFCDGDAA??CDEC@L¦qKAAFMNHFKMLIKOMJIGEKONNKHHHGJPPRPPROPNIHEEECBDCCBABCDCCBB@A?A@=@?>>??AACB@?@@?@AAA@@>?@<?>@>@>?=?=?>?>>=>??>>=>>?>=>??=::>?><>>:9:>>==?=>>=><:;<<><<;:>===;=>>>=;;=>?????@>=;=;===<>=?;>===>==<;<=?@>A@AAA?A@BACBCCB?<9:;97:;99::;::9999:9::;;<;;:998977798:>=>>=ACBBCDG\£µÂÓÊ»¥iKGDBBC@=?ADBBB?===<==?A?=<@@>>;<C=:DHECA?>>=@CC><<>==<>@BA@?@>?@?<;<<=?==??BABDFCB?>CNROLJGDIKJGDCA@@EEGFEFIIDEACADHJJGLG>??==>CHDBFIHGFIHHKJJJFABB>?BHJKEABCIIFEA@CKHGGGLNJGEIJB@CCEGDECB@ABBBBAAC@=@AADF@=>@AACECHHHEDDDDHEBA?@DEFEAYÈ¤OABGOLFEKONJMOMJIGGLONNKIHGHNQPQPOOKHJFGGFDBDDCCCBBBCCBABA?@A???A=?@??>@@@?@@??>?AA@?>??>>@>>>>?>>>>?====?@?>=>?>=>>?><899;9:::<><=<<>=>=;<;::<==;;;<=?=>;<==>?<;=?>>@>=?@>=;==<<=<>=>>>==<=<==<=<>AAAAAA@@A@BAAB@BA=;9::89:::8;;<:;:999;9;:;;;;;:9889777:::>>>>=BEBCGGMZ··µÄÄ¦}`MCCDABB?<>@CCCB@>>>=>>@A?<=A@>=<>A?:DHEB@AA@?A@=<====>=<=?AA@B?@?=9<>=>>=?BA@@>@?@DE@@IILIOMNRPJD@@A?BFEHGDDGJCDDGDABCDDDC?>=<=>CGDEHJJHDFJHHHIHBABB@?@BGHCBBCEIECA@EPKFFIQVTLFDB?@CDIHEDBA@B?@ABADC@??@AEJF>?A@ACEEIOFDAFBBHC@@@ACBCFBX¥×ÐSACHQJDDKQPKMOMJIGINOONKIHHHMPPPOOMIIHEGHGFDDECCBBABAAABA@@@@@??>=><=<>?>?>?>?>???????>>???>>>>=>><=>=<>=>??>==>=>?==;:99999::::==:=;;?<=;::<<>><::;;<>>==<;==@==;=>>>?????><;<==?=><><<>==;;==<<<>AAAABA@@@BBAAA@A?::;:99;:;:9:;=;996::<:<;::::;:9888778;;;>>>>=BDBBGFGX«« ¯¬qNMH@AGEDC@=??CEDCC@??>??BB?<?B@>=>>?><EEFFBA?AB?<<@@?>>=?<<>AA@??><=;>=;>??CB@>>A==>ADFAB>IKRRRWNF@@BCABEGGEFHCCDBFCCCEEBC>>@>===>@EHIJJIGEDGGHGHHDCC@??@ADDBBABDHFEGGDQJLWSWYVSJBA@@BFIJGBBHFBC??CBFB>B@ACGH@=@AABEEDGLHEBFCADDA>AABAABBRÔÅGAAJRKCDKSRLMOMJIHKNOONKIIIIMOPOOMKHHGDEGHFEDCCBAABBB?ABA@BA?>>@@?>====@<?=@=>>??>?=?>?>>?>===>>==;;;==>=??>>:====>><988:;>;=<;889;;>=<>;<@>>;=<:9;===>=<:<;<<?<;:;<===???>?<9;>>>=>=?==>?>=9;=;;<=?A?@B@@CB@AA@@@A>;;;989:;;;89:<:877:;<9<<;:::;;9887779<<;>?>>>AEDAA>@Sqyu\MLHB@GHFC@@>>B@?=>@DA?@ADC?<AC@>>??>=?FFFDBB?A?=;?AA?>???>>>>@??>=<CCA=<=BCB?@>>A@==?>?@CADHKOEDEDBA@BBCGGFFFEEEFDFGB@CEB?<>?>>>;>?DIMLIFBABFJKHHHGBC>>??ADCBAABBDEGMV[^[\d`_fiaSGCCCGGFJJGFGGMNCBDAHC>A@@@FF==?ABDGCADFKKDFGADAB?BAB@?<@EZ}SCIFLUKCGPVUPMPNJIJMNOPNKJJJJLOPONKJHHFCEFGEDCBBBAAAB@AA@@A@?>>>?@?==>?>=<>>?>?>>?>?=?>???>>>?@=;;<<<====<>>?<:==>=<<<:<;;<=<;;::99;<===>>=>;>?=<99<@??=<<=<;;;<<=>=<>=?=??>A>:9<<<>>?><==??>:<=<<:<<A?AAAA@@@AB@@@A?:<:::8:89978::7778:=;:;<;998:<:;8777:=<;>?>>??HE@=;=L_cXSYXKFGFC?DHD>AEA=><=;<@DEDB@BA=<CD@?A@@<<BGGFCBC@A?=;?AB??@?ABAA??=?==?FDB@?CDAB?B?==>=<===>>@A@@A?A@BCBCCAFGGEEEGHFGHGEBABBC?>=>>==;??EJMMHFDAAFJKIHHC@A>AAEGCGDFEFCFHIO`nwlnqnglljaTFDGOKFJKHEEGKOGCD?C@>@@?>DI?<?@CDC@ADFKIFGFAB@??ABC@B>AA>>CHHFFMRNJOVUXURRMIHKNOPQNKLKKKLNPNKIIGHECDEFDCCBAAA@@A?@@A@@??@>??>>?>??=>=?=?>?=??>>??>>@=????>>=;<>>====>?>;;=>?>?=>=>==<=;:<<<====:;<>>><><>==<9:;>>><<<<;<<<:<><>=>=<?==??>>99:8<>>?;:>??>===;;9;=?@?AABBA@AAAA@?>:;:99898899999:8679<<<<<;878:=:;88758;<<?@>?@>C?=;;AKQPKKOOJGFC@?DHE>AFG<<=DB?AEEBA@>><;BBADCCA;<EHHEBBDAA?=<@BD????AAAAFB?<=BEFDBAEI@BBEF@;:<=>>=<<??>??>>A@BAACACEFFDECDCCFGFFDAA@@A?=?>>=>=BCFMMEDAABDEIKJIHFFEEGHJHDCGHHEGGGUcqsruvumhighhOGR^\NJJKIFFJKFFFABA?@@@BCI==?@CCECCEFFFEEDB@?A?BBCABBECFDCGFDIRVURQTRSSWWPFDLOOPONNOMLLLNPNIHHGHDBCDECBBAAAA@@A?@@@??>>????@@>>>>>>?==>=>>>>?==>><>>A=<>>=>=>===<<=>>=;;<?>>><>=>==<::;<<;<>?>;989::=??><<97;=>>@;;<==<==;:<<>>===?==@==?>:;::;>>>;>>>?=?>::::=???@ABABAA@@A?@>;::89::9:88;::98688:9<<<<:99;=;;877579;;@?@?@@@>;<=CFFKIMNMFBA@?BFHI@>CF><DFDCCDC<??>?>?EADGDB@=?FFDBACEBA?=<ABE?@?@BAAAMIA=>BDECBC?BAJLIJ==>=>@@><=@>=??>=@AA@AADBA@CCA@?ADEECDEDB@@@@=<?==>?>>BFJGCEDD@BHKJLMOKECBBDBAABBDDEEHVbkmmmwvsoiihgUL]_aQLKLKECGHHHFB@??@?@AIM>?>AAGHCCDDEDBCBAA@AABBAB?CDCEFCFFFKZWWXWVXXUVWPGDIMPOROPPOLKIHJJHIGGHDBCCDBABAAAA@@@??@@??>>>>>???>>==?<@>>?>>>>>==>><>==>><=<=>??===>=<===;;<>>>>>???;><:;=<::<==<<::978;<;:<:778;=>@:::=;>=<<;;=====>==>?>>==<=<=:?><;=>??==>;:;:<???@@CABB@A@?A?<=<:99:99;89;<;8868699::;=:98:<;:::7766:<<?@?@@>>=@FHEHHFKKJD=?ABBFJF@?AEA=?A@BDCCA>?>A@BDCEFBA@=AGFDCCCGFBA>=BCG@@@@BAAATND?@CCDBBB?A@GEDF?AA@>?A?>=@@CEA?>>BB@@?BCEAAA@BAAADFDEBBCC@@>>??>==>?AABFHGGDEGDEGCANOHCBCGG@@ABDDEDDIMOPU]_q|{m`dZSN[ndQLMFFDCINJEBBB@???ACEJ?>?CBIIEDDDFBAAAA@@?@B@?@??A?@ABEDFOWJKPMMPUWUPIECGKNNNNQPPNMHFFFGFCC@ABBCCAABAAAA@@@?????>>>==>???>>>=><?=>>>>?@?>>>>;?>==>?=<>?=>==<===>><===>=>?>??===;=<=<>=;::;<>><:96779::::6;=>><;:<>==<<89<========>>><<<>=?:;<8<====<;:::;;<>??@?C@AAAA@@A@>?;:;;;;;:99:<<<978996;<;=;988:<<;;:8769:?>?>ABAABFKHEDEGKMJC=ABD@DIG@=@DA>=@ACDEGDA><@>DGCFCBC@>BJGDCABDCBA>AFIFBB@ACAAB[PF@BCBCBBB@A@ECCE?A@???A???AEFHFB@??@@?BGHKGEDCBB@CDDBCBBCD?>??A@@A?=>@A@CFFFGHGDBEC?GKEB?@FB?@@DDAAAACDAEHMR`ronpVRMI]lZMLGIKGNPIDCBDB@??BEIH?=AAADJFEFGFEFBA@ABBBBA@@@@@@??BHHJNSFHFILLQXUOHCCEFHNNNNPPOKIGDECC@BC@CBCBB@BA@AA@@@?????>>><=>?????>=><?=>>>>??>=>?@=>>=>>?=>>><=<<<=<;<<:;<======>>>===?=?<===;<==>??=;98987:;;98;?=<>=<;=<<;79<========>>=;<<>>><9:<?>==;=;;:::;<>@@@@AABCCCAB@A?>=<=<>==99:;==>:896989><;999;:<<<;:99869>?>=@BCGGFGGEDINPNHC@?@BAFIF?=AB@>@BA?=?CBA?==@EFCHIEC@<EMHBA?@AAAAEIHFEABADBEG\\ZIBDDBBBBBAA@BABD@A??>?@???@CCCEIFAB??@DHJJIIGEED@CDBBDADCCA@?>>AACA;=ABEFHGIIFDDEIBAAFD@=@??>>@DB??A@??>?BCKLROW~qkWQKIMVY[VNIIHGJHEACCA@ADILIE?>BCCCDFGIKHJFBBA@B@ABA@@??A@@AGTREMQIJFEIKSVRJEBCDDEJNNNPMKIEDCDBCCACBDCDCBB@@@@AB@@?@@??>>><=>?????>>>=>=>>>>??>=>??=>>=>>?>>>==><<=;998;==>=<=>====?>>>>==?>=?==?<?>>==?>:877:;8669;<><>==<=99;<<>;=?=>?>><;<=>>>=:9><><=<?;<:89;==?@@AAABBCCCABAAA@?A==@:8:9:<==;887:9:><;;8:=>:;<=;;:9778:=>?@IIDCFFDHNNOJECB@>ABFFC@AA@BBDDA:67:?@>??@EE@AIFB?>GJHBA@ABEEFHJHC@A@@BEUbSKIHBB@ADBCBBA@@@ACAA>>>?@???@BBBCGEAB@?BFIKJIIGGFECDGCABAEDDCD??ABADA=@EHHHKIGGGEEIJEA@HDA=>=<>??@@A?@>?@?ABCFDDHJOYaYTQMNHS\XXRJECDFEFFDDFLNIMTRC=ACAACEHIGGIBECDC@A@A@??>@??ACCDILOKCFGLOOUSKGDCDDDGILOPNLJGCDCCBDBBCBBDCBB?A@A@@@?@@@A?A@??>=>???@@?>>=>=>>>>?>==>>?=>>=>>>=>===<<==<9:;=>>=>=>?>>??=>?>>>>>?===?=?>?==>=<<799878767:=><<>>=<::=><<;=?>>>==;<;<>>?=;878<<==<=<:99:<>=??ABA@@CDCAA@@AAA?>>=;897;=>><98878:<<<:<;=><;<>=<:::8988;@GHFEGGEHKJMLFCBCB@@DGDAD@@>A@CE?94348<>?@@@<9;BGJCDLHECDFHQPNIGIFECGMOTdlPDCFCDAAFFCFGGFDA@ABBA>>>?@???@ABBBEEBB@?BEHIIIIEEHGFHJECEBDECEFBACDDFBACCFFFIGDFIGEKLFDEIEB>;>>:?>>A@>@>A?>@CFFBBCABHKINVTTGY[NSVUNKMQSSYXU[_WMKWcL@BDCCCEIIDDIFCCHGB>@C>>BA@@?ACBAJQNGAC?DMO[QIGDBECDHLMNNOMHEDDDBABBBCCACBBABA@@A?A@AAAAA@@???==<?@@AA?>>>=>>>>?>===>>>>>=>>>=>===<<==<9:;=>>>??@>=@?>==>>?>=>====>>>????>==>=><:688779<=<;<=<;:;==>=>>>@>>=:;<9==??>=:979:=<><><7::==>?>AB??@ACCCB@??@@@@@>:798:<<==;::88:<=;;<:<>><>>:<:;;;7769>GDIHHGDGIJLHB@AB@??BEC?BAB=B@A>9653569;::;867:CYl`KKIFGLOX`TIFBDGGGMT]\NGHEGIHIEBEFDCBBEGC@BCBCCA@?@??@@ABA@CECB@?BEGHHHHEEIHGHJHHJJGECDEFDGHDBB>ACCCCDBBFHFCHHFGFGGB=?@<??>?@=>??B??CHJGECA?BEB@CJPY]hRHFIV][^YYX[_\`\RRX^\JEJGDCBGGHFCCDDEHDA?B@=>B@A?@ABCABKVJCA@DILZULKCEBDFHJNMMKHEDCBCBBBBDCADBCBCABA?AA@?AAB@@A@@????>>?@@AA>????>???>====>>>>=>===>===<<==<:;<=>>=>>???A>?=>>???>>>>><<??=??>=>>==<=<:8688:=;====<98:==>>>?=>?;;:;:9>=?@?=:9<;9;:=<>=8:<?==>AB@@??BBBBA?AA???A@=;8;:;==?<=<:758<<:;<;;==<?=>=;;:;;778<FIKEDDCEKJGE@BCBBA?@BA@A@B?B?:7545565565445568GqhTLIIPXqcJD@@>A?FEDCAAADFGIFGDDJGB?@BBC>ABA@BA@@@?>=<>BA?BEDA??BEFGGGHFFJIIJIGGHHFEEFGIGEEA@@=ACBAABABEGCBAABDEGHC==A>>?>?A=>>?C?@BHEBEC<=?A@ACDFN^fOGIGLLVXOHFJ[[WNGKOYb[SPJECGHFCBBECDEGCAA@?>=@BB@A@@@ABKSIFFFILKQVSNHGGEEIKNKIHDDDDCBBBBCBCDCCBA@A?A@AAABAAA@?A@??????>@AB@??>??>>@>>==>>=>?>>>====>=======<;<==>>=>>>>>@>>=>?@>?@>>>>==?>>=;;<<99:<=>?<989:=>=<=><98;==>>>=>>==:9:<<>?>@>=<<<<;::;<=<99;@>=@@A?@=?@@AA@<>@?>=>>;98;=<==>=<;<989989;>=<<<;<=?><<==;;77<FHFEFDDDFJFCBCDBBC@>AAA@@B?@A;43346774545465;G_¬ v[UVXh^KGEED@ABCEDCB?@@ACBDDCLJFCACCA?@??>@>?@A====?CC@A@?>?@BEEFFGGGGKJJHIFFFGEEEDEFEDCA@>?=@@@>@A?BCD???B>CDDA>?==>?@@@@?@@B=?CGDCCD=>>??BDGLRSSMGLMONKNICILRUSHFLOV`XPPNIGGX]GCDEBCCC@AB??>>@ABAAAAA@EPKGJMPMFGOUTMIMJEEJLOMLGFECDCCCBBCBBABB@@ABB@@@AA?@@A?@@@A?>??A??@A@@??>??>?><>?=?=<=<;=====>=>=====<<===>>==>>>>?>>=>??>??>>>>=>>=;;:::9:;<?>><><89<<;<=?>=;9<>==>=>?><;;:99==>>A=======<;:<><:9<?>??@A??A@>>??=9;@???>=:989===?@?::<899878<<<<;;<;:<=<=><<;8:;FDEGGFHFDGEBCDDE>EA>?>?@CEA>@=7234489535356;Jny¡»©pu|¡gTHIHDBACDEGE@>?==>?@CDGIHEBBCB@BBB@==?@A><=>@AABAAA?A@@BCDFGGHHLKHFHEEDFEEDBCDDCA@@>>=??>>?ACBD@A@??@@@??=>@>??@@@?@@BA><CD@CAB<?>?AGEMONRTQLLPTQNOHDNMRTVIGKP^^QJHOSOHMXMFFEDCEB@??@@?>AAD@@?@@AFPGGLMTLCG[^SIGIGDEINPMMHFDBDBBCDCDABBAAAABBA@@@@BAA@A??@>@>??@??>??????????@@>>==?=;;<=>>>=?>==>>>=======>>===>?=>>>>?>?>??>>>>===<;<=;;<=>>?>>>>=;9:8;=<>>><<<====>?=>>:9<99??>@?><=;===;<<<=<;;;>>=??A???@>>?>><=?@??><:999:=>?@>::<9:9:77:><<<:;=9;<;<<>=;89;FEFIIJIFDGD@@CEC;FDA?==?CHA>@>7244347744577=Mly»«t¢¡]CCCB@=BDDB?><?>>>>=@BFFCABCACB@@AA??@@>>>>>@AABDFDABACACCCEEJJLHEEHDDCEDDC@ABBA@@@>>=?>>=?@BBEA@?>@A@?>>?>>???@AAAABCA>CG?DHBB>=??DFBMNNPRQOMMONLLHDHVXXRFEIP\ZLHBEPSRRQMHGDDGHGCA??A??C?BD?BCBERSIGINSROQ`cTIKLFDEHMNLKHEDBEBBCDCDDACBBAAAAA@AA@@?@@@@@??@?>?>?@A@?@??@@>>??@?>?>>>>>@???>>?=>>>><<=<>?=>>>===>?==>>>>>?>??>>>>===;<<=;;<=>>>>>?>>=;88:=<>=<><;===<=>?>;99=<;=?>>=====<<<<<==>=<;>><<=?A?AA>>?@>><<@@>@=<;899:=>>@>::=<:;:888===<9;<9::;;<>=;88;DFHLLIHEDDCDCBC?@FE@=>?BBGA>AC:54443797568;?GPf·s~«cFFCAB?@A@>@?@HGE@A???DFD@BDBBCCAA?@@@>=A@@@DCBGCDCBCBEFFGEGGGBDBBBECCAA@CB?@@A@@A@>>=>>?=?@BBFBA??BBA@????A=?>@AABADFA?FH@EJFA?>@BD@@IIBADKOKKQNGHJHMTY\QDEHMQTGBCCFIJQUMFABEEGHFCB@@FEBACBCGEA@ONIFIKNSXX[\NHONDCEGLNKHFFDABCBCCBBBDBDBA@C@A@A@@BABB@@@???@>?@??@?@?@>?@>>?>>>?A?>@?@>?>>?=?=>>==:===?>=>>>?????==>>==>?>??>>>>==<;<==;;<=>>>==>=>=;97:===?:;<=>?=<>??@<;:<=<=>>><;=><==>=;9===;8<=<<=@@@@@?>@>>=?>=@A@==:99:>@>>@>;:==:99997;<>::<<9:;;:<;><989DHGGFFHEDACECCBAFJF@=>?AEGC?@E<<:4335::98;==<B^®m}wr¢dMIFDBA?>>?BABJLHEF?@>ABA@BA@?@ABCA?><=?BAADECCGFIGFDFHHHGGGCB?@ABC@BB?@ADBAABBCABA>>>>?>=??ACGCB?@DDBAA>>??=?@ABBDADH@@CA@FHB>?BEFA=BIG@AAIXPMPKEFJILRPJIEDFFGLEAEHIKKPbXICADFFGFB@@CFE@AACECC@DRPIGJLMMKMQOJKQMEDFIMOJFFDCCCBBCCBBEBDCBBBBB@@A@@@@?@@????@????>>?@A@@?@@?@@>??>>>@@>??@@>>=??=>=;==><=<>>?>??=??=???==>?>??>>>>==<<===<<<=>>>==>=>=;98:<<;:9=<<>=>>?=?><>;;;9<===;;===>>>>><=>;:89:;=?@?@AA@??>>=<<;=@@>:998<@>>=??;:=?<:9::8;<=>:<>98=<;;;;><:8BGFDACDBABBCCDDEJIDA<<>B@AB??D;<751248=;98<=8Ae¡mgu|ppm{gSLEAACA@@???@BEDFA>>=><>????>@??@?>=>@BABDGGHKNJMJHDCFGFBBDBABBAB@BDBBABCDC?A?BABA=??>@>=??ADHDB?AFECCB>>?>>?@AABB@CA?D@?ACA?>>>?A=>CFDA@BLbZJJHFJJHGGIHGHFECCCDCHJNVPdcZNHGFGDDDBBACECCBAACBAEQYQJGJOMLMIIGHLPKDEFJMLKEDDEAABCCCBCACBBCA@CAA?@AB@@?@??@@AA?@??@>@A@?A>==>@@???>??@@@??@?>>=?===<<=>=;;<=?>@@>=?@???@=>=?>>?>>>>==<<=>=<<<=>>==<==>=;:9:;;:99<<<=<==>?>??=<<::==?<;<>><<==>=<<===:;9:>>??@?AA>>??>;::;==<:7:9<=@=?=<:9<==<;<;;;<==;<>;9::<;;8<=<8AGFB?AAAB>ABJMHIIFD@==@@?@BA>@:5331129=>689;:>T{{YV^\U_m|naUG@@CCAA????==AEC?<<>>BA>?AACB@?@>>?CEEGJJJKHHFHGFBBBCB@@A@BEDBCEECBBCDCDA>?>@BB????>>>?A@@GJFC?BIFDDB>>??>?@AABA@B@?B@@BCBA@>>AB?@GJEFEGNZWGEBGIJJGFDFGGGEDDCBDGL`]Pbda\LHEDFCD@BBCEDCCB@CEDFPXXSQKOLNLHGFGKMHFFFJMKHECBDBBDBDDDBDCCDCBA@B@A?AA@A@?A@?@@@@???@@@@??A>?>???B@=A@@@?@>>?>>==><<><=><>:<=?<=>?==@?>>>?>>>?=?>?>=>=<<=>?>====>>==<==>=;:::::99:<<<=<===>=>><<==<?>>==<>>=<<<>>><;>><<;<>>>@@>>==?>>===<<:99::;><=?=<>::7<=<=<<;::;=<;<=:89<;;;9;=>9CD?==>?BB@@CS[SPKGFB?>?ACCDA>@<7433257?A;:9=ACJq}WLQTSWf|zh_MD>B@?@AAA?<;@DB?==???A@ABABC@ABCBCHJGFGEDCABDFHEDADBB@ACBDGC@BCDAABEFDA@>@>?BC@@??<=AABABHJGCAFLGEFB>>@???@A@BA?A?@A@ACDCBA@AAB@FMOHGGCFHECAAEFIIGFEGIIGEEECDFIQWTVcikeYKHP^QIEDBDDDCDBBBBCEKPKONPTQROGGGJLHDFHGKMJFDCBCBADDCDDBCBDBBC@B?BA?AAA@@?B?@@@@A????@AA@@@?A@>??@@=@???=?>???@?>?>>>==>@>>=??>>?>><?>?>>>?>>><==?=<>=>==>???==>>>==<==>=;;;:9999;<<==<===>==><<<=<>>>==??=<<<<=>=<;=?=;9;><@>@>>:<@?A?>=>>;999<??===??<>:89;<=;=999:=>;:;:89<;:<<=:=;HD????AEDAAGPUVMKHGGC><AFCB@>AA9444467;=9:<BOM_dMTVX_m}i`[N@>>@A>ACA=;?BA@??>>>AAB@B?BDBBBDADBABEIFCABAEHFBBBBC?CADBD@@C?ABABCDGFC@@AA?@FC@?;??CDCCIJHECHJFBEB?>??@?AA@B@?@A@@@BDDDCCBDABBHMOJGHGFEEFEHIHHHDCHJLKEFEEFEFJPLJQU\_]]ULHSQIGBBD@EDB?BDDCJQPLMQSTRXSKIGKJEELKHMJHDCCCCBBBBCCDCCDDDBCAB@B?@A@@?@A??@@@B@?@@AABA@@AA?????>>>?@>>>@???@@???>===>>>>>>??;><@>===>==>>==<<;<=<<==>=>=???==>>><====>=<<<;999;<<<==<====<==<<<==>>>==?><<<<=>=>=<>?><9:<>?=@@>;=?@A@?>=><:99;>>=<<><=>;84:<;=<<;:8::98:<99<:::;>=>:JGABEDFHCBBFBEJJJGJJE@??EDDB=AD;565558;989:>IJYjQSZfoyi][QC@BCDDCB@?<?B??AA@@BDDDDCC@@?>@A@@?GDMTIABA@BDCCEGDCAACC????A??BAAABFIFB@@@>@CD?>>?>AA@CHIEABBEE@=>?@?@AABB@BC?@DA?ACEEEDDDDBCDJNPLGJKJHHIIHHGGHBBHGJFBFGDECDGGAAFKRUQSXJBGJFBD?BACDC?DLQINOKJLRSQPONHFHGFFILJLLHGCBACBCCCBCDCCDBDDACBB@A?B@@@=@@@A@@??@?A?@@@@@?@??>????>=@?>??@A@@@@=?>?>>==???@?>>>=>==?>=>==><<=<=;;<<>?>?>==A=>??=?=>=?=<?====<;:9==<=>=<====<<=;;;==>>>==?><<<==>=>=<>>?<9::;>=?@?<>?AA?>@=<;<:::;=>==><<<<:6788<<<9;577788:98:;<::<>=<GFBCFEEGFED><=CHHHHJDB?;@DGD=>B;6554689:;98<BGZ|bOReqzp`WUMEBEGDFECA><>>=<?BCEGECCB@?>>>?@??@AJJTSK?A@?ACBCJICCAA@@@@@@BAADBA@CCCDBA@???@A>=@@?@AFFDD>?A>@C?>=>?@@DHGFBFHBAE?@ADFFGEFGDBCFKOPLGKONKLLMIHGEFACFGJGEJDGHGFHJFEIQQTSOWVIIMLGECEBBCGAIOYUPJJFLSQNNJFEEFGHIMONLHHDCCAACBCBDBBBCDCCDBCCB@@@@A?@??A>@@@@@@@>@A??@@>?>>>=????>@?>???>@?@@?=?<<>>>=>>?>>?=><?<??@>=>===@=<:;>?>>=>?>=??>>?=====?==>>>>=<;;:;;;;==<====<<<;:;=>>>>==?=<====>=>==>>>;999:;=@@?==?????>;:;;:9979;<<<=<==;9666676777797:98977:<;:9=>=BECJKDDDFEA<;>EGGJKHEC?<@EEC>>@>656479:<::9=FMWdvx\PVinui]UPIDDEDBBCB@><A??A@BBABCA@;@?>@@@@??@=DJMGD?A@?ABBAEHDBABBA@@ABD@@?AA?DCEBA@A?B@??>=?@??CHJDA?>A>?@@>?>?>?DJLHEJNHDC?DDGKIGEDCBCDHLPQLGMSPNPOMJGGDEADDGKHHJFEFFILLOLJLMRRKMUPMRQJDCFDC@DHLX`TKKIHUXVPMGDHHGIKMQOOMGFEAA@BBABCCCCCCCDDCCCBAAA?@@?@@???>A?A@>AA????>>@@@@???>>>>?>>>?@=??@@B=?>=>>>>??<<>?>>>=<>?@>==<<=@<?<==>?=>=????>?>?>>=>?=<>??>?==;::99:<==<==<=>><;:;>?>>>==?======>>>>>>>=;:99:;<??><<=>A@=><::;:;9:6889<<<:::8656554555687:978777;:99=>=@@HUQHGHDCA>=?FKGDFGGC@@@@@B@<?@9355569=;<;>IXhkvucXOadfxtjYUTKHIHHCBB@=;?BCDC@>=@AA@?;ABCB?@@>@A@BBB>@@ABABAB@@BA@BBB??AA@C?AB?@@FGFCEBB?A@@AAA@@BAADGDC?@>?@??>>A>>@CJLJGHLKFCCEGILFBECAADHOJECFHOWSQTRNKGDCDABBGKIKJHCDEHJMNMLNNORPUmdUROIA?CFDBDGSWXLILKIMVXROGDKMIIMQPPNJGEEBA@BAACDBCCCCDDEECBBBABA@A@A@?=?@AA@??A????>?@>?A?>??>?=??>>>>=>>>?@@>@>>>><@??>=>?>=@><==>>=?<:>?<?=?>=???>>??==>>>=>>>=<<>?>=>><<7:77:;=<====<>><<>>===??==?======>>>>>>>=;:999:<>>=<<=>@?=><:9;::;:8777:7867766546545578888877777;99;=>>@EIWULKHDC@=?>DIGFFGGC?<>@?@?>AB>674469;9<=<<Qns~~pWO^dbghdim_^_RIMLFCDB?>@FFDDB@>=?A????JHGC@@AA@A?A@@??BB@CB?A@?@@?A?@>?A@@A@BBAAADFEEIFC@B@?BACA>AA??@@@A@@?>>?>@D=?ACDIKIGJLLJGFIFCEDDB?DHOKDA@EDBQVSXWOLGBBCA@@GLKNJFACDGINNNNPPORQUjcYPEHDDEGIJMOQPLJJIICLVWNKEFMOKIKPSQNJGFDBABCABCABCBCBBEECDBCBBBA@@@@@@???@@?@@@>@?@>?>>A@????@@????>??>>>>?>???>>?=<???=>>>>?>><<<?==?=;:=?>=?=?>>>>>>@>?>===>==>;<>=>?>=;<8:87:;<<<<>=<>><=>>=>>??==><=>>==>?>>?>=<;:999:;>=<;<=>?>=><::;::;:88955674657645556767778899;8789;8:=>>ADGRQLHFCEA?@?AGKKHGFEB=<>>??>@BA=;67:897;?=;LkqvYLV^]WV\hmgmmTEFEB?A@?CLIC??@@?A@==@EKLJHDAABAAAAC@AA?@@@AAA@>>?AAA??>??AA@BCA@ABDFHGGIDAA?DABA@?=?>=>BCCB?><=??@@>AEF>BAEGKKFFGGGBAFGDADIMJACAADCALTS^ZMFEDDEB>?HMMQJD?ACEHOOOQRSPRSVgbYTMNGGGGLRSSNKMLJIHFKUTLIEGKMMGIPRSOIGFDBBABAAABBCCBBDCCBDCCABABA@A?????@?@???@>A>@@@@=???@?@?>??>>???>==>?=@=@>>>?>>>@>>?<?>>>?=<>><<=<;<=>=>>=<==?>>?=>>?=?==<=>===>?==:<:898:<<=;;;===<;<=>>???>>>=;==?>>>???@>=<;:9989;=<;;<=>?==><:;;;:;:9996667556:;87656766777887::87899;>>@CCFNMHGEBCAA@@?CGKFEDDAA?==>>>?BBA?<=><<9>B@?HV]u}gULLRTVYcovvpaMEB@?<?=@BDB@?>?@>B?=?CHKIECBA@?>@@@@A??>>?????BCA@ACAAB>AAA@CCA?@BCFGFEGGFC=?CAC>@@A?@>?BEDCA>=>>>?@CFG@?A>BJMNFFCDA@BCCBDMQKDBCA@CEEGNL[SGFEJGGE?>EOONF?>@CDGPPPSTRPRTWebXYUTJJJHMRSOKILKJKHDITTKGEFHKLHJNPQQLJGDCBDCABBBBDCCBCDDDDCDBCB@??A@?A@>?????>A@@???@@?@?A@??@???@???>>>=?>>=>>???=?==>>>?=?>@>==?=<=====::::=>>>>@>>>?<>>?=>>;=>>==>>>==<<:6788<=<=:;==<:;>>>???>?@>=<<=>>?>?>@?>>>=;9989;=;::<=>>==><;<<;:;:9997767666::87655877678877887769<;<=>DBEIIFFDBBBDC??CFHDDDB@AA@=<=>=?@BD@@D?;<>CDCGJH`cVROMHLQYd`Z[WMGC>?=?A@AAA>?A@?@@?<>@DHGECABAAABCBA@@>???==>?@BGJHFC??A?@BCCCF@?ACFFGGHIGGC>ABCE@BCBD@CC@A?==??>>???CHF?>BADKKLFECA@BA@ACN[VICCBABECBEJISJEBGIHHHA?J[QDB?>@@@FRTQVWRQRUXba[^]WMNMHNRSKIHKJHHHDHPLIIHEFFIIKNNPQLIGEDACBACCBBBBCCDCECDADBB@A@@AAA@@??????@?>@??>?@@?A@?@??>??@@@>=>?>??>?>?@@=?=?<;>=>=>>@==>??===<>==<::<=><=>=>?@<=>===><<?=>>=>>>>=<;8758:===;:><88;=>>>>>?==><=>=>?=>??@?>>?=;98;;:=<9:<=>>==><<=<;:;:::98877777::8776686766788887788:<::;<FBDEFFFCAACGE>@CFEBBDB@AB@??>=>ABEJC?DEB==@A@ADGOMMMGEEFGHLMIGFFD@=>ACBCCBBAABAA@>?=?=DDDDAAA?ADCBCAACABBA=<>?ACEJHGGC@=BCABBCC@@CCFGIJLHGE@=>ABDEAABBACEB?>=<@???@ACEFD@?@BEIFGDC?@@AACCQPQQKDBCBDFDADGGECCDGKNMIE?J^TB@?@@?AENSNYb^WUUY`a_ceZPQPIKROGGGJIFEIEHMIHHHEFFGHLOONNMJHEFECBBCCBCCCCDDDDCCBCBC@B@A@?@>@@@??????>???>@A>@A??@??????@=?=>>=>>>???>??>>?<:==>====>??>>=>====;==;=>>?>>?>>??>=<>=>=?=>?>=?>>>===<9557;=>==>:78:>?=>==?A=>>=??>>?>??@>>=?;<77=::<;9:;==<>>>==?=;:;:::99977888:997878967667887777778::::;D?BDCBCBA@DJF=@CEB@BDBABC@?BA?@BADDD@=BE@?BCEGIJHHGGEFGBCAAAA@EGC??CBBABCCB@??@?A>@?@=A>@JDB@>AC@?A@>BC@????>@AAABCEEB@@?@??@B@?BCEGHIJJHEB=?@>ACDB?@@>>@?;==:?>?ACCFEDA@@ADGGDC@A<ADEEFMLX_XKEBACBEDADFA@BCFNQZQMJ?EVRD@??A@BEIMNT^ZSORMW^]_b[SUSJISKCEFIIDEJFHIFHGHFFGGIMNNMNMJGGEDDEBEDCBDCCCDCECBDDBB@AAA??@@@A=??@>?>??@?@A??>???@?>@>??@?=>?>=?<>?@>>>>@?=<;;?@<?><=?==??>?<>??>==>>>>=>?>>??=<==><<?=>===><==;<>?<8668;>>>;;89<?>=>=?@?<>>>>=????>?@@>??:986::8;998;<;===<;<==>:;;;::::779999997889957667887778778999:;D?@BA=?BCCCGD==DE@?CDBABD@AECABDADCBA?BC@CFEEDCFHGDDEGEACBCCBEGEEBCCB?@AAA@?@>>?A=C??=<=@BAD????AA@><>??>?B@@A??@@DBCCB?=?>=@DBBAAGKLHEIHG?=CCDBCBA??@><<=><@AB@ADKIGABC@BACHGED@>>CGMPPP]mtt\LFEDBFEBBCABABKR\UTPLB@PUD?>???@DILGEMNIHHGHQ\`_UVX[TLLE@CEIJBFKGHFDGGIGGGHJNMMMNNJHHFDDEDDBDDDDECCCBCCCBBBBBA?@?@A@A=?>A=@@@?@????????@@>>>@?>>=>=@>?@?>>???>>>@?><<=>???<>==??>>?===?>>=>==>=<?>>>>====?><?>>=>>><>=;<>?>;7669;<>><:=<<>?>>@>@>?>???>=>>>??@???<79;989;8998=:<;99:;:<<:;:99;;;88:;:98979;;957667887788778899:;C=?A?<?ACCCDA?>EFD@@DEBCE@DHECDE@CCBCACA@CEFEECEFGDCDGFDGFDFFEDEGDECA@?BCA@BD@=@@>@??@=?=@@A@AA?EEC@AA@@BFGB??ABABB@@B>?=@?>CCBCCAGKIIHHFEA>BDFDDDA=<=>=<?>>CHHFDFJCC@AFCGECEGC@ABCDKSTTd|xz}ucICCCFDCCBAC@FKMSUUSMB@NWK>?>?>?CHKIEFGHHGFHMXc_W\SUQRDBADGLMIKLHHCBGHIHGHJKMMMMONKIIGEEEECBDDDDDEBFCDCABCBCB@@A?@>?@??>@?@????>?@??@?????>?@>?@>>=<;>?<>>?>?=@?@>?@>===>@>><<>@==>>=>>??>>=>=>>>==??>=>===>>==>=>><=?=;?=><;557;>>=<=>?>>>>>??>=>>@@>@?=@>?@????<79<:8<;=:9;<9;:998989;<;978:9:7579878:8:>=847667887689777889:;A>=DA@ACEFCEAA>CDEC@DFCADEGIHFFG@CCCDCC?@DEHFGDEFDCBADDGJICCCBCBDCCEA@@DFIGFHA=@@AA>?A??@@@@ABDBDGC@EBCCAFID??DFDCDDADD>AA@?DDCDDBCDEGFDBA>=@BCFDBB?;=@=?BC?BGIIKJC?BADFDCDCAEA?BDJQ[SKawogk]HEEFECAABA?HPQWWVZUG?EHE=?<??>CHIFFCCFFDDINX`]WTNWUSBCEGFMPV_TJJHGJLJIHIMMLLLMOOKJKHFFFECCDDDDEDBECCBAABBBA@AA?@?????@?>?>?????@A?@>>A??????A?=;:9;:<==<<;>>>>>A??>??>??>??<==>>>>?>=?>?>=<>=>>=;:=?=<===?>==>>>=<<==::=:<<746;;<<=>>??>>>?>>>===?>=?A?@?>@>>?>;89;97:<===<<;:;<>::98:;988::887568778:89<;647668987689767789:;><?EBCDFGGEJE@=DDBFFGGEGIIHIGFHECCDFFED>AEGJGHDEDBBA?BBEEFAAB@BBCBCE?@CCGJDEGD>>@@@B@??@AAAAA@BDGFFDC@?B@BDB@@EFDCDDFGD?CBBBCCEGAACDFDCBB@??>?BDDCB=;=AAFGDCBGIHIG?>BEFDEECABECBFSZU\Zksg[Ub}xOEDEHFB@A@AHPY`\]aVC=???>@>A>?CFDGDEDFFEDLPU\YTLIPRGDGJJLMQQTILKKKMMLJIINOMLLMPPLLLIGGFEDDEEEEEDCECCBAABAA@?@???>@@???@@?@@@?@@>??A=??@?@?>>??><;;=<;;<:9;;=?>>@???>???=>?><<?>>?>>>==>>>?><=?>===;;<<=>>??>=?=<=;<==;9;=><95678:>>>?>=>>?@??=;<=>>>>=?A@?????><<:;969<<=><<>;;;;=;;:988<;;:856668778899;967966999769:766679:;:<@ACFFDCFEGIC<AB@DFKKIJIGFIGEGFCBEFCBDBBEJLHJEEBAA@<?@AAD@@A?AADEDD?@ACHIDFGG@=>?AEB@AABCFDC?>AAFHEA>?<?A?A@DECABCABCA@ADEFDJJGADDFJFEHD?>>>@BCECB?;>AEKIGCDEEDFGC@HJJCDBBBEIIJQU]R\q{neZT^`KFCDGEDA@BDLSgjib\PD@@@?>??@BCFGEGGEDFMMHOdd[TQRPLIFFIJLPNHDINIKJKNIKJIIKPQMHHLOOONJHHGEEEEEEEEDDECCBAABAA@?@???>@??>>??A@?=>@>>?=A=>?@A>>===>>::=>>?>;9;;=?=>>=?>>??=@>>=<<<=>>@>=>@===>>>=<>=>=;=<<;:==>?>>==;:<<<=:88;99<8678;=>==??@?@@@A=:<=>?@>@?A?@>@@>>??=:778;<<<====<:<:::;:;;;988878;<;:;97:;:7;:966:986788767679:;8=BEIHFA@CCFFF;<@>ADMKEGDEDFHGFFFCCCABEEDGGHIKJBBA@?:=><>A??@>@BEHEC?@ABFFCEECBA=?>B?AEEIJIGEDC@BDBA@>?@>?@CCDCDEECBBB@>?DFGGHHEBECLMLIKE?<>>@ACDC@>:;AEGGFEGDBDDFBBKMKDBBADHKT_]UPTm¡tl_OHGECEGHDCABDJLSonnc]MC@?@@?>@BABFFEIGHEKXTXX^eYPMPPMIIGCDFJMJHJRKKLLLGIIKIJMRLDEJOQPOMIIHFFFFFFFFEEECCBAABA@??@???>@??>>??@?>=<>@>>?@=?>>?<?>=<<;:;=>>>>>==;<=?>?=>>?>?>?>>=<=<;<>?===<=>>>=>:9;;<<<>==<:;>>?@>=<;<=<<=::6586=97:98<><>?@>?@?@@=<=>>>>>>@@>?@@A=@@><;;76:<<=>>=>=;<=;:::;::7:799:<<<;;:8:<:9<<;67;;88979677578:<=ACEEFGCABCDDB:=CCCJLIGGADDGECFEEFGDBBAABCAABCA@AAA??<>=??>>@=@CFKFB?@ABDDCDCAAA>@?BAA@DDFFHGGFEDD@?@@?@?ACEFDBCDEBADFBADDBABCDABDCJIHHGC?=<>>>CBD@?<;?BDEEEDDBEEDHHGMHEBADJNS\zx]i¡¥t`RRLDCFDBDGEDCBCM^cbefkiiOAAAA@@?@@ACDDDDDEJV^Qe[Ve_RLNJIKIIECEFIKKJMIGLLLPLNLLIIOQGFIPSRROLJIFGGEFFGGFFEDCBAABA@??@????@??>>??@?>=<>?>>>???@>@>A=>>=>>>?=?????><=@?????>@?@@??>?:::88;?==>>>>>?==<99;:9:>>?>==:<>==<==<<<<=;87676;:88:==>>>?=>=@??A==>>>>>?@?>????@>?>>=>:67;=<=>=>?=<<;<<<:;8;;<9;:<<:798;7788:;<;67:<;997:686567:<@>@BBEFDDBBB@=;<BEEIHEBDGEDHFDADEEJGBBBA?@@@BCA@ACB@><>?>?>@>>>@GNHB?AAABBBCA@AA?AABAA@DCDDEEFCECA?>?@BECDDEECCB@ABBEIFFEBA@CCBBDEDEEDFF@=?B>?<@AC??<;=@CCDDCCBDFFEHHLFBBFJOUVTu~¡¦hLB@BCDGGEDBBBDABNouzxmdJB?A@@A??>?FBBDEEGKUZWr{R_YRNOKLMNORHFDGHGHHHHKMNROKMIKKLNIKJQSSPNLLJIIHFGGGHEEDCBCCCCA@??@????@??>>??@>>==>>>>>?>>?=?>@?>@?>@>@>@=?>??>>?>??>>>??>>?@>?>=>869;>=??=>??>><::;99;=><>=?=?;8:;==;<===<9655689:89?>=>??>??>?@?>=>>@?<??>>>?????>>>=?=:79<<=????====;==:;=<:;;=<<;979897558::;:77:<=;:7:796778;;??CD@GDCCACB>;?BDDEFCABEFFDEFEC@DFHHCAA?>?@ACB@BA??@>>>>==><??@AAGHC@@@A@@BB@@AA@BBBABADBBBCCDBCBA?>=>CGFCBBBBDB?CFEEIDFEDDEFECAEHEDBBEC>==BCA>@BD>?>?<>BCDCAAAACDBBIJCADFGPSJDQaz}VBMQKHKQSMLIEDCCEFd~lZFBBDCEF@@ABGABDEFGHIQ[VSY[MNORLSOQRXNGGHIEEHJKLMNLILKMLJJILKKNPRONMLKIIHIGGIGEFECCCCBD>@A@????@@??>>??@>>=>>>>>>>>>><>>?>>?>=?>>?>?>??A?>??>>>>=>?=>??>?>=?<6778<>?>><===<;<<:89<=:<===><878:;:;;:888998997879>>>>@>?>??@???>??@??>????>???>=>>=?>=77;=?A??>>@>=<<;;<;<::;<<=<;:<:9857;<;==77;;;<<89987788:<=BIBCMCBB@BA>:ADFC@@@BCDCDD@CD=@EFBFABA<>??ABEACB@@?>?>=>===<>@@ADGCB@@AA??C@?AABCDBBBADA@@@BCABBA?>>@CFDA@?BFECCFJIIIDEGDFFEDCBGJDAA@@>=>@ABBABBA?@>>;>ABC@???@?@?AFFBADHOSJCADKV{tUI_|ydVZdcVPMFACCCET¯«vWDDGIGGFD@ADFC@EDFEFEDFHR^[OLKNNOOSSRNILHIDCHKHJLKKIIKKKJJHKKKIKORPMNLKJGHHHHGFFEDCCBBAA?@@@?>@>@@??>?@@>>>?>=>>>>>==<>>?>>?>=?>>>>>>>>>?>=>>>=>=>>>>>>>????<77768;;?<;9<<<<<=;88::;<<9999554656776546558886457=>>=@?<=>=@>@>>=@@?=?@?@?>?>>??>>>>=<:68><??>>><@>=;::=<:::;;<=;<;;<::77<=;<<68:<;<;887787<96:>@CEFJA@CBAA=8=GH?=ABECAACD@=<@BBCBC@?A>@>@ABBCEEBBAAA?==>@>><?@ABDCEBA@>@AA??AAACCDECBD@?>?AB@@AA??@CDEC@??BGHGHJLNLGCDEDDFECBHIHB>=?>==@BBDBACCCA@>?>=@AA?@=@?A@?@CEB?BLVQC?@BBGQk{Mcw{w^PKECDCCEJn¢ª|TBHFGGIIEABCHDADDEDCCDFIWWMJJONMRQSUOLJMLGDDGIEFHGJLGINMLLHHIMKHKQQPNOLKHIJJGFGGEDDDCC@AA?@@>??>?=>?@?=>>>?@?=??>>>=<;=>>>>>>=?>>>>>>>>>?>=>>====??>>=>?>>==<7766666:;=;>;;=<=;9:;99><99654656546856466777766769===??>@==@@=@><????@?>??>??>=>><====;67<==>>?<@;?<:::;<;;::<=<==::<;::8;;<=865;=;=;;868967879@??CECCCCBCB?;:FB==EDFGA?BF@;<@B?AEFA@BA??ACCEBDCDDA?>>=>?A?<<>?BA?BCDCB?@CB?@????BDCC@@?@??@A@?AA@@AEDDA?@?BHKKMNNKJFBCDDDCAAGHHED<<???>CECCBABCDCC@>?>>?CA@>@@DA>BBD@>AFPMA?CC?AENb{~X|q[NEABBBEGa¡pJDJMNGHFFB@FKDBDEFECDGGK]UJGFFKMQTSSLHHKLEFDHIIFHEIIFHKOOLIIKLMJGKMNMOMMJIIHIFHGFFDDCBBABAA@@@??>?>?@=??>?????>>???=;;=?>>>>>=?>>>>>>>>>?>=>>====>>===>?>===;:87775678<<?=:::<:89;<<=>>:775799:97888778<:;<:<;88;=>>=>>???=>?=>=?>=??????===?@?=;;>?:69<==>>?><>><;;99<8:9;<=;<>;<><<;88;<=:76:<=;;:;77:9768:A@=>AABBAAAB@><HB=;DBEFBABGC<;>>@ACC@?AA@AFDFCACCDF@>=<=?@@?>=>@CB?@ACCC?>AA?@@@==?AACC@@AABCGDAACBBCHEC@@A?BINOQNHIHEBCCCEDBAFFEED;@@B@ACDHECAACDECA>>?=>@?AA@DECAA@A@>ABP]LBCBAABFJbo~tOC@BBBDBZ¡oJIPRTJFEJCEHKB@EGEBILLJO]JGFGGLOOQQOLIHIKJHEEJIGIIFDEHJNOJJKKJLNIFHKLONMMKLJJHIFFDEDBAA@BBAA@?@?>@?>@A??>???=>?=>?><:=>@@?>>>=?>>>>>>>>>?>=>>=====>===>>>==<;::99:;;;888<==;99788;;<<:88:97:;<<<9;<:88<>;>>>?A=;<=>><>>=??>=?>>>=?=>?>@>?=@=@??=;:;<88;;=>?>=>====;::;::88<<>;;<<<<==<99;;?;78:==<;=;77:9657:AB@?AB?>@BBBA==HD9:>ABEBCCEFA<;<>AA@>>?BAAFEC@@CDC@<<>>>A=@?@>?BCA@@?AAB@<A@?A@??>@>AAAACEDDFDCDEBADDDBCDCB@BJRTNHFGFDABBCFECBEDCCB;?@ABD?DCCCDACCBA@@?@?>>>DECDBCBA?@D?ADM`VGDA@ACHH`}bf}WEC?@@ABYnsb]\WYZNHGLIDFBCBFGCDILLMW]OCBDFGLRROQSNIHIKGDFDCEHJFAFJLIMKKMLLLNOKGHJKMMMLLKIIIGEFDCBBAA@@A@@??@@>>??@?????>?>>@??><=>>?@@?=?>>>>>>>>>>>?>=>>========>>>>==<;::99:;;;;758888667:9<98:65676798;<;<==<<:9:7;;>>=>>><>>>=>=>?>>??>>>==>?=>>@=>=??>=;9:978;=>==??=>><?:8;::<79;<=<:<=;=>==;:;>?=968:;><;;76:;8778A@?BDA@?@DCAA=>D@:9<@@B?B@BFB><<?????>CDABCB@@AAB@;:>=@?@@=@=>AB@AA??@A@><BAA@@@@?>?@?HFDDDCCB@ACA@ABB@EEEFEHQROFBDEDCAABDGFDBCBAA@;?@ACD@CBBBCCCF?A>??BC@?AEFFDBA>BCAHA?BJSMHEB@@BGFksZOecW_dhXMIECCH\bfZii\WTLIJLKC@>?CFDCCDGLT_]L@?EIJMUYTRTNKJJLJEEEDFFJHCEJNJKNNOOMLLPNGGKLLJJKLMIKJGFDDBBB?AA@?@@@??A?>@?@?A????>>@??@?==????>>?>?>>>=??>>>>??>?>====<===>>>>==<;::::;;;;;86888864678:99:76565897:;=<<==<==97::;<??@=<===??=?>=??>>>??=>????@??>??===;98779=??>=>?>=>?=79:::::::<=<;<;?>?<:8<=>=9669<>==;89:;9666B@>@>?AA>?BA@??A>9:?AA@ADAACFBBAA>?>DADCBB@=ADA?=<<;=>?>?>@===ACBDHD@A@?><AB@@@>???A@DJKFBA@DDA@?@AACC@GHGJPPPGDA@@DDEBACFHHECA???>;?@BEEABAABBBBD?@>?@BAA??CFHHDA??@@EC?BIVKFEGBBDIFi}ihweHHINdfLEGFD[j\TLLKIHFGLIBA?=@BBEDIPNR[IA=>FMMNQQPQQOHHKPNGIHGEFKKFEHIIHJILNOMLNPJKKMLIIKKJJJJGEFDABA?@B?@A?@@@>@?????>@?=?@>@??@>=@?>>?@????><=<;=;==>>?=>>?>==<===>>>>==<;;;;;;<<;<97999865788::;=;:;:68;989978:;=<;:89889:;<:;;<@??=?>>?>>@>>>>?>>?>?>==??=<:778:89:=>>=>??>>><9::;;;<;:;<<<===??<;:;<=>:657;=>=;:::::7:6CA??=@EB<==CB@@;;:>ABD@ADB?BCBA>>=>=CFDABA?@@AB?;:<>>=<=>>;??ABECGIE?@?>=>A?>@?@=??@CECBC@BADE@>@@BDDBEIGGLPLGA??=;<@CHDBEHGGB==>>=<?ADFEBA@@ABBAB???@AA@@??BDGGGABC??A@AJUVMDDDCBFLIa~{kLKKOXPEHGDM|lSHFLGDDDDGD??@>>>CEHPUTUUFA@?FOPQOPMJKKFEGHIIJGGEFONLLNKIGIEEFHLNKNLJMMLKIHJJJIHGFCBABA@??A@@@@@?>@@>????>?@??A@@A?@=?@>@@>?=??=<:9;;99:<<?=>=><>===<<>>>>>=<;;;<<<<<<<:9:::877999:;<=;:;98:=;875567;;;8556765667888;<??=?>>?=>?>>=>?>?@??@@@>?>==::=<;8:<=???==>>><9:;<<;;;<<:;<<?=>>;;;===<;8658===<98<97:;:C??=>CFB;=?BDA=8;=A?CDA@@CA@@@>><<=>@BBAB?=?@AEB;;=??>=??>??@CBBDFCB?AA@><?>=???ABAABDDDEAA>@?@@EEEBCEIHDFGGGEBA@>;>=@CC>AFEC@<>A@@>>@FHFDA?@AAA@@??@@B@@@??ADDEE@AB@>?A@DORIDCECCGKOXtrbNOP[ZLDEDCatiWIKOFCACBDA?@@@>@DDS_]acSEAABLPMMKGDCEEDEEDFJIFHHMROORTPHLKKHCCHNLLNKJNLKJIIJJHGGDBBA@AA?@@>@A?@@>??????@@?@??@@A@???????>>======;8889989<==>=>=;==<=>>=?>==;<<<====<<=;:;;:988:;9:<==;:;9:<<;986678<75654689789899:9<>>=>>@?>===?>@=?@@@?@?>?>>===<>=;78<>@?>><=>?;78;;;<<;;;;;:;>=>=;<;;<;<;9667;>?=98=:7:<<B>?@ABBA<?CBED?:<<AA@E@A@BFB???A=;BB??@AA>>>B@FF;<?@?>@B@>???A??@DB?@AAA?=>>=?@??AAACDDBJCB?AAFGGKIHFEIKFGFCCAAAA>==@?=>>@@B@@=@DAA?>>CFFGDA@AAA?>@@AAA??@??ACBCC@AB@?ACCHSYNCBBDDDISdhMIHTfWEDECOdcRUT^[YOMIDDDCBA@?@A@>?FT]dmmbSKEDEIHHEGCCCAECDDCCHIGGIPURQQRPHIIIHDBHOMJOOKMKLIJIHGHFECCBAAAA@@@?A@@B?@?>??>??@>>?AA@???>?@???@>=>==>==<:76899;=>>?@>=<><=><<;?;:;==<<==<==><<<<;:::<<:;<==<;;:<:<;:97898;867658;<<=><::989;<<<?>?<=<>>>=>?????==>??=<=>?==;77:?>>?=;>==:87:<<<;;;:<=:9<<==<<<><<=:<8559=>@<9<<8:<=A@ACDA?@?@BA@@>;:?CDED@ABDGD??AAB>AC==@ABBABBBDB<>BCAABA>=@B?>@?>?A@>@A@<>A><<??>@ABCDCGNIFCDHJJGKIJGBIKGJGABCA?BDBB@@>>=?@>?>>@CBCB@>AACCCBBBA@ABEDBBA>?@??@B@AA@AB@@CFGLX`UXHCDCCKTo~QGIGacQHGHE\]G@CKSOPXORJFEEA@CAAA@>>E[[foSLNUXVQLQKIIHDADDBBBADHIGGLRWVRPLHILLLLEINNKNOILJKJKHHHHFDB@@B@@AA@@@@@@?@@@>>@@>A>??>??>?@?????@@?>>><@><?=:768<;;:;<>>>===;;;<:8;=;;>;>;=====>=::;<<<<>>;<===<;;<:9<;;:9:99;988769;<<=><;;:;::<<=>?>=>>>>???A?????<>??><=>>?=<86;=>>?=<;<=887:<:::;::<=;:8:===<?>=<=<:97679<=<9:<98:<@BBAD>A?@CDCA?<;=BEDDBA@BADFFABC@@B>;;?CDBACCBABEDCBCED?@?CA==?>=???>@?>=BA?==?==@@BCDBGKKJEFJKJLIFGGHIHILIC@C?>BDCC?<??>???=<<>ECEDB@A@BDDDCCBBDEFGDD?@ABB@@A>??@ABAAEHKQ]g\mODEBCKWs[GHHgVKGIJHcUC?ABKPOZZUIHHF@BCC@A@>??IVvr^LDACL[a^a[YXICBCCDC@BBEGIHHMSVUPJGIKLMJHKPONJPKLJLKJJIIHGDBBBBA@@A??A@?>?A@@>?@?A????@?>@?@>????=;:<>==<=>>?;<9;=>?>===<<<;;:;:==<>><===>=<;>=<>=<;<<=<<><<>>===<<:89<;<;;::9;:::87:;<=>><;;::::;<>>=>=>???>??@@????>=?>?=<??>>=:67==?==<>?=987;;<:::::;::<;9<=??>=><<;;9:747<?;:9<;79;@DCFE?CA?CFEB?<<>CFCB@ACAED?DA@ACBB??<?BEEBBAA>HUQGBACB@BAAA<<>?>>?@@@@=@ECBB?=?>>@BABBFHKJGIKJIJIFFHGFGIKFEF?=AA@BA@?????@A>;<@BDEDCCEB@@EBDEFCDCEIGBACABC@=@=>ABABBCHKPUbnUEDBCK[x^OIJMPJJGGLfKAAAAQUO[`VGADC@ACDCB@@?@AGXRQKCB@AHX]emk^HBACCBCFCIJJDHFJKOOGDFIHGFEFJOPOKOJKKLJIJHIIECDCCB@??@>@@?@@???@?@>?@?A>>@@>@>=>??><968:;;;;<=>==<>>?>?>?=><<<<==<<;>>>?;<>><=>=?;>=<=<<==>>===>><:;;:479<<=<;;;:;;<;98;<==>><;;::::;<=====>>?>??@?????><=@>?><=>??>;67=<<==<;>>977:<99;9;:;;=<<;;=<=>=>=9989<8677<=;7;=<::BCFFHFGEEHE@@=;?ACBCEDDECA<8=@BECB?>CA@DFCAAAAATf\NGDHGDDDAA@====<A>@@@?CFDEE@@>=<>AAF?CGJHHKLMJIIHIIHDDIHFEGB@AA@ABA?ABB@>>?=<?CEDDCDEDDBBCDDEDDEFGDDFDABC?>?@?BB?BBBFNPZgv¢\GDACL_}aXKMPWKHFJL_PAGCC[TM_\PEA@@CCAA@@@A?@@@GJOKFCBA@GLY^\QBDEDCCDEEJNLGFDEHHFB@CBA?@ACJORQLONLKLJJKIIFCDCABA@A??@>>@?@?@??@???@@>>@??><<<>>>;:989:;====>>>?==>@<@>=?><?==<=><<<<==<<=<>==>><<<;><<==>><>===;;<=958;=<=<<<<;;=><:9;<=>>><<;:::;:;=====>>>>>>?>>>>@<<<?>=>=@?==@;76:=<<<;<=:967:;9::9::;>=?>=:<>>??><:;;<;:8679==9:><;<DEFGHHJGHHG?>=>CFA@DGGEEC<769<?BC@?@B@ADJFECABDPVSMIHHDBEGDA@<?A<=>?CBABDFFECC@><79=?B@BBDDDJLKKJIHIHFDDHDCDEEBAA?ABB?DEB><>?><=>CC?BCEFDBCDCDECDFHGBEFB@CC@>?AACB?ECFGIMTf|°¾rIEACMcdYMPS^MGEMMXICLIUVY]aSJDA@BGHDBA@BA@>AACJTLEDAB?@CKRRHBEFEDGHHIHHHGJCDEEHE??<<=?DLQRSQORSPMPNLLIHEDCCBA@??>??>>>?A?>@??@?>?>>???>>=<>==;8<=<<<><=>>>>=<<>===>=>?>>=;>;=><<=<=<<==>=<>==<=<<=;=>>=>==>=>=<<<::;<>>=<<;<:<=<=<;<=>?>><<;:::;:;<<===>>>>>>>>=><<<====>?>><<=@<7499;<;:;?>9779<;;::;;;>@?=?:9===>==;9;==<:8977:::;;>>EHGGGGKHFFFC@<ACHC@AGIGGF>87778:>EEA@@FXbVOHDDJNIIHFECBDDDA@@??@><=?@A??BGEEDIE>:89<?DCA@@@BFJKILOKHIFGIGEEEIJC@A@????AC?<==?>>?>>?ACDGGFDCBABACEFCGAFIECCBB@@AADBAGPQFEKLfz¦^MFBCSuh_WRaeOEHQNQBFQO\mbebZRIBADGJEAABBA??ADGPRHECB@@@A@CDBCBEFGKOMJHEFFDEBD?BDC?>=>?CMPRQPSTRPQQOMJJGCDBBAB@>?>>?>??@???A??A@@??>>>>A??>=9<89>@=>>==>>>=>=<>>==?>>?===>==<;==<;==<=<======<<==;=<==<>=<>>>=>==;;=<;==<;;<;;<=;=;;=<=>?>==<;:::;;;<<===>>>=>?>>>=?<<<==>>=><;=@<8759<<;9:=@=87:<;:;<==?>=??@<899<>>><::<>><;:968998;>=JIIGCDGGDACB>=AAIDAAHKGGE>:87589<BCBCEQhvjaUMIJLEFED@??@@AA@A>?A=;==>>?>AGGEEHD=99;>?BCCEC@?CIHJQ[RKHFGIGFEEFD@@C@???>>A<<????>=><@CCFHHEAA??@BAADEFAGHEBCBCB@ADJGEMQIDHNVpØ²j\HDIUypTRQVomQDLTOJBIV\iwjmdbZNCBEFHCAABBBA>@DKRKEDE@@BCCBDABCBEEFLOLHGGFCBBBA>?AGEB=?ABFMRRORTTRSRNKJIEEBCA?B????>??@?>??>@??@?@??>?????<=<9=<?>>=>=@==>>=>=<?==?????>===>==<=<;;<=<<<==<=<=>=>=<>===>=;==>><<==><=<<<==;;:<<><<<;<>=<=?>>=;<=<<9;<<===>>>>=>>>>>=>=<<<<>>=><;=?<8759;;<;8;?=88::;<;<==??=>@@<<9;<>>><99=>>>><;:99;:8:=PHDCDGFGFAEFA=ADHFCCFLGEFB><9:967;=ADGVrj[YRGFDD@?==>?>A@AB??>=>;>???>DDBEDC;69>;;CDACCBBBCFKVaXDCCGGGFECCA>@B@>>>>>?>?=>?>?<=>?ABCCCA@=>?>@BBFKLGEDE=CEDBDDFMPNMHBFPXcw Ç¡xgMCDOs|iOCBF[lXFLXPDBL\ivqjei_SDCFEFBAABBCCABFLPJEFDDBCCCCACFECFGKNPJIHEDCBB@??>?@DEDB@BCLRSSQTVUTSOJJGDDBBAAA?@@??@@?>???>?>??@????>>??>;=>>>@>>>>=@?<?==><?>?=>>?>=>>>=>=<==;=;==<<===>==>==>=;<>==>>==>=><;=>>?<;<<<<>;;;<<;<<<<=>=<>>?==:==><<===;==?>>?==>>>>=>=<<;<>==><;=><9759;;;:8;><:99:;:;;=??>>??>=<;;?=>>=:7:>=>>>@?<:;;;::PGEFDHHIFDFD?>EIHGDBEIIIFCE@=>;8689>AEQg~jaVIA@?=<>=?>?@@CBB@?>==@CC@>@?@DEC;7:;:;?@?=?CAAAEOZZNCAEHFHHEB??>BCBAA?>BACDA==>?;?>>@?B>A===>@=>BAEOQJCD@AHIECEIIMVKCDCShkgsuNCH\~~~{gMBADNkfKQ[MCCJTgyggqdXEDEDDBBABBDEEEHNNHDEDDCCCCDBBFEDHHNNLIJGDCA@@????@?ACEFECGJNQURTTTWSNKJHEDBBABBA@@??@??A@?@??>>??>@?>??=<<=??>??==>>>>>=?===>>?>>==>?==>==>>===<=;<><<=<>><<==;><;>=<=>=<=>>=<<=?==;;;=<;=<==;<<<=>><>=<?><><>>===><=<====>>=@?>>>>=>=<<:=>==><;==<:759;;:98;>;9899::;<>@?>>??>=;:;?=?=<;77<=>==>?<88:<;:MFDECFHKGBAA?@DFGIHDBCIMHGHA;>?=?@?ABEISewuj_MA><=>@B?A>A=A??<??>>ACB@@?=?CB>8998:9=>>>@AABAH[iZHACFDEJEA@???ADBA?>BEEECA=<@B?>>>@?FB@><>>?@=?>BOPF@BBFMJDDGLLMQDACHjxxrx{sJ?G`xvumbN@@FOghS[XGCDDCPrypsz^GEDDCBBABBEGGGKOLFDDDDDDCCCBBFEFHGTOKHHGEDA?=>?@@AA?ABFJKLLOPRRPTTXROLLHCEBC@@A@@A@??>?@>?@>>>@:=<??>==<;=??>=>=<>>@>??>>?>=??>=>>>====>>==?>===<<<<=<=<<=>===;><<><=======>======<:===<<=<;;==<;=>>=====>>=><==>>=:;;<<==>=>?>>>>=>>===:>>==><;<<<:759:::89;=:8899::;=>?>>>>>><;;;=>?=<<:6:<==;??>:78:;:JEDEBDFJFCCA??@CFDDBA@DGB@CB>AA>@@ACEGHIVY_fikcVI?=@BABB?>??C@B@@???@=>>A@=>@@::<9<ADD?>>=EEFBPmlULILGBLRHB@>?@A?BA?>BCEFCA>>ADA@=?ACLKB>?>>??=><@KMD>BGIKKEEHRQFEBBE]r{xaCAHh|otc]NBBEYaeY_SFCDEKasuwnizcHCDDDCCCBBBGJJJMQJCDDDDFDDDCCBFFGILTNKIHGIC@@??DGIIHFDCEJOMKJMPQPSVVRPMMIBDBD@?@@@?@??>=??????>=<=;==9>>>>??>>>>>>>>>>??><=<==>==>?>>;=>=>=<>;=;<<<=<<<<<=>=>===<>;=><><<<======<;;:9<=<=><:<:=:8;=>==>==>?=;<<<==<=9987;=;:=>>>?>======;<>>==>=;<<=:759:9999;=98889:;<=>>>>>>>=;;;;=>>><>;:8;<=<;>==746:<GEDDABGIFEEB@@ADHHHEBAAB@@AA@BCACEBDCDEJSUTMNSRMGA@CBBB@@>=@BA?@@A@>@<>????@?@???=>GJFA@>AJNFMbwcTXUZLEJME@@@ABBB@A?@ADCCDB?@ABAAA??CMOE><==?A?><>DKFBBDHIIGIQOLBACFLh¥uyt~iPBAEaqlc]OBDKaT_b`PMFFLeusnnaTTKEDEECBCCBBCEHIMPSHADDDDGEEDDCBFFHKQTMKKJIIDBBAAGNPPOMLJLMNNONMNOPRTTSPONJDEBBA@A??@@??>>>>?>???==>:8::<=@>>>>><=>>>>>>=>>=<=>>====>=>>>===<=<>>=====<;<=;<>==>><==>><=?=<=<;===>><::;;<===;<=<=<;===>=>><>>=>=;=<<<;:8648<;:<=>>>=?>>=>;8<=?>=>=99:<:769:9999;<87888:;<=>>>>>>=<;;;<=>>=<=;:8:=<=><=<94679EFDDAAJIHGGCABBEJLMHDCCB@ABA@@@?BFDCA@ADFGJDFGHJBABB@ADA>==@A?>>>?@>?>?BAA@ABCCEECBFGBBC@BKKHRccUYZW]OCEJDCBBCDDDEC???DHFD@@ACEAA@@ABEJHBA>>>?<>A>@GFB@DJMKMNLJFAAAEOev³siTHBABDQtxpf^SGHO`KVlhYXPOjhURPHEFDCDDCCCBBECBEJJRTKCBDDEIFFEDDBFGGLQTLLMLLJEDEDCIMPQPNMOQOKMNPOMLMPSTSSRPKFCDBBB?@@??????>>?>>?>?>>;88:;<=>>>>>>=>??=>?=======>=>>=====<===<><==<=><<=<<=<<;>?>><===><><><=<;===:<;9:<<;;<<;<=;===<>=<=><=>?====<<<<<<8567=:;<<=<?=?@>>>;8:;:<<>=:89;876;:9;<:<<87888:;<=>>=>>==<;<;<=>>=<=;:9;=<<=;<;:5758CBBFCBIJFIJDBECGLPRKEDDB@BCBA?@?BDBAAA@B@AB@EFIJEBA@?AA?=<=@><<=?@B@A?CEBB@ADDDFFBGLHA@A?CJIHMRMQ\TLMMAFKGGGDCBCEEC@?@ADBAA@BAHFIMKMMDCACHFB>=<@B>@>@FEGJTUSIIFC@@BDGKVqtJKBABA?CSz~upg_UHGNXJPhrhweesVJFHHHHNSOIIFEBEFBDHHIRQCBEEDGGGFEECFHGNQTKLONNKGFHFEKMQRRPOQQNKMMNMMJMOQTUUSNIFDDC@A@@@@>??>>>?>?>>>>=>><;;>>?>>?=>@>=>?>=?>===>=<>=>>=>=<==><><<=<===;=<;<<=<=<<>>>=<><=<====>====<7897;?===;:;<=<==<<====;=>>?=><;;==;<<:669>=;<<=<=>>@>>>:9978;===;768775;:;;=:=:88988:<==>==>>=<;;<;==>>=<=<;:<==<<;<;97868A<=?>?FJKJEEEDHINTWNGFDB@CDCA?@@BCA@@@AB@@@@HFB@B@A@?<AA==?A@?@BBACFFDBBA@AAEFHEFBEEDDD@>BEEDEFDIJIDIKBIMJGGFDCDEEABCCA@AABCCACLXUSSXXVIGPKG?=<>?AEEBCGQWSSUJGECABDEDHXozTIIEA@BCCZ{uo_XPGEMUML^tnqrt_OXVWVQOVecXRNJIKJHGFGIJWHFFCEJDFGFDBFGGOYTKMQPQLHHKIGJMRTTRQSQNLMMMLKJLMORRRRLHEDDBA?@A>>=??@?>?>@>>?>>>?><=>??>>>>>>>>=>??=>>==<<=?>====<<===<><><==><><<<<<;<;==<<<==<<;>==<==<<==<688:=>==<<;;;=<;<;=<<<=><>>=<=><==<;88877:<;<:<><><>>??@<8869<==><9787667;=<><<988;89:==<;<=>>=<;;<;==>>=<=<;;===<<:<;99989;777<@FLLHFFGIKKIGNIEEDB@EFD??@@BA@??@BB@@@BEDB@A?@B?>@ECDBDDBA@@?ABBEGECABBBGFDFCADCBGC>BDBABCCDEBFKIDFLJHHGFDGFEBEFFC??@BCBAABHNLLQZ[JHQGE>@B@@CILEGRYVMKJDEDDCFEBBH]|lEGIHB@DCG`zvgVRNHEOZPI[nwxfxYTd`dgRUR_`[TNMLLNMKLKJLLPBCADDFGGEDDFHIQXULNRSSOJKNLIJNSUVTSSQNMMLLKJJKLNPOOOKGDCCBBA@@??=??=<?=@?>=>?@>>?>>>>>>>>???===>?=>==>==>?====>><<>=<<==<==>===<;<;<==<<=<<<>><<=><==:>=;;=:778;<<=><<<;<<;;;==;<<=?=?>><=<<=>;:44658<<<;<<===@>???@;859=;;<=<<=;9756::>>;<:79<9;;<<<;<=>>=<<<=<>>>?=<=<;<==>;;:<;:;;::9768:@JMJIIGEILLPSOGBCBBACEC@B@AB@????CB@@?BBBB@@?@C@?ADDDDCA@AA??CCA@DHGDBBBCCCA?ABHCGD>@BBACBDBBBDJHFFJHHEFGFFGEDECEDCA>BBAABAADDGNSUHGEDA>?@@CBHIIWVPOIFIGCCEEDCDETk¦e?FFKFAAAJkyrgSMKJHO_QI\djyjlhQX`noUaWaie_STQOMKLMS`e_]HFEHOQQOLHFGGJQYWPRTQMJILLKKOSTWXVUTQNNMLKJJJKKMNLLMJFDCBBA@???>?@?=??>>?=?=?>>>>=????>>=>>>?>?><=><;==>?;>>==>===<==<=>====>;;9<<<<=<===<===<===<;<<=><;<=948;<=;=<=;<;<;<<<<<<<=><=>==>;<<==;=86567<;;<<<===>?==><9579;<;<====<;8669:==;<;79:9;<;99:;=?>==<<=<>==@?===<=>>>;:9<<<=<;;96478@KSNQYYKFISdcLEBBC@@@BCBABCDCC@>?EC@@???@B@?>@EBABDEEECA@AA@@?CAAABHHDBCFAA@ABCDDEB@?BCCEBCCBCCBBEDA?=<?CDFDEAAACCCCBDABBAADCGLKLMQRIFCBH@ABDEJVZPHKHHMFAACDABCH\wy}IBDHOE@BBHfv~qdSLIIHHYXKdqpxvu¨[Wlvnbnja__dZepji`WRYwu_aXQQRWVW[WMJKIKW_[TPLIGILMMLMRWSSTRQPNNONLJJJJJJLLIJJIFDCBA@@???>>?><>>>>?>=?>????>>=?>>>=>?=>?>>><==<=>>;>>=><>><><==<<<;>>;;;;<<;=;><=<=<<=>===<<;===<;=<;:6:;<>;=;=<=====<=:=<=>=>==>=;<<<>==>96758:<;::;<==>=:9;77659:=><=>;=<;76479:<==:78::<=:89;;=@@<?=<<==<>@?>==<>==?;:9<>>?==<5559CUXehnvoROcveMGDCDA@BFFEDECECF@>=??>??>=?BA?>BFCBCDFFFCAABBA@?B@A@DHMEBA@@ABCEGFCC@CB@FEEDED@A==CJF?>;9;=?>>@CCEJFDGHHEEDEEFGNSOHGKNKFDEGA=AHNRKVSKFCJMB@?BCBBBLexlOCHP[RB?B@F[`Zahy~lUNKIEKPfZt|z§mWgrihy|mia\XS[^ih\YV\\Xbd]^]YRVTUOJIFK^xlXPNGIOOMMORTUUQLLKJIHJLKKJJKJIKKGGHHEDCA@@????=>?=<=>>>>=<>>?>==>>@?==>>=A??>=>?===>===<<>===<><=:<;<<>=<<<;;<;=><<=;??<>;><=><==<<<==<<;;97<<<=<><><?=>>;==<==>==>=>>=======<=<756;<;96::;=;<=;9976578<<>===><>;::877;<>;679;<:<<:9;;<===>==<>>=<>??>==>==><;7<=@A??=3247Jaknxe^qrSHEDDC@CGGGFECA@EB=;<?@AA?>?AA==DHEDDDGGGCABCBA@?A@A@DEIC@A@@ABCFFGFDAEDCBDFGGECA><HNHA><89:8878@HIJLV_beOHEEHEFHJNOJKLKHEFIG?ANPEDLXSGBIGBC@BEECDQ_gYFFNUYP??AAAHJIIN\rs[JKIFFL[jv`KNV[z¡£`bfah{xpqg\VRLOUWSOJKLL]gaaWPSQLKMLHDI`¢~`ONTTPQRRUVTQMJGFGEGJHJIJJIHFDCDFGEDCA@?????=>?=<==>>==<=>?>==>>?><=>>?>?=>===>>=>>>?==<<=><<>?<<;<==;=;<==;<<===<<<>><<>><=;<=<<<===;;<9:=;<=<<>=<><>=>;==<===<<=>==>=<<;;<==977:<<:7798;=<=><879769<=><==>=>;=><67;::9769;<;;=;99;=>=>=>==>?=>==>>=<>=<===9:<>?@>?4448B\kis}}u{SFEDDBBDFGEDEFA=AA?;<A>@B>==@@><@BCDFFFJICACDCA@?@?A@BCEA?A@@ACDHGHFDBEHFFEFFEBC?;;AFEC?:999988@QVJEPmy~xcWTOHHCENGIIQOOKFGGAFLHDEHPNICBCB@@CCCBGQTOHBGMOQIABBAACEDGJScJHGEGHM[g[JGHN{ndebZexwnh`^[XLSVPMJSRNJQaZOQRTRLIHGHQc~¦¯°¼ÂbOUUSQTRTTRSQLFDEEEEGEEGGDB@@@CBCDBCA??????=>?<<<=>===<<>?>==>>?=<==>?=><<<>=><>>>>=======;<<<=;=><@=;<===>>=<===<<=<<==;?=;===<====;;<9:>;:=<<<:;=<=;>;>><<<>===<=<<;==<<<=>=979<::87678;=<>867:767<===><:<=<=;86898897779;9:=<88;=;>>>><<=>>?=>>>>>>>==;<;9;=@@A@><75<O]aci{uWFEBBBBACCB@BFE>=@B<;<?@??>?=?A=>@AACFFGGB??DDA@???A@@AA?=A@ACDFJIIGEBEHGFEDCDEB;87:@DA>:879:<:>U_NGO_t|rfNDLXXVPOHOOKGGINHCEHJLIC>?ACCBBBACGHIFDBJTUOGBDCAAAFFGJTuhYQMKJKIY^UOIQwj\lbP[onfba^\^[YXRGERTVUWaeX[WUSNLQb ³ÇÁËÒoKSZMOOOQRRQPJDEDEECBCEDBA@??AB@BAAB@@?=;:;AD?<<<=>=<=<;>?>==>>>=<==>?=><<<==><==>>>==>><<<:;:<==<=><<<=<;=<<=====<==<==<:::=<>;;;<=<;;<>><<=<<;;<<=<<==<?=><>><<<<<====<<<==>:6;;;<999;;=;<:667=967<<=>>><==<;677;:877:89787:=;99;;:<=>====>>@>>>=<=>>=<>;879<?@?AOE><CJNV__rrkSFGBB@AC??@=AGE>>AC@<??@>AB@@CA??B@@BDDDC?<<@C????@B???>><BABDEHLKJHDBEIHFEDBBC@;99<@C?>998?BC@E`kVLO`yzcNEMU[__^KIIEEKKPJDGHHGD?=@BDEC@A@BACKBD@MNUMHDBBB@ACEIYnzri^RWLL`k]PNtd_j`JENXZ`fh\NJHINLGHGLOSXaZ[RPQOd³«½êòùúª\THCBHINPOLJFDDEEFEBCDBAAA@@AAAAA@C?A@>;;9>IG?==<;;<=<;>?>==>>><<==>?==<<<==><<=>===<====<<=<<<<<>>:<<;><>===<==<===<<<==;;<<=>99;===;====<>:9<<>>;:<<==<>?==<<=<<<=?;<>=<>=<869;;::<<<>;<::6568666:;==<=>==<9779;<;;87<87678<;:;:::;;=?>===?>?>>>>?>?=<<<:67<>?A@PF@??GHJRV[pujfdooRGEEB@AA<>>;BEG?@BC@=>>?<@ECFCA@A?A@CCCEFA>:<@@>?=>@>>C>?>?ACFFJNMLGCBEJIFECBAA?;:;>?B?>;<?BFHCKl~^QYciqrxz`JCHOX[XYLIEGIJIKIFDCCDC?>?@CC@?ACACFGBDCKKMJGFBAA@ABBKcx}dObyiTUte^hcMCGPNR`qgIBBBOYQHICFGKW[YWTORk{©Ã»ÐòÑhUBCDIPOMMGGFEEEDDCCCBABA@@@@A@@BB>AA@A?=>CLG?>:9<>===?>>>=>?><<==>?==<====><<<>===<===<<<<<;;;<<<<<;;><=<>><=>====<===;<<<==;9;==<==>><>;;8;<>>=99;===<===><<<<<><><>=<=<;<968:99<<<<:99>=86756769;<:=<<9;;8777;>=;76976878:===;9;<:<>>???>?=>>>?>=?==;<::7;?>?@KEB??DEDEKNQSPSTUSKEEFBBC@==<>AACB??A@?<<><<>AEACBACDEEDEGHC?===?>??=?=?A?@??ACDBGGKKDBBEKJFDBA??>;;=>>A??>?BCHLJPhdaUbkd\dk[WwoWNGCFHGIHFGJJIHGJEBCCCBA@ABA??@AB@CFEABCA@ABFBA@ABDBBIRdeq~_gtXM^wVSaZMGILKKYorRDBAQ_UROKMJJTYTROVWWTRSXXQf¥©²vi][ZWTMLLHGGFFEBFCBDCAA@??@@@BAAB@?A@?@A>=AKA?>;=?<<>??=>>@?=<>>=>?=======><;<>===;==<<<<<<;;;<<<<<<====>===<=<<=<<>;<79<=<<<<===<=>;<><98:<<;<<;;=>==<<==><<====>=><<<;;;<846:;::<;989==<:7974:48;;;>;98888:86<>=<:886656:==??;<9;;;<=>>>>>>???>><?>>=:<;;;;?A?IGFFEDCCCFEFJLJHGGD@ADDCEBA;<>ACC@>>@AA?>>=;;>DC@BCEFDIEDBDAA@@>?BB@AB@?@??ABCEDFCHFGD@@AGHGCBA>>=;<=>=@?@ACCEKQRVdaYQZ`[USQJLmyl\I@@@ABCCBDGCABFDABADBABBDB=>@@@ACBA@@@AB@BDBA>DDEECECINT[h{¤¢mdriOR{|TRSXLIHGMOZotZEGGP\X[QKMHFP]]QFKLLWTHKLI]ª¾±¸Àw~~fQKJLIFFEGGFDECDBA@B@@@@@@?@A??@>?@??@?@>?>=<>=>=>?>??>>==>>>>>=<=>>==>=;<>===;=<<<<<<<;;;<<<<<<===<=<<==<<<>=<=><89<===<;<>===><;;989;=>;<:<=?=<<<<======>?>===:==>><<765;<<<;;99;;<=;9877758;==>:79679:98:;<<=<975469;=??><:6;:<<>><==>??@@=>?===<>==99;=>FGICA@B?@DBBGKHGGFC>>DFCBB?:=A@AAB?AA?DCB>?<:>BC@?ABBDFGDB@BCC@>@CBC@A???>@ACEDDFFEEDDA@?DFGFCC@?A>?>>=?@ADDDFMUY[aXRMRVSNLMGIbpg[PF?>=>=>>==?>=?ADDCCEEAA@D?>?@?@AAA@@@?@C@@ADCBEHDDDD@FDFHQh~ivcg}puvWSRbVPLGRPZjkZLNOOPPRLIHFILZXJIJCQK^iim¹µ­s¤sEAJUYOJJKJFDDFGEEFDDCABA@?@?@A@@???>?@?A>@A=@><?;>?===>>?>>==>>>?>>=>=?==<<;<=>===;=<<<<<<<;;<<<=<<<===<=<<=<;;;=<<<<>79>==<<=<==<<;;<;9:=;<>;=;=>=>?=<=<=<<==>?<<=<;=>=><;677<<>;;9::;<;;=:9:7778:;<<7795689;97;<<==<965689<?>?><78;<;<><=<>??@??@>>===>=><8;=>EEDA?>A?@B@?AHGIJIG@ADEEA?=:=A@?AEBB@BDDB@B=:=BBCA?@BADFFBADFD@=?ABC@@>=?@@@@BBDBADCGGFCABDGHGGFD@<?@>=ABCFGEHPZaaXOKIJLJGIIEGX`VKDE@?>>>>>=??>>?BHHHGDDCABCA@>A?@A??@?@@AAAA@BABDBBEDEBDBFBDHtzzx`Q_]VNVUPOQYYUXVOIEKTTWSLNPORVWYCGsUE|Sjni^\UWHDDCIPOKJKJGECDEDFFDBC@A???@?@>BA?@@?AA?@????>=?@?<=>?<=>>><<>>?>=>=>==>>==<<;>><==<==<<<<<<;;<<<=<<<===<<<<=<;;;<<;;<=8:====<==<;;<<<<<<<=<=>==<=>=>=>;><==<===>>===<===><;65:<<=9;:;<;99;><;;:86689:89899889<<::;;=<><76767;>>===9989;=;;?=>?@?>?@>>>==><><:9=>IGCBBAA@?@B?AGIGGHH@BFEIDA>;=?ABDHCADDEDA?B;:?CBCC@@BCDGFABCA?<>=?=>>=;=A@>@@?@BBABCGJIGDGDEIKHHHB@@@=>CGFGHGKPSRMKGDECBBDFECDMPFCCEBA???>>=>>>>@BIMNKDDDDAAD?@A@AA>@@@A@?@@ABA@@AAADDEEHDDCCCSq{fitgU_YQPJHEELU[^XTLLPWZT[Z[\[YX[ZZIF^YJ^VJGHJGHHJGHJIJIPKJLLMJIGEEDCCCBBA@@@>>@@?@?@B@@@?@@?>>>>>>>?>?<====?@>>;@>>>==?>=>======><?=>>==<=;:;<;<<<=<=><<<===<<<<=;;;;;;;;<<9<=<<<;<<;;<<=<;8;=<===?><>?=?<==><;===>==?=<<=>=>?<955;<<;8:::;:89:==<9;:6668:999::89;<;<:8:;>>>87977;>=<<<::9::;:<>=?>@@A??>?@><=>><::=>KIDBBAAA=ACCCGEDGGHACCAFCCA;;=@BEFCBEDBA@@B<<AGEDB?ADFGGDBCA><>@@??<<<;@BAB???AABGHEFGFGGFECIIFIFB@@?=@FJGGFFJJHGCBECDECCCCBABCAABCDCC@@??>==>>?@AFIJFCDEB?BE@CB?B@>@AC@@??ADFCABBCCCCDDEDDDACH[xsWSbf[WXSNIGBAJM^lSXLJNQNLPfhpxqgd`[OGUZUPRGAEEDA>@@DKQRbs\NMNOKIGDDEBAA@@????=>@?>@?@??@???@>??>>???>==>?>=>>??=>?>><?>=>>?>>>=>=><>=>==;><;;<<<<<>=<=<<==>>=<<<<=;;;;;;;;<<:<<<<;:;;;;<;<;:8:<<=>=>>==>=>=<=<====>>=>===<<>>><<8459::;;<;;<;;7:>==997655:;:;99;9:<<:;:8:<>=>87:88;==<;<:89;:9:=====;@>@@@>>?=<>>=<:;=OEA@B?@B@AEGDDHFHEDAA>ACECB<:=>CDCAACDB??@A==@AEDA?>FEFFEB@=;<>ACC@?>>>@AA@>ACDEFHGEBABBCEDGIGHGB@@?@CCIHECCCFECAA@@BDEEDFEFDCBBAACDEEA@@?>=<>>?@@DFFABCEB@AB?CA@EA@A@B??@?EGDGGDCFIGDDEEEECACFSnrse_MMnRIQ]YS\VKLKCAFKNVLRMIOJMMSxp_^VLRWURSJFEDFEBC>AFX]]]_\VTRKHCBBDCAAA@??AA???@>>?@=??=@>=>??>===>=<=?>>?=>==B@?>><?<?==>=>?=<>><=<=><;>;;<<;<<==<=<;>=====<====;;;;;;:;<;;<<<<:9;:;<<;<:99;<<===>>==<=>>==<<=<<======<<<=<<=<8469;;=<;::<=>=<<>=:977579;<<<:;<<<<<=<9:<=;::8888:=>><=;889;;;===<=;>>>>???@>;>=<<98=F@@>BCBCBADEGHFHIEDC?@CCHDE?;<<AEDA@BGECB@?=;<>>A@?BBBABCAA?==?ADDB@???????>ADCDGFBDA?ABDEIJGEGF?@BEGHGFFB@A>B@A@@?>?BCDEGGGCDBCBBA??A@AA??=<>>>??ACB@BDECA@??CB@C@@@@@@>?AHFELKGGGEFDDEFDBA@AEXeUPHBGIkXHFTZUUQILLD@BGMPKHHIJIKKP^hUSVLFILLJFDDBEGGEDEO]]\]b_YVRLHFCBBBBBB@@A@@?@@??@?@>????A>>@?<=><<:<>>>==<;:ARM=<<=>>>=>><===<==<=>===<=<;;<<;;=<;<<==;>?<<=====<<===<:;<;<<<<<98::;<<;;:8:;<<===>>==<<=>===>=;<>===<;<<<><=;=6479;;;=<;<==>>>=><=677677:==>=;=>>===><<<==<;98:9:==><=<989=>=<;;=<=>>>>?<?>>=>=:;;;:A?@CHIIDB@@EHIGIKHEB@ABCIFEC<:<?EB@@@B@EEDAA@>;=BBBAB@@A@?@A?>BBDDCA>???CAABCDBCC@AB?@@BGGGGDEFC@ADHIJFFF?@>=?@??>@ABA?BCCBA@@@BDFDA??>BB@@>?>>>>??@?ACFEDB?>?DB@A@@@@@@>?BGEHKLIIFCB@ACBA@AABGQXTLFCILadIDJbcVJHIMGBCFIKGEEGJKMKIJbyeYPLM[REACBACEDBEHKHEHSc`_d`WWURLJHF@ACBBBBAAA@AA@?@???>?>@@@@A@@==<:<:=?><<==;:BXdXJA??=><>=<=<><=><=<<<<<<<;<<<<<==<<==<<><@=>?<==<<===;:;<=>=<<<98:;<<<;;99;<<<=<=>>==<<=>===>=;<======:=<=;<=;67:9;;;<=<=<<>>==>>;866568:=?>>;<===<=>>=====:87;9=;:<<>;<<8;=>=:9:=>==>>>>>===>=>=;:9?ADGHDGBCB?CEEGFHGD>?CDFGECA;;><@A>=>@?ACEDBCA<;>DDCBDBAA@AA>AECDDC?>@??@@BFFDCCBBAA>A@DEDBEEGG@BECDHHHGCA@>=>?@A@@>EFCA?@???>?AACDDB>?BEEA@>>>=>=@A@?DIFEC>>?DC@????@@@>?DFDGIIGFEB@>@CCDBCCCFHOSNHDGMSjOGMjlbOGNUOHFHGEGGEFJIW`RJJPJKGGJGNZECAABCHHEFIMNMJN^fggeYYWRKGFEA@CBCABBABBA@@>@@@B>??@@@??A@>=:==<?>@>>=?>>==CMVWK=<==><<><=<==>==<><<<<<<<=<====<===>?><>>><==;;<<<<;;;<<<:<;98;==<<;;9:;<<<=<=>>==<<=>===>=<<==<<<<:=<<<<==58<;=;<;<<=<=>=====:5555578>>@=<;<=><<>?=;;<<;988;<:9<=<<?>><;=?;:9;======>>>=>>?>>;97ADFDA>BABC@?@CFEDCB@AACEEHD?>;<<=A>;=?=@@@HGDC>;=?ACDDDFGEED>BBBBBFD?@>?=<?CCCDDAAA>>?AGFGFGGFC@DC@BDEEDA@@A=>@CBA>>?BHGBDC??>?>>>>?@?ABECBA@=<=;;=???DJHGF?<?EEA>???@@@>?CECFGGEDDB@>@BBCBBCEEDGSPGEGJP`k`bmrb`JSYMIPNPSONJIKI`q^OLJKJIKMPNZKA@?ABCEECGJRZUMXgnnd[\[VLCCCA@CCCC@CAAAA@@A@@@@@@??@>>?@?>===>=?@@?=<>@A@@>AFRM?=><==>>==<<>=<;=<<=<=<<=<====>>====>?<?>==;<;;<<;;:::<;8:>:8:==><;857:<=<==<=>>==<<=>=<=>=<<=<<<<;:=<<<<=<58:=><;=<==<=<>>>>=:7465668<=>==:<====>?;998:<:87:;:8;><??>>><<==:979;<>>>?>=<=??>>;9:EEC@@BCAB@AA@>@BBBB@@@?ABDD@==<<=?B><;=>>=@FED@;;@CBBABEHEBB@AA@B@A@?A?A>>=??BFFDDFD@BDGIGHGFAAAH??CBBBA>>@?=>?BBB?A@?DECCDA???<==;>?>CCABBDE?==<<?<>CBEFHG>?BGE?>@??AAA>@BDBEEECCDB@>@BBBBBCCCCDNLJHHILVsumph]TJQHHLIOSMNNKHHOZXNKJIGEFGILPR>@?@@IHJJNOY^VNVfqrlc^[XMDACBAACDBB@A@AA@A@A@@@A@?@?@@A?>;?@><>A????<=@?>??>>@B><===>=>>><===<<<<<=<=;>=<==>=<<<==>=======;=<:<<;;:::<;9<=:9<>>=?<96;:><=<=><>>>==<=>=<=>=<<<<<;<;:=<<=<=<68;==;;<<=><<=====>;8776567:;:>;9>=>><>?=;6668868==::;<<?>>>@>==:99969<>?>??>=>?>><=<:ICBCFJFBC@A@@?>?@@A?=<>@@@BA@@><>@?>=<>>>==?DCA==?C@AAA@BBA@ABBEEBCCCCCB?@@>?AGFCBCCABEFIIIHC??AFA@B?=@C>>?>>>=>@DEABAA@?@A@;?@=>=;=>?DFD@@BBA>=?@@?;?ABFFE@BHHD?>?>?@@@@BDCBDCCBBCB?>@AABBACBBCBIHFFFHIRiqzurheWJGGJKGGKIHLLGIFJONJECBBAAHLKS@?>ACHJJLNQUSPRYgnng^Y[YQG?ABB?BBA@@@AA?AAA@?@@@?>??@?><:<@?<<====><>???@?@??>?=<>=<=<=>=<<;<;<<==<;=;<>=<==<=>>==?><><>=<=;<=;<<<:;;=;<>=:<>=>===;9<<?==<=<><?=;==>?=<=>=<<<;<;<;:=<<===<69;==;;<<==<<====>;=878567568:><:;===;??>=8386767<<9;<;;??>??>>9;:<<89;;<>>?>=<?@<;<<;OFDEIMGBCBABCC@?@?@?=>=@@ABCE@>>????>>=?>=:<BD?>:>?C@A?>?@A?@A?ADDDCC@?@ABCB@=CE@@B@>>@DGHGD??@DGA@B>>CC>>@=>>;=?AA>>?>>=?FFBCDA?<?=>?AC??CD@@@?AABD?=>CFDBBBHGA>?>>A??@ABBA@?AB??CB>>@AAABAAA@@@EECDEGGN_hprm`^VMDIRQJGIQLIKKEEGKLG@CABCCGNOPI@??DKIJFHKMNPZ^ceiid[YWRIB@@B@>@>@@?A@@A@AA@A?==>???=:779=;;:9;<=><>?>?<???==>>??<<<===<<<;<=<;=<<<>:=<====<====>>>====>><=;=<=;<<:<;;=><>>==>==<=<<=>=<;=<>;?9:;=>><<=====<;<;<;:=<=>==;79;=<;;<<==<<===>>;<888567868;<><<;<<;>><=96586786688;;<=>>>>>>=<;<<;99;=;A==<===;9;<<NIHEIPKBBCDCDF@?@>=>?@?@?DBEDAA???=>>=>?>?<;>CAA>>?B??>==>A?>>>??@@??>>=>@AC@B?ECB@>>??AFCA?=?@EB?@B@CC>>=>==>>?==<=>>>>??CIHHEDA<=>@=?????@=AA>>>@BB>?ABGGFDCA@@?>>ABA?@ABB@=?A@@CB?=>?@ABA?@?>>@AABDEEJV^gohXWVMEJQPIFGKPJKFDDGFJDC@CCDFLUPVRC@CKLJIFILIJNV_bike]VUTOHAB@@A@A?=?@B?A?@A>B@><??>>?><:88::;<=>=>>=?>?>>;=>>?==><;==>>=;<<;<<<;;<<==<=<==><=>;>=>?=>==>=<=;<=<=;;;=;;;<>=<>=====<;===>==>><;>=;9<<<==<<=<==::><<;;=<>?><;79;=<;;<<=<<<==>>>;;999677779:;<=;:<>=>=<==666776976889:;>@??>>?>;<;;;7:=>??>===>=:;==HHFBFJF@@ACDAAA@>:=@DHA?>BA@D@B@??@@@>>???<;<@DEC@?@??@=<:>@@>===?@AB@???@BA@DGCBD>>>=@?D???ADEA@?@ACFC<?A=>?A?=:=><=>>=?CEGIHEDD?????@@@AB?>B??@?@ACA??@GMOKDEB@@??A@A@>CGFA@>@A@@A>>?@?DDBAA?=<<>@ACCCFLQ]l`QPVMGLPOHEEJTOVJDCDEEGLCCCDILULVZJEGLOMJGFDFLS]gjnj]YROONIBBCBBBCA>@A@?A?=@A@@@=@?@==>>==<===>=>?>>>>==?=>=>=?>==>=>?=<<<<<<<<<===<<>>>=<=?==:?>=>===>=><<<<==<<;;;==;<=>?=>=<==>=;==<<<>=<<<>;89;==<===><><:;;;;;;<==?<>;8:<=<;;<<=<<<==>>><::::77769::;<=;:<><=>=>;767767:;898887:<>?>==>>=<;<:89;?>>=?9;><:<>CECAJPOC@BBAA=<=;<BDNTGB@@A@@>@A@@BBB>?@?A>;;=@DGEB@ACDD>;=?@@>AB@CEDC@@@AA??AACC@?AAAACGA?DCFE?AEDACGC=>BAA<?A>:?>=;=?<=BDFIHEEEB@?>?>>??BCBC@??@CDDA?ABELPOMIC?@@@BBF@>BGIE@@=@???@BCCCDBEIC>==<=@ABAABCETiYIIVSHMOOGDDHXUaNDBCDDEIBBBCDACJR[RKKMNNLHDGLP\kihfaURNMMOKFCCBABBBA@AA@AB@?@@?@?@=A<====<=>>>?@@?>>>===;>>=>=>==;?===<<<=;=>=<=<<<<<===<<=>===@=@>>?@<>>=<=>><;;<<===<=;>==>;<=>==;<==<<<===>==<;=?>===>>=?=<9;9:;:;====>;8<=;;<;<<=<<<==>>><;;;;7777:;:;;=;;=><====:766789;<<:<9898;9;<<=<=?>=;:::9:<?>>::?>;9=YKCFJU^K@A>@?>;::?CLZ^OECBAAAB?>@?CB@=@@BA@??>;;?BCCCFGHE>::?CA@B@CDC@>@BA@??@>=@@ABEDFEEA@GED??CGGCCD@=>AA?>>??>?<==>>>=A??ADEGEA??>>>?>AFEA@@@?BEEDABA?ETUNNHA@AABFDAA<?BFFB??@ABBBADEEDEIGB<>?<=?@BA@@DDN_RBBVYJONNFCBD\`mSDBCCDDGBBBBBHU`cbWMLMLNLIEFLTgpfeb_WUPNKOLECCBACBC?AB@??@?=??==>>>==?=>===>=>>???====><;>?=>@=><=><<=<>;<;==<==<==<<><<=>>==>=>>>=>=>=>===<;==;;===>>>==>>==;=:><<<=;<<<:=<=>>>>=<>??==>==>;:<;:;99:;<===:7<<;<<<<<>====>?>>=<<<<8678<<::<=<;=><===<:767679:;<:::=;>=<:9=:<>?>?=;:889;>=><9<=<8<w_ZFGOWIEBA@A=;;;A@MVQIEHIECDFC?AA@@=>?>???BA=<:<?CGDEGKOF;:?BB@>DHD@?<>@@C?@@AB@?ABBCDFA=@DC@=BACEDDCC@>???@@>?@=<??>=@?DFACEBDEA??@>>?@@AB>@@@AEBAFGFB?BX`TKEBDCACCA@>>>?@?>=>?BCECBCEEDCDC>=@@A=?AAA@>EEK[UCAT\LIQNFCAA`lxWDABBCBDABBA@Phwti_QNMKLKIGDHNitnlg_[UPMJMKFCECCDCC@B@@A@@==>===<=>@??>?>=?>=?>>><>>;;<>>===>>=;<=<<<<<<<;;<<=<==<==<>>=>=<=><<==>?><@=>=??;>=><==>=<=>====<;<<<<==<=;=<=;><>>?>>>==??<>><>>;:<9:>9:==><=;86;=;<<=<<==<>=?>=@>==>=967:==::==<<>><=<<<9777679:;<:::<;==<978;<>?>=>=9987:;<?=::<<97sfFEJPHDCA@A><=?<AHIEDFFGDAEJFADDAC@>>===;B@=>99>ACDEFHLF><=>>>?CHFA>B>ADC@@@ECA@BEDBDFA<>?>@?A?BBBB?CA@@??@@??>>??AA@@AGKKJFA????=>>>>@?AC@BDFEB@@EFKKCEY_ZLFEGGDB@>?@@??>=?<@?CDEFCBFC@A@?>@A??@>????<BGJQSIGVREDLNGDBA]\EABBAABABB@HWzqfUPMKKJHGHLPfoprkc^WQOLIHEEFCCBBBB@AAB@@?@=>?><?@?>>?>>?=?>>?>>>>==<><<?===??<<<<<<<:=:<;<:<<===>>>=<>>>=<==>===>>>>=>?=<?==<<==>>==>><<====<<=;<;<=><===>>>==><=>>><<=<=<;<<;;=;::<>><<:7:<<<<;;=<>>>>@==?===?>967;?>::>>=<>><=<<;9777679:;<;:;<<==<:89;<==<;<>=:;::<<<=:9;:86µfFBEIFEDBAB@>??>BFFCEG@>@CGJEBDCCE@?><;?>?@A@:=?A?ACDEGD>=<=>>?CEC@@AA?B@@AAGEEDEJJBBFB=>>>AACB@>A??BBA@@??ACB>>@?BDBCCCDFGGD@?>=>>A>>@>@?AEFC@@@BFCGIGHUQMJHNOGEFGFDB???????>>BDGEHGEAA@>>@BB@?B@>@@>>?DHKJP\WDCFDPLGDDKd^BBBAA@@@ABB@O_¤xbWSNJJIGHLPScklnmf`WPOOIFGECBCBBC@B@C@A@A?=>?>>?>>?>>=>=??>>@?<>==>:==<=>>>?=;<=<<>===;<<<<<<=<=>==<?>>===<<====>==<>><>==<<;=<>;@<==<====<=<====<=====:=>>>>><>>=>=<<=<;;:;=<;<;;<<>=;<;7;<<;<=<<==>=>>>?<=>??>947:?>;=====??<=<;:87776799;<;;;<<===:::<<<<::;=<9:::9:=89:9:97½]F@@BEHEBBCB@A@@CDDACB@>@BEID@@CCD@<==<=>C?A@>>?>>>==BA@><>?=<>?@@@CHGCD>?ABDGHEGJGEBFB>>?>=@DEA>AC@DCDF@@?BEEDA???ACDFEBBBA@?>=>??@?>?>=>BEC??@@CGFEEKSSNNOHQMDIKIGGA?@A@?>=>>AFDCGDCAA><ACAB@?@@@@@@?>CIIDENVGDEAHRHEECGEABC@?A@?AABADg »¨_ZUNJIHILPTU`ghjojbXPOOJGGECBCDBBABBBB?A>@=?A??>=??>>=>?>>>?>==<=<=;;?:???>=<>==;=><=<:<<<:>=<<=>===>===>=<;<=>>===<>><=<<=<;=<===>===>?><==<====<<<<=><==>>>;@<>===>=><;;<=<;;9:;<<<<<:859;:<><>>===>?==>=??=??:468=?>;===>?>><==:88876799;<;;;;====;;;<<;:99:<;9::989;7898898¸gKD@@DGFCCDDBCBBDBA?B@@?@BDHCAACCB@>==<@ED???@BA??><<<CD><@@>><==>?CHECCACD@@CECGEDABEDC??>=>CFE@@DA@DGIGB?AB@A@AA@@CCEEC??>>>===>>>@@A@@@@A??@ABEGGEBHRRQZWRRHAMPKBDA@@A@?>>?>?@@A?@A@A<BCBCCAAAA@@AA@AEIHCEFLQLBDBJODCCCB?@@?>@@@ABCCDR±£i]XOJHHLPTXX]chlqmeXPOOKHHECBCCBBABBCD@@A>??A?=>>?>>@@>>>>>><<<=<<=<><;>=?<>=<<;<<=<<;<;;==<;;==>=?>>=<===;<=>>=<=>>>>>><>=><<===>><=<=><<;<;;;;;<<==;<><=>==>>=>=>><<<<;<<<==;9:;<:9;;9459<:>??>>===??>=>>>>>?>8467<>:9?>>>=@=>><988977;:9;<<;;;====<<<=<:989:<;9::878:7898898¢jXKBDDFECCDECBCEEA?>A@@@@ACGDBBCCA@>>>=?CDA?ADCACA?>><=A@?@@?>==<==>>AB@ADFGC@BDGBBCBEGEABA=>BEE@@A??BEFHHFBC<A?@CGEFDFEC??<<>><<>>=>?@AA?>?>?C@CGHHGIMMLOWWTLC?GMJBB@=>?@A@A??>>@?=?@@@?@DACA?@?@@BCBC@DGFEFFEO[MECAJMEEB?@A@>=?@AABBCFOv¬£u]bXNLNPSX][[_insqgYPOOLJIFCBCBBBABBCB@@A>?@A?@>A>>>@>??=>>===>=<><<=><><=;>;==<<;=<;;<<;<<;;<=====>><<=;<=<==>=?>=@=<>=<<<<>=>>===<<<=;;;;=;;=<<<=><<=>>=>>?>====?>=><<<;=><==<;:;<;;;9448<<??>?><?=??>>>?>=??>9567:;78>>>><=>?=;857977;;9:;=;=;>==>>===<97789;:8:977896898899|r{bIFDFEDDGFBBEGGE>=@BAAAABGECCCC@@??@>?BDABACCACBBAB???BCBB@?@@=>@ABDDCBCFHGBACFC@@@@EBDD>=?DFE>?CA@@BEFEDEE@A>?EEIIFEC@?==@@>;>??@??@A@@@>=?A>BFIKIHUOFMOMF?>?CHEB??>A@<BEB?==<AB@ACA@@AB?AA@>??ABAB@ADEHJIGGIV\OEAEJLA?@AB?A?@AC@B@@BU©¤|f]]POURQX^\]`govujZPOPMKJFCBCBBBBBBCA@@A>?@@??>@>>>@?>=>@>>>>===>=<<;<>===><=>=<<==><<=<;<===<<<=><=<<;<<<===>;?<>>>=<<<<<<===><><=;<;>;=:=<;;>===<>=<>=???>>>=>??>>;;;=<>>>=><=<:;:<;8658?=?>>=>?==>??>@?>>?><:8888776;<<<<=>=>;86:;76:<:9;=<<;>=>>?>>><86778:98:8667867888::d_vu]OIECEFGCADEFED><>@C@?BBDFEDDC?@AAA??@DCDBCCACBBAA?>?ACEFDA?@>BHFBABDBCEFDBACECAB?>CDDA><AEFC=>@@B??DDBBCDB>?DF@DGDBCA=>?BA@>?>@ABA>AEED@=?ADHGIJIINNEJKCAA???>=??ACA@?DB@=;>@AB?BCABBCDBA@A@ABDAB?@=ABGIGHIJP\aWIBEFA@B@ACA@ACCAB@??Lk~l[`^VMMRTW]bcgitsj^SNOOMKGDCCBBBBBBBA@@A??@???>@>>>?>>=>???<><<===;===?>======>==<<=<<<=<<;:;<=<<=>>==<<<=><======>>=<===>=<=<<<<===<;<:=<><>==;=>>=<<>====>>>>>>?>>=;9=><>=<><<<;;;<;754:>=??>??=>>>?>=?>>>?>=88;:99867::<;9>=<:758<968:<;9;=;<=?>>?>>?<<8568:98:8556757889::aYjtWMEGFDDFIFBDFFCBA=>AABDEDDCCEHHEBCBC@??DHEBCCACCCAA?>?@BBCCCABCDJJC@@B?BCEFCADFDAAA?CEB?=@CEG??A@@B=?B@AA@AAA>?C@>CC@>>=@@BCB?=>@@>><AFHEBB@CEDEEGIJKGBDGB@B>>=>>?AGFC@?@?==>AA@?>BB@ABCDB@@CGJJGGHFDAACAC@EHHJM`gSBADC?BBBC@AAC??A@?A@B_~{pf]_YMKPVUV^bdjiosn_RNKJMJFEDDCCCCCBBA@@A??@?????>>??>>>>?>><=<<=<<<<==>><;=>=>==<<=;;>;==<;;;==;==?>=<==;<=>=><>=?<>=<==;>=<==<<<<===;;;<>><?:=<=>><=====>=>?>>?>>>=;;;====>==;;<<;;<=857;<<>>@>??>?=?=<>>>>>>:57:;;:<7579<=;<<<986:9979:8:;=<:<=<>??=?>;>966899667766657889:;ia]`cQGHHDDCDECBDCCC?=>AB@@CBBA@?ADHDBABBAAAECCCCBCECAA?>??@?@CEDDEDHHB@A@?FFHECABCBA??BCA@=?BCEC=?A?AA>CE?C>>@AB=<@@@BB?==>BCDC?==?=><>=>ADCBDBAAACEFEHKD?@CC?B?<>>?CFGED??>=>??@@???AABB@AA@AA@HPPOPQRMKEDAEEHPMKIHKORMHHIILNQGBACAAAA@ACGVkcZ[W\WLHNUU[]afkorvp^VPLKPIGFDFDDCBCBB@@@A@?@?????>>?>>?>>>>><=<<=<<<<===<<<=<<>=<<<<<;;:;:;<9:<<=>==<=<<=>===>>==>==<=>><>=<;=<<;<==<=<;<=<=<;<;<>=<>==??=?=>>>??>>>><=;><;==>==>=<<;=<;56:<=??>?>>??>>?=>??=<;8769;<::7677;<;9::78999978:77<==;<=;=>>????>>96657677867767778;<i]Vfvp^MFDGEGD?AACD@@<=@CC?@DCB@==AEC@AAABA>ABFCABBCDBA@>@>=<=BGFFFDGFBABA@FEFCBA@?AECBBBA@>>ACC@?AB@A?CFIGC@A@?@>>>=@B@>>>?CCA@?=@A?A>?=??DEGD@>?@DFDACFD?@BBC@>=>>>ABA@A>ACBCDA@@?>?ACDACDB@AABGJOSTPLPRKIHKFJPNOKEACHTUVYahmtp\JCCABAABIQYVTRPNVYGBIW[[]aejqtqncWSNJPNGFEFCBBEBCC@@@A@?A@??@?>?>>>??>>>=<<<<=<<<<===<<<<<<=<;<>><;9:;;;;<=<=>?>??>==>>;;====>==>=>==><<;==<;<<=====<=>=<;<<=<>=<==;>>=?==<=>?>>><<<==;<>>==>==<===;;66<=>??@@??>>?>>=@?=<:6868<<:8777669;::;979:::87:9699=>;=<9=>>@?>>>?=967645788668966579p\OavZIGKHDB?CDDEAC?>@@C@?CBBBA@@ACBA@B@CB?@GJ@=@@?@A@??=;::BIIIFDEDABCBAFEDAA@?>@DBAAABB@>@DB??AA???BHIKHHD??@@??>ABBA><=AA@>=?CCBECBBEDFEGC>>=@DED@?DFB?@?>==?>>?B>@BA@FGECFC@?@@BCDDCCBBBBBFQPOTUQKKLJHLOGCDKLIEB@ADIOTUIHP]eOAEBA?ABADENTTRUUbMDHW\]`chjlljibZSOLMOJHFFCDBDBCC@AA@@AA@>??@>??>>@@?>==<<<<=<<<<===<<<<<<=;;<==;:9;=<><<==>?><>>>=>>>>>=<>==>>>=>>>;?;=<><=<<>;<=<;<>>;;=<;=>=<==?=>=??===>??====><;<<<<==>===>==;;68=>=?>>>??>??>>>==;8::67:>;;;866799;<;<979;<;79:8769:<;=<;@?>?@@@???=:87:::=<997878659t]Y`pmWOOHAAADCCDAAB?ABC>?ACBDCACAABBB@?DD@AAB>=>??AEA>?=<<<ELFGGDDCACDCBFEB?@??>@CA@@@CA@@BDA>@@@?=?ADFJIJD@@@BA<?AB@?<<>???>=?@?ADBBCCCFFGD@=>@CFDCABEC>><<=<=>=@AAAAACCGFDEFB@CDGCCDDBBEDBBCNNNWXUPJHITZUKA@HJGHCA?@?@CJG@ADQLBCBBAABDFGNRQRMQWSKIRZ\`djkjgc_^YUQNNPMIFEEDCDBCCA@ABABA>?@??==>?>>?==>==<===<<<<===<<<<<<<;;<=<;::;<<=<<<=>>>=?=>=><<;>==><=>>?>>>>====;<><<<=<<;;<==<;==><<<===>==>>><=;>>?>>?9>=<<<====>==><<<;<:77<=>>>==?=>>@?>=:999:968<<8:97758::>=<<88:<><88::7887;;<::=?=>??><=>??;888;?=:5777:676aYbhjt]PICACEDBEBBBA>ABC@@BC@BBEB>>?@B>=ABAB@ABAB@ACCB>?>=><AFCADCBEB@AACGE@>?>>>@B@??DDA@BDDA>??@@>?@@EJIHEAAB@B>=C@@@=;=?>==?==>AA?=?@CEFGF>>@HIIKKEBBBB@=>===>>?BA?@?@BFGEFFCBDCFBBBCBDID@@@ABJNONPMJFg]OIBBLOQUI@@>>?>BHD??J_OGCADGEEGHLPQMGFNSMLV[]^`fflkid_ZXURQSRLGFFDEDCDBBA@BAC@??A@?>=>>???==?<=<=>=<======<<<<<<<;;<<<;::<<<=<<<=====><<<;=<>=>>>==>>>>>=>=<<;;==;<<<==<<:<:;<<=<<<<<=<<===>>=<>=?>?==>=<<=<>=?>>==>==;:9857<<>=?>?===?>=><9:;<=;78;=:987667:><=>=88;;<<:8:;87::;<><:=>=?=??<=?>@<987:><:66759859``epzwdYRKFCBEEECBCA??@ADA?CB>>>E?@?@A@;=BCACCBBBCAA?@A>@@>===CC?@EHFCA@@AC@=>?>>>@A?>CHEA@DFD@>??@A@AAADHGFDBDD@@@<C@AA<<@?><>==<??>>=AEFEDEDB?ANOMOHCBBBEH@CA>====>>?@?>BIJECCCBACECA@BCACA>>?CDGKHDEDCCMRHJLIOIQZGABBAABAAHAALxeMFCFJDCFDHQUQLHKVRTU\abdefloi`^YWWSNPRMHFDEBCBEBC@@BBA@?@A@@>>>>>>@?><<==<><<<==>>>><<<<<<;;<<;;:;<<<<<<<=====><<;;<<===>>>>>??>>==<==:<=;<><<==;=:;9<<=<;;;====<<==>>=??>>>?>=<=;<<>====?<<==>>;8667;9=>?>?==@=<;>;;<>?=:78;>=;:7567;;=@<;88;=>=;79:8999;=?=<>===<=><;>?@<?><:>@=;9667666ninss}sb[XSODAEHGDCCAA@?AA?ABCA<=?@CFDCC<>DDBCDBCCECAA?=>>?>>=;>DA>@EDDDBA@??B@@>@>?BBAHLFAAFHD@>??@BBABBDGFDBDED@@?>@B@@>?>=<<@A>@>=<>@BIHDDFDB@BLMIJFDFDBCHGGB?==:;??@??>=@B@BCCBA@@AA@@@?=>???EIHMLECABCIRWVbQLJIQHBHLJEJPHCDBMx_iWJF@CEBFQUNLMLQRSPU`hknkjiga_]XVSNNPMHFECDEEEC@ABBB??>?@A?>??=<>??>==?<<==<==?=<=><><;<<<;<<;;:;<<<<<<<======<<;;<<======>>>>>?><>;<<<;<<<<<<<;;9::<<<<:<<=><<<=;<=>=??>??>=>??<===<<=;><<<=<<<9568:;<<==>???=====<>>=;;99<<<;76568:;=<>;98;:;<;88;;977:==<<==<<:<<<<;?@??=<9<??>=<97647ovvd`]VOHFJHEAAABDABDA?>AA>>=>AFHAD<@DCDBDEEDDEC?@>=?@?>@;<BG@??ADFDA??@@??@@>?>DCINLDBFFE@>??@DCBCCDEECDFFDAA?@AA@A@@?>=@CACB?><?@FLIEEIGBABFIFCFFEDCCDFJB>==<<>@@?>>=;@BCDDC?>??A>@@>>ACDBJKLSOLHGFDIT[XSGIKHSNDHLHFMSJABEEf}qgGD@ABCBSXPOLITSNONOOU^glkeab^WTROPRMHGFEEDBCBAAB?A@??@@?>?A?>=>??>==>=;=>=<==>=<<==<=<=;<===<99<<<<<<<======<=;;;<======>>>>>>=<=;<<<><<=<;<<:98:;<;9;=<=>=<?>><=<=<=???>>>=>>=>==><>=>>=<=><>9658:9:;;=>??????>?=@==9<:9::=:7667:;;;<::987;=;::888<989:<<;<<<=;78;;:>=>?999:?=@>>?<:86[qnb]Z_TVLDDBBBCAAFC?>?@?=?==@FDE>?CEC@EFGIDCB??@@@AAA@=;?FE?@@@FGB>>?>=>?>>=AFHGCCFHGFEA?AEB@CCEDDDDEFHGDAAAA@@@BBB@?=?BABA@??>?DJHCGKHD@BCCEGHGFEBAA?FC=>><?>??@=>@=>@ABEDA>=>??>AFGEFIJLQOPNLIHGBGMQRMEEFJOIDDFJGKMJABGJXzvwhK@?@ABAP\UUQOYPHLLLKJNZlnhdd`YVSOLPMJGGDDDBCBA@AA@BA>A@B?@@><>@@>>===>==>==>>=<==;====>;<<=<;8:;;=<;==========;;;<==<===>>>>>>=<=<<<<=<;<;;<<9:;;=<::<=<<>===@>>=?=>>?>=>?>??>>===<<>>>?<?>>?=:757::;;<==>>@?@?@?<>><:<=:<<>;768899:<:98;:79;;::987;;::;::::<==<:6689<>===:::====?A?><9O_x¤¸¾£o_UZ[^KBCAECCBA@CA?ACB?>>>=@EGD@CB??A@CEFB@???>@B@?>=>=?FE???BEA>??>>>?<<?BCFKHB>DCDFDCBD>=CCCDBEHHHJIEBBA@>?@CDCA>>?AAA@?>>>@EFC@IOIEDE@@EEEDHE???=AE??==>??AA@AC><=?>AC@?=?FECDC@BBDBEIHIGFDCBDIJMOJHFHLOLFDFFEFIKGAESSdUVVHC@ADDELVXWX[XQFHKKJHJQcojfec_[WQNPOLFEEECBBBA@@@AB@?@A@??>>>>@>><==<<<<=>>>??=<<>><<<=;<<><;9::;><<==>=><;=>>;;;==<<===>>>>=====<<<<=<;;;;;;9:;;<;;<>=<>>>>==>?=?;=>@>=?>??=>>>=>>>>=>?=?>?==<959:==;>>>>>??>?>=;;>9=;<:><==886889:9989<;87;<:<<779:;:<:889<<::85668<=<=<::8:;>=>>===;O[hy¹É®fPKRUWF?@>BDEBA@ACBEFDA<=>=@CEDAB?;AAB@CDDBA@>@CEC@=>A?<DHB?@?@@ADA??>>>??@>BDB@?AADEGDA?><DF?EACGHIKKFABC?=>@DFC@>>?@A@?>=>?AFC@@HMIFEDA>FC@BFE@AB>>CC><===?DDCBB?>>B@>>><>CFD?>?@@@@?CFIFFDGHFJMMJJIIGHJWbOAABAAACB?CMYRF@@A?FIKHEHMMNOJJQHFKJIKKPamljga\`]WUUPMGFCDDBBABAAABBA@@@?>?>=>?>?=<<>=?;>==?=>?=<=><<<=>:;===<::89;<====<===>>?<<>==<<===>>=======<<;<<<;;;;:;9;<;<;;<=<<>==>====>==>>?>?==>>=>>=<<=>?>??==>??@=;8;:;;<?==>?@?>??==?>:<;8<=8<;98;7798789:=<989::<;8689::;;9;9;;8766668;;<==<967:;=>;9:;9M\ehn©Ç«rRLLPONB>?@EDB@BBCBBGHC@BA@?@A????><@AEACBEGE@>BDFEA?ACA>@HE@AA@?AAABCB@AB?@@ABA@?@BCBCCA?<?DG>DD?DFHIGB?AA>;>BBDC????@A?><<=?BCA?AGLJGFC@>DA@BEB?BD@>FGB??>=@EFDFD>?>FDB?DD?@@?@BBCBA@ABBFHFGIGEEMMJLIFDIEY}dBA@@@??B@AFVRGAAAAMNOICDCGDCCDLLHKKKLMOZhdbZXXZWTUVSMIGDECDBBADACA@A@@@???>=>??==><>@;?>==>?=>===<====>;=<=;<;89:;==>=<<=?>>>=<=<<;=;>><>>=====>=<<;<<<;;;:9;:<<;<;;<=<<>==>=====>>A=@>>>><===><=<<?@=<=>>>=>@?>7:<;;<=<==?@@?A?=>@=;<=:9:;<;;99887789;;=::;:99;;8788;=;;:<:=;;:98766979:;<86767:;96987MTX\]n±dQPPONKB=>@GGCBDDEFDEEADDDDA??>>>>??>?A@BDEDB@ABEDDB>>CD@=IPGDCBBADFIHGDB>A@CBBDFEDDEDACD>=@ADB=@@A@CAB@@@?><@HHGEAADBDDA=;<=@CA@@BFKJHGB?>B@@BDA?BEA?EEFC?>=CHHHMLILJKEGKH@>>A@CHCA@?ABBABECBDB>DGHKMMFDKGNhZEAAAACB@>@BQ\JAA@CMMMHC@@GCABBLMJLKKKKMPX]ZY[YROSXURMIFEFDDCCCBBAA?@AAA??>==?@??===?=>;?=>=?>><==;==<==<:=><<:888<=<=<<=>?<=>====<<=?===>><=====<<<;<<<;::88;:=<;<;;<=<<>==>======>@=?=>@;>===<<=<=<=<<=>>>>>>>>98<;<;;;>==>>?@=;??<<=>;9;<=<<:9569:9;;:?::<:899:87889:;;;<;=<<;=:768688988776567875888IJRWYhcWWTPLF@?A@EEBEDBBFEEBCEEFDCA??ABCA??@?=CGEDCDBDDBFD?>AB@=ILHFEDFIMOKIFB@A@?CAAEIIFCGJIJB<=>AHJC=??BEEEEA?=>;@EGIGGJFABA=:99<?@??ACFJKIHA>>@?@CC@@BFC@DECB@?>BFJGEFFHFDAA@=>>>A@EGE@>>ACBA?@?>AABABBFHIHIPKHRLC?@ABEB?@ABIZVGBCALSMHAACBBAAAMOMMJLMLOU^ed`\VRMQUQQLIHFFCBBCCCABAAAA@?@><;=>>?>====?<<>=>>====<=>>=<<=<<=><<:87<;<=:>;>=;;;<<===<;<>==>==;>=<=;<;<<;;;<<:78;;><;<;;<=<<>==>======>?>?=>?;==<<<<==:<>>==>==>>=>>::<9;:;<==?>=??>=:9:<==;:::;;:8666;<;;=:>;;;=::9998988:<<;;:;:<;><9786::86686656676679<V_qohsxijiZTPIE@??AABCCBAEDEEDFDEAFA?BGHKFBBD><@EFDBBABBADE@<=A==B@BEDCDGHIHECAAECA@@AGIJHEFFGH@<=@EKI@=>?EIHGB?=><=>AGGHIJEA@<879;=@A@AFFILORJA>?>>@CB@@BGDADDAAA@?AEGEEEEGEA=>AAA>>@BFIGD>>@DDDA>?BEDCB@ABADKNPME^SCD?AAB>@?@AAL^UCCGNTLJGAWEBADBJSVSMVZ\_[^c`\XTOJLQQRMJGHEEDDDBCBB?@A@BA>>;<=<>>==>=<==<==?===<<=><><?=<;;=>>=:8;<;==;=<=<::;=<<==<=<========<>;<<;<;;<<=<;89:;=<<<<<==<<>==>====>=>?>>=>>;==<<<===;<===>=>>?>>>>;:==;;;;=<;;=???@=899=;99::::86779;;;=?<:<;<;9<9:::::99<<:::;;9;=>=999:;<76565665688;<<g¦¦jYTMI?>?ACA@ACCABFCDFDBCDEBCHIMFDDF?=?CEBBBAABCFDE@<@=;??@DA@@BDIGEFC@ABA?ABIJHIGFCF@==>BFIHB??>CGDB?==><=<?DCEECC><858>BAB@@FKKPSUWMA>>?ACDB@ACHEBCA?@BA@@DEDEEEFE@>@BAA>?ACGHFE>>@BEC@?CAEECA??@>@EIMKD]_HB@BBBA?@?AAAVbQEGLNLJIHWMLFDCETPNLW_^YXX[][YSNKLPPPNIIIEGDEDCDCB??@@@?=<;<===>=>;<===<=>=><<<=>=><<>;<<;====979<<<=<<<;<<8;=;<<=<>==>>=<===;;<<==<<;<<<;<8<<<<<<;<==>>=>>>>>===>=>>>>=>=;=<<<====<<=======>=>?=::;<<><;>=::>@@>A=8:9<>;:;<;:96679;;<<??=<<>;:;;<:;:9;99:;;<=<<;<=>;9:;:<;5755566767;<?®ÅÈ²¬À³°¥±©cTRIA>?@AA@ACDDB?=AIICEFB@@CEIGGGHA>@ADCA@BAADFCBA>=<;@AABACCCCDDEIIC@ABCDFIIIFFFFEC=;=AEFHDDB??BC?<<>?>==>@@@??>;8659?AB@<AFIWb]\WLCC@?@CBB>?@DFCC>=@DBA?BBBEEDED@@BDAA>@@BEGFEB@A=@??CGBGGDA??@@?AEGGEN[HB@@BAB@??@BDQ}nNFIMJGFKXUZSFFGXMEGU[\XVW[`_[VPKMONNOLKIGEFEDCCBBA@@?@?<:<===??=>;>;<==>>>====>>>==:====<<<<<:89;<=<==<>><<<<<==<====<=<<<====<<==<<<;;;;:;;:;<:<::=<>===>?>?=>>?=?>====<;=<;;====<<=======>=>><9:;<>@?=>>=<>???>::;9;?;;==;996768:;===?><<>;9;<<=>;;<::99;=;==<;;;;99988;:<76655787;<?°ÀÇ¾ÄØØÏÅÂ«}^TUJB?>BFFABADFDB>?IJCDDB?@BBDDCAB@@@@B@CABCCEEBAAB?==BBBAADEFFBBBFFFEFDCDGJIHGFGFEA<<<=FFIPLB?=@@<9;>>=>>?>=?=>=;:569=@>@=HNO_mgaVECFEBAA>@@>@CBAC>@BCEC?A@AEDDDDAADDBA?@@ACFFEBBB?@@@CEGGHD@>@?@=?FGDCDFCBAA?@@?A@?CHNXGLLFBDJNV_YXh^[QGJRWWZ`[^a^[WNIOQNMNMKJHFFFEBBBA?@???=;:<<=>>@?=<=<<=<?==<===>==>=;=<==;=><<986:<=<=>====>>=;<<<====;==<<=>><=<=<<=;:;;;::<=<=:<<===><=<=>>>=>?>=>@====<<=<;;====<<<<=====>=>=;9:<<>@>===<;;<<>>8:::<=><=@=885787:<><;==;:<<<;9==<<;;<;:7:<>=<;;;;;86666768665678:599<³²²ÈÔ×ÒÄ¸jZXYKB?>AEFCA@BDBBDDDCBDB>>BDDECCC@ACB>??BCABBABA@BEC>?CC@?@DEFFBA@CBFHJF@BHKIGFGHG@><>><@@BFEDEAA@=:;;<<<>??=>>@B?>69=@>>@AIONXmlfSDCEFEDCAC@?AA?>ACEFFHFB@ABCDDDDBCGDBA??@@BEFECDCB@AACEGGGC@?>>@@AFGCAABDEBAA?>A@A@CGK{ySMLHCFHNT[[kkWVLJGOS[_]\]ZYSKJOROLKJJIHGFFBCCBA>AAA?>=;==>>>?@@=<====<====<=>=;;<=<<<<;=<=;;:8;<====<>><=><==<====<;=;=<=<<>=<=<;<=;<<<<<<>><;=<=>=><==?>>=>>==>>>===<;==<;;>=>=<<<<====<===<:9:<=>@>===<;;<;=>8:;<;<?>>A?;8679:=>>=<:999:::;;<<<;<=<::88=:;;:;:<;:975666555674685768¶¾³¦£¢XOROKIA>?EGCEBAB@CHHA>?BCAADFCBEEEDDCAA<@@EA@AAEC@ACB@?@@?A@?DCBABCFEHHHG?@GHGIGFGF@>@@AA@@?;=ADDBA<988:;=>???@CEHLF;:=C?<?ACHHH[ikPBBBFEECAA@AA@>??GFFFJMCABCCCCBBBBEFCB@?@?ADFEEFDBABBDFHHGCA@?>?@@DECABCBCA@AA?AA@@CDE[¥zQMFBHJRTW]enha]PHEPXY\_Y^XXSJILPPPMLIHHHFEDCCB?=?AA@>=><=>?<>>>=>=<<===<===<>>=<<=<=<<==>>=<;<;<==<>>>=:>><=<;=<=<<;====<==;=<=<==::;<>=<<<<;;;:=><><>===<=?=>?=>=>><;<=<:;;><>=>=<<>==<<==<;99:==?@>==<<;;<;<>9;<;;<>>=>?=967:<=??@=998:;98;<<<;<;;<;9::;;:::99:<::97676666767768877xmu©yjTUURROD?>BEBCCDBCEJIE>?BB@BFFDCEFFFEBCC??@ECA?CIGBADAA=?AAAA??AABCDFHCDECBDCILKDBGF@>?ABDD@<<;>???B@678=;<???@BFEDLPD><<<=AABFBK`lnNAAGGEEBB@>BBA>=AGBHGJOJBECBBAAA?ABAAB????ACFFHHECACCDEHHFCBAA??@@CDB@BBABA@@AA@@@BEFFLVsaKLECGIMSS]\YWZZUJCIMR[]X]XURJILPOOOLJHHHGGGECB?>AAB@=<==>?><=======<=======;;;<<=>==<=><==<;<:;<<<>><><<>==<===<<;<===<<==<<;<>==<:<<<><===<:;<<>===>==>=?<>==>??>>><<==<:9:<<?<==<;>==<<==<;99:==?@>=<<<:;<;<>:<<;;<>>=>>;757:;=?<@=>:::999:<<<<;;<;::;<<<<9:9::::=:8776566767988877oc[XZ|yxm_W^YPMNHA@BB@AACCGFHJIA?CC@DEDFHHEFGEBAA>ABBDBEDEHECE>@?>BDCCCDDCBDFGDCBCBB@CFKJFCGC>@?BDC@<=<>?>==<8567=A@>:;<CQHJOVPB<:=ACAEFHPmneWJNSTGHA?>>>?@??BEGIHLQHHHC@?=>===?==@B@@BEGILLKFCBDEEEIGFCCBA????BCA@BB@AA@@AA@@ABDFILNOJFJECFGNPNPOMTOWXKGTZX\]XXVTTMJNNOQLKJHGIGEGFCA>@@@A>===??>>;<?<>=>===>?><<=<<<=>==>?=<?=;<<<<;;==<=<=>=<>===>=<=<==>><;<>><<====>=<;=<=<<;<;;<;<>==>>=====<?====>=?<===<<;:=>=<<=<<<>=?;=<<;<86;>>?@>=<;<:;<;<>:<<:;<>>===:657:<<><?==999::<:;;<=<;<:9;;<<<<:9::;;9;:8856556668<<::86mSNLTns{rqiXcXKGIGBAAA@@ABBCBCCEB@@?AECBBGIGEDEC@@A@?ACCEHIIHFC?@?@CECC@A@BDDBBCBBCCCBECDGHFE=??A?AA?<>=>?=;<;84444:78669>ADSWdeO@?ACDCCIMRbjb`c^^MCG@>;=;>>@@@CEINQSMLPF@=<<===>=<>?ABCEEHKLLGDCEDFGKLFCDDB@???AB@?BA@@A@AAA@ABBDEHKLMIIIJFBEIUJISXXT]ZMNUYY[ZYXVVTPLMJKKNNJJFGGEECAA?@B?@><=>?=>>;=?=<>?;>=<==<<<<><<>==>==><:;;99<;8<>=>==>==>==?=<<==>=<==<=>>>;>=<<==<<>=<<;;<<<==>?==?=<>?==<?=<=><=?<<<===>=<=<<<><>;>=?;<<;9:78<?>?@><<;<:;<;<>;=;:;<>><=<8557;<<==?=<999::;9;<=<<<;::;::<:999:;;:9:;;875455779<==:96iRNKNWgp_gaRTTJGGFCBA?>ACBBB?@ABBBE@AB@@BBDDEHF@@AB@>@ABFIJIHGAB@@BDE?>??ABEDA@ABABCBAAACDCB@=>@@;==>AB@>?<<996432367778;>CWTfsRMWVMKJKNLQ[_do]PHBA?;?<=?>ABCFHOQLLLHLIDBBAA>@?=>?>ABCCCGILJFEEHMHHJJDB?CB????@A@?B@??AAAAA@ADCEDGJKKHHHHFCEIJLMZ^ZZc_OIOUX\``]WUXUOKJIJKKHHEFIFDBBB@@@??===>=>><<==<>?><>??>==;>=<<<=><>>>><<:668::;;==<<>==>=>=>==<==>>?>><>=<=====;<<::=<=<<<<<;==<=>>>=>=>?===<>>?=>>;;;<>>>?=><;;<<=<<<<<=;;7568<>>>?==;;;::;9:><>::;<>><<;7557;<<<=?=<999::;9;<<;;;:99:8:;9999::9:9:;<<;665578;:=<::7eQMINT`uhZVRJKOLKJGEAB>;AFC@ABBCDEEKJDA>@FGHDBFFACEEA?CA?BHKIHHC=??BDB=A?CBBCDABBAABDCBBDC@==?@B>=:><?@EEB@><7664346<B=9>>?LRYs®vjqjSQTLGEFJQZ\RIC?>>==?<AILMPSMMJFIIGHGDFFD@>?BCEB??ACBDEEIIFDDHLKHGFDBCEB?>A?ABAABA??ABBBA@BECCCFIJIGGHFFDFIKKOVZVUY^SIKX_add\YZ_^SLLKJJKJGEFEGEBBB@A@A@==<>=?>=>=<=======>?==;?<=<<<=<====<<7558<;;;=<=;<>;>=>><><===<<>>=<?==<<<=<;<=;<<;<;<<<:<=<>==>=>>>??==>=<>?<>=;<<;>=>==<=<<:;;;<=;==;<9767;@<<==<<<=;:9:=>==;<:>>><;:6557;=<;=?=;999::;9;<;:;:999:99:989:::99::;=<:7666679>=<;<8aPJHMQZi`UQKHHKHHFEDDA??@FBA?ACACFGJJE@=AGGGBA>@DFEDA@CA?DFJHFIGB@?@A@AAC@@AAC@DB@CDCDB@A@<<=@@==<;?=@BEHFHCC=<67346<E@>A?DMOd³kodQLTPKKGDEKNJD@>@??@>?INOLHIFHFEGJFA@AACD@GSRUTD@BBDDFGDHGFFCBFHFEFFGECB?@ABDDAA@A??@@AA?@CGDACEHIGFEGFGEGJKJQRVSQUZOKLV\_]\VZX][TLLLKKJJHEEEDEDBB@AA>@;<=>=>=<>><<=====>>=<=;><=;;=><>>>=<955679:<==;==;=;=<;===>===<?>=<==<>>>=<;;;<;;;;;;;:;;=><>=<>==>?==><<=>==<<<9;<<>==>>:<<>=<======<=<99679====>>>??=;7;=>=<<<;==>:;97758<><;=?=:9:9::;9;;:9::999::9:989999999:;<<8576578<=;<:<:^OFGJNS]XPLGFFGEECDFECAABDB>?CC@?BFFHC>@DIFGEA?AEDCE?A@@BFGHDDHGE@<?BEJJECD??@?C?B@A?@?@?><>@>>?=;<>@CCCJGHA?A=6753649<>?CLSVax o`WTDFLSOGFFGEBAAA@?AC@CMCAAC@@BABDED?<>?@ELTa`ZTBAILKHGFFGDEGBAFHDEDCEDB@?BA@BFB@@A?@?@A?@AFGD@@BGHFEDGGGFHJKIMNROMQVLNMUZ][ZWZX\ZSMLLMKKKHEDEECDBBCBA??<<=?>?==<==<=?>>>>>===<===;>;><=<=<<867757:;==<=;;<<;;;=<>==<<;;<=<<===<<<;;<<<<:;<<<;;;;=?=<@<>>==>==><===<=>=;:;<<?<<=<:<<==<<<=<>><;:987989=><=>=<=?99<<>>=;;<;<;;;8776:<;;>=?=:9;:::;9;;99:9889::9:989889999:;<;7576789=?;;:<<HDEHKLMQQLGEDCCBBCEHGECCDDA>?BCA?@BDC?=BFGEEGGEEEGGCECCBB@CBBFIIE?@DGGKHA@B@?ADFEC?=>:@>=?@?>>>?=<>?ABACDACADBB9973538<<=AAJQSctZKLDCNWRGHFEA@CCBA?A@CJH????@A?>?@A?>==@KIGMXXMD>DMNJEDDBFBED@CGFDFCBC@?AA@@BCDBACCBABAA@@ACAAA@BFGEDCEGHHIKKIIJNLIKRNQNSW[ZXX[Y[YSOLKLJJIHCCDDCBAABBA=>>==@==<>;>=?=>=?>>@>===<=><>>?;<====<78:778;=<<<;<<=<;;<<=====>;;>=<====<<<=>><<=;;<<<;;<<>>==?=<><>=>==;>>====<;===><<<:;===<;=<=<>?=;7766997:;::<:;<;:9;<>;;::=;9;;97668;<:;>>?=;:<;;;;9;;8898789::89988888999:;<:7577888<=::;=<?>DGEILLKEBBBA@??EGJIGEEFDA??BDABABCA>=@DA@BCEFEDFHGFEEA@?A@DHJG@ADFHCAA@CDBDHIE@@=<>>@@?@??@>>>=>CDBBBA@ADDB?CC=8555;<:<>=DRQTY~iFBFJNQZPECDA?@B@BA?@BDA??@@?A>=;??EDA=AWPDIMKD@?CJLGBDFGGGHFDBFACDDEB@A?@??CECBACAFDAC?A??=B?>?BDGIIFFHKJJJHEEFJIEEOQTORUYZYY[Z[YRQLKKJIHFAADKLGBABA@?===>?==>===??=>=???><<;;<;=><=>;===>==77889;===<<<==>>=<<<<<<===<;>==;=<<<==<==<==;;;:::<=====<<><><>?=<=<===<=<======<<=<;====<<=<=<<::9666898999;<8:=:699;<>;>;>877997789989;>?=><;=;;;;::;979878:;989988778999:;;97588898;<99;;:>>BCAJJKJC@B?@@ADKNMKIGHGC@??ADCDBBB?=>ABAABBCCCCEIIDEE@>>BAGFC@@FILLFEECEGDFIGB?><=@?A??>;>?>>?<?GHECA?@BBCCACDA<;=;;=:====FIIJ^FDIMHDIKGEFDA@AACC@BEC?@A?>??A?>?BDH@=>?CFBBABCCBCECBBEGHIKHFAEBEGED>?=>>?@DGGB@CDDEBB??@>@B>>>CDGHGDFGIFACDCBBFFDDLYWPQSX[ZZ\[ZXTQMJJIHGD@@ERUPBABA@?==>>>>=??>>><>><>?=:=<::<=<=>=====?==<6899:<==<;==<=><;;<<<===>==;?>=<<=<:<><<>==<<;;;<<<=>>=<><>===><>=>=>=?=;<=<=<?=<====;;;<<==>=<<7765659979====;:9899;;<<;<==87978867:879<>??>>=<<;:;;9;98888899889988777999:;:86588998::99:99>=>?>IGMIDCC@DHIKPROMLLKGB@@?AEGECBA=<>@AABCBBBBDEHHDEGB??@?B@=AJIIMOHEEEDHFFDA==?<>EFC?>=<>>?>=<AEEB@A=ABBC?<>?@>?C;<>;>=>@IECHxdNEJKJEDEEIIGC@@ACECENFFABB@=>AA@??@FHB?;?@B@?A@@?>AC@?@ACGJIGDABEGFFD?><>>A@AEEA@DFDDDB@@A??????AAECEHDBCFCBCDCCEDEEGV^TVWWWZ\]\ZXVQMJIIGFB?>EZ^YCABA@?=>>=>>=?>>??<??==>9;=<<<;=>=====<=??=:57:8;===;=<>><=<==:<>===<>=<?>><=<==<<=;=;=;;;:<<;====<=><?=??==>>=?>;<;:<<;=:=<=<<=::;:;<;;>=>=9676557789=>>;:989:;=;<<:=<>:97997659:8;<>?>??>==<::;:8897:98987898987779:9;<976589:989988978B<<=>EFLKIIIFJMLJMNNMMKID??>@@BFEDCA<;???ACCBAABEFHHEFFB??@@??CJKEGFIECCFGEEGBCCBDBCKJCAA=>?@F@>?BCCC?>?EDBB>>A??>??;=@??@CAFEAJm_ZMCFOONJDCCFGGEBCDCEGHLHHDDDB><=@=@?>BC@>:=A@A@B@@>??CA>?>>?DDEFEFFFDEFCA=CBBCCEEBBCEEEDCAA@??=?>>ADBABHCCIHAA@EFFCCEDEOVOOMORZ\]\[YVSNJHIGEA>=FagOCBBA@?>>>=>>=?>>>><>>==?<;>><=<<>====<====;957;;:;===:=<====><><>>==<<==>=<=?@=>=<>;=;<<<;;<;<>>==<===>=><>@>==?<<<:<;<<;==<<;<<;9;;<=<=>===:7655667;;:=<977;<<<<<=>;<==;978;877:9:<<=>>?>==>=;<:8:9:9;;:867778:78777878:97669:;988777767A@<?CEGKKNMNLMLMLKKOLHHGB???>BACF@C@==>@>ADDB@@AFGGHEFEB@@@BA@DJJDEDDDDEEIICD?EHINIHKKFD@=?AADA>ABBB@@BDHHFDCBAC@?=<;>BA?@AEGDCDQIGD>AJKJEA@AAADEEEGFFGFFECCDBDB=<??AA=>>?=>?@BB?AABA@=BC@BABA@@ABBCBCBA@@?BEDDEAFCFDBFGGFCBA@??@@>>BFECAEAAILABEDHGGFGGENTMOLMU[]][XVSSNNKKLGB=<GiqECBBA@?>>>=>>=??>>><>===><;=>==<<<=;=<=<<=<;9669==<<<=;;<>?>=<==>?<<<<<<==<<====;<>;<=;<<;<9;<>===>>=====>==>?==>>>;;<;<>:<;<<==;;:;;<===??=<978877997;;::659<:<<=>>>=<<<;878:77889;==>>>><;===;:;:;;;:;:;87687887779776788766679988677556A?;?FFHOOONLKKFHMMMLFFEEB@B@?CCDFA??@?>@?ABAAB@AHHGHFEDB@@@DCAEKIDDCCCCCDGGECDEEKQKJIHCA>=>CCCA>ABAA?>??FICEC@=>=@@;<=@BA@BDFDBDDBBD@>B@>C@A@BBECEFGJJHGD@ACDC@E@>>@>A??=??>>ACBB@@BAA>?AACBGAB>>???CCA@?>@AABB@BFFIFDFIHEDC@>?@BD@=ADFEAEBAEJCBEBJNLLIGFNZ]Xahbeilkg[TUOQQPNKFA>D[fJACCBA@?>>=>>=??>>>===<==<<=>==<<<=;=>?<<<>;8658<<<=<<:;===>=:>;>>::<==;==<<<==<<;<<<<:<<;;:;=<=<>=<<====>>>>>==>=<<;<;<;===><===<:<<===>==><879988:9<:;:958:;;;<><;<;:;<:877887898;>>>>?=?<>=<=><<<;:::977767:89688979<977756546665466565A=;?HKJKLNPKKLE@EKLLEEDAB@AA@BABD@?A??>@BBDCCDCAEGFEDCCBAAAFDBFKHCBBDCBBCFECDDDDIMJHKJC>>=@IGGC@BBA?<?==ADA@?=9;;>?><;=CCBB?BCBD@?DEB>B@@BA>@BDICDEGHFFOHA??BBBA=<;<<=<?>=@A=?ACCB@BA@=>??ACC@@>>==B@ABAA?<>@BCCDEGHHEGGGFAC@@@@@A?>?@CB@DEDEFCABBGJJMJEEJ^lupzucXVVVSRWRLJIF`wNCCDC@@@@>=>?>@?>>>==<<>=<<=>==<<<=;=>><<<=:8653;;<=<=<;;;=<><;=><9=<<=<<=<<;:;:9:<===;:=<;<<><<<;<======>>>>>===>><=<;<=;==<==<;<=<=<:=====<97;;::99<;;;;:<;?<;<<:;8=;=;877777788:;=>=>>>>@?>=<=>=><:879877667978988:79986756556644676664@A=>HLGFHLOLHIFC@GGHFFB?A@=?A@?@CCBBB@>?ADFFBCDDAAEC@A@CB?AGFDHLHCACECA@BDCEFEDDGIFGHGB>?BEPIDBABBC?<<=<=@@???:>;<>?<;=AEBA?@ABC??CC?>AAAC?=BADHDDFDCACPIB@>>???<<<<=>??@@BB;>?BABAB??B@@@CB@@@AB@@CBEEC@?>@@ACCCCCCEFIFCE@AABDCBA?@@?A@@CCELIABDEFEHDGEDLZnÎû¸{sa_a^^YTQKE;@NTDCCABA@@==>>>@>?>>>=<=><<==>==<<<=<===<<<<:76539:;<===<<===><<<<;:===>=<<<;=;9::<<<<;:<<<<<;<<<<<>=<=>>>=?>=>===<<:;;;==<=<=<<><=<;=<<=<==<;98<?:9;:>;;9;<<==:;<<;;9<>A<:97677777;>=<>?;>>@>===>=>><<;9;:988768999:::77976665767765775563GF?=BFHHHIIFDFFFCCBDECAADA<>C?@ACBAAA?>>?AAA@BDECAEHD@>C=>BEC@?BCDEFFC@?ACEHGECCEEFGFDA?@CDKFCBABCEC>==;;>>?@><<;:;<?:>@CB@B@CBDC@@@>>?AB?>>A?AEFHHCB?BIGAA=>@?>>>??@@?@AABA=?AAACB@?GG?@BDB?BAACBBDDCECB?A>>?A@BCB?@CEEBAAACBCEHNFCEBDDDCCA@@ADFIIHMSVWPSWzÐô²ts|nXSONOKID?>I\BDDBABAA>>>=>?>?>=<<>=?<=>=>==<<<=<=<<<<<<987538:;;<==<<<=>?>==;9:<<=<=<<><<8<=<<<;88;<;<<;<<=>=>=>>===>?======<=<<;;<<===<<=>=<=<:;===>=;;:9:;;::;<==<::<9<;;;;;9=:;?A;987568878;?>=>>>>>>=<=<><=;<=:<;<9::879:9:;<=97866856455567654565GD@?@@HHHGECDDEFCBDABDDADC;?ABBBACD@@AA?@??@ACDEGJDECCBB??ADCE?@BCEGFA@BAEJKIFCCDDEFDA@?ACCGDCBBCDDC@@?>>>AA?=<;<:;<<=>@@ABBCEAABBB@>>@@?==??=>ACCBA@>@EM?ABB@>=AA??@AA@??@A?>?@ABBB=DD?=ADDBA?@A@ABABGE??@==>ADAAA?>BFEBBBDEC@CENMGD@EDDACC@CCJNKLUhokia^Xl}ºÈË²yLJLKLLJD>=Did?EC@AC@@??>>>=>>?===>>><<>?>==<<=>=<;;<<<;9:86479:;<==<<<=>>=<<:9:<=;=>;<><::;<;;;89;;<<<<<>>=>=>>===>>?==?=>==<==<;:<<=====>>>==<=9>;<:<<:7:9;=<9;==<<::98;=9<9:8;<>>=:9977889799<>??>??>=<<<>=<<<;<:;:<:;::989:::;=?=:66657456667645766DBAAA?DHEDACCBCDAAD@?DC@B@=BCCCEABE>BADABABCCDBBDILGDCAECDDGGFA=?>EHD?@BACIJE@?AEEEFB>?@ACBCBCBCCBCCBCBA@>AB@>===<;<=>??@BBCDEC@ADFDA@>>==<@?<@A???A??CHN@AFDB=?=@>??B?A?=?BA>>>@?ABAAC>?>CEEECBBA@@A@DB>>>>=??CA@A??BBBAACED@?BFKLFAC@DCJFEFJIRQLMXluuwxoekt§²ÑÚÜåàÉuPJHIKKE@@>BOT@DAABA@@>??>><>>==>==>=<<==><><====<;;==<;;;96469:<<==<<<====<;9:;<<:==<=><9:=;;;9::;==<;<<==?>==>>????>?<=>?==<=;<<:;<=<==<=>=;<<;;=<<==>97:;<<>:9;=;98999<<<:;87;=<@;;78978997778>>??=<==<<<=>==<<>:;=<:999888;:8;==<867759867865665676????DCBDC@BA?@@@?AAABAAAAAACAAFIBC@@?@CCA?BCGFCBBDFCB@AGFDFGFC>>@BHFECA@@@DFDCBBBBBDB?CCBCA?@CCBAABCDFECA>BDA??>=<;=>>>>BHHEABDBCKIBA==>>:>@>=@??@@@@ACHODCGFD?=A>?=@ACA>=>?A?<=?AA>=???B=@EEFBDEECB>AA@?@==>=>@A@?A@BBCCCBCBB@EFKLGBBBBCLHIIJLPQNQU¿oo«ÞáäÊ²¢ubRKKKIJKFBDCACDBCB@A@@>>=<>@=?=?==<<>=<>>==<==<=;<;<;=<==>=:7559:<<==<<<===<<;9;<<<:=<=>=<9:<;;<;<=;=:<;;<><==>=>?>?>>><=><>>=<>::;;<=<?<<=<===<<<;;;=<::99;;==?;:8;87767;>=<<<::<>=:;:6:898999778=>==<;;:;<==<>=;<:8:<<;8999:8==;;==;766677877876476564=>?@@?@?>;A=?ADA@BABBBDDBBDDABFFEDA>>@AAAA>@CEFEDC@@@?CIIHHGE@=ADDIEEAADCACED@?A??CC?=BBBCA>@A?>?@BDGIFD@>BEBA@>>=<>?>??AFHECCCDEKE?A>@?=<;?>>??A?>AABCFJJFEFD@?A@>=@@FCA@=@>===>@A?=<?@@=@DFFAACBC?@@A???>@@?>?AA>ACCCACBCBAC@BCJKD@@CCCEILKJHHONMO¤×ptli£ÚÐ¶pZ`VKKJKKIIHJIJGDBBBBBA@??@>?=>@>>==?>=<===<<>><<<<;<<<<=<===>=<97458;=<==<<<<=<<<::;<=;:==>=<<:;<<<<;;=;=::;<=<=>=>==>>?>?>==>>>>==<;;<=<=>?;=><<=;<<==;;==;98:=>?>===9:77668=>>=;;===?=9:9:;86:79868:;<<=>;:;9=<>=<<;;:9::<;9::9::<=<;;:9767776775665565756ACEE?;><;;@@AAC@CEEHEEFCBCEECCFC@D@==@A@BA@@@EFEB=A@@?CHIIHFB@?BFDEECDGEBCBAC@BDA?AA><>ABCA><?@=?==>@EIE@?CGCA@>?=<??@AA@EIEEDECCHC?@@A@@<<=?>?>?=?@B@BCOUPIEB?BC???AFCDDFA@====>>>@?<<>?AACCAABAAAA<A>B@?=?>?@@BAAAABA@@?AA?B@BDCEFDDDEGIJJGCFGMNKKy¢qb][W\_qjOLSPGJJJGFHIHIEHFFDDDB@@???>??>?<==<@<?<====>>=<;;<>><<=>=><<=<<;8456;==<==<<<=<<<:;<<=;:=>==;<;;<<<<;;=<=:;;;=<======?>>>?>=?>>>>==><=>===A><?<=<===;==;=;:;98;=>>?=>=:978788:;:===>=>?:898:988;6776:;==<?<<;9;;===<;<:99:;;<;:899;<=<<=;:866678876555565766GIKLB;:=>@DFBAB@EIIIDFF@@CBFFCCA>?><<ACBBBBBCEBA<ACDBABFJGDCCDEEEEDDEDCA?AABE@<BA@@>=>>@BA@A><><A>><>?FEBACFFB@?@>=@ABDB?DIGGFFBAEB@@@???<<===>?@C?AEBHQOKLLICCDA@@?@FDBCFEB>>>=>C??=<<@@BCBB@@ABBA@>@ABA??@?@??@BBAABA@BCCA?@?ADBGNLFBKOKGHEGHIMKFFLSSOPKJOWWWPGFJNLHJKJGIIMIHHLLGFCCBA@??????@?>>>=?;;==><>>>><<;<<<<<=<>=<=<=<:9674<<<=<=<:<<<==<===>;:>===:<<<<<;<;:===;;;;=====<==>=>>>?=>>?>>=<=?=======<>=<=>=<;==;><;<:8<>>=;<=;9:797897:9<9=<:>=:778987899567:;8><=:><:>=>?>?==<:::<<;;99:::::9:<<8756676789666666655HINKA;7=EGLJGDBDGHHFBAE??@?DFEAAA@A?>ACBBBCFE@>AABHGEFCIJIAAIFBABFFDDC@?>AACGC=@ABA@>==@CBA?=>?=>>;=>@AFFCBCECA?@?>CEDGD?CJIIGFA?B@???>>>====>>?@BADGFVLBCDFNHDCC@?@==AABCCCB?>=>EB?>=9>ABACBBCBBA?=<???A?ABBC?==@B??@@@B@AEDB@@ACFHEFBEFIHHEIJHFEBEEIOOPNKQWQXSIEHJGHLLKKKLMKKIJJIHBDB@A@???@>>?>==<><==>==;><=<=9<<=<<=;=><=<==:8:66:<<=<=<<;;<=<<>>=<:;?;==:===<<;<;:===;<;;>>==<<====>>=>==>>>>===>=<==<<=<<==><?:=<><>><;88;=;<;;:8:98879;899;7;;==99;888779:75789;=>==<>>;<=?@>=;999:;<><;::;;:9878887758656778665666657FJGA;99>DGDHHGDCBCEEAADA@B@BFF?ABA@C=?A@ACFFA>BEECFLLHHDLI@?FFEFEFCABAA?ABBDG?>@@CGCBB?BABAA??A?=><=@ABGFHEBDFC@><<BACDB>AILLIF@>@?>>>=====>@?>?AACFHGSKDCCIORKGAAAA?>>??>>BBADA@CDCBE?;DEBDCCDCA@><<=??@AB@CB>==>?A>>=???@BEECACBAA@DAELIJHGJPNHECNMGOXYWTRQOXVKCGJEFIJLKLLKKKGFJHEDCBBB@>=>???>==<;=>=>>><=;<<<=;===<<<==<<=>=<;896569<<><==;9;;;<=>==;<=<=<:>>;><;<;:===;=;;>>=<<<====>>=>==>>=>===><<=>>=====>=;;<;==<=<;<99:;:;=;87998979<878799=>:88:9768:997689;=?=<>>=====>>;<89889::;<:999<;87:9787758568675666766676CE@=789>CDCCEBCA@DDCBBBBCBABDC<?@AB@?@A@@DFD@@CDB?BGJGFEIF@=?BEEEC??>=?CDDDDA=@ABDEJCB@A@???>@A@=>?=?BCDDHFBBDB?==<>BFD?=?EHIGD@>@?>>=<<=>?@A@>?BCEHJHPJFCCINTMHAABDBA@=>=>?@?@@?@DEBD@:BC@??BCA@?>=>@AA?>@@B@?>??>?A?<<>?@@ACBA@?==@CDFHBGIHLZSMNIQWPPRORY^ZUVUMCFIECEJJJHHGIIGFFD@CBA?@?@=?@@<=<>:;<=>>===;=<;<=<<<?;><;=<=<<<<;:97447;;<<=<<<:<<:<==>=<===;<=<<<<;;;<===<>;;?>=<<<====>>=======>===><<===<<<<=>>=<<<<===;>=;9;;::=;6798:978;:7888:=;:99:977889968:;==<;;=<=;<==<:;99678888799888999:::687875677875568765655DB<6466<?BCBCBCD@DEDDCDFFAADB?=>??@DABCBB>BC@ABAAB@@CECABA?@CFEEC@>>??BHEBB@@><AEFCBDB@A@@@>=@CB@===>?AGIFC@BB???;>ADF?=AECCEEA?=>>>>==;=BECCA>@CEGLKIMIFCCINWOJAABCA@?>?>==>=<=>?ACD@@:>>><@D>@=>AB@@A@?>?ABA@???=???><>DA>??>>?==>ADDBEBCJMOUUSOT]aZRILKU[]TNNNJGGGBDGGGFHGKNMGB@@BBA@@?A??>?<==>9<>=>>>==>===<<<;==<=<:<<;<;;=<::86658<<=>====;=;<=?>=<?==<<==<;;;<<=<==<=<=<==<<<====>>=======>==>=<<===<<<<====<<<<<><<<=98;9;9:;76868::99::978;;9::;::988;8:79:<==;:<==<;<<<;;::777889<:<998889;:98677675677747777757454EA943456<CCAFKGFJILLJIHDBADGHD?>???EFHECA>?@@ACDA?@?ACBCA>?CJNFFF=@>C@AFB>>???=AFHEABFFA@@=<ACFA<?>===@FFD@?ACA>><?BAA>@BBABGHA=<<<=>?@>>DFDAABCCAIQMKKIFCCEMZQJAABCA@>?@?===<<=>?>@@>>>>?<<AC???ABDB?B?>>=?A@??=>?<>?@>BB?@><=<<=<>ADBBB?CLPQUVLNXhcUOIFJQOZTOPQMHEDBAEGFFIKTQNHEB?BDABB@@@?===>=<;===??=>>======;<===<>9=<;:;;?<;:68857;;;=<;;;9:;;?=@>===;;<=<<<<;<<<<<<;;==<==;==>?>=>>=======>==>=;<=<=;;<<<=<=<<<<<><<<=;996:8;;68869<;=<;;:9:::9:9::::9:88898:=>=<;==<<;:;;<=:96799::=::9::99;<876776776666756775756855C@9444579@?<BJIKLSYZ\UHCCEGIJGC??@@CFGDA@A?=@CAD@?@@ADEDBAFINPGADCA?EDCA@>>ABD@?BCDABHFBAA==@FC@;A>>=>>CGIABCCB?>>@A?>=?B>?DJEB>>=<=>@BA@DC??@BCCBLXKHHGFDCBM]TJAACC@??AA@===<=>??=?>>>>>>;;=??>ADBEAB@><?<<>>>>==;<>>>?>?@==>>;==>?@?A@D@CKMRZUMQW\YPOPNGHJ]]ULNNIGCBBCFHJIKSTMHDBBADBAA@@@?<;<><::==><?=>><;<==<<<<>=<=;:;;;<==>;=9::76:<<<<::856:=>>===<<::<=;=<;;=<;<;;;<<@<<<>=>>>==?>;===>=>?>>?=;<<<=;;<;<<;==<<<<><<<=;99688::99;79===>:<:::999888669:<989:8<=?>=<<<<=<==<==:8899;;:999::;:8;9:87767767775665476556656@I@865548>?>BEFGQbjkueOEELKIGBB@CDCBBBBDGDA@?BA<?>?CECCABILLMMB@CB@?EEDB@@BFDHB@?AGCAFFCB@>>BDA?=D?<>@EAFFDBDBBBB?@@>>=<>:>DKHEA>=>>>BBA@B@?AABBBGSRDFFFECACGKIFBADC@?@BB?====>?@?=>=>>>>>;<=?>@BECGIEB?=>>=@>==<>;;>>=>?=?>><=<>>><?@<>?@BKNKRSNPTVWZRQOLQUjcVOONLKECACFHIHHNSNGCBA@CB@A?=?>=;=<:9;<<=<>=?<><>>=;:<=<<<;;;;<====<<<;;<:66;<<=<;;979==>??=;;::=;=<;;;<;<;;;<<<==<===><><?<><>=>><??>>>=;=<<=;;<;<<:==<<<<><<==;99679:999;89<<<=:9;88:9878:97:<<:9879;<=@=:====;><>>=989;<<::978;9:99:::87868787787666678655765>QLA;8737;>@EFGLXjuzoVINUVLFDEEEEC@@CBDEDBA@>?>?>@BB@?AEJNLMKBAC@@?CC?>A@BBACCC?AHJFFFAC@>?@A@><DAB>ALF@C>ADA?A?>?@@><==<=?EE@;;>@?@DBCAAB@B??ABLSKDDDECA@CCCGG>@B@@CDDD?===>?@@?===>>>>><==?>?@BBEGC@>===@@@>==<=<<>>>??>?@<>?=>==?=>;CC@MPOORPPXZ^ZRQYacfdcYRSNQPFBACDEGHFKPMHECBA@@@@?===;9<;;9;:<=><<=<<;><=;<=<=<;;<<;<=<<>=<=;<<:779<=>><<;;9:;=><:9::<=<<<<=;:;<;::<===>=>?>>>><?;>===?>>=>=>><<=;<;<<<;=<:>=<<<<><===;9967::98:;9:;<<<:9:8877:889:9<=988798:=>>=>=><==<=?><87:<<;::89;::;::9::77767677898666778667656>OTEC>:8;>@CDDGOQ]s~}oYIJQQJGGGGDABBGCBBABBABACECB?@@ACFGGLLJFCBCBBBD@<=>=AEGBBB>>DJGEE?B@??BA=;;AFF@@KKGB>BF@>>????A>><<>=>?@C>?A@@D@CBACDBB@>BCOLDCDEEEC@A@AED>@@=>BBDB>==>?@AA?===>>>>>==>?=??@ACEB?===>@@@>=>?<=<>>AA@@??=>A??>>@=??BCAPPPOWWRVYYY^[_jgbch]PONRSFA?BBEHFGIIKHFCAAA@@@@>A=<<==?<=;<<=:>==<<<<=;;<<<<<<===<<<==<<=:<=<958;>>=<=;;99;=><:99;<><<<;<:<;;<9:;;==>?>===?>=>>>==>=>?>=>>=<><;<<<<;;<<=<=<===>====;9968::88;;:;;;;<:::8987:8889:<<78;998<?<;<<=>><<<===;899;;:9:::<;;:;;9;:98758796989866677755765AKPLID@>9>FHFEHKMRhsoj[LHIKIHFFEEABDGFACCAACCDFGDB??BCDFGEIIGDCDAACB@A<@@=@EGDAA?@EJDFE?C?CBC?<<>ADA=?GJJI?AHA@=>@B@DD?==>>===>>BB@AAADDBCBA@>?BFOEDBCDFHFBAABCB@?><=>@A>>=?@@=?A@?>>????>>>>?===>?ACA>===?@@@?=>><=<>@AB@BB@><=>?>?@>?@CFALPVVYZQT[]Y[X\bfbfm]ONOQMIDDBCHGGFHIHGEDAACB@@@@?===><<<<<;9;;>>=;<<==<<<<<<<==;;;<=><;<<<==<;869===<<=;::=>=:989;==<<<;<:;;<<:;=:>>=>>>?>>=>><=<=><====><>===<=<:<;;;:;<<<<=;:<8>=;:968;:78<;;;:;;<::98987:9889:;;78:88:<=;;;<==;;;=?><;;::::;;==>><<<;<::98876:787988987767657766@DEIJFB@=AGILMIEBERZZ\VIDHLKGDBABABCDEEHCDEDDDFB@@@@@?ADFECA>?CEBA????<@AAFFFB@BB?BGFEDAB>CCB??==?A?>@FIHGDEGB>??BDDEE>==??===<=ABAA@@ADCB?>?CCDLMBDFCEGLKC?DEC@??>>;>>>A;;?AD>???A@?==>>===??=<<<=?A@=<=>AA@A?>?><==>?@B@BBA@>=>?>=>>>>?B@GQRU[TQSYXZ[TX^adfgZONORPJFEEEGHHHIJJMJHCADBA@@?>>>>><=<<8879;@=><;=<><==<<<<<==<<====;=<<==<<;88<=>><=<::;><<98:=>=;;<<<<;;9:;<<=;>>==?=>==>><=>>===>>?=<>=>
[truncated: 865,125 more chars]
